# Supplementary material for: Genomics Characterization of an Engineered Corynebacterium glutamicum in Bioreactor Cultivation Under Ionic Liquid Stress
Source: Front Bioeng Biotechnol. 2021 Nov 18;9:766674. doi: 10.3389/fbioe.2021.766674 (PMC8637627; doi:10.3389/fbioe.2021.766674)
Supplement: Supplementary file 2 [file DataSheet2.xlsx]

## Sheet: Dataset S1
Table S1: List of genes differentially expressed as a function of transition from shake flask to fed-batch bioreactor
S. No.	Gene	Gene Name	Description	Differential Expression Log2 Ratio	GO	GO Term	Differential expression p-value
1	Cgl2886	-	FAD-dependent oxidoreductase	6.44	F:GO:0004499; F:GO:0050660; F:GO:0050661	F:N,N-dimethylaniline monooxygenase activity; F:flavin adenine dinucleotide binding; F:NADP binding	0
2	Cgl2807	adhA	alcohol dehydrogenase	5.91	F:GO:0004022	F:alcohol dehydrogenase (NAD+) activity	0
3	Cgl1139	metE	5-methyltetrahydropteroyltriglutamate--homocysteine S-methyltransferase	5.82	P:GO:0009086; P:GO:0032259; F:GO:0003871; F:GO:0008270	P:methionine biosynthetic process; P:methylation; F:5-methyltetrahydropteroyltriglutamate-homocysteine S-methyltransferase activity; F:zinc ion binding	0
4	Cgl3007	mez	malate dehydrogenase	5.11	F:GO:0004471; F:GO:0004473; F:GO:0008948; F:GO:0046872; F:GO:0051287	F:malate dehydrogenase (decarboxylating) (NAD+) activity; F:malate dehydrogenase (decarboxylating) (NADP+) activity; F:oxaloacetate decarboxylase activity; F:metal ion binding; F:NAD binding	0
5	Cgl0810	-	iron ABC transporter substrate-binding protein	4.65	P:GO:0055085; F:GO:0022857; C:GO:0005886; C:GO:0016021	P:transmembrane transport; F:transmembrane transporter activity; C:plasma membrane; C:integral component of membrane	0
6	Cgl1398	argF	ornithine carbamoyltransferase	4.49	P:GO:0006526; P:GO:0006591; F:GO:0004585; F:GO:0016597; C:GO:0005737	P:arginine biosynthetic process; P:ornithine metabolic process; F:ornithine carbamoyltransferase activity; F:amino acid binding; C:cytoplasm	0
7	Cgl2887	-	NAD(P)/FAD-dependent oxidoreductase	4.47	F:GO:0004499; F:GO:0050660; F:GO:0050661	F:N,N-dimethylaniline monooxygenase activity; F:flavin adenine dinucleotide binding; F:NADP binding	0
8	Cgl1396	argB	acetylglutamate kinase	4.27	P:GO:0016310; P:GO:0042450; F:GO:0003991; F:GO:0005524; C:GO:0005737	P:phosphorylation; P:arginine biosynthetic process via ornithine; F:acetylglutamate kinase activity; F:ATP binding; C:cytoplasm	0
9	Cgl2403	-	Hypothetical protein	4.27	0	0	0
10	Cgl1315	leuC	3-isopropylmalate dehydratase large subunit	4.24	P:GO:0009082; P:GO:0009098; F:GO:0003861; F:GO:0016853; F:GO:0046872; F:GO:0047456; F:GO:0051539	P:branched-chain amino acid biosynthetic process; P:leucine biosynthetic process; F:3-isopropylmalate dehydratase activity; F:isomerase activity; F:metal ion binding; F:2-methylisocitrate dehydratase activity; F:4 iron, 4 sulfur cluster binding	0
11	Cgl2996	-	myo-inositol-1-phosphate synthase	4.23	P:GO:0006021; P:GO:0008654; F:GO:0004512	P:inositol biosynthetic process; P:phospholipid biosynthetic process; F:inositol-3-phosphate synthase activity	0
12	Cgl0954	ggtB	gamma-glutamyltransferase	3.96	P:GO:0006508; P:GO:0006751; F:GO:0036374; F:GO:0102953; F:GO:0103068	P:proteolysis; P:glutathione catabolic process; F:glutathione hydrolase activity; F:hypoglycin A gamma-glutamyl transpeptidase activity; F:leukotriene C4 gamma-glutamyl transferase activity	0
13	Cgl1316	leuD	3-isopropylmalate dehydratase small subunit	3.93	P:GO:0009082; P:GO:0009098; F:GO:0003861; F:GO:0016853; C:GO:0009316	P:branched-chain amino acid biosynthetic process; P:leucine biosynthetic process; F:3-isopropylmalate dehydratase activity; F:isomerase activity; C:3-isopropylmalate dehydratase complex	0
14	Cgl2652	-	ABC transporter substrate-binding protein	3.92	P:GO:0055085; C:GO:0043190	P:transmembrane transport; C:ATP-binding cassette (ABC) transporter complex	4e-18
15	Cgl2566	sucC	ADP-forming succinate--CoA ligase subunit beta	3.91	P:GO:0006099; F:GO:0000287; F:GO:0004775; F:GO:0005524	P:tricarboxylic acid cycle; F:magnesium ion binding; F:succinate-CoA ligase (ADP-forming) activity; F:ATP binding	0
16	Cgl1395	argJ	bifunctional glutamate N-acetyltransferase/amino-acid acetyltransferase ArgJ	3.89	P:GO:0006526; F:GO:0004042; F:GO:0004358; F:GO:0103045; C:GO:0005737	P:arginine biosynthetic process; F:acetyl-CoA:L-glutamate N-acetyltransferase activity; F:glutamate N-acetyltransferase activity; F:methione N-acyltransferase activity; C:cytoplasm	0
17	Cgl2889	psp5	N-acetylmuramoyl-L-alanine amidase	3.87	P:GO:0009253; F:GO:0008270; F:GO:0008745	P:peptidoglycan catabolic process; F:zinc ion binding; F:N-acetylmuramoyl-L-alanine amidase activity	0
18	Cgl1397	argD	acetylornithine aminotransferase	3.86	P:GO:0006526; F:GO:0003992; F:GO:0030170; C:GO:0005737	P:arginine biosynthetic process; F:N2-acetyl-L-ornithine:2-oxoglutarate 5-aminotransferase activity; F:pyridoxal phosphate binding; C:cytoplasm	0
19	Cgl2226	-	RecName: Full=Uncharacterized protein Cgl2226/cg2444; Short=P24	3.85	0	0	0
20	Cgl0835	-	Tat pathway signal sequence domain protein	3.82	0	0	0
21	Cgl2565	sucD	succinyl-CoA synthetase subunit alpha	3.8	P:GO:0006099; F:GO:0000166; F:GO:0004775	P:tricarboxylic acid cycle; F:nucleotide binding; F:succinate-CoA ligase (ADP-forming) activity	0
22	Cgl0971	porC	putative secreted protein	3.63	0	0	0
23	Cgl2796	ald	aldehyde dehydrogenase	3.43	F:GO:0004029; F:GO:0043878	F:aldehyde dehydrogenase (NAD+) activity; F:glyceraldehyde-3-phosphate dehydrogenase (NAD+) (non-phosphorylating) activity	0
24	Cgl0658	prpB2	methylisocitrate lyase	3.43	P:GO:0019629; F:GO:0000287; F:GO:0046421	P:propionate catabolic process, 2-methylcitrate cycle; F:magnesium ion binding; F:methylisocitrate lyase activity	0
25	Cgl1029	-	amino acid transporter	3.41	C:GO:0016021	C:integral component of membrane	0
26	Cgl1401	argH	argininosuccinate lyase	3.34	P:GO:0042450; F:GO:0004056; C:GO:0005737	P:arginine biosynthetic process via ornithine; F:argininosuccinate lyase activity; C:cytoplasm	0
27	Cgl2988	-	transcriptional regulator	3.33	P:GO:0006355; F:GO:0003700	P:regulation of transcription, DNA-templated; F:DNA-binding transcription factor activity	0
28	Cgl3075	-	ABC transporter substrate-binding protein	3.3	F: GO:0005215	F: Transporter activity	5.1e-14
29	Cgl1399	argR	arginine repressor	3.26	P:GO:0006526; P:GO:0045893; P:GO:0051259; F:GO:0000976; F:GO:0001216; F:GO:0034618; C:GO:0005737; C:GO:0032993	P:arginine biosynthetic process; P:positive regulation of transcription, DNA-templated; P:protein complex oligomerization; F:transcription regulatory region sequence-specific DNA binding; F:DNA-binding transcription activator activity; F:arginine binding; C:cytoplasm; C:protein-DNA complex	0
30	Cgl0155	pepO	peptidase M13	3.26	P:GO:0006508; F:GO:0004222; F:GO:0046872	P:proteolysis; F:metalloendopeptidase activity; F:metal ion binding	0
31	Cgl1394	argC	N-acetyl-gamma-glutamyl-phosphate reductase	3.25	P:GO:0006526; F:GO:0003942; F:GO:0046983; F:GO:0051287; C:GO:0005737	P:arginine biosynthetic process; F:N-acetyl-gamma-glutamyl-phosphate reductase activity; F:protein dimerization activity; F:NAD binding; C:cytoplasm	0
32	Cgl1030	-	sodium-dependent transporter	3.21	P:GO:0055085; F:GO:0015293; C:GO:0016021	P:transmembrane transport; F:symporter activity; C:integral component of membrane	0
33	Cgl2402	catA	hydroxyquinol 1,2-dioxygenase	3.19	P:GO:0009712; P:GO:0019439; F:GO:0008199; F:GO:0018576	P:catechol-containing compound metabolic process; P:aromatic compound catabolic process; F:ferric iron binding; F:catechol 1,2-dioxygenase activity	0
34	Cgl0653	metY	cystathionine gamma-synthase	3.14	P:GO:0019346; P:GO:0071266; F:GO:0003961; F:GO:0030170	P:transsulfuration; P:'de novo' L-methionine biosynthetic process; F:O-acetylhomoserine aminocarboxypropyltransferase activity; F:pyridoxal phosphate binding	0
35	Cgl0657	prpD2	2-methylcitrate dehydratase	3.14	P:GO:0006099; P:GO:0019679; F:GO:0003994; F:GO:0047547; F:GO:0047780	P:tricarboxylic acid cycle; P:propionate metabolic process, methylcitrate cycle; F:aconitate hydratase activity; F:2-methylcitrate dehydratase activity; F:citrate dehydratase activity	1.1e-08
36	Cgl2921	-	alanine:cation symporter family protein	3.08	P:GO:0006814; P:GO:0032328; P:GO:0055085; F:GO:0015655; C:GO:0005886; C:GO:0016021	P:sodium ion transport; P:alanine transport; P:transmembrane transport; F:alanine:sodium symporter activity; C:plasma membrane; C:integral component of membrane	0
37	Cgl0321	-	SDR family oxidoreductase	3.05	F:GO:0004316; F:GO:0102131; F:GO:0102132	F:3-oxoacyl-[acyl-carrier-protein] reductase (NADPH) activity; F:3-oxo-glutaryl-[acp] methyl ester reductase activity; F:3-oxo-pimeloyl-[acp] methyl ester reductase activity	6.1e-07
38	Cgl1400	argG	argininosuccinate synthase	3.04	P:GO:0006526; F:GO:0004055; F:GO:0005524; C:GO:0005737	P:arginine biosynthetic process; F:argininosuccinate synthase activity; F:ATP binding; C:cytoplasm	0
39	Cgl0919	-	3-hydroxyisobutyryl-CoA hydrolase	2.99	F:GO:0003860; F:GO:0016853	F:3-hydroxyisobutyryl-CoA hydrolase activity; F:isomerase activity	4.9e-14
40	Cgl2115	-	transcriptional regulator	2.98	0	0	0
41	Cgl2301	dcp	peptidase	2.98	P:GO:0006508; F:GO:0004180; F:GO:0004222; F:GO:0046872	P:proteolysis; F:carboxypeptidase activity; F:metalloendopeptidase activity; F:metal ion binding	0
42	Cgl1286	leuB	3-isopropylmalate dehydrogenase	2.98	P:GO:0009082; P:GO:0009098; F:GO:0000287; F:GO:0003862; F:GO:0051287; C:GO:0005737	P:branched-chain amino acid biosynthetic process; P:leucine biosynthetic process; F:magnesium ion binding; F:3-isopropylmalate dehydrogenase activity; F:NAD binding; C:cytoplasm	0
43	Cgl0659	prpC2	citrate synthase	2.98	P:GO:0006099; P:GO:0019679; F:GO:0036440; F:GO:0050440; C:GO:0005737	P:tricarboxylic acid cycle; P:propionate metabolic process, methylcitrate cycle; F:citrate synthase activity; F:2-methylcitrate synthase activity; C:cytoplasm	0
44	Cgl0160	msmA	methylmalonate-semialdehyde dehydrogenase	2.85	F:GO:0004491	F:methylmalonate-semialdehyde dehydrogenase (acylating) activity	4.5e-06
45	Cgl2617	ddh	diaminopimelate dehydrogenase	2.85	P:GO:0009089; P:GO:0019877; F:GO:0000166; F:GO:0047850	P:lysine biosynthetic process via diaminopimelate; P:diaminopimelate biosynthetic process; F:nucleotide binding; F:diaminopimelate dehydrogenase activity	0
46	Cgl0192	-	membrane protein	2.84	C:GO:0016021	C:integral component of membrane	2.3e-16
47	Cgl1894	-	MULTISPECIES: hypothetical protein	2.83	0	0	0.00013
48	Cgl0319	fadH	alcohol dehydrogenase	2.82	F:GO:0008270; F:GO:0050607	F:zinc ion binding; F:mycothiol-dependent formaldehyde dehydrogenase activity	0
49	Cgl2875	cop1	protein PS1	2.78	F:GO:0016740; C:GO:0005576	F:transferase activity; C:extracellular region	0
50	Cgl2821	phnB1	glyoxalase	2.77	P:GO:0032259; F:GO:0008168	P:methylation; F:methyltransferase activity	8.9e-11
51	Cgl0656	-	2-methylcitrate dehydratase	2.77	P:GO:0006099; P:GO:0019679; F:GO:0003994; F:GO:0047547; F:GO:0047780	P:tricarboxylic acid cycle; P:propionate metabolic process, methylcitrate cycle; F:aconitate hydratase activity; F:2-methylcitrate dehydratase activity; F:citrate dehydratase activity	7.8e-07
52	Cgl0724	-	carbohydrate ABC transporter permease	2.77	P:GO:0055085; C:GO:0005886; C:GO:0016021	P:transmembrane transport; C:plasma membrane; C:integral component of membrane	0
53	Cgl2874	-	putative secreted protein	2.76	0	0	0
54	Cgl2872	fadD2	acyl-CoA synthase	2.71	F:GO:0016874	F:ligase activity	0
55	Cgl1258	-	Na+-dependent transporter	2.68	C:GO:0016021	C:integral component of membrane	3.5e-08
56	Cgl1178	-	alpha/beta hydrolase	2.66	F:GO:0016746; F:GO:0016787	F:transferase activity, transferring acyl groups; F:hydrolase activity	0
57	Cgl0725	-	ABC transporter permease	2.65	P:GO:0055085; C:GO:0005886; C:GO:0016021	P:transmembrane transport; C:plasma membrane; C:integral component of membrane	0
58	Cgl0073	-	MULTISPECIES: hypothetical protein	2.63	0	0	1.5e-09
59	Cgl0788	-	pyridoxal biosynthesis lyase PdxS	2.63	P:GO:0006541; P:GO:0042823; F:GO:0016757; F:GO:0036381	P:glutamine metabolic process; P:pyridoxal phosphate biosynthetic process; F:transferase activity, transferring glycosyl groups; F:pyridoxal 5'-phosphate synthase (glutamine hydrolysing) activity	0
60	Cgl2000	-	VOC family protein	2.62	P:GO:0032259; F:GO:0008168	P:methylation; F:methyltransferase activity	0
61	Cgl0709	birA	biotin--[acetyl-CoA-carboxylase] ligase	2.6	P:GO:0006464; F:GO:0004077	P:cellular protein modification process; F:biotin-[acetyl-CoA-carboxylase] ligase activity	0
62	Cgl1407	uspA2	stress protein	2.57	0	0	0
63	Cgl0955	-	MULTISPECIES: hypothetical protein	2.56	0	0	0
64	Cgl1538	-	C40 family peptidase	2.56	F:GO:0016787	F:hydrolase activity	0
65	Cgl0032	-	sugar ABC transporter ATP-binding protein	2.55	P:GO:0071702; F:GO:0005524; F:GO:0016887	P:organic substance transport; F:ATP binding; F:ATPase activity	0
66	Cgl3021	nagL	maleylpyruvate isomerase	2.55	F:GO:0046872; F:GO:0050077	F:metal ion binding; F:maleylpyruvate isomerase activity	8.7e-07
67	Cgl0158	iolC	5-dehydro-2-deoxygluconokinase	2.54	P:GO:0046835; F:GO:0008865	P:carbohydrate phosphorylation; F:fructokinase activity	1e-06
68	Cgl2225	-	MFS transporter	2.53	P:GO:0055085; F:GO:0022857; C:GO:0016021	P:transmembrane transport; F:transmembrane transporter activity; C:integral component of membrane	0
69	Cgl0637	-	methionine ABC transporter substrate-binding protein	2.53	C:GO:0016020	C:membrane	0
70	Cgl0465	-	4a-hydroxytetrahydrobiopterin dehydratase	2.48	P:GO:0006729; F:GO:0008124	P:tetrahydrobiopterin biosynthetic process; F:4-alpha-hydroxytetrahydrobiopterin dehydratase activity	7.1e-13
71	Cgl0033	-	hypothetical protein cgR_0047	2.48	C:GO:0016021	C:integral component of membrane	0
72	Cgl0915	-	antibiotic biosynthesis monooxygenase	2.41	0	0	0
73	Cgl1649	ppiB	peptidylprolyl isomerase	2.4	P:GO:0000413; F:GO:0003755; C:GO:0016021	P:protein peptidyl-prolyl isomerization; F:peptidyl-prolyl cis-trans isomerase activity; C:integral component of membrane	0
74	Cgl3023	nagI	gentisate 1,2-dioxygenase	2.4	F:GO:0047922	F:gentisate 1,2-dioxygenase activity	1.7e-05
75	Cgl2426	pepN	aminopeptidase N	2.4	P:GO:0006508; F:GO:0004177; F:GO:0008237; F:GO:0008270	P:proteolysis; F:aminopeptidase activity; F:metallopeptidase activity; F:zinc ion binding	0
76	Cgl0284	phdA	acyl-CoA synthetase	2.37	P:GO:0001676; F:GO:0004467; F:GO:0102391	P:long-chain fatty acid metabolic process; F:long-chain fatty acid-CoA ligase activity; F:decanoate-CoA ligase activity	0.00015
77	Cgl0811	-	iron ABC transporter permease	2.36	P:GO:0055085; F:GO:0022857; C:GO:0005886; C:GO:0016021	P:transmembrane transport; F:transmembrane transporter activity; C:plasma membrane; C:integral component of membrane	7.9e-24
78	Cgl0191	-	Hypothetical protein	2.35	0	0	1.9e-19
79	Cgl1248	-	siderophore-interacting protein	2.35	F:GO:0016491	F:oxidoreductase activity	3.7e-10
80	Cgl0819	-	resuscitation-promoting factor Rpf1	2.34	F:GO:0016787; C:GO:0005576; C:GO:0009986	F:hydrolase activity; C:extracellular region; C:cell surface	0
81	Cgl0159	-	deoxyribose-phosphate aldolase	2.32	F:GO:0047441	F:5-dehydro-2-deoxyphosphogluconate aldolase activity	0.00011
82	Cgl1644	-	flavoprotein	2.32	F:GO:0016491	F:oxidoreductase activity	4.9e-06
83	Cgl1074	lplA	lipoate--protein ligase	2.32	P:GO:0006464; F:GO:0016874	P:cellular protein modification process; F:ligase activity	7.2e-21
84	Cgl2726	-	dipeptidase	2.31	F:GO:0016787	F:hydrolase activity	0
85	Cgl3022	nagK	2-hydroxyhepta-2,4-diene-1,7-dioate isomerase	2.28	F:GO:0016787; F:GO:0016853	F:hydrolase activity; F:isomerase activity	4e-16
86	Cgl0870	-	MFS transporter	2.25	P:GO:1902358; F:GO:0008271; C:GO:0016021	P:sulfate transmembrane transport; F:secondary active sulfate transmembrane transporter activity; C:integral component of membrane	4.8e-06
87	Cgl1391	-	SGNH/GDSL hydrolase family protein	2.24	F:GO:0052689	F:carboxylic ester hydrolase activity	0
88	Cgl0289	phdE	phenylacetic acid degradation bifunctional protein PaaZ	2.24	P:GO:0006631	P:fatty acid metabolic process	0.00039
89	Cgl0463	menB	naphthoate synthase	2.23	P:GO:0009234; F:GO:0004300; F:GO:0008935	P:menaquinone biosynthetic process; F:enoyl-CoA hydratase activity; F:1,4-dihydroxy-2-naphthoyl-CoA synthase activity	1.6e-16
90	Cgl2579	-	fatty acid-binding protein	2.23	P:GO:0046907	P:intracellular transport	0
91	Cgl0916	-	antibiotic biosynthesis monooxygenase	2.22	0	0	0
92	Cgl0970	-	putative pyrophosphatase	2.22	0	0	8e-15
93	Cgl1423	-	GNAT family N-acetyltransferase	2.22	F:GO:0008080	F:N-acetyltransferase activity	0
94	Cgl2125	treZ	malto-oligosyltrehalose trehalohydrolase	2.22	P:GO:0005992; F:GO:0033942; C:GO:0005737	P:trehalose biosynthetic process; F:4-alpha-D-(1->4)-alpha-D-glucanotrehalose trehalohydrolase activity; C:cytoplasm	0
95	Cgl2079	gdh	glutamate dehydrogenase	2.21	P:GO:0006537; F:GO:0000166; F:GO:0004354; C:GO:0005737	P:glutamate biosynthetic process; F:nucleotide binding; F:glutamate dehydrogenase (NADP+) activity; C:cytoplasm	0
96	Cgl0320	-	Zn-dependent hydrolase	2.2	F:GO:0016787	F:hydrolase activity	0
97	Cgl0163	iolE	2-keto-myo-inositol dehydratase	2.19	F:GO:0016853; F:GO:0050114	F:isomerase activity; F:myo-inosose-2 dehydratase activity	8.2e-12
98	Cgl0369	-	Cro/Cl family transcriptional regulator	2.19	P:GO:0006355; F:GO:0003677	P:regulation of transcription, DNA-templated; F:DNA binding	0
99	Cgl0071	-	putative membrane protein	2.18	C:GO:0016021	C:integral component of membrane	0
100	Cgl2995	-	hemolysin D	2.18	C:GO:0016021	C:integral component of membrane	6.8e-23
101	Cgl0193	-	MULTISPECIES: hypothetical protein	2.17	0	0	1.3e-05
102	Cgl0095	amn	AMP nucleosidase	2.17	P:GO:0009116; P:GO:0044209; F:GO:0008714	P:nucleoside metabolic process; P:AMP salvage; F:AMP nucleosidase activity	1.8e-13
103	Cgl1951	gluB	ABC transporter	2.16	P:GO:0006865; C:GO:0005886	P:amino acid transport; C:plasma membrane	0
104	Cgl2927	sod	Superoxide dismutase	2.16	P:GO:0019430; F:GO:0004784; F:GO:0046872	P:removal of superoxide radicals; F:superoxide dismutase activity; F:metal ion binding	0
105	Cgl3043	-	DUF1684 domain-containing protein	2.15	0	0	4.1e-11
106	Cgl0343	cmt1	esterase	2.15	F:GO:0016740	F:transferase activity	0
107	Cgl3037	rmpA	PTS sugar transporter	2.14	P:GO:0009401; P:GO:0034219; F:GO:0008982	P:phosphoenolpyruvate-dependent sugar phosphotransferase system; P:carbohydrate transmembrane transport; F:protein-N(PI)-phosphohistidine-sugar phosphotransferase activity	1.1e-11
108	Cgl0031	-	ribose ABC transporter permease	2.14	P:GO:0055085; F:GO:0022857; C:GO:0005886; C:GO:0016021	P:transmembrane transport; F:transmembrane transporter activity; C:plasma membrane; C:integral component of membrane	0
109	Cgl0936	-	diguanylate cyclase	2.14	F:GO:0018580; F:GO:0051213	F:nitronate monooxygenase activity; F:dioxygenase activity	6.2e-07
110	Cgl2820	-	putative membrane protein	2.12	F:GO:0047134; C:GO:0016021	F:protein-disulfide reductase activity; C:integral component of membrane	1.6e-22
111	Cgl2401	catB	chloromuconate cycloisomerase	2.11	P:GO:0019439; F:GO:0018849; F:GO:0018850; F:GO:0030145	P:aromatic compound catabolic process; F:muconate cycloisomerase activity; F:chloromuconate cycloisomerase activity; F:manganese ion binding	3e-13
112	Cgl0812	-	iron ABC transporter permease	2.08	P:GO:0055085; F:GO:0022857; C:GO:0005886; C:GO:0016021	P:transmembrane transport; F:transmembrane transporter activity; C:plasma membrane; C:integral component of membrane	2.8e-20
113	Cgl0072	bioB	biotin synthase	2.08	P:GO:0009102; F:GO:0004076; F:GO:0005506; F:GO:0051537; F:GO:0051539	P:biotin biosynthetic process; F:biotin synthase activity; F:iron ion binding; F:2 iron, 2 sulfur cluster binding; F:4 iron, 4 sulfur cluster binding	4.5e-05
114	Cgl2591	gpx	glutathione peroxidase	2.08	P:GO:0006979; P:GO:0098869; F:GO:0004602	P:response to oxidative stress; P:cellular oxidant detoxification; F:glutathione peroxidase activity	0
115	Cgl0946	-	ABC transporter ATP-binding protein	2.08	F:GO:0005524; F:GO:0016887	F:ATP binding; F:ATPase activity	0
116	Cgl0183	-	histidine kinase	2.08	P:GO:0016310; F:GO:0016301	P:phosphorylation; F:kinase activity	5e-11
117	Cgl2716	groEL	chaperonin GroEL	2.05	P:GO:0042026; F:GO:0005524; F:GO:0051082; C:GO:0005737	P:protein refolding; F:ATP binding; F:unfolded protein binding; C:cytoplasm	0
118	Cgl0669	irp1	iron-siderophore ABC transporter substrate-binding protein	2.05	0	0	2.7e-09
119	Cgl0157	-	GntR family transcriptional regulator	2.04	P:GO:0006355; F:GO:0003677; F:GO:0003700	P:regulation of transcription, DNA-templated; F:DNA binding; F:DNA-binding transcription factor activity	3.2e-07
120	Cgl0668	-	iron ABC transporter permease	2.04	P:GO:0055085; F:GO:0022857; C:GO:0005886; C:GO:0016021	P:transmembrane transport; F:transmembrane transporter activity; C:plasma membrane; C:integral component of membrane	4.4e-05
121	Cgl0789	-	pyridoxal 5'-phosphate synthase glutaminase subunit PdxT	2.04	P:GO:0006543; P:GO:0009432; P:GO:0042823; F:GO:0004359; F:GO:0016757; F:GO:0036381	P:glutamine catabolic process; P:SOS response; P:pyridoxal phosphate biosynthetic process; F:glutaminase activity; F:transferase activity, transferring glycosyl groups; F:pyridoxal 5'-phosphate synthase (glutamine hydrolysing) activity	0
122	Cgl0799	hisN	inositol monophosphatase	2.04	P:GO:0000105; P:GO:0046855; F:GO:0004401; F:GO:0046872	P:histidine biosynthetic process; P:inositol phosphate dephosphorylation; F:histidinol-phosphatase activity; F:metal ion binding	7.3e-20
123	Cgl1110	-	DNA-binding protein	2.02	P:GO:0009691; F:GO:0003677; F:GO:0016787	P:cytokinin biosynthetic process; F:DNA binding; F:hydrolase activity	0
124	Cgl0161	iolB	5-deoxy-glucuronate isomerase	2.01	P:GO:0019310; F:GO:0008880; F:GO:0102482	P:inositol catabolic process; F:glucuronate isomerase activity; F:5-deoxy-D-glucuronate isomerase activity	4.5e-08
125	Cgl2841	bglG	PRD domain-containing protein	2.01	P:GO:0006355; F:GO:0003723	P:regulation of transcription, DNA-templated; F:RNA binding	0
126	Cgl1392	-	acyltransferase	2.01	F:GO:0016747; C:GO:0016021	F:transferase activity, transferring acyl groups other than amino-acyl groups; C:integral component of membrane	5.2e-15
127	Cgl0030	-	sugar ABC transporter substrate-binding protein	2.01	0	0	4.5e-15
128	Cgl0027	-	ABC transporter substrate-binding protein	-7.22	P:GO:0007155; P:GO:0030001; F:GO:0046872	P:cell adhesion; P:metal ion transport; F:metal ion binding	0
129	Cgl0026	-	putative secreted protein	-6.23	0	0	0
130	Cgl1080	-	ABC-type cobalt transport system, permease component CbiQ	-6.12	C:GO:0016021	C:integral component of membrane	0
131	Cgl1281	-	cobalt-zinc-cadmium resistance protein	-5.73	P:GO:0098655; F:GO:0008324; C:GO:0016021	P:cation transmembrane transport; F:cation transmembrane transporter activity; C:integral component of membrane	0
132	Cgl0482	-	cadmium-translocating P-type ATPase	-5.45	P:GO:0070574; F:GO:0005524; F:GO:0008551; F:GO:0019829; F:GO:0046872; C:GO:0005886; C:GO:0016021	P:cadmium ion transmembrane transport; F:ATP binding; F:P-type cadmium transporter activity; F:ATPase-coupled cation transmembrane transporter activity; F:metal ion binding; C:plasma membrane; C:integral component of membrane	0
133	Cgl0693	-	thioredoxin reductase	-5.32	P:GO:0098869; F:GO:0004791; C:GO:0016021	P:cellular oxidant detoxification; F:thioredoxin-disulfide reductase activity; C:integral component of membrane	0
134	Cgl0386	ctpA	cation-transporting ATPase	-5.2	P:GO:0070574; F:GO:0005524; F:GO:0008551; F:GO:0019829; F:GO:0046872; C:GO:0005886; C:GO:0016021	P:cadmium ion transmembrane transport; F:ATP binding; F:P-type cadmium transporter activity; F:ATPase-coupled cation transmembrane transporter activity; F:metal ion binding; C:plasma membrane; C:integral component of membrane	0
135	Cgl0029	-	ABC transporter ATP-binding protein	-5.03	F:GO:0005524; F:GO:0016887	F:ATP binding; F:ATPase activity	0
136	Cgl1140	-	putative membrane protein	-4.95	F:GO:0047134; C:GO:0016021	F:protein-disulfide reductase activity; C:integral component of membrane	0
137	Cgl0692	-	cobalamin biosynthesis protein CobW	-4.91	0	0	0
138	Cgl2574	pstC	phosphate ABC transporter permease	-4.9	P:GO:0006817; P:GO:0055085; F:GO:0005315; C:GO:0005886; C:GO:0016021	P:phosphate ion transport; P:transmembrane transport; F:inorganic phosphate transmembrane transporter activity; C:plasma membrane; C:integral component of membrane	0
139	Cgl1383	ugpA	glycerol-3-phosphate ABC transporter permease	-4.81	P:GO:0055085; C:GO:0005886; C:GO:0016021	P:transmembrane transport; C:plasma membrane; C:integral component of membrane	0
140	Cgl2575	pstS	phosphate ABC transporter substrate-binding protein PstS	-4.8	P:GO:0035435; F:GO:0042301; C:GO:0043190	P:phosphate ion transmembrane transport; F:phosphate ion binding; C:ATP-binding cassette (ABC) transporter complex	0
141	Cgl2572	pstB	glutamate ABC transporter ATP-binding protein	-4.69	P:GO:0035435; F:GO:0005315; F:GO:0005524; F:GO:0015415; C:GO:0005886	P:phosphate ion transmembrane transport; F:inorganic phosphate transmembrane transporter activity; F:ATP binding; F:ATPase-coupled phosphate ion transmembrane transporter activity; C:plasma membrane	0
142	Cgl2573	pstA	phosphate ABC transporter permease	-4.67	P:GO:0035435; F:GO:0005315; C:GO:0005887	P:phosphate ion transmembrane transport; F:inorganic phosphate transmembrane transporter activity; C:integral component of plasma membrane	0
143	Cgl0258	brnF	branched-chain amino acid transporter AzlC	-4.57	C:GO:0005886; C:GO:0016021	C:plasma membrane; C:integral component of membrane	0
144	Cgl2211	-	transporter	-4.57	P:GO:0006813; P:GO:0098655; F:GO:0008324; C:GO:0005886; C:GO:0016021	P:potassium ion transport; P:cation transmembrane transport; F:cation transmembrane transporter activity; C:plasma membrane; C:integral component of membrane	0
145	Cgl1262	lysE	lysine transporter LysE	-4.32	P:GO:0006865; C:GO:0005886; C:GO:0016021	P:amino acid transport; C:plasma membrane; C:integral component of membrane	0
146	Cgl1078	-	ECF transporter S component	-4.22	C:GO:0016021	C:integral component of membrane	0
147	Cgl0385	-	CopY family transcriptional regulator	-4.2	P:GO:0006355; F:GO:0003677; F:GO:0046872	P:regulation of transcription, DNA-templated; F:DNA binding; F:metal ion binding	0
148	Cgl1128	-	CueP family metal-binding protein	-4.15	0	0	0
149	Cgl0139	-	putative secreted protein	-3.99	0	0	0
150	Cgl2963	-	hypothetical protein	-3.95	0	0	0
151	Cgl3062	idhA1	inositol 2-dehydrogenase	-3.88	F:GO:0050112	F:inositol 2-dehydrogenase activity	0
152	Cgl1081	-	Adenylate kinase or related kinase	-3.84	0	0	0
153	Cgl2911	ldh	L-lactate dehydrogenase	-3.73	P:GO:0006096; F:GO:0004459; C:GO:0005737	P:glycolytic process; F:L-lactate dehydrogenase activity; C:cytoplasm	0
154	Cgl3063	idhA2	dehydrogenase	-3.63	F:GO:0050112	F:inositol 2-dehydrogenase activity	0
155	Cgl2999	dps	DNA starvation/stationary phase protection protein Dps	-3.56	F:GO:0003677; F:GO:0004322; F:GO:0008199	F:DNA binding; F:ferroxidase activity; F:ferric iron binding	0
156	Cgl2979	-	PadR family transcriptional regulator	-3.56	0	0	0
157	Cgl1079	-	ABC transporter ATP-binding protein	-3.55	F:GO:0005524; F:GO:0016887	F:ATP binding; F:ATPase activity	2.9e-14
158	Cgl0483	-	FAD-dependent oxidoreductase	-3.51	P:GO:0055114; F:GO:0016491	P:obsolete oxidation-reduction process; F:oxidoreductase activity	0
159	Cgl1463	thiD1	hydroxymethylpyrimidine/phosphomethylpyrimidine kinase	-3.44	P:GO:0009228; P:GO:0009229; P:GO:0016310; F:GO:0000287; F:GO:0004789; F:GO:0005524; F:GO:0008902; F:GO:0008972; F:GO:0016787	P:thiamine biosynthetic process; P:thiamine diphosphate biosynthetic process; P:phosphorylation; F:magnesium ion binding; F:thiamine-phosphate diphosphorylase activity; F:ATP binding; F:hydroxymethylpyrimidine kinase activity; F:phosphomethylpyrimidine kinase activity; F:hydrolase activity	0
160	Cgl1067	-	cysteine desulfurase	-3.43	F:GO:0008483; F:GO:0031071	F:transaminase activity; F:cysteine desulfurase activity	0
161	Cgl2962	-	copper-translocating P-type ATPase	-3.42	P:GO:0098655; F:GO:0005524; F:GO:0016787; F:GO:0019829; F:GO:0046872; C:GO:0005886; C:GO:0016021	P:cation transmembrane transport; F:ATP binding; F:hydrolase activity; F:ATPase-coupled cation transmembrane transporter activity; F:metal ion binding; C:plasma membrane; C:integral component of membrane	0
162	Cgl0028	-	metal ABC transporter permease	-3.34	P:GO:0055085; F:GO:0042626; C:GO:0005887; C:GO:0043190	P:transmembrane transport; F:ATPase-coupled transmembrane transporter activity; C:integral component of plasma membrane; C:ATP-binding cassette (ABC) transporter complex	0
163	Cgl1070	-	ADP-ribose pyrophosphatase	-3.29	F:GO:0016787	F:hydrolase activity	0
164	Cgl2040	thiS	sulfur carrier protein ThiS	-3.25	0	0	0
165	Cgl1422	-	segregation and condensation protein A	-3.24	P:GO:0007059	P:chromosome segregation	0
166	Cgl0259	brnE	AzlD domain-containing protein	-3.23	F:GO:0047134; C:GO:0016021	F:protein-disulfide reductase activity; C:integral component of membrane	0
167	Cgl2038	thiE	thiamine-phosphate pyrophosphorylase	-3.21	P:GO:0009228; P:GO:0009229; F:GO:0000287; F:GO:0004789	P:thiamine biosynthetic process; P:thiamine diphosphate biosynthetic process; F:magnesium ion binding; F:thiamine-phosphate diphosphorylase activity	0
168	Cgl1082	chaA	calcium:proton antiporter	-3.2	P:GO:0055085; C:GO:0016021	P:transmembrane transport; C:integral component of membrane	0
169	Cgl1156	-	DEAD/DEAH box helicase	-3.19	P:GO:0000027; P:GO:0006401; P:GO:0070417; F:GO:0003723; F:GO:0003724; F:GO:0005524; C:GO:0005737	P:ribosomal large subunit assembly; P:RNA catabolic process; P:cellular response to cold; F:RNA binding; F:RNA helicase activity; F:ATP binding; C:cytoplasm	0
170	Cgl2039	thiO	glycine oxidase ThiO	-3.18	P:GO:0009229; F:GO:0016491; F:GO:0050660	P:thiamine diphosphate biosynthetic process; F:oxidoreductase activity; F:flavin adenine dinucleotide binding	0
171	Cgl1069	nadA	quinolinate synthetase	-3.18	P:GO:0009435; P:GO:0019805; F:GO:0008987; F:GO:0046872; F:GO:0051539; C:GO:0005737	P:NAD biosynthetic process; P:quinolinate biosynthetic process; F:quinolinate synthetase A activity; F:metal ion binding; F:4 iron, 4 sulfur cluster binding; C:cytoplasm	0
172	Cgl1501	-	HigA family addiction module antidote protein	-3.16	F:GO:0003677	F:DNA binding	0
173	Cgl2498	-	membrane protein	-3.15	C:GO:0016021	C:integral component of membrane	0
174	Cgl0719	-	3-oxoacyl-ACP reductase	-3.14	F:GO:0004316; F:GO:0102131; F:GO:0102132	F:3-oxoacyl-[acyl-carrier-protein] reductase (NADPH) activity; F:3-oxo-glutaryl-[acp] methyl ester reductase activity; F:3-oxo-pimeloyl-[acp] methyl ester reductase activity	7.7e-11
175	Cgl2042	thiF	thiamine biosynthesis protein ThiF	-3.07	F:GO:0005524; F:GO:0008641; F:GO:0016779	F:ATP binding; F:ubiquitin-like modifier activating enzyme activity; F:nucleotidyltransferase activity	0
176	Cgl2279	-	ArsR family transcriptional regulator	-3.06	P:GO:0006355; F:GO:0003700	P:regulation of transcription, DNA-templated; F:DNA-binding transcription factor activity	0
177	Cgl0440	ccsA	cytochrome C biogenesis protein ResC	-3.01	P:GO:0017004; C:GO:0016021	P:cytochrome complex assembly; C:integral component of membrane	0
178	Cgl1301	-	Hypothetical membrane protein	-3	C:GO:0016021	C:integral component of membrane	0.00013
179	Cgl2041	thiG	thiazole synthase	-3	P:GO:0009228; P:GO:0009229; F:GO:0016783; C:GO:0005737	P:thiamine biosynthetic process; P:thiamine diphosphate biosynthetic process; F:sulfurtransferase activity; C:cytoplasm	2.2e-19
180	Cgl2055	-	ankyrin repeat-containing protein	-2.99	0	0	0
181	Cgl0940	-	lactoylglutathione lyase	-2.99	F:GO:0016829	F:lyase activity	2e-14
182	Cgl0380	-	MFS transporter	-2.99	P:GO:0055085; F:GO:0022857; C:GO:0005886; C:GO:0016021	P:transmembrane transport; F:transmembrane transporter activity; C:plasma membrane; C:integral component of membrane	0
183	Cgl2685	lmrB	MFS transporter permease	-2.99	P:GO:0055085; F:GO:0022857; C:GO:0005886; C:GO:0016021	P:transmembrane transport; F:transmembrane transporter activity; C:plasma membrane; C:integral component of membrane	0
184	Cgl0795	-	MULTISPECIES: hypothetical protein	-2.98	0	0	0
185	Cgl0381	-	MFS transporter	-2.89	P:GO:0055085; F:GO:0022857; C:GO:0005886; C:GO:0016021	P:transmembrane transport; F:transmembrane transporter activity; C:plasma membrane; C:integral component of membrane	0
186	Cgl2551	-	sodium:proton antiporter	-2.87	P:GO:0015810; P:GO:0015813; F:GO:0015293; C:GO:0016021	P:aspartate transmembrane transport; P:L-glutamate transmembrane transport; F:symporter activity; C:integral component of membrane	0
187	Cgl2293	-	putative secreted protein	-2.86	0	0	0
188	Cgl1068	nadC	nicotinate-nucleotide pyrophosphorylase	-2.86	P:GO:0009435; F:GO:0004514	P:NAD biosynthetic process; F:nicotinate-nucleotide diphosphorylase (carboxylating) activity	0
189	Cgl1464	thiM	hydroxyethylthiazole kinase	-2.82	P:GO:0009228; P:GO:0009229; P:GO:0016310; F:GO:0000287; F:GO:0004417; F:GO:0005524	P:thiamine biosynthetic process; P:thiamine diphosphate biosynthetic process; P:phosphorylation; F:magnesium ion binding; F:hydroxyethylthiazole kinase activity; F:ATP binding	2.4e-15
190	Cgl2595	dctA	C4-dicarboxylate transporter	-2.82	P:GO:0055085; F:GO:0015293; C:GO:0016021	P:transmembrane transport; F:symporter activity; C:integral component of membrane	0
191	Cgl0960	-	MULTISPECIES: hypothetical protein	-2.81	0	0	0
192	Cgl2526	ftn	ferritin-like protein	-2.81	P:GO:0006826; P:GO:0006879; F:GO:0004322; F:GO:0008199; C:GO:0005737	P:iron ion transport; P:cellular iron ion homeostasis; F:ferroxidase activity; F:ferric iron binding; C:cytoplasm	0
193	Cgl2836	-	band 7 protein	-2.8	P:GO:0006508; F:GO:0008233; C:GO:0016021	P:proteolysis; F:peptidase activity; C:integral component of membrane	0
194	Cgl2317	-	membrane protein	-2.79	C:GO:0016021	C:integral component of membrane	5.6e-16
195	Cgl1384	ugpE	sugar ABC transporter permease	-2.78	P:GO:0055085; C:GO:0005886; C:GO:0016021	P:transmembrane transport; C:plasma membrane; C:integral component of membrane	2e-13
196	Cgl2625	-	membrane protein	-2.72	0	0	0
197	Cgl2318	-	C4-dicarboxylate ABC transporter substrate-binding protein	-2.72	C:GO:0005886; C:GO:0016021	C:plasma membrane; C:integral component of membrane	0
198	Cgl0439	-	TlpA family protein disulfide reductase	-2.69	P:GO:0098869; F:GO:0016209; F:GO:0016491; F:GO:0016853	P:cellular oxidant detoxification; F:antioxidant activity; F:oxidoreductase activity; F:isomerase activity	0
199	Cgl0460	pitA	inorganic phosphate transporter	-2.69	P:GO:0006817; P:GO:0055085; F:GO:0005315; C:GO:0016021	P:phosphate ion transport; P:transmembrane transport; F:inorganic phosphate transmembrane transporter activity; C:integral component of membrane	0
200	Cgl2584	purF	amidophosphoribosyltransferase	-2.68	P:GO:0006189; P:GO:0006541; P:GO:0009113; P:GO:0009116; F:GO:0000287; F:GO:0004044; F:GO:0051539	P:'de novo' IMP biosynthetic process; P:glutamine metabolic process; P:purine nucleobase biosynthetic process; P:nucleoside metabolic process; F:magnesium ion binding; F:amidophosphoribosyltransferase activity; F:4 iron, 4 sulfur cluster binding	0
201	Cgl3061	-	sugar phosphate isomerase/epimerase	-2.66	F:GO:0016853	F:isomerase activity	3.2e-10
202	Cgl2624	otsA	trehalose-6-phosphate synthase	-2.66	P:GO:0005992; F:GO:0003824	P:trehalose biosynthetic process; F:catalytic activity	0
203	Cgl0308	cspA2	cold-shock protein	-2.65	F:GO:0003676; C:GO:0005737	F:nucleic acid binding; C:cytoplasm	0
204	Cgl2397	pcaG	protocatechuate 3,4-dioxygenase subunit alpha	-2.65	P:GO:0019439; F:GO:0008199; F:GO:0018578	P:aromatic compound catabolic process; F:ferric iron binding; F:protocatechuate 3,4-dioxygenase activity	0
205	Cgl0441	-	cytochrome C biogenesis protein ResB	-2.62	P:GO:0017004; C:GO:0016021	P:cytochrome complex assembly; C:integral component of membrane	0
206	Cgl0966	-	bifunctional lysylphosphatidylglycerol flippase/synthetase MprF	-2.6	C:GO:0005886; C:GO:0016021	C:plasma membrane; C:integral component of membrane	6.9e-15
207	Cgl1569	ctaA	heme A synthase	-2.58	P:GO:0006784; F:GO:0016627; C:GO:0016021	P:heme A biosynthetic process; F:oxidoreductase activity, acting on the CH-CH group of donors; C:integral component of membrane	0
208	Cgl1341	tnp23a(ISCg23a)	IS3 family transposase	-2.57	P:GO:0006313; P:GO:0015074; F:GO:0003677; F:GO:0004803	P:transposition, DNA-mediated; P:DNA integration; F:DNA binding; F:transposase activity	4.3e-08
209	Cgl2177	-	DUF2029 domain-containing protein	-2.56	F:GO:0016758; C:GO:0016021	F:transferase activity, transferring hexosyl groups; C:integral component of membrane	0
210	Cgl1076	pcaK	MFS transporter	-2.55	P:GO:0055085; F:GO:0022857; C:GO:0016021	P:transmembrane transport; F:transmembrane transporter activity; C:integral component of membrane	0
211	Cgl2943	uspA3	universal stress protein	-2.54	0	0	0
212	Cgl1565	-	transcriptional regulator	-2.54	P:GO:0006355; F:GO:0003700	P:regulation of transcription, DNA-templated; F:DNA-binding transcription factor activity	0
213	Cgl1343	tnp24a(ISCg24a)	IS3 family transposase	-2.53	P:GO:0015074; P:GO:0032196; F:GO:0003676	P:DNA integration; P:transposition; F:nucleic acid binding	0
214	Cgl1448	-	HlyC/CorC family transporter	-2.53	C:GO:0016021	C:integral component of membrane	0
215	Cgl2396	pcaB	3-carboxy-cis,cis-muconate cycloisomerase	-2.52	P:GO:0019619; F:GO:0018842; F:GO:0047472	P:3,4-dihydroxybenzoate catabolic process; F:3-carboxymuconate cycloisomerase type II activity; F:3-carboxy-cis,cis-muconate cycloisomerase activity	1.4e-12
216	Cgl0236	gltX	tRNA glutamyl-Q(34) synthetase GluQRS	-2.51	P:GO:0006400; P:GO:0006412; P:GO:0043039; F:GO:0004812; F:GO:0005524; F:GO:0008270	P:tRNA modification; P:translation; P:tRNA aminoacylation; F:aminoacyl-tRNA ligase activity; F:ATP binding; F:zinc ion binding	8.8e-19
217	Cgl0618	-	putative secreted protein	-2.5	0	0	0
218	Cgl1336	int1	site-specific integrase	-2.49	P:GO:0006310; P:GO:0015074; F:GO:0003677	P:DNA recombination; P:DNA integration; F:DNA binding	3.6e-05
219	Cgl2316	-	GntR family transcriptional regulator	-2.47	P:GO:0006355; F:GO:0003677; F:GO:0003700	P:regulation of transcription, DNA-templated; F:DNA binding; F:DNA-binding transcription factor activity	2.6e-20
220	Cgl1449	-	HlyC/CorC family transporter	-2.44	F:GO:0050660; C:GO:0016021	F:flavin adenine dinucleotide binding; C:integral component of membrane	0
221	Cgl0489	rpoC	DNA-directed RNA polymerase subunit beta'	-2.43	P:GO:0006351; F:GO:0000287; F:GO:0003677; F:GO:0003899; F:GO:0008270	P:transcription, DNA-templated; F:magnesium ion binding; F:DNA binding; F:DNA-directed 5'-3' RNA polymerase activity; F:zinc ion binding	0
222	Cgl1194	-	HlyC/CorC family transporter	-2.43	F:GO:0050660; C:GO:0016021	F:flavin adenine dinucleotide binding; C:integral component of membrane	0
223	Cgl0875	cgtS2	HAMP domain-containing histidine kinase	-2.42	P:GO:0000160; P:GO:0018106; F:GO:0000155; C:GO:0005886; C:GO:0016021	P:phosphorelay signal transduction system; P:peptidyl-histidine phosphorylation; F:phosphorelay sensor kinase activity; C:plasma membrane; C:integral component of membrane	0
224	Cgl2529	-	sodium:proton exchanger	-2.42	P:GO:0055085; C:GO:0016021	P:transmembrane transport; C:integral component of membrane	0
225	Cgl0174	cspA	cold-shock protein	-2.4	F:GO:0003676; C:GO:0005737	F:nucleic acid binding; C:cytoplasm	0
226	Cgl1476	-	polyisoprenoid-binding protein	-2.39	C:GO:0016021	C:integral component of membrane	0
227	Cgl1305	thiC	phosphomethylpyrimidine synthase ThiC	-2.38	P:GO:0009228; P:GO:0009229; F:GO:0008270; F:GO:0016830; F:GO:0051539	P:thiamine biosynthetic process; P:thiamine diphosphate biosynthetic process; F:zinc ion binding; F:carbon-carbon lyase activity; F:4 iron, 4 sulfur cluster binding	3.3e-06
228	Cgl2144	dinP	DNA polymerase IV	-2.37	P:GO:0006261; P:GO:0006281; P:GO:0071897; F:GO:0000287; F:GO:0003684; F:GO:0003887; C:GO:0005737	P:DNA-dependent DNA replication; P:DNA repair; P:DNA biosynthetic process; F:magnesium ion binding; F:damaged DNA binding; F:DNA-directed DNA polymerase activity; C:cytoplasm	3.7e-14
229	Cgl1127	-	putative secreted protein	-2.37	0	0	0
230	Cgl2298	-	iron ABC transporter ATP-binding protein	-2.36	P:GO:0055085; F:GO:0005524; F:GO:0042626; C:GO:0016021	P:transmembrane transport; F:ATP binding; F:ATPase-coupled transmembrane transporter activity; C:integral component of membrane	0
231	Cgl1065	-	MFS transporter	-2.35	P:GO:0055085; F:GO:0022857; C:GO:0016021	P:transmembrane transport; F:transmembrane transporter activity; C:integral component of membrane	2.6e-13
232	Cgl2315	glcD	FAD-binding oxidoreductase	-2.35	P:GO:0032259; F:GO:0008168; F:GO:0019154; F:GO:0046872; F:GO:0051536; F:GO:0071949	P:methylation; F:methyltransferase activity; F:glycolate dehydrogenase activity; F:metal ion binding; F:iron-sulfur cluster binding; F:FAD binding	2.1e-15
233	Cgl1337	-	MULTISPECIES: hypothetical protein	-2.34	0	0	0
234	Cgl1282	-	DUF262 domain-containing protein	-2.34	0	0	0
235	Cgl3056	catA3	hydroxyquinol 1,2-dioxygenase	-2.34	P:GO:0009712; P:GO:0019439; F:GO:0008199; F:GO:0018576	P:catechol-containing compound metabolic process; P:aromatic compound catabolic process; F:ferric iron binding; F:catechol 1,2-dioxygenase activity	4.5e-10
236	Cgl2757	-	putative secreted protein	-2.28	0	0	6.1e-10
237	Cgl1475	-	putative membrane protein	-2.27	C:GO:0016021	C:integral component of membrane	0
238	Cgl2314	-	permease	-2.27	P:GO:0055085; C:GO:0016021	P:transmembrane transport; C:integral component of membrane	0
239	Cgl0060	-	CotH kinase family protein	-2.22	0	0	0
240	Cgl3020	-	HigA family addiction module antidote protein	-2.21	F:GO:0003677; C:GO:0016021	F:DNA binding; C:integral component of membrane	0
241	Cgl1427	cmk	cytidylate kinase	-2.2	P:GO:0006220; P:GO:0016310; P:GO:0046940; F:GO:0004127; F:GO:0005524; C:GO:0005737	P:pyrimidine nucleotide metabolic process; P:phosphorylation; P:nucleoside monophosphate phosphorylation; F:cytidylate kinase activity; F:ATP binding; C:cytoplasm	0
242	Cgl1546	pacL	carbonate dehydratase	-2.2	F:GO:0005524; C:GO:0005886; C:GO:0016021	F:ATP binding; C:plasma membrane; C:integral component of membrane	5.6e-11
243	Cgl0182	tnp2f(ISCg2f)	transposase	-2.2	P:GO:0015074	P:DNA integration	0.0001
244	Cgl0531	-	ECF transporter S component	-2.2	P:GO:0055085; F:GO:0022857; C:GO:0016021	P:transmembrane transport; F:transmembrane transporter activity; C:integral component of membrane	4.2e-08
245	Cgl2222	-	MFS transporter	-2.18	P:GO:0055085; F:GO:0022857; C:GO:0016021	P:transmembrane transport; F:transmembrane transporter activity; C:integral component of membrane	0
246	Cgl0617	-	DNA polymerase	-2.18	P:GO:0006281	P:DNA repair	7e-14
247	Cgl3019	-	YbaN family protein	-2.17	F:GO:0003677; C:GO:0016021	F:DNA binding; C:integral component of membrane	7.6e-17
248	Cgl2020	-	ribosomal RNA large subunit methyltransferase N	-2.16	P:GO:0030488; P:GO:0070475; F:GO:0000049; F:GO:0002935; F:GO:0019843; F:GO:0046872; F:GO:0051539; F:GO:0070040; C:GO:0005737	P:tRNA methylation; P:rRNA base methylation; F:tRNA binding; F:tRNA (adenine-C2-)-methyltransferase activity; F:rRNA binding; F:metal ion binding; F:4 iron, 4 sulfur cluster binding; F:rRNA (adenine-C2-)-methyltransferase activity; C:cytoplasm	0
249	Cgl0967	-	esterase family protein	-2.16	C:GO:0016021	C:integral component of membrane	6.8e-12
250	Cgl2568	-	alpha/beta hydrolase	-2.12	F:GO:0004622; F:GO:0102545	F:lysophospholipase activity; F:phosphatidyl phospholipase B activity	1.7e-07
251	Cgl1567	-	ABC transporter ATP-binding protein	-2.11	F:GO:0005524; F:GO:0016887	F:ATP binding; F:ATPase activity	0
252	Cgl1351	-	putative KAP-like P-loop ATPase	-2.09	C:GO:0016020; C:GO:0016021	C:membrane; C:integral component of membrane	0
253	Cgl0865	-	No significant database matches	-2.07	0	0	4.5e-06
254	Cgl2605	bioD	ATP-dependent dethiobiotin synthetase BioD	-2.07	P:GO:0009102; F:GO:0000287; F:GO:0004141; F:GO:0005524; C:GO:0005737	P:biotin biosynthetic process; F:magnesium ion binding; F:dethiobiotin synthase activity; F:ATP binding; C:cytoplasm	1.7e-09
255	Cgl0651	-	DUF3500 domain-containing protein	-2.05	0	0	0
256	Cgl3060	-	dehydrogenase	-2.04	F:GO:0016491	F:oxidoreductase activity	1.2e-08
257	Cgl2499	-	MULTISPECIES: DUF3817 domain-containing protein	-2.02	C:GO:0005886; C:GO:0016021	C:plasma membrane; C:integral component of membrane	0
258	Cgl2497	-	peptidase M23	-2.02	0	0	7.6e-12

## Sheet: Dataset S2
Table S2: List of genes differentially expressed as a function of cultivation in a fed-batch bioreactor
S. No	Gene	Gene Name	Description	Differential Expression Log2 Ratio				GO	GO Term	Differential Expression p-value
				16.5 h/6.5 h	24 h/6.5 h	41 h/6.5 h	65 h/6.5 h			16.5 h/6.5 h	24 h/6.5 h	41 h/6.5 h	65 h/6.5 h
1	Cgl1502	-	MFS transporter	3.28	5.38	5.44	8.14	P:GO:0055085; F:GO:0022857; C:GO:0016021	P:transmembrane transport; F:transmembrane transporter activity; C:integral component of membrane	6.9e-16	5.38	0	0
2	Cgl1319	-	MULTISPECIES: hypothetical protein	4.66	5.63	5.64	6.3	0	0	2.3e-10	5.63	0	3.6e-05
3	Cgl0930	-	urea ABC transporter substrate-binding protein	2.45	3.35	3.74	6.22	0	0	2.1e-05	3.35	0	8.1e-32
4	Cgl0940	-	lactoylglutathione lyase	3.15	3.66	3.32	5.96	F:GO:0016829	F:lyase activity	1.9e-10	3.66	0	6.6e-24
5	Cgl2771	-	glycoside hydrolase family 76	2.54	3.17	3.48	5.89	P:GO:0005975; F:GO:0016787	P:carbohydrate metabolic process; F:hydrolase activity	5.8e-07	3.17	0	1.2e-29
6	Cgl0931	-	urea ABC transporter permease subunit UrtB	2.32	3.39	3.26	5.85	P:GO:0055085; F:GO:0022857; C:GO:0005886; C:GO:0016021	P:transmembrane transport; F:transmembrane transporter activity; C:plasma membrane; C:integral component of membrane	0.00016	3.39	0	5.2e-22
7	Cgl1583	amt	ammonium transporter	3.28	3.98	3.61	5.8	P:GO:0072488; F:GO:0008519; C:GO:0005886; C:GO:0016021	P:ammonium transmembrane transport; F:ammonium transmembrane transporter activity; C:plasma membrane; C:integral component of membrane	2.5e-08	3.98	0	2e-14
8	Cgl0757	-	phosphoribosyltransferase	3.82	4.39	4.71	5.77	P:GO:0009116; F:GO:0016757	P:nucleoside metabolic process; F:transferase activity, transferring glycosyl groups	1.2e-05	4.39	0	0.00043
9	Cgl0932	-	urea ABC transporter permease subunit UrtC	2.72	3.39	3.48	5.61	P:GO:0015803; P:GO:0055085; F:GO:0015658; C:GO:0005886; C:GO:0016021	P:branched-chain amino acid transport; P:transmembrane transport; F:branched-chain amino acid transmembrane transporter activity; C:plasma membrane; C:integral component of membrane	9e-06	3.39	0	3.1e-15
10	Cgl2457	phoB	alkaline phosphatase	3.87	2.12	2.12	5.54	P:GO:0016311; F:GO:0004035	P:dephosphorylation; F:alkaline phosphatase activity	0	2.12	0	0
11	Cgl0959	tnp3a(ISCg3a)	transposase	2.38	2.35	2.76	5.52	P:GO:0015074	P:DNA integration	8.1e-05	2.35	0	6.7e-18
12	Cgl1582	ocd	ornithine cyclodeaminase	3.61	4.71	4.11	5.42	F:GO:0008473	F:ornithine cyclodeaminase activity	2.5e-08	4.71	0	9.9e-08
13	Cgl1922	-	DUF4192 domain-containing protein	2.47	2.97	3.22	5.33	0	0	6.8e-05	2.97	0	1.6e-14
14	Cgl1307	-	Hypothetical protein	2.41	2.12	2.12	5.33	0	0	6.2e-11	2.12	0	0
15	Cgl0933	-	urea ABC transporter ATP-binding protein UrtD	2.96	3.23	3.33	5.25	F:GO:0005524	F:ATP binding	2.8e-07	3.23	0	2.1e-11
16	Cgl0300	-	septum site determining protein	2.92	3.35	3.5	5.09	0	0	1.6e-07	3.35	0	1e-11
17	Cgl2975	-	transposase	3.33	4.03	4.32	5.05	0	0	7.9e-06	4.03	0	2.5e-17
18	Cgl2699	dacB	D-alanyl-D-alanine carboxypeptidase	2.68	3.02	3.04	5.04	P:GO:0006508; F:GO:0009002; C:GO:0016021	P:proteolysis; F:serine-type D-Ala-D-Ala carboxypeptidase activity; C:integral component of membrane	4.9e-07	3.02	0	1.4e-14
19	Cgl1464	thiM	hydroxyethylthiazole kinase	2.17	3.49	2.77	4.98	P:GO:0009228; P:GO:0009229; P:GO:0016310; F:GO:0000287; F:GO:0004417; F:GO:0005524	P:thiamine biosynthetic process; P:thiamine diphosphate biosynthetic process; P:phosphorylation; F:magnesium ion binding; F:hydroxyethylthiazole kinase activity; F:ATP binding	6.2e-05	3.49	0	2.3e-16
20	Cgl1137	-	arabinose ABC transporter permease	2.31	2.88	2.62	4.91	P:GO:0055085; F:GO:0022857; C:GO:0016021	P:transmembrane transport; F:transmembrane transporter activity; C:integral component of membrane	1.5e-05	2.88	0	3.8e-16
21	Cgl0693	-	thioredoxin reductase	5.94	5.59	3.39	4.9	P:GO:0098869; F:GO:0004791; C:GO:0016021	P:cellular oxidant detoxification; F:thioredoxin-disulfide reductase activity; C:integral component of membrane	0	5.59	0	5.2e-14
22	Cgl2147	-	HEAT repeat domain-containing protein	2.99	4.32	4.29	4.89	0	0	0.00016	4.32	0	9.9e-05
23	Cgl2169	-	MULTISPECIES: hypothetical protein	2.51	2.45	2.5	4.83	0	0	3.1e-08	2.45	0	1.4e-18
24	Cgl0934	-	urea ABC transporter ATP-binding subunit UrtE	2.58	2.35	2.35	4.73	F:GO:0005524	F:ATP binding	3.4e-07	2.35	0	8.1e-14
25	Cgl2496	-	PucR family transcriptional regulator	2.68	3.23	3.25	4.69	0	0	5.1e-06	3.23	0	4e-09
26	Cgl0692	-	cobalamin biosynthesis protein CobW	4.79	3.65	3.82	4.51	0	0	0	3.65	0	6.4e-07
27	Cgl1346	-	hypothetical protein	2.95	2.64	3.02	4.51	0	0	1.5e-10	2.64	0	1e-11
28	Cgl1145	-	peptide synthetase	2.59	3.19	3.2	4.48	F:GO:0008080	F:N-acetyltransferase activity	7.7e-06	3.19	0	1.8e-08
29	Cgl2087	glgP2	Glycogen phosphorylase	2.76	3.73	3.68	4.38	P:GO:0005975; F:GO:0008184; F:GO:0030170; F:GO:0102250; F:GO:0102499	P:carbohydrate metabolic process; F:glycogen phosphorylase activity; F:pyridoxal phosphate binding; F:linear malto-oligosaccharide phosphorylase activity; F:SHG alpha-glucan phosphorylase activity	0.00028	3.73	0	0.00014
30	Cgl2145	-	EamA family transporter	2.54	2.95	3.17	4.22	C:GO:0016021	C:integral component of membrane	1.5e-05	2.95	0	3.8e-07
31	Cgl0585	-	hypothetical protein	3.22	3.6	3.79	4.2	0	0	3.1e-07	3.6	0	0.00018
32	Cgl0301	-	ATPase	2.63	3.48	3.4	4.12	0	0	2.5e-05	3.48	0	1.1e-05
33	Cgl0387	-	putative membrane protein	2.7	3.93	3.78	4.12	F:GO:0047134; C:GO:0016021	F:protein-disulfide reductase activity; C:integral component of membrane	0.00015	3.93	0	0.00021
34	Cgl2046	pcaB2	3-carboxy-cis,cis-muconate cycloisomerase	2.67	2.52	2.86	3.95	F:GO:0016853	F:isomerase activity	3.5e-06	2.52	0	8.3e-06
35	Cgl2656	-	LysE family translocator	2.14	2.73	2.81	3.95	P:GO:0006865; C:GO:0005886; C:GO:0016021	P:amino acid transport; C:plasma membrane; C:integral component of membrane	0.00039	2.73	0	8.2e-07
36	Cgl2757	-	putative secreted protein	2.34	2.21	2.62	3.94	0	0	1.3e-06	2.21	0	1e-09
37	Cgl2543	crcB	chromosome condensation protein CrcB	2.75	3.46	3.52	3.93	P:GO:0015698; P:GO:0034220; F:GO:0015103; F:GO:0016491; C:GO:0005887	P:inorganic anion transport; P:ion transmembrane transport; F:inorganic anion transmembrane transporter activity; F:oxidoreductase activity; C:integral component of plasma membrane	3.6e-06	3.46	0	3.8e-05
38	Cgl2348	-	ComEA family DNA-binding protein	2.84	3.1	3.38	3.8	P:GO:0006281; F:GO:0003677; C:GO:0016021	P:DNA repair; F:DNA binding; C:integral component of membrane	8.1e-07	3.1	0	9.4e-05
39	Cgl0962	-	TetR family transcriptional regulator	2.29	2.73	2.75	3.79	F:GO:0003677	F:DNA binding	1.4e-06	2.73	0	5.2e-09
40	Cgl2934	-	MarR family transcriptional regulator	2.28	2.85	2.87	3.65	P:GO:0006355; F:GO:0003700	P:regulation of transcription, DNA-templated; F:DNA-binding transcription factor activity	1.4e-05	2.85	0	6.8e-07
41	Cgl0258	brnF	branched-chain amino acid transporter AzlC	2.42	3.17	3.04	3.64	C:GO:0005886; C:GO:0016021	C:plasma membrane; C:integral component of membrane	5.8e-06	3.17	0	5.6e-06
42	Cgl1140	-	putative membrane protein	4.29	2.57	2.47	3.64	F:GO:0047134; C:GO:0016021	F:protein-disulfide reductase activity; C:integral component of membrane	0	2.57	0	6.4e-13
43	Cgl1666	-	putative membrane protein	2.11	3.03	2.9	3.63	0	0	0.00087	3.03	0	1.6e-05
44	Cgl0781	-	hypothetical protein cgR_0889	2.22	3.18	3.14	3.55	0	0	0.00065	3.18	0	0.00025
45	Cgl2485	gntV	gluconate kinase	2.04	2.2	2.35	3.51	P:GO:0005975; P:GO:0016310; F:GO:0005524; F:GO:0046316	P:carbohydrate metabolic process; P:phosphorylation; F:ATP binding; F:gluconokinase activity	1e-07	2.2	0	4.4e-12
46	Cgl1463	thiD1	hydroxymethylpyrimidine/phosphomethylpyrimidine kinase	2.71	3.12	2.99	3.48	P:GO:0009228; P:GO:0009229; P:GO:0016310; F:GO:0000287; F:GO:0004789; F:GO:0005524; F:GO:0008902; F:GO:0008972; F:GO:0016787	P:thiamine biosynthetic process; P:thiamine diphosphate biosynthetic process; P:phosphorylation; F:magnesium ion binding; F:thiamine-phosphate diphosphorylase activity; F:ATP binding; F:hydroxymethylpyrimidine kinase activity; F:phosphomethylpyrimidine kinase activity; F:hydrolase activity	7.8e-07	3.12	0	8.9e-05
47	Cgl2671	mutY	A/G-specific adenine glycosylase	2.18	3.02	3	3.37	P:GO:0006284; F:GO:0003677; F:GO:0016798; F:GO:0046872; F:GO:0051539	P:base-excision repair; F:DNA binding; F:hydrolase activity, acting on glycosyl bonds; F:metal ion binding; F:4 iron, 4 sulfur cluster binding	0.0002	3.02	0	6.6e-05
48	Cgl2831	-	ATP-binding cassette domain-containing protein	2.05	2.9	2.76	3.24	F:GO:0005524	F:ATP binding	0.00091	2.9	0	0.00034
49	Cgl2931	-	recombinase RecB	2.06	2.59	2.65	3.19	0	0	0.00015	2.59	0	4.6e-05
50	Cgl1367	ccpA1	LacI family transcriptional regulator	2.93	3.71	2.69	3.04	P:GO:0006355; F:GO:0003677	P:regulation of transcription, DNA-templated; F:DNA binding	8.3e-13	3.71	0	4.8e-05
51	Cgl2319	-	putative membrane protein	2.29	2.63	2.63	3.04	F:GO:0047134; C:GO:0016021	F:protein-disulfide reductase activity; C:integral component of membrane	4.6e-06	2.63	0	5.3e-05
52	Cgl2047	-	hypothetical protein cgR_5034	2.96	2.78	3.09	2.8	C:GO:0016021	C:integral component of membrane	2.2e-15	2.78	0	4.2e-05
53	Cgl0956	-	excalibur calcium-binding domain-containing protein	2.28	2.14	2.17	2.75	C:GO:0016021	C:integral component of membrane	1.3e-08	2.14	0	8.5e-06
54	Cgl2035	-	ABC transporter substrate-binding protein	2.58	2.39	2.48	2.7	0	0	9.8e-10	2.39	0	9.1e-05
55	Cgl1735	-	hypothetical protein	2.73	3	2.76	2.68	0	0	1.8e-09	3	0	0.00064
56	Cgl2542	crcB'	camphor resistance protein CrcB	2.46	2.65	2.66	2.68	P:GO:0015698; P:GO:0034220; F:GO:0015103; C:GO:0005887	P:inorganic anion transport; P:ion transmembrane transport; F:inorganic anion transmembrane transporter activity; C:integral component of plasma membrane	1.2e-07	2.65	0	0.00074
57	Cgl2038	thiE	thiamine-phosphate pyrophosphorylase	2.4	2.46	2.35	2.48	P:GO:0009228; P:GO:0009229; F:GO:0000287; F:GO:0004789	P:thiamine biosynthetic process; P:thiamine diphosphate biosynthetic process; F:magnesium ion binding; F:thiamine-phosphate diphosphorylase activity	1.5e-08	2.46	0	0.00049
58	Cgl2616	-	LysR family transcriptional regulator	2.35	2.15	2.32	2.45	P:GO:0006355; F:GO:0003700	P:regulation of transcription, DNA-templated; F:DNA-binding transcription factor activity	3.2e-08	2.15	0	0.00053
59	Cgl2405	benB	benzoate 1,2-dioxygenase small subunit	2.49	2.61	2.29	2.37	P:GO:0006725; F:GO:0018623	P:cellular aromatic compound metabolic process; F:benzoate 1,2-dioxygenase activity	5e-09	2.61	0	0.0009
60	Cgl2281	-	HNH endonuclease	2.11	0	4.54	6.78	0	0	2.9e-07	1.98	0	0
61	Cgl1192	-	serine protease	0	3.37	3.18	5.1	P:GO:0006508; P:GO:0016311; F:GO:0003993; F:GO:0008233; C:GO:0016021; C:GO:0030288	P:proteolysis; P:dephosphorylation; F:acid phosphatase activity; F:peptidase activity; C:integral component of membrane; C:outer membrane-bounded periplasmic space	0.0012	3.37	0	1.5e-10
62	Cgl0584	-	MULTISPECIES: hypothetical protein	0	3.65	3.76	4.49	0	0	0.0041	3.65	0	3.2e-06
63	Cgl2776	-	helix-turn-helix transcriptional regulator	0	3.31	4.89	8.29	F:GO:0003677	F:DNA binding	0.0043	3.31	0	0
64	Cgl2701	-	hypothetical protein KbCgl_25620	0	2.16	2.29	6.42	0	0	0.013	2.16	0	0
65	Cgl1602	priA	primosome assembly protein PriA	0	2.49	2.54	6.07	P:GO:0006268; P:GO:0006269; F:GO:0003677; F:GO:0003678; F:GO:0005524; F:GO:0008270; C:GO:1990077	P:DNA unwinding involved in DNA replication; P:DNA replication, synthesis of RNA primer; F:DNA binding; F:DNA helicase activity; F:ATP binding; F:zinc ion binding; C:primosome complex	0.037	2.49	0	0
66	Cgl1372	-	SDR family oxidoreductase	0	2.87	3.05	5.93	0	0	0.012	2.87	0	1.5e-29
67	Cgl0502	-	iron ABC transporter permease	0	2.44	2.27	4.54	P:GO:0055085; F:GO:0022857; C:GO:0005886; C:GO:0016021	P:transmembrane transport; F:transmembrane transporter activity; C:plasma membrane; C:integral component of membrane	2.2e-05	2.44	0	2.7e-21
68	Cgl1546	pacL	carbonate dehydratase	0	2.31	2.36	4.5	F:GO:0005524; C:GO:0005886; C:GO:0016021	F:ATP binding; C:plasma membrane; C:integral component of membrane	0.0074	2.31	0	6.1e-19
69	Cgl1235	-	transcriptional regulator	0	2.51	2.62	4.36	F:GO:0003677	F:DNA binding	0.00017	2.51	0	9.6e-21
70	Cgl1234	-	HipA-like protein	0	2.55	2.97	4.12	P:GO:0016310; F:GO:0016301	P:phosphorylation; F:kinase activity	0.0033	2.55	0	1.1e-07
71	Cgl2855	-	DUF3367 domain-containing protein	0	2.3	2.38	4.03	F:GO:0016740; C:GO:0016021	F:transferase activity; C:integral component of membrane	0.00011	2.3	0	3.5e-12
72	Cgl1547	-	DUF1990 family protein	2.37	0	2.24	3.99	0	0	9.5e-09	1.86	0	1.1e-13
73	Cgl2698	mesJ	tRNA lysidine(34) synthetase TilS	0	2.13	2.12	3.8	P:GO:0006400; F:GO:0005524; F:GO:0016879; C:GO:0005737	P:tRNA modification; F:ATP binding; F:ligase activity, forming carbon-nitrogen bonds; C:cytoplasm	0.013	2.13	0	5e-11
74	Cgl0906	-	ArsR family transcriptional regulator	0	2.25	2.23	3.73	P:GO:0006355; F:GO:0003700	P:regulation of transcription, DNA-templated; F:DNA-binding transcription factor activity	0.05	2.25	0	9.6e-12
75	Cgl2901	-	CAAX protease	2.02	0	2.17	3.61	P:GO:0071586; F:GO:0004222; C:GO:0016021	P:CAAX-box protein processing; F:metalloendopeptidase activity; C:integral component of membrane	3.1e-06	1.92	0	6.1e-11
76	Cgl0182	tnp2f(ISCg2f)	transposase	0	2.31	2.79	3.45	P:GO:0015074	P:DNA integration	4.1e-05	2.31	0	1.1e-07
77	Cgl2561	-	Hypothetical protein	2.7	0	2.09	3.42	0	0	7.1e-09	1.35	2.6e-15	6.4e-06
78	Cgl2399	-	HNH endonuclease	0	2.26	2.46	3.41	P:GO:0090305; F:GO:0004519	P:nucleic acid phosphodiester bond hydrolysis; F:endonuclease activity	0.00061	2.26	0	1.8e-06
79	Cgl2504	tnp15a(ISCg15a)	transposase	0	2.47	2.57	3.34	0	0	0.001	3.27	0	7.9e-16
80	Cgl1667	-	alpha-(1-2)-phosphatidylinositol mannosyltransferase	0	2.66	2.69	3.31	F:GO:0016757	F:transferase activity, transferring glycosyl groups	0.00056	2.66	0	7.9e-06
81	Cgl2235	-	hypothetical protein	2.21	0	2.11	3.16	0	0	2e-07	1.95	0	1.4e-14
82	Cgl0305	-	putative secreted protein	0	2.47	2.18	3.06	C:GO:0016021	C:integral component of membrane	0.058	2.47	0	4.9e-06
83	Cgl0104	-	DUF202 domain-containing protein	2.37	0	2.11	2.89	F:GO:0047134; C:GO:0016021	F:protein-disulfide reductase activity; C:integral component of membrane	2e-07	1.85	0	5.7e-05
84	Cgl1352	-	putative membrane protein	2.21	0	2.15	2.76	F:GO:0047134; C:GO:0016021	F:protein-disulfide reductase activity; C:integral component of membrane	6.2e-06	1.08	0	0.00028
85	Cgl2486	-	HNH endonuclease	2.35	0	2.34	2.74	P:GO:0090305; F:GO:0003676; F:GO:0004519	P:nucleic acid phosphodiester bond hydrolysis; F:nucleic acid binding; F:endonuclease activity	1.8e-10	1.99	0	1.1e-06
86	Cgl1236	-	spermidine synthase	0	2.57	2.37	2.73	P:GO:0006596; F:GO:0008080	P:polyamine biosynthetic process; F:N-acetyltransferase activity	0.00058	2.57	0	0.00078
87	Cgl0694	prpD1	2-methylcitrate dehydratase	2.1	2.14	0	2.62	P:GO:0006099; P:GO:0019679; F:GO:0003994; F:GO:0047547; F:GO:0047780	P:tricarboxylic acid cycle; P:propionate metabolic process, methylcitrate cycle; F:aconitate hydratase activity; F:2-methylcitrate dehydratase activity; F:citrate dehydratase activity	2e-08	2.14	4.9e-18	2.5e-06
88	Cgl2292	hemN	coproporphyrinogen III oxidase	0	2.14	2.28	2.53	P:GO:0006779; F:GO:0004109; F:GO:0046872; F:GO:0051539; C:GO:0005737	P:porphyrin-containing compound biosynthetic process; F:coproporphyrinogen oxidase activity; F:metal ion binding; F:4 iron, 4 sulfur cluster binding; C:cytoplasm	0.0014	2.14	0	0.0003
89	Cgl0005	-	MULTISPECIES: DUF721 domain-containing protein	0	2.35	2.11	2.52	0	0	0.15	2.35	0	0.00059
90	Cgl2861	-	glycosyl transferase	2.49	0	2.05	2.47	F:GO:0016757	F:transferase activity, transferring glycosyl groups	4.3e-11	1.72	0	0.00013
91	Cgl0146	-	LysE family translocator	2.11	2.19	0	2.25	P:GO:0006865; C:GO:0005886; C:GO:0016021	P:amino acid transport; C:plasma membrane; C:integral component of membrane	5.6e-08	2.19	0	0.00014
92	Cgl3039	-	ABC transporter permease	2.03	2.19	0	2.14	C:GO:0016021	C:integral component of membrane	2.2e-07	2.19	8e-15	0.00044
93	Cgl0010	-	ROK family protein	2.18	2.42	2.36	0	0	0	6.6e-06	2.42	0	1
94	Cgl0011	-	TetR family transcriptional regulator	3.06	2.96	2.98	0	0	0	4.6e-07	2.96	0	0.33
95	Cgl0012	-	CopG family protein	3.13	4.31	4.07	0	0	0	0.00033	4.31	0	0.16
96	Cgl0018	-	cytochrome C biogenesis protein	2.21	2.25	2.28	0	P:GO:0017004; C:GO:0016021	P:cytochrome complex assembly; C:integral component of membrane	1e-05	2.25	0	0.0081
97	Cgl0028	-	metal ABC transporter permease	3.92	2.8	2.94	0	P:GO:0055085; F:GO:0042626; C:GO:0005887; C:GO:0043190	P:transmembrane transport; F:ATPase-coupled transmembrane transporter activity; C:integral component of plasma membrane; C:ATP-binding cassette (ABC) transporter complex	0	2.8	0	0.56
98	Cgl0029	-	ABC transporter ATP-binding protein	4.63	4.08	3.93	0	F:GO:0005524; F:GO:0016887	F:ATP binding; F:ATPase activity	0	4.08	0	0.6
99	Cgl0052	-	MBL fold metallo-hydrolase	2.47	2.84	3.07	0	F:GO:0004416	F:hydroxyacylglutathione hydrolase activity	6.4e-05	2.84	0	0.44
100	Cgl0053	-	sulfite exporter TauE/SafE family protein	2.58	3.3	3.15	0	C:GO:0005886; C:GO:0016021	C:plasma membrane; C:integral component of membrane	4.8e-05	3.3	0	0.82
101	Cgl0079	-	NAD-dependent protein deacetylase	2.35	2.19	2.19	0	F:GO:0016740; F:GO:0070403	F:transferase activity; F:NAD+ binding	5.1e-09	2.19	0	0.015
102	Cgl0081	-	acetyltransferase	2.81	3.52	3.31	0	F:GO:0016740; F:GO:0016787	F:transferase activity; F:hydrolase activity	1.9e-06	3.52	0	0.0074
103	Cgl0111	-	DeoR/GlpR transcriptional regulator	2.24	2.65	2.53	0	P:GO:0006355; F:GO:0003677; F:GO:0003700; F:GO:0016787	P:regulation of transcription, DNA-templated; F:DNA binding; F:DNA-binding transcription factor activity; F:hydrolase activity	1.8e-05	2.65	0	0.045
104	Cgl0167	-	Gfo/Idh/MocA family oxidoreductase	2.51	3.59	3.65	0	F:GO:0050112	F:inositol 2-dehydrogenase activity	0.00022	3.59	0	0.15
105	Cgl0199	-	VOC family protein	2.35	2.55	2.4	0	0	0	2.5e-06	2.55	0	0.077
106	Cgl0228	-	tRNA-specific adenosine deaminase	2.25	3.02	3.04	0	P:GO:0002100; F:GO:0008270; F:GO:0052717	P:tRNA wobble adenosine to inosine editing; F:zinc ion binding; F:tRNA-specific adenosine-34 deaminase activity	0.0002	3.02	0	0.023
107	Cgl0234	-	DUF1611 domain-containing protein	3.54	4.48	4.46	0	0	0	9.2e-07	4.48	0	0.12
108	Cgl0235	-	ABC transporter permease	2.77	3.13	2.88	0	P:GO:0055085; F:GO:0005524; F:GO:0042626; C:GO:0016021	P:transmembrane transport; F:ATP binding; F:ATPase-coupled transmembrane transporter activity; C:integral component of membrane	1.4e-07	3.13	0	0.045
109	Cgl0288	phdD	glutaryl-CoA dehydrogenase	2.05	2.53	2.27	0	F:GO:0004361; F:GO:0050660	F:glutaryl-CoA dehydrogenase activity; F:flavin adenine dinucleotide binding	2.8e-05	2.53	0	0.072
110	Cgl0302	-	type II secretion system F family protein	2.29	2.96	2.82	0	C:GO:0005886; C:GO:0016021	C:plasma membrane; C:integral component of membrane	4.5e-05	2.96	0	0.024
111	Cgl0315	-	AAA family ATPase	2.05	2.17	2.11	0	P:GO:0016310; P:GO:0046940; F:GO:0004017	P:phosphorylation; P:nucleoside monophosphate phosphorylation; F:adenylate kinase activity	8.7e-05	2.17	7.2e-17	0.15
112	Cgl0383	deoC	deoxyribose-phosphate aldolase	2.55	2.13	2.31	0	P:GO:0009264; P:GO:0016052; P:GO:0046386; F:GO:0004139; C:GO:0005737	P:deoxyribonucleotide catabolic process; P:carbohydrate catabolic process; P:deoxyribose phosphate catabolic process; F:deoxyribose-phosphate aldolase activity; C:cytoplasm	1e-09	2.13	0	0.84
113	Cgl0479	gabT	acetylornithine aminotransferase	3.45	3.88	4.07	0	P:GO:0009448; F:GO:0030170; F:GO:0034386	P:gamma-aminobutyric acid metabolic process; F:pyridoxal phosphate binding; F:4-aminobutyrate:2-oxoglutarate transaminase activity	1.2e-06	3.88	0	0.028
114	Cgl0536	-	GNAT family N-acetyltransferase	2.42	2.95	3.31	0	F:GO:0008080	F:N-acetyltransferase activity	3.8e-06	2.95	0	0.031
115	Cgl0549	creF	ferredoxin	2.66	3.26	3.31	0	P:GO:0022900; F:GO:0009055; F:GO:0051537	P:electron transport chain; F:electron transfer activity; F:2 iron, 2 sulfur cluster binding	0.00016	3.26	0	1
116	Cgl0570	-	GNAT family N-acetyltransferase	2.69	3.32	3.19	0	F:GO:0008080	F:N-acetyltransferase activity	8.1e-07	3.32	0	0.017
117	Cgl0571	-	type VII secretion protein EccB	2.37	3	3.12	0	C:GO:0016021	C:integral component of membrane	0.00029	3	0	0.044
118	Cgl0576	-	type VII secretion integral membrane protein EccD	2.37	3.25	3.35	0	P:GO:0006508; F:GO:0004252; C:GO:0005886; C:GO:0016021	P:proteolysis; F:serine-type endopeptidase activity; C:plasma membrane; C:integral component of membrane	0.00053	3.25	0	0.0033
119	Cgl0578	-	type VII secretion-associated protein	2.57	3.21	3.32	0	C:GO:0016021	C:integral component of membrane	0.00011	3.21	0	0.97
120	Cgl0580	-	MULTISPECIES: WXG100 family type VII secretion target	2.17	3.39	3.17	0	0	0	0.0002	3.39	0	0.17
121	Cgl0599	whiB3	WhiB family transcriptional regulator	2.37	2.33	2.4	0	P:GO:0006355; F:GO:0003677; F:GO:0035731; F:GO:0046872; F:GO:0051539; C:GO:0005737	P:regulation of transcription, DNA-templated; F:DNA binding; F:dinitrosyl-iron complex binding; F:metal ion binding; F:4 iron, 4 sulfur cluster binding; C:cytoplasm	2e-06	2.33	0	0.29
122	Cgl0606	-	LysR family transcriptional regulator	2.12	2.2	2.58	0	P:GO:0006355; F:GO:0003700	P:regulation of transcription, DNA-templated; F:DNA-binding transcription factor activity	0.00013	2.2	0	0.0048
123	Cgl0643	-	Hypothetical protein	4.3	5.42	5.37	0	0	0	8e-05	5.42	0	0.5
124	Cgl0667	-	iron chelate uptake ABC transporter family permease subunit	2.31	2.19	2.22	0	P:GO:0055085; F:GO:0022857; C:GO:0005886; C:GO:0016021	P:transmembrane transport; F:transmembrane transporter activity; C:plasma membrane; C:integral component of membrane	7.4e-07	2.19	0	0.016
125	Cgl0682	-	hydrolase	2.04	2.24	2.29	0	F:GO:0016787; C:GO:0005576	F:hydrolase activity; C:extracellular region	3e-05	2.24	0	0.18
126	Cgl0683	-	hypothetical protein	3.68	3.48	3.47	0	0	0	6.9e-14	3.48	0	0.14
127	Cgl0690	-	thioredoxin	2.3	3.08	3.27	0	0	0	0.00058	3.08	0	0.0073
128	Cgl0699	-	Hypothetical protein	2.4	2.27	2.36	0	0	0	8.1e-11	2.27	0	0.0011
129	Cgl0718	tnp5a(ISCg5a)	transposase	0	2.95	3.06	0	P:GO:0015074; P:GO:0032196; F:GO:0003676	P:DNA integration; P:transposition; F:nucleic acid binding	0.0023	2.95	0	0.17
130	Cgl0719	-	3-oxoacyl-ACP reductase	3	3.96	3.75	0	F:GO:0004316; F:GO:0102131; F:GO:0102132	F:3-oxoacyl-[acyl-carrier-protein] reductase (NADPH) activity; F:3-oxo-glutaryl-[acp] methyl ester reductase activity; F:3-oxo-pimeloyl-[acp] methyl ester reductase activity	8.4e-06	3.96	0	0.0054
131	Cgl0852	-	HNH endonuclease	2.67	3.05	3.06	0	P:GO:0090305; F:GO:0004519	P:nucleic acid phosphodiester bond hydrolysis; F:endonuclease activity	3.5e-08	3.05	0	0.047
132	Cgl0865	-	No significant database matches	2.21	3.51	3.19	0	0	0	0.00011	3.51	0	0.15
133	Cgl0968	lysI	lysine transporter	2.15	2.47	2.51	0	P:GO:0006865; P:GO:0055085; F:GO:0022857; C:GO:0005886; C:GO:0016021	P:amino acid transport; P:transmembrane transport; F:transmembrane transporter activity; C:plasma membrane; C:integral component of membrane	3.9e-05	2.47	0	0.95
134	Cgl0998	-	aminotransferase class IV	2.15	2.91	2.79	0	F:GO:0008483; F:GO:0008696	F:transaminase activity; F:4-amino-4-deoxychorismate lyase activity	0.00039	2.91	0	0.017
135	Cgl1023	-	MFS transporter	5.18	5.61	5.4	0	P:GO:0055085; F:GO:0022857; C:GO:0016021	P:transmembrane transport; F:transmembrane transporter activity; C:integral component of membrane	3e-06	5.61	0	1
136	Cgl1070	-	ADP-ribose pyrophosphatase	3.2	2.45	2.45	0	F:GO:0016787	F:hydrolase activity	2.4e-21	2.45	0	0.0088
137	Cgl1078	-	ECF transporter S component	3.55	3.65	3.49	0	C:GO:0016021	C:integral component of membrane	1.5e-14	3.65	0	0.019
138	Cgl1079	-	ABC transporter ATP-binding protein	3.18	3.86	3.75	0	F:GO:0005524; F:GO:0016887	F:ATP binding; F:ATPase activity	5.5e-06	3.86	0	0.0012
139	Cgl1080	-	ABC-type cobalt transport system, permease component CbiQ	4.78	5.77	5.59	0	C:GO:0016021	C:integral component of membrane	7.4e-08	5.77	0	0.12
140	Cgl1158	-	phenol 2-monooxygenase	2.39	2.93	2.86	0	F:GO:0071949	F:FAD binding	8.3e-05	2.93	0	0.54
141	Cgl1168	lipP	esterase	2.9	3.21	3.44	0	F:GO:0016787; C:GO:0016021	F:hydrolase activity; C:integral component of membrane	1.2e-05	3.21	0	0.0062
142	Cgl1169	atoE	short-chain dehydrogenase	4.78	5.06	5.11	0	F:GO:0016787; C:GO:0016021	F:hydrolase activity; C:integral component of membrane	4.6e-09	5.06	0	0.16
143	Cgl1176	ctpC	HAD family hydrolase	2.33	3.21	3.28	0	P:GO:0070574; F:GO:0005524; F:GO:0008551; F:GO:0019829; F:GO:0046872; C:GO:0005886; C:GO:0016021	P:cadmium ion transmembrane transport; F:ATP binding; F:P-type cadmium transporter activity; F:ATPase-coupled cation transmembrane transporter activity; F:metal ion binding; C:plasma membrane; C:integral component of membrane	0.00059	3.21	0	0.13
144	Cgl1177	-	GTP pyrophosphokinase	3.77	3.61	4.04	0	P:GO:0015969; P:GO:0016310; F:GO:0008728; F:GO:0016301	P:guanosine tetraphosphate metabolic process; P:phosphorylation; F:GTP diphosphokinase activity; F:kinase activity	8.5e-07	3.61	0	0.66
145	Cgl1220	ssuD1	alkanesulfonate monooxygenase	0	3.82	3.51	0	F:GO:0008726	F:alkanesulfonate monooxygenase activity	0.0021	3.82	0	0.16
146	Cgl1221	ssuC	ABC transporter permease	3.48	4.56	4.7	0	P:GO:0055085; C:GO:0005886; C:GO:0016021	P:transmembrane transport; C:plasma membrane; C:integral component of membrane	8.5e-05	4.56	0	0.41
147	Cgl1222	ssuB	sulfonate ABC transporter ATP-binding protein	3.09	3.49	3.53	0	P:GO:0098656; F:GO:0005524; F:GO:0008509; F:GO:0016887; C:GO:0005886	P:anion transmembrane transport; F:ATP binding; F:anion transmembrane transporter activity; F:ATPase activity; C:plasma membrane	2e-06	3.49	0	0.66
148	Cgl1256	-	amino acid acetyltransferase	2.23	2.48	2.86	0	F:GO:0008080	F:N-acetyltransferase activity	0.00011	2.48	0	0.34
149	Cgl1277	-	nitrate ABC transporter substrate-binding protein	2.31	2.96	3.29	0	C:GO:0016021	C:integral component of membrane	0.00018	2.96	0	0.058
150	Cgl1297	-	TetR/AcrR family transcriptional regulator	3.77	4.47	4.65	0	F:GO:0003677	F:DNA binding	8.5e-07	4.47	0	0.49
151	Cgl1298	-	SRPBCC domain-containing protein	3.26	4.28	4.2	0	0	0	0.00027	4.28	0	0.15
152	Cgl1299	-	SRPBCC family protein	2.89	2.6	2.84	0	0	0	4.5e-10	2.6	0	0.018
153	Cgl1301	-	Hypothetical membrane protein	4.65	4.25	4.52	0	C:GO:0016021	C:integral component of membrane	4.6e-12	4.25	0	0.13
154	Cgl1302	-	TetR/AcrR family transcriptional regulator	3.36	2.72	3.43	0	0	0	8e-05	2.72	0	0.85
155	Cgl1305	thiC	phosphomethylpyrimidine synthase ThiC	2.63	3.43	3.29	0	P:GO:0009228; P:GO:0009229; F:GO:0008270; F:GO:0016830; F:GO:0051539	P:thiamine biosynthetic process; P:thiamine diphosphate biosynthetic process; F:zinc ion binding; F:carbon-carbon lyase activity; F:4 iron, 4 sulfur cluster binding	5.1e-05	3.43	0	0.071
156	Cgl1341	tnp23a(ISCg23a)	IS3 family transposase	3	3.55	3.24	0	P:GO:0006313; P:GO:0015074; F:GO:0003677; F:GO:0004803	P:transposition, DNA-mediated; P:DNA integration; F:DNA binding; F:transposase activity	5.6e-08	3.55	0	0.0076
157	Cgl1383	ugpA	glycerol-3-phosphate ABC transporter permease	5.6	2.53	3.31	0	P:GO:0055085; C:GO:0005886; C:GO:0016021	P:transmembrane transport; C:plasma membrane; C:integral component of membrane	0	2.53	0	1
158	Cgl1385	ugpB	ABC transporter substrate-binding protein	3.97	2.48	2.52	0	0	0	0	2.48	0	0.056
159	Cgl1386	ugpC	sugar ABC transporter ATP-binding protein	3.71	2.89	2.95	0	F:GO:0005524; F:GO:0016887	F:ATP binding; F:ATPase activity	5.2e-19	2.89	0	0.0044
160	Cgl1420	-	ABC transporter ATPase	2.33	2.47	2.75	0	F:GO:0005524	F:ATP binding	0.00035	2.47	0	0.0082
161	Cgl1432	-	ABC transporter ATP-binding protein	2.99	2.95	3.16	0	P:GO:0055085; F:GO:0005524; F:GO:0042626; C:GO:0016021	P:transmembrane transport; F:ATP binding; F:ATPase-coupled transmembrane transporter activity; C:integral component of membrane	1.7e-09	2.95	0	0.064
162	Cgl1435	-	hypothetical protein C624_07975	2.23	2.62	2.4	0	0	0	9.3e-06	2.62	0	0.023
163	Cgl1436	-	sodium:proton antiporter	2.13	2.41	2.27	0	P:GO:0006814; P:GO:1902600; F:GO:0015299; C:GO:0016021	P:sodium ion transport; P:proton transmembrane transport; F:solute:proton antiporter activity; C:integral component of membrane	2.2e-05	2.41	0	0.055
164	Cgl1458	pctD	phosphonate ABC transporter, permease protein PhnE	3.1	4.34	4.22	0	P:GO:0015716; P:GO:0055085; C:GO:0005887	P:organic phosphonate transport; P:transmembrane transport; C:integral component of plasma membrane	0.00036	4.34	0	0.13
165	Cgl1459	pctC	phosphonate ABC transporter, permease protein PhnE	0	3.24	3.02	0	P:GO:0015716; P:GO:0055085; C:GO:0005887	P:organic phosphonate transport; P:transmembrane transport; C:integral component of plasma membrane	0.0011	3.24	0	0.36
166	Cgl1460	pctB	phosphonate ABC transporter ATP-binding protein	2.52	3.38	3.38	0	P:GO:0015716; F:GO:0005524; F:GO:0015416; C:GO:0005886	P:organic phosphonate transport; F:ATP binding; F:ABC-type phosphonate transporter activity; C:plasma membrane	0.0004	3.38	0	0.033
167	Cgl1461	pctA	ABC transporter substrate-binding protein	2.4	2.18	2.43	0	P:GO:0055085; C:GO:0043190	P:transmembrane transport; C:ATP-binding cassette (ABC) transporter complex	8.2e-05	2.18	9.6e-18	0.084
168	Cgl1462	pgp1	HAD family hydrolase	3.83	2.2	2.54	0	F:GO:0016787	F:hydrolase activity	0	2.2	0	0.013
169	Cgl1481	lip	triacylglycerol lipase	3.26	4.24	4.49	0	P:GO:0016042; F:GO:0004806	P:lipid catabolic process; F:triglyceride lipase activity	2.5e-05	4.24	0	0.001
170	Cgl1525	tetA	ABC transporter ATP-binding protein	2.61	2.59	2.58	0	P:GO:0055085; F:GO:0005524; F:GO:0042626; C:GO:0016021	P:transmembrane transport; F:ATP binding; F:ATPase-coupled transmembrane transporter activity; C:integral component of membrane	7.6e-08	2.59	0	0.47
171	Cgl1531	-	TVP38/TMEM64 family protein	2.7	2.54	2.84	0	C:GO:0005886; C:GO:0016021	C:plasma membrane; C:integral component of membrane	5.4e-08	2.54	0	0.027
172	Cgl1555	-	putative membrane protein	0	3.1	3.45	0	P:GO:0008152; F:GO:0052794; F:GO:0052795; F:GO:0052796; C:GO:0016021	P:metabolic process; F:exo-alpha-(2->3)-sialidase activity; F:exo-alpha-(2->6)-sialidase activity; F:exo-alpha-(2->8)-sialidase activity; C:integral component of membrane	0.0033	3.1	0	0.16
173	Cgl1570	-	helicase	2.58	2.2	2.36	0	F:GO:0003677; F:GO:0004386; F:GO:0005524	F:DNA binding; F:helicase activity; F:ATP binding	4.1e-12	2.2	0	0.0021
174	Cgl1626	-	ABC transporter permease	2.4	3.09	3.12	0	P:GO:0055085; F:GO:0022857; C:GO:0005886; C:GO:0016021	P:transmembrane transport; F:transmembrane transporter activity; C:plasma membrane; C:integral component of membrane	0.00023	3.09	0	0.15
175	Cgl1627	-	ABC transporter substrate-binding protein	2.29	2.57	2.62	0	0	0	4.7e-05	2.57	0	0.46
176	Cgl1960	-	cobalt ABC transporter permease	2.43	2.27	2.3	0	C:GO:0016021	C:integral component of membrane	3.1e-07	2.27	0	0.1
177	Cgl2012	-	ABC transporter ATP-binding protein	2.71	2.3	2.07	0	F:GO:0005524; F:GO:0016887	F:ATP binding; F:ATPase activity	1.1e-11	2.3	0	0.32
178	Cgl2029	-	DNA-protecting protein DprA	2.68	2.78	2.99	0	P:GO:0009294	P:DNA mediated transformation	1.1e-05	2.78	0	0.16
179	Cgl2030	-	ATPase	2.24	2.45	2.85	0	0	0	0.00064	2.45	0	0.46
180	Cgl2039	thiO	glycine oxidase ThiO	2.01	2.62	2.38	0	P:GO:0009229; F:GO:0016491; F:GO:0050660	P:thiamine diphosphate biosynthetic process; F:oxidoreductase activity; F:flavin adenine dinucleotide binding	0.00017	2.62	0	0.0063
181	Cgl2044	-	LacI family transcriptional regulator	2.47	2.67	2.92	0	P:GO:0006355; F:GO:0003677	P:regulation of transcription, DNA-templated; F:DNA binding	3.4e-05	2.67	0	0.0011
182	Cgl2085	-	putative membrane protein	2.73	3.58	3.62	0	F:GO:0047134; C:GO:0016021	F:protein-disulfide reductase activity; C:integral component of membrane	8.2e-05	3.58	0	0.15
183	Cgl2086	-	putative membrane protein	2.96	3.37	3.37	0	F:GO:0047134; C:GO:0016021	F:protein-disulfide reductase activity; C:integral component of membrane	7.4e-08	3.37	0	0.4
184	Cgl2110	idhA3	dehydrogenase	2.11	2.61	2.39	0	F:GO:0050112	F:inositol 2-dehydrogenase activity	0.00015	2.61	0	0.14
185	Cgl2146	-	MerR family transcriptional regulator	3.37	3.89	3.92	0	P:GO:0006355; F:GO:0003677	P:regulation of transcription, DNA-templated; F:DNA binding	3.6e-07	3.89	0	0.0039
186	Cgl2202	-	Hypothetical protein	0	3.73	3.91	0	0	0	0.0084	3.73	0	0.26
187	Cgl2223	-	MFS transporter	2.67	2.8	3.15	0	P:GO:0055085; F:GO:0022857; C:GO:0016021	P:transmembrane transport; F:transmembrane transporter activity; C:integral component of membrane	2.3e-05	2.8	0	0.048
188	Cgl2265	phoD	phosphodiesterase	2.67	3.53	3.37	0	P:GO:0016311; F:GO:0003993; F:GO:0004035; F:GO:0046872	P:dephosphorylation; F:acid phosphatase activity; F:alkaline phosphatase activity; F:metal ion binding	2.5e-05	3.53	0	0.022
189	Cgl2306	-	hypothetical protein	2.54	2.17	2.41	0	0	0	1.6e-08	2.17	0	0.2
190	Cgl2307	-	DUF3558 domain-containing protein	0	2.97	3.23	0	0	0	0.0018	2.97	0	0.23
191	Cgl2337	-	hypothetical protein	2.05	2.47	2.54	0	0	0	0.00029	2.47	0	1
192	Cgl2347	-	competence protein ComE	2.17	2.21	2.55	0	C:GO:0005886; C:GO:0016021	C:plasma membrane; C:integral component of membrane	0.00014	2.21	0	0.012
193	Cgl2383	vanA	benzoate 1,2-dioxygenase large subunit	2.11	2.24	2.41	0	P:GO:0032259; P:GO:0070988; F:GO:0008168; F:GO:0018489; F:GO:0046872; F:GO:0051213; F:GO:0051537	P:methylation; P:demethylation; F:methyltransferase activity; F:vanillate monooxygenase activity; F:metal ion binding; F:dioxygenase activity; F:2 iron, 2 sulfur cluster binding	8.5e-06	2.24	0	0.015
194	Cgl2404	benA	benzoate 1,2-dioxygenase large subunit	3.47	3.93	3.99	0	P:GO:0044237; F:GO:0005506; F:GO:0018623; F:GO:0051537	P:cellular metabolic process; F:iron ion binding; F:benzoate 1,2-dioxygenase activity; F:2 iron, 2 sulfur cluster binding	1.4e-09	3.93	0	0.01
195	Cgl2406	benC	benzene 1,2-dioxygenase	2.88	4.07	3.87	0	P:GO:0022900; F:GO:0003677; F:GO:0009055; F:GO:0046872; F:GO:0051213; F:GO:0051537	P:electron transport chain; F:DNA binding; F:electron transfer activity; F:metal ion binding; F:dioxygenase activity; F:2 iron, 2 sulfur cluster binding	9.8e-05	4.07	0	0.48
196	Cgl2407	benD	1,6-dihydroxycyclohexa-2,4-diene-1-carboxylate dehydrogenase	2.67	3.68	3.82	0	F:GO:0047116	F:1,6-dihydroxycyclohexa-2,4-diene-1-carboxylate dehydrogenase activity	0.00015	3.68	0	0.51
197	Cgl2420	tnp12b(ISCg12a)	transposase	3.41	3.44	3.24	0	P:GO:0006313; F:GO:0003677; F:GO:0004803	P:transposition, DNA-mediated; F:DNA binding; F:transposase activity	5.7e-19	3.44	0	0.046
198	Cgl2424	-	DUF418 domain-containing protein	2.75	3.28	3.31	0	C:GO:0016021	C:integral component of membrane	1.1e-06	3.28	0	0.044
199	Cgl2452	-	alkaline phosphatase family protein	2.14	2.67	2.52	0	P:GO:0006506; F:GO:0016772	P:GPI anchor biosynthetic process; F:transferase activity, transferring phosphorus-containing groups	1.2e-05	2.67	0	0.15
200	Cgl2455	-	single-stranded DNA-binding protein	3.24	3.91	3.95	0	F:GO:0003697	F:single-stranded DNA binding	2.8e-06	3.91	0	0.62
201	Cgl2502	-	hypothetical protein cgp_2755	3.38	2.32	2.52	0	0	0	2.2e-21	2.32	0	0.0058
202	Cgl2524	-	Hypothetical protein	3.02	2.92	3.22	0	0	0	3.1e-09	2.92	0	0.0054
203	Cgl2568	-	alpha/beta hydrolase	2.31	2.92	2.66	0	F:GO:0004622; F:GO:0102545	F:lysophospholipase activity; F:phosphatidyl phospholipase B activity	4.9e-06	2.92	0	1
204	Cgl2594	-	DUF2334 domain-containing protein	2.28	3.36	3.21	0	P:GO:0005975; F:GO:0003824	P:carbohydrate metabolic process; F:catalytic activity	0.00061	3.36	0	0.4
205	Cgl2603	-	peptide MFS transporter	3.15	2.85	2.82	0	P:GO:0006857; P:GO:0055085; F:GO:1904680; C:GO:0005886; C:GO:0016021	P:oligopeptide transport; P:transmembrane transport; F:peptide transmembrane transporter activity; C:plasma membrane; C:integral component of membrane	1.2e-11	2.85	0	0.36
206	Cgl2604	bioA	adenosylmethionine--8-amino-7-oxononanoate transaminase	2.69	2.76	2.79	0	P:GO:0009102; F:GO:0004015; F:GO:0030170; C:GO:0005737	P:biotin biosynthetic process; F:adenosylmethionine-8-amino-7-oxononanoate transaminase activity; F:pyridoxal phosphate binding; C:cytoplasm	1.1e-07	2.76	0	0.94
207	Cgl2611	-	MFS transporter	3.05	3.36	3.39	0	P:GO:0055085; F:GO:0022857; C:GO:0016021	P:transmembrane transport; F:transmembrane transporter activity; C:integral component of membrane	8.7e-07	3.36	0	0.26
208	Cgl2784	-	potassium transporter	2.28	3.09	3.02	0	0	0	9.4e-05	3.09	0	0.059
209	Cgl2822	-	hypothetical protein AKL15_13420	3.27	2.49	2.57	0	0	0	1e-21	2.49	0	0.46
210	Cgl2850	-	HtaA domain-containing protein	3.55	3.14	3.01	0	0	0	2.6e-16	3.14	0	0.044
211	Cgl2858	-	acyltransferase	2.19	2.58	2.56	0	F:GO:0016747; C:GO:0016021	F:transferase activity, transferring acyl groups other than amino-acyl groups; C:integral component of membrane	1.2e-05	2.58	0	0.036
212	Cgl2876	-	HNH endonuclease	2.59	2.66	2.63	0	P:GO:0090305; F:GO:0003676; F:GO:0004519	P:nucleic acid phosphodiester bond hydrolysis; F:nucleic acid binding; F:endonuclease activity	4.4e-08	2.66	0	0.084
213	Cgl2877	-	hypothetical protein	2.23	2.32	2.38	0	0	0	1.2e-06	2.32	0	0.058
214	Cgl2904	-	carboxymuconolactone decarboxylase	2.57	2.44	2.95	0	P:GO:0098869; F:GO:0051920	P:cellular oxidant detoxification; F:peroxiredoxin activity	2.9e-08	2.44	0	0.2
215	Cgl2928	-	LysR family transcriptional regulator	2.57	3.03	3.1	0	P:GO:0006355; F:GO:0003700	P:regulation of transcription, DNA-templated; F:DNA-binding transcription factor activity	2.2e-06	3.03	0	0.52
216	Cgl2929	-	MFS transporter	2.19	2.45	2.48	0	P:GO:0055085; F:GO:0022857; C:GO:0016021	P:transmembrane transport; F:transmembrane transporter activity; C:integral component of membrane	2e-05	2.45	0	0.04
217	Cgl2930	-	cupredoxin domain-containing protein	2.11	3.02	3.04	0	C:GO:0016021	C:integral component of membrane	0.00042	3.02	0	0.0017
218	Cgl3014	-	VWA domain-containing protein	3.11	3.01	3.36	0	C:GO:0016021	C:integral component of membrane	3.8e-08	3.01	0	0.067
219	Cgl3026	nahG	3-hydroxybenzoate 6-hydroxylase	2.69	3.22	3.07	0	P:GO:0019439; F:GO:0018669; F:GO:0071949	P:aromatic compound catabolic process; F:3-hydroxybenzoate 6-monooxygenase activity; F:FAD binding	5e-06	3.22	0	0.25
220	Cgl3051	-	SDR family oxidoreductase	2.41	3.39	3.33	0	P:GO:0055114; F:GO:0004316; F:GO:0016491; F:GO:0102131; F:GO:0102132	P:obsolete oxidation-reduction process; F:3-oxoacyl-[acyl-carrier-protein] reductase (NADPH) activity; F:oxidoreductase activity; F:3-oxo-glutaryl-[acp] methyl ester reductase activity; F:3-oxo-pimeloyl-[acp] methyl ester reductase activity	0.00015	3.39	0	0.083
221	Cgl3087	-	putative secreted protein	2.25	2.38	2.35	0	C:GO:0016021	C:integral component of membrane	3.5e-07	2.38	0	0.013
222	Cgl3089	sigM	RNA polymerase sigma factor SigE	2.35	2.65	2.55	0	P:GO:2000142; F:GO:0003677; F:GO:0016987	P:regulation of DNA-templated transcription, initiation; F:DNA binding; F:sigma factor activity	2.3e-06	2.65	0	0.0015
223	Cgl3062	idhA1	inositol 2-dehydrogenase	0	3.42	3.12	0	F:GO:0050112	F:inositol 2-dehydrogenase activity	0.0029	3.42	0	0.43
224	Cgl3063	idhA2	dehydrogenase	0	3.27	3.08	0	F:GO:0050112	F:inositol 2-dehydrogenase activity	0.0054	3.27	0	0.0044
225	Cgl0787	pdxR	GntR family transcriptional regulator	0	2.76	2.89	0	P:GO:0006355; F:GO:0003677; F:GO:0003700; F:GO:0008483	P:regulation of transcription, DNA-templated; F:DNA binding; F:DNA-binding transcription factor activity; F:transaminase activity	0.0054	2.76	0	0.42
226	Cgl1274	-	ABC transporter ATP-binding protein	0	2.62	2.77	0	P:GO:1902358; F:GO:0005524; F:GO:0015419	P:sulfate transmembrane transport; F:ATP binding; F:ABC-type sulfate transporter activity	0.03	2.62	3.8e-15	0.24
227	Cgl2031	-	YraN family protein	0	2.14	2.6	0	P:GO:0090305; F:GO:0003676; F:GO:0004519	P:nucleic acid phosphodiester bond hydrolysis; F:nucleic acid binding; F:endonuclease activity	0.0044	2.14	1.1e-16	1
228	Cgl2777	cmr	multidrug efflux MFS transporter Cmr	0	0	2.14	5.88	P:GO:0055085; F:GO:0022857; C:GO:0016021	P:transmembrane transport; F:transmembrane transporter activity; C:integral component of membrane	0.34	0.05	0	0
229	Cgl2775	sseA1	sulfurtransferase	0	0	2.87	5.57	F:GO:0004792	F:thiosulfate sulfurtransferase activity	0.0053	1.27	0	0
230	Cgl2284	recO	DNA repair protein RecO	0	0	2.26	5.47	P:GO:0006281; P:GO:0006310	P:DNA repair; P:DNA recombination	0.052	1.52	0	0
231	Cgl0501	-	iron ABC transporter permease	0	0	2.18	4.08	P:GO:0055085; F:GO:0022857; C:GO:0005886; C:GO:0016021	P:transmembrane transport; F:transmembrane transporter activity; C:plasma membrane; C:integral component of membrane	3.7e-05	1.81	0	1.2e-19
232	Cgl0318	bglS	beta-glucosidase	0	0	2.19	3.73	P:GO:0005975; F:GO:0004553	P:carbohydrate metabolic process; F:hydrolase activity, hydrolyzing O-glycosyl compounds	0.0072	1.6	0	8.3e-10
233	Cgl1025	xseA	exodeoxyribonuclease VII large subunit	0	0	2.24	3.69	P:GO:0006308; P:GO:0090305; F:GO:0003676; F:GO:0008855; C:GO:0005737; C:GO:0009318	P:DNA catabolic process; P:nucleic acid phosphodiester bond hydrolysis; F:nucleic acid binding; F:exodeoxyribonuclease VII activity; C:cytoplasm; C:exodeoxyribonuclease VII complex	0.02	1.91	0	9.8e-11
234	Cgl2144	dinP	DNA polymerase IV	0	0	2.18	3.51	P:GO:0006261; P:GO:0006281; P:GO:0071897; F:GO:0000287; F:GO:0003684; F:GO:0003887; C:GO:0005737	P:DNA-dependent DNA replication; P:DNA repair; P:DNA biosynthetic process; F:magnesium ion binding; F:damaged DNA binding; F:DNA-directed DNA polymerase activity; C:cytoplasm	0.0026	1.97	0	5.2e-10
235	Cgl2247	-	MULTISPECIES: hypothetical protein	2.78	0	0	3.49	C:GO:0016021	C:integral component of membrane	1e-08	1.3	8.2e-11	7.5e-06
236	Cgl1422	-	segregation and condensation protein A	0	0	2.05	3.44	P:GO:0007059	P:chromosome segregation	0.036	1.4	3.6e-16	5.5e-07
237	Cgl2480	-	putative membrane protein	0	0	2.18	3.22	F:GO:0047134; C:GO:0016021	F:protein-disulfide reductase activity; C:integral component of membrane	0.0068	1.84	2.4e-17	4.7e-05
238	Cgl0472	-	FAD-linked oxidoreductase	0	0	2.31	3.01	F:GO:0016628; F:GO:0071949	F:oxidoreductase activity, acting on the CH-CH group of donors, NAD or NADP as acceptor; F:FAD binding	0.012	1.98	0	2.3e-07
239	Cgl0944	-	MFS transporter	0	2.04	2.23	2.96	P:GO:0055085; F:GO:0022857; C:GO:0016021	P:transmembrane transport; F:transmembrane transporter activity; C:integral component of membrane	0.055	2.04	0	7.1e-06
240	Cgl2943	uspA3	universal stress protein	0	3.28	0	2.8	0	0	5e-05	3.28	2.2e-06	0
241	Cgl2535	-	fructosamine kinase	0	2.17	0	2.79	P:GO:0016310; F:GO:0016301	P:phosphorylation; F:kinase activity	0.27	2.17	2.4e-09	2e-43
242	Cgl2112	-	ABC transporter ATP-binding protein	0	2.11	2.25	2.71	F:GO:0005524; F:GO:0016887	F:ATP binding; F:ATPase activity	0.0023	2.11	0	0.00062
243	Cgl2749	-	membrane protein	0	2.09	2.16	2.71	C:GO:0016021	C:integral component of membrane	0.0074	2.09	0	0.0001
244	Cgl0924	mmpL2	multidrug RND transporter	0	0	2.03	2.45	C:GO:0005886; C:GO:0016021	C:plasma membrane; C:integral component of membrane	0.0043	1.96	0	0.00062
245	Cgl2551	-	sodium:proton antiporter	3.02	0	0	2.43	P:GO:0015810; P:GO:0015813; F:GO:0015293; C:GO:0016021	P:aspartate transmembrane transport; P:L-glutamate transmembrane transport; F:symporter activity; C:integral component of membrane	0	0.7	3e-06	1.1e-11
246	Cgl0807	-	siderophore-interacting protein	2.43	0	0	2.35	F:GO:0016491	F:oxidoreductase activity	4.8e-13	1.44	3.9e-14	2e-05
247	Cgl0015	-	YeiH family putative sulfate export transporter	2.06	2.07	2.2	0	C:GO:0005886; C:GO:0016021	C:plasma membrane; C:integral component of membrane	2.7e-05	2.07	0	0.75
248	Cgl0021	-	Zn-dependent protease	0	2.19	2.07	0	P:GO:0006508; F:GO:0004222; F:GO:0046872; C:GO:0016021	P:proteolysis; F:metalloendopeptidase activity; F:metal ion binding; C:integral component of membrane	0.0042	2.19	0	0.56
249	Cgl0022	-	bifunctional metallophosphatase/5'-nucleotidase	0	2.29	2.42	0	P:GO:0009166; P:GO:0016311; F:GO:0000166; F:GO:0008253; C:GO:0016020	P:nucleotide catabolic process; P:dephosphorylation; F:nucleotide binding; F:5'-nucleotidase activity; C:membrane	0.00018	2.29	0	1
250	Cgl0026	-	putative secreted protein	4.71	2.12	2.06	0	0	0	0	2.12	0	1
251	Cgl0054	-	sulfurtransferase	0	2.33	2.42	0	F:GO:0016740	F:transferase activity	0.0016	2.33	0	1
252	Cgl0075	-	MFS transporter	0	2.35	2.46	0	P:GO:0055085; F:GO:0022857; C:GO:0016021	P:transmembrane transport; F:transmembrane transporter activity; C:integral component of membrane	5.7e-05	2.35	0	0.43
253	Cgl0138	-	TSUP family transporter	0	2.74	2.67	0	C:GO:0005886; C:GO:0016021	C:plasma membrane; C:integral component of membrane	0.0011	2.74	0	0.55
254	Cgl0166	-	MFS transporter	0	2.32	2.36	0	P:GO:0055085; F:GO:0022857; C:GO:0016021	P:transmembrane transport; F:transmembrane transporter activity; C:integral component of membrane	0.00065	2.32	0	0.74
255	Cgl0213	modB	molybdenum ABC transporter permease	0	2.18	2.3	0	P:GO:1902358; F:GO:0015419; C:GO:0005886; C:GO:0016021	P:sulfate transmembrane transport; F:ABC-type sulfate transporter activity; C:plasma membrane; C:integral component of membrane	0.00038	2.18	0	1
256	Cgl0262	arsC1	ACR3 family arsenite efflux transporter	2.18	0	2.16	0	P:GO:0015698; P:GO:0055085; F:GO:0015103; F:GO:0015297; C:GO:0005886; C:GO:0016021	P:inorganic anion transport; P:transmembrane transport; F:inorganic anion transmembrane transporter activity; F:antiporter activity; C:plasma membrane; C:integral component of membrane	0.00023	1.72	1.9e-14	0.19
257	Cgl0287	phdC	amidohydrolase	0	2.63	2.64	0	F:GO:0016787; F:GO:0016831	F:hydrolase activity; F:carboxy-lyase activity	0.021	2.63	0	0.01
258	Cgl0306	-	putative secreted protein	0	2.21	2.07	0	C:GO:0016021	C:integral component of membrane	0.0074	2.21	0	0.06
259	Cgl0336	-	iron siderophore-binding protein	2.04	0	2.19	0	0	0	0.00016	1.97	0	0.3
260	Cgl0392	-	HtaA domain-containing protein	0	2.53	2.56	0	P:GO:0009432; C:GO:0016021	P:SOS response; C:integral component of membrane	0.0021	2.53	0	0.14
261	Cgl0415	-	phosphoserine phosphatase	0	2.14	2.25	0	C:GO:0016021	C:integral component of membrane	1.1e-05	2.14	0	0.78
262	Cgl0416	-	glutaredoxin family protein	2.13	0	2.01	0	0	0	1.7e-08	1.51	0	0.029
263	Cgl0450	menE	O-succinylbenzoic acid--CoA ligase	0	2.27	2.27	0	F:GO:0008756	F:o-succinylbenzoate-CoA ligase activity	0.0039	2.27	0	0.32
264	Cgl0451	-	DoxX family protein	0	2.4	2.44	0	F:GO:0016874; C:GO:0016021	F:ligase activity; C:integral component of membrane	0.012	2.4	0	0.63
265	Cgl0452	-	aldehyde dehydrogenase (NADP(+))	0	2.6	2.52	0	F:GO:0047533	F:2,5-dioxovalerate dehydrogenase (NADP+) activity	0.00064	2.6	0	0.26
266	Cgl0466	menC	O-succinylbenzoate synthase	0	2.36	2.34	0	P:GO:0009234; F:GO:0000287; F:GO:0043748	P:menaquinone biosynthetic process; F:magnesium ion binding; F:O-succinylbenzoate synthase activity	0.0024	2.36	0	0.0024
267	Cgl0480	gabD2	NAD-dependent succinate-semialdehyde dehydrogenase	0	2.75	2.69	0	F:GO:0008911	F:lactaldehyde dehydrogenase activity	0.00055	2.75	0	0.066
268	Cgl0481	-	amino acid permease	0	2.22	2.25	0	P:GO:0003333; C:GO:0005886; C:GO:0016021	P:amino acid transmembrane transport; C:plasma membrane; C:integral component of membrane	0.0014	2.22	0	0.1
269	Cgl0499	-	hypothetical protein	2.08	0	2.14	0	0	0	4.7e-06	1.51	0	0.0086
270	Cgl0531	-	ECF transporter S component	0	2.79	2.76	0	P:GO:0055085; F:GO:0022857; C:GO:0016021	P:transmembrane transport; F:transmembrane transporter activity; C:integral component of membrane	0.1	2.79	0	0.22
271	Cgl0547	creD	HD domain-containing protein	0	2.54	2.42	0	F:GO:0016787	F:hydrolase activity	0.004	2.54	0	0.06
272	Cgl0550	creG	dehydrogenase	0	2.77	2.62	0	F:GO:0004316; F:GO:0102131; F:GO:0102132	F:3-oxoacyl-[acyl-carrier-protein] reductase (NADPH) activity; F:3-oxo-glutaryl-[acp] methyl ester reductase activity; F:3-oxo-pimeloyl-[acp] methyl ester reductase activity	0.00056	2.77	0	0.042
273	Cgl0569	-	GNAT family N-acetyltransferase	0	2.49	2.33	0	F:GO:0008080	F:N-acetyltransferase activity	1	2.49	0	0.0064
274	Cgl0579	-	WXG100 family type VII secretion target	0	2.5	2.53	0	0	0	6.2e-05	2.5	0	0.29
275	Cgl0596	-	Hypothetical protein	0	2.29	2.39	0	0	0	1.3e-05	2.29	0	1
276	Cgl0638	dnaE2	error-prone DNA polymerase	0	2.7	2.64	0	P:GO:0006260; P:GO:0006281; P:GO:0009432; P:GO:0071897; P:GO:0090305; F:GO:0003887; F:GO:0008408; C:GO:0005737	P:DNA replication; P:DNA repair; P:SOS response; P:DNA biosynthetic process; P:nucleic acid phosphodiester bond hydrolysis; F:DNA-directed DNA polymerase activity; F:3'-5' exonuclease activity; C:cytoplasm	0.00017	2.7	0	0.046
277	Cgl0675	-	iron-dicitrate transporter ATP-binding subunit	0	2.21	2.08	0	F:GO:0005524	F:ATP binding	0.0038	2.21	2.2e-16	0.98
278	Cgl0814	-	aminotransferase	2.36	0	2.28	0	P:GO:0009058; P:GO:0097052; F:GO:0016212; F:GO:0030170	P:biosynthetic process; P:L-kynurenine metabolic process; F:kynurenine-oxoglutarate transaminase activity; F:pyridoxal phosphate binding	1.9e-07	1.93	0	0.42
279	Cgl0840	-	putative secreted protein	2.34	0	2.54	0	0	0	7.3e-06	1.96	0	1
280	Cgl0846	-	ATP-dependent helicase	0	2.31	2.22	0	F:GO:0003676; F:GO:0004386; F:GO:0005524	F:nucleic acid binding; F:helicase activity; F:ATP binding	0.004	2.31	0	0.11
281	Cgl0966	-	bifunctional lysylphosphatidylglycerol flippase/synthetase MprF	0	2.32	2.33	0	C:GO:0005886; C:GO:0016021	C:plasma membrane; C:integral component of membrane	0.00066	2.32	0	0.0067
282	Cgl1013	-	hypothetical protein cgR_1101	2.77	0	2.07	0	0	0	5.2e-09	1.86	3.8e-14	0.15
283	Cgl1081	-	Adenylate kinase or related kinase	0	2.82	2.74	0	0	0	0.0031	2.82	0	0.26
284	Cgl1082	chaA	calcium:proton antiporter	2.18	2.03	2.45	0	P:GO:0055085; C:GO:0016021	P:transmembrane transport; C:integral component of membrane	6.1e-05	2.03	0	0.0043
285	Cgl1134	-	(2Fe-2S)-binding protein	0	2.23	2.28	0	F:GO:0051537	F:2 iron, 2 sulfur cluster binding	0.00072	2.23	0	0.12
286	Cgl1205	-	atpI [Brevibacterium flavum]	2.62	0	2.51	0	0	0	2.9e-11	2	0	0.061
287	Cgl1229	-	SAM-dependent methyltransferase	0	2.2	2.54	0	P:GO:0032259; F:GO:0008168	P:methylation; F:methyltransferase activity	0.0024	2.2	0	0.0088
288	Cgl1263	lysG	chromosome replication initiation inhibitor protein	0	2.58	2.72	0	P:GO:0006355; F:GO:0003677; F:GO:0003700	P:regulation of transcription, DNA-templated; F:DNA binding; F:DNA-binding transcription factor activity	0.011	2.58	0	0.13
289	Cgl1276	-	sugar ABC transporter ATP-binding protein	0	2.69	2.62	0	F:GO:0005524	F:ATP binding	0.067	2.69	0	0.55
290	Cgl1279	-	Acyl-CoA dehydrogenase family protein (C-terminal fragment)	0	2.66	2.74	0	0	0	0.11	2.66	0	0.29
291	Cgl1296	-	SRPBCC family protein	0	2.35	2.4	0	0	0	0.012	2.35	0	0.034
292	Cgl1300	-	hypothetical protein KbCgl_12610	2.65	0	2.12	0	0	0	7.7e-10	1.73	0	0.13
293	Cgl1306	-	Abi family protein	2.35	0	2.21	0	0	0	2.3e-05	1.48	3e-15	0.94
294	Cgl1309	-	MULTISPECIES: hypothetical protein	0	2.58	2.24	0	0	0	0.0003	2.58	0	0.16
295	Cgl1320	gpsA	glycerol-3-phosphate dehydrogenase	0	2.3	2.37	0	P:GO:0005975; P:GO:0006650; P:GO:0008654; P:GO:0046167; P:GO:0046168; F:GO:0004367; F:GO:0051287; C:GO:0009331	P:carbohydrate metabolic process; P:glycerophospholipid metabolic process; P:phospholipid biosynthetic process; P:glycerol-3-phosphate biosynthetic process; P:glycerol-3-phosphate catabolic process; F:glycerol-3-phosphate dehydrogenase [NAD+] activity; F:NAD binding; C:glycerol-3-phosphate dehydrogenase complex	0.1	2.3	0	0.17
296	Cgl1324	ung	uracil-DNA glycosylase	0	2.19	2.27	0	P:GO:0006284; F:GO:0004844; C:GO:0005737	P:base-excision repair; F:uracil DNA N-glycosylase activity; C:cytoplasm	0.098	2.19	0	0.083
297	Cgl1336	int1	site-specific integrase	3.41	0	2.56	0	P:GO:0006310; P:GO:0015074; F:GO:0003677	P:DNA recombination; P:DNA integration; F:DNA binding	6.1e-08	1.93	2e-12	0.43
298	Cgl1438	-	YchJ family protein	0	2.47	2.63	0	0	0	0.00043	2.47	0	0.011
299	Cgl1451	-	siderophore-interacting protein	0	2.27	2.41	0	F:GO:0016491	F:oxidoreductase activity	0.0041	2.27	0	0.49
300	Cgl1457	-	MurR/RpiR family transcriptional regulator	0	2.57	2.58	0	P:GO:0006355; P:GO:1901135; F:GO:0003700; F:GO:0097367	P:regulation of transcription, DNA-templated; P:carbohydrate derivative metabolic process; F:DNA-binding transcription factor activity; F:carbohydrate derivative binding	0.011	2.57	0	0.012
301	Cgl1566	-	alpha 1,6 mannopyranosyltransferase	0	2.28	2.2	0	F:GO:0016740; C:GO:0016021	F:transferase activity; C:integral component of membrane	0.013	2.28	0	0.13
302	Cgl1624	-	signal peptidase	2.81	2.09	2.44	0	P:GO:0006508; F:GO:0004190; C:GO:0016021	P:proteolysis; F:aspartic-type endopeptidase activity; C:integral component of membrane	1.6e-10	2.09	0	0.48
303	Cgl1895	-	hypothetical protein	2.3	0	2.5	0	0	0	0.00018	1.93	0	0.48
304	Cgl2041	thiG	thiazole synthase	0	2.68	2.58	0	P:GO:0009228; P:GO:0009229; F:GO:0016783; C:GO:0005737	P:thiamine biosynthetic process; P:thiamine diphosphate biosynthetic process; F:sulfurtransferase activity; C:cytoplasm	0.00055	2.68	0	0.0089
305	Cgl2201	cobS	adenosylcobinamide-GDP ribazoletransferase	0	2.48	2.38	0	P:GO:0009236; F:GO:0008818; F:GO:0051073; C:GO:0005886; C:GO:0016021	P:cobalamin biosynthetic process; F:cobalamin 5'-phosphate synthase activity; F:adenosylcobinamide-GDP ribazoletransferase activity; C:plasma membrane; C:integral component of membrane	0.00064	2.48	0	0.94
306	Cgl2339	dctX	C4-dicarboxylate ABC transporter permease	0	2.34	2.04	0	C:GO:0005886; C:GO:0016021	C:plasma membrane; C:integral component of membrane	0.0014	2.34	4.2e-18	0.77
307	Cgl2409	benK	MFS transporter	0	2.9	3.02	0	P:GO:0055085; F:GO:0022857; C:GO:0016021	P:transmembrane transport; F:transmembrane transporter activity; C:integral component of membrane	0.0032	2.9	0	0.0057
308	Cgl2410	benE	benzoate transporter	2.23	0	2.08	0	P:GO:0042919; F:GO:0042925; C:GO:0016021	P:benzoate transport; F:benzoate transmembrane transporter activity; C:integral component of membrane	9.4e-09	1.73	0	0.61
309	Cgl2416	-	serine hydrolase	2.37	0	2.11	0	F:GO:0016787	F:hydrolase activity	3.6e-06	1.75	2e-15	1
310	Cgl2434	-	MFS transporter	0	2.26	2.24	0	P:GO:0055085; F:GO:0022857; C:GO:0016021	P:transmembrane transport; F:transmembrane transporter activity; C:integral component of membrane	0.0041	2.26	0	0.78
311	Cgl2503	-	hypothetical protein	2.18	0	2.02	0	0	0	0.00011	1.45	2.2e-12	0.035
312	Cgl2615	-	23S rRNA methyltransferase	0	2.62	2.66	0	P:GO:0032259; F:GO:0008168; F:GO:0047571	P:methylation; F:methyltransferase activity; F:3-oxosteroid 1-dehydrogenase activity	0.00059	2.62	0	0.037
313	Cgl2646	nanA	dihydrodipicolinate synthase family protein	0	2.72	2.52	0	F:GO:0008747; F:GO:0008840	F:N-acetylneuraminate lyase activity; F:4-hydroxy-tetrahydrodipicolinate synthase activity	0.001	2.72	0	0.049
314	Cgl2649	-	hypothetical protein cgp_0392	2.87	0	2.43	0	0	0	3.1e-11	2	0	0.071
315	Cgl2663	cgtS5	HAMP domain-containing histidine kinase	0	2.46	2.27	0	P:GO:0000160; P:GO:0018106; F:GO:0000155; C:GO:0005886; C:GO:0016021	P:phosphorelay signal transduction system; P:peptidyl-histidine phosphorylation; F:phosphorelay sensor kinase activity; C:plasma membrane; C:integral component of membrane	0.00043	2.46	0	0.2
316	Cgl2758	-	MFS transporter	0	2.22	2.08	0	C:GO:0016021	C:integral component of membrane	0.00046	2.22	0	0.0063
317	Cgl2912	-	alpha/beta-hydrolase family protein	0	2.61	2.59	0	C:GO:0016021	C:integral component of membrane	0.0019	2.61	0	0.18
318	Cgl3000	mutM2	Fpg/Nei family DNA glycosylase	0	2.51	2.47	0	P:GO:0006284; P:GO:0006289; F:GO:0003684; F:GO:0008270; F:GO:0016799; F:GO:0140078	P:base-excision repair; P:nucleotide-excision repair; F:damaged DNA binding; F:zinc ion binding; F:hydrolase activity, hydrolyzing N-glycosyl compounds; F:class I DNA-(apurinic or apyrimidinic site) endonuclease activity	0.00036	2.51	0	0.16
319	Cgl3013	-	VWA domain-containing protein	2.19	0	2.24	0	C:GO:0016021	C:integral component of membrane	6.5e-05	1.96	8.3e-18	1
320	Cgl3045	-	NADH:flavin oxidoreductase/NADH oxidase	0	2.49	2.36	0	F:GO:0010181; F:GO:0016491	F:FMN binding; F:oxidoreductase activity	0.00069	2.49	0	0.0054
321	Cgl3056	catA3	hydroxyquinol 1,2-dioxygenase	0	2.62	2.62	0	P:GO:0009712; P:GO:0019439; F:GO:0008199; F:GO:0018576	P:catechol-containing compound metabolic process; P:aromatic compound catabolic process; F:ferric iron binding; F:catechol 1,2-dioxygenase activity	0.0038	2.62	0	0.16
322	Cgl3060	-	dehydrogenase	0	2.18	2.3	0	F:GO:0016491	F:oxidoreductase activity	0.021	2.18	0	0.63
323	Cgl3061	-	sugar phosphate isomerase/epimerase	0	3.2	2.86	0	F:GO:0016853	F:isomerase activity	0.0057	3.2	0	0.67
324	Cgl1604	dfp	phosphopantothenoylcysteine decarboxylase	0	0	0	7.15	P:GO:0015937; P:GO:0015941; F:GO:0004632; F:GO:0004633; F:GO:0010181; F:GO:0046872	P:coenzyme A biosynthetic process; P:pantothenate catabolic process; F:phosphopantothenate--cysteine ligase activity; F:phosphopantothenoylcysteine decarboxylase activity; F:FMN binding; F:metal ion binding	0.057	1.16	0	0
325	Cgl3081	-	copper chaperone	0	0	0	6.12	P:GO:0006825; P:GO:0030001; F:GO:0005507	P:copper ion transport; P:metal ion transport; F:copper ion binding	0.011	1.86	4.2e-10	0
326	Cgl1114	-	MULTISPECIES: DUF3117 domain-containing protein	0	0	0	6.05	0	0	0.82	0.52	0.00051	0
327	Cgl2282	-	VIT1/CCC1 transporter family protein	0	0	0	5.92	P:GO:0030026; P:GO:0071421; F:GO:0005384; C:GO:0016021	P:cellular manganese ion homeostasis; P:manganese ion transmembrane transport; F:manganese ion transmembrane transporter activity; C:integral component of membrane	0.13	0.99	1.6e-06	0
328	Cgl2342	-	type II toxin-antitoxin system PemK/MazF family toxin	0	0	0	5.74	F:GO:0003677; F:GO:0003963	F:DNA binding; F:RNA-3'-phosphate cyclase activity	0.031	1.47	0	0
329	Cgl2774	-	hypothetical protein	0	0	0	5.29	0	0	0.0038	1.62	4.8e-16	0
330	Cgl2702	speE	spermidine synthase	0	0	0	5.16	P:GO:0008295; F:GO:0004766; C:GO:0005886; C:GO:0016021	P:spermidine biosynthetic process; F:spermidine synthase activity; C:plasma membrane; C:integral component of membrane	0.13	1.41	8.2e-14	0
331	Cgl1191	mog	molybdenum cofactor biosynthesis protein	0	0	0	4.94	0	0	0.047	1.86	1.2e-15	1.8e-32
332	Cgl1115	rrmA	SAM-dependent methyltransferase	0	0	0	4.83	P:GO:0032259; F:GO:0008168; F:GO:0046872	P:methylation; F:methyltransferase activity; F:metal ion binding	0.25	0.26	4.2e-07	0
333	Cgl1493	-	YafY family transcriptional regulator	0	0	0	4.37	0	0	1	0.82	0	0
334	Cgl0278	ponA	penicillin-binding protein	0	0	0	4.33	P:GO:0006508; F:GO:0004180; F:GO:0008658; F:GO:0008955	P:proteolysis; F:carboxypeptidase activity; F:penicillin binding; F:peptidoglycan glycosyltransferase activity	0.2	-0.16	0.0008	0
335	Cgl2283	uppS2	undecaprenyl pyrophosphate synthase	0	0	0	4.33	F:GO:0000287; F:GO:0004659	F:magnesium ion binding; F:prenyltransferase activity	0.13	0.1	0.007	0
336	Cgl0929	prfC	peptide chain release factor 3	0	0	0	4.3	P:GO:0006449; F:GO:0003924; F:GO:0005525; F:GO:0016149; C:GO:0005737	P:regulation of translational termination; F:GTPase activity; F:GTP binding; F:translation release factor activity, codon specific; C:cytoplasm	0.22	-0.19	0.52	0
337	Cgl2168	-	membrane protein	0	0	0	4.29	C:GO:0016021	C:integral component of membrane	0.0021	0.53	0.12	0
338	Cgl1143	-	patatin-like phospholipase family protein	0	0	0	4.27	P:GO:0016042; F:GO:0016787	P:lipid catabolic process; F:hydrolase activity	0.0043	1.72	0	1.6e-22
339	Cgl2209	lipA	lipoyl synthase	0	0	0	4.26	P:GO:0009107; P:GO:0009249; F:GO:0016992; F:GO:0046872; F:GO:0051539; F:GO:0102552; F:GO:0102553; C:GO:0005737	P:lipoate biosynthetic process; P:protein lipoylation; F:lipoate synthase activity; F:metal ion binding; F:4 iron, 4 sulfur cluster binding; F:lipoyl synthase activity (acting on glycine-cleavage complex H protein; F:lipoyl synthase activity (acting on pyruvate dehydrogenase E2 protein); C:cytoplasm	0.27	-0.71	0.41	0
340	Cgl1601	def2	peptide deformylase	0	0	0	4.05	P:GO:0006412; F:GO:0042586; F:GO:0046872	P:translation; F:peptide deformylase activity; F:metal ion binding	1	0.9	0.00039	1.6e-40
341	Cgl1501	-	HigA family addiction module antidote protein	0	0	0	4.04	F:GO:0003677	F:DNA binding	0.56	1.11	1.3e-06	1.1e-36
342	Cgl2999	dps	DNA starvation/stationary phase protection protein Dps	0	0	0	4.04	F:GO:0003677; F:GO:0004322; F:GO:0008199	F:DNA binding; F:ferroxidase activity; F:ferric iron binding	0.42	1.91	0	0
343	Cgl2923	-	LURP-one-related family protein	0	0	0	3.98	P:GO:0017121; F:GO:0017128	P:plasma membrane phospholipid scrambling; F:phospholipid scramblase activity	0.0031	0.97	1.5e-12	2.6e-32
344	Cgl1603	metK	S-adenosylmethionine synthetase	0	-2.46	0	3.84	P:GO:0006556; P:GO:0006730; F:GO:0000287; F:GO:0004478; F:GO:0005524; C:GO:0005737	P:S-adenosylmethionine biosynthetic process; P:one-carbon metabolic process; F:magnesium ion binding; F:methionine adenosyltransferase activity; F:ATP binding; C:cytoplasm	0	-2.46	0.053	0
345	Cgl2003	gor	mycothione reductase	0	0	0	3.61	P:GO:0045454; P:GO:0098869; F:GO:0004362; F:GO:0050627; F:GO:0050660	P:cell redox homeostasis; P:cellular oxidant detoxification; F:glutathione-disulfide reductase activity; F:mycothione reductase activity; F:flavin adenine dinucleotide binding	0.91	1.28	1.3e-09	2.5e-30
346	Cgl2658	-	putative membrane protein	0	0	0	3.61	C:GO:0016021	C:integral component of membrane	2.2e-05	1.95	2.1e-18	6.1e-11
347	Cgl1532	-	DNA-binding protein	0	0	0	3.56	F:GO:0003677	F:DNA binding	0.25	0.16	0.0031	2.5e-57
348	Cgl1281	-	cobalt-zinc-cadmium resistance protein	0	0	0	3.54	P:GO:0098655; F:GO:0008324; C:GO:0016021	P:cation transmembrane transport; F:cation transmembrane transporter activity; C:integral component of membrane	0.082	-0.02	0.024	2e-38
349	Cgl1600	fmt	methionyl-tRNA formyltransferase	0	0	0	3.54	P:GO:0006413; P:GO:0071951; F:GO:0004479	P:translational initiation; P:conversion of methionyl-tRNA to N-formyl-methionyl-tRNA; F:methionyl-tRNA formyltransferase activity	0.44	0.5	0.0003	8.8e-30
350	Cgl2840	-	NADPH-dependent F420 reductase	0	0	0	3.54	P:GO:0000271; P:GO:0055114; F:GO:0016491; F:GO:0016616; F:GO:0016628; F:GO:0051287	P:polysaccharide biosynthetic process; P:obsolete oxidation-reduction process; F:oxidoreductase activity; F:oxidoreductase activity, acting on the CH-OH group of donors, NAD or NADP as acceptor; F:oxidoreductase activity, acting on the CH-CH group of donors, NAD or NADP as acceptor; F:NAD binding	0.1	0.04	0.56	3.4e-44
351	Cgl1148	cydD	ABC transporter ATP-binding protein/permease	0	0	0	3.53	P:GO:0055085; F:GO:0005524; F:GO:0042626; C:GO:0016021	P:transmembrane transport; F:ATP binding; F:ATPase-coupled transmembrane transporter activity; C:integral component of membrane	0.00088	1.37	1.2e-10	4.8e-22
352	Cgl2965	cgtR9	PhoR family transcriptional regulator	0	0	0	3.52	P:GO:0000160; P:GO:0006355; F:GO:0003677	P:phosphorelay signal transduction system; P:regulation of transcription, DNA-templated; F:DNA binding	0.00082	1.15	1.1e-06	8e-10
353	Cgl0796	-	putative secreted protein	0	0	0	3.49	0	0	0.55	-0.39	0.26	1.1e-21
354	Cgl2497	-	peptidase M23	0	0	0	3.47	0	0	0.0044	1.56	1.6e-18	1.2e-12
355	Cgl0616	-	Hypothetical protein	0	0	0	3.45	0	0	4.5e-06	1.78	1.8e-18	4.2e-11
356	Cgl1494	-	Pup--protein ligase	0	0	0	3.44	P:GO:0010498; P:GO:0019941; P:GO:0070490; F:GO:0000287; F:GO:0005524; F:GO:0016879; F:GO:0019787; C:GO:0000502	P:proteasomal protein catabolic process; P:modification-dependent protein catabolic process; P:protein pupylation; F:magnesium ion binding; F:ATP binding; F:ligase activity, forming carbon-nitrogen bonds; F:ubiquitin-like protein transferase activity; C:proteasome complex	0.0028	0.66	1	0
357	Cgl2978	-	MFS transporter	0	0	0	3.43	P:GO:0055085; F:GO:0022857; C:GO:0016021	P:transmembrane transport; F:transmembrane transporter activity; C:integral component of membrane	0.34	0.23	9.6e-05	1.5e-41
358	Cgl0907	-	cadmium transporter	0	0	0	3.42	C:GO:0016021	C:integral component of membrane	3.1e-05	1.83	0	1.4e-11
359	Cgl2838	hmp	hemin transporter	0	0	0	3.39	P:GO:0015671; P:GO:0051409; F:GO:0005344; F:GO:0008941; F:GO:0019825; F:GO:0020037; F:GO:0071949	P:oxygen transport; P:response to nitrosative stress; F:oxygen carrier activity; F:nitric oxide dioxygenase activity; F:oxygen binding; F:heme binding; F:FAD binding	0.004	1.33	2.6e-13	3e-15
360	Cgl1128	-	CueP family metal-binding protein	0	0	0	3.37	0	0	0.0026	0.56	3.7e-05	4.6e-14
361	Cgl2926	msrA	methionine sulfoxide reductase A	0	0	0	3.35	P:GO:0006464; F:GO:0008113	P:cellular protein modification process; F:peptide-methionine (S)-S-oxide reductase activity	0.00076	0.38	0.28	0
362	Cgl2772	-	RNA methyltransferase	0	0	0	3.34	P:GO:0001510; P:GO:0006396; F:GO:0003723; F:GO:0008173	P:RNA methylation; P:RNA processing; F:RNA binding; F:RNA methyltransferase activity	0.87	0.26	0.0042	9e-35
363	Cgl1373	-	helicase	0	0	0	3.31	P:GO:0032508; F:GO:0003677; F:GO:0003678; F:GO:0005524	P:DNA duplex unwinding; F:DNA binding; F:DNA helicase activity; F:ATP binding	0.95	0.61	4.7e-10	1.1e-20
364	Cgl2859	-	putative membrane protein	0	2.02	0	3.3	C:GO:0016021	C:integral component of membrane	0.00087	2.02	0	8.6e-09
365	Cgl0471	ubiE	demethylmenaquinone methyltransferase	0	0	0	3.29	P:GO:0009234; P:GO:0032259; F:GO:0043770; F:GO:0102027; F:GO:0102094; F:GO:0102955	P:menaquinone biosynthetic process; P:methylation; F:demethylmenaquinone methyltransferase activity; F:S-adenosylmethionine:2-demethylquinol-8 methyltransferase activity; F:S-adenosylmethionine:2-demethylmenaquinol methyltransferase activity; F:S-adenosylmethionine:2-demethylmenaquinol-7 methyltransferase activity	0.98	0.73	0.00056	8.4e-21
366	Cgl2998	-	DUF1846 domain-containing protein	0	0	0	3.29	0	0	0.11	0.79	1.3e-08	4.4e-19
367	Cgl1147	cydC	thiol reductant ABC exporter subunit CydC	0	0	0	3.23	P:GO:0034775; P:GO:0045454; F:GO:0005524; F:GO:0042626; C:GO:0016021	P:glutathione transmembrane transport; P:cell redox homeostasis; F:ATP binding; F:ATPase-coupled transmembrane transporter activity; C:integral component of membrane	0.004	1.5	0	1.2e-12
368	Cgl1668	-	phosphatidylinositol mannoside acyltransferase	0	0	0	3.22	F:GO:0016746; C:GO:0005886; C:GO:0016021	F:transferase activity, transferring acyl groups; C:plasma membrane; C:integral component of membrane	0.62	1.71	1.4e-13	2.4e-09
369	Cgl2216	-	cupin domain-containing protein	0	0	0	3.22	F:GO:0016829; F:GO:0047575	F:lyase activity; F:4-carboxymuconolactone decarboxylase activity	0.087	1.15	0.0009	2.7e-17
370	Cgl2333	-	phosphoprotein phosphatase	0	0	0	3.21	F:GO:0016787	F:hydrolase activity	0.004	1.29	4.3e-14	8.9e-13
371	Cgl0317	bglS'	beta-glucosidase	0	0	0	3.19	P:GO:0005975; F:GO:0004553	P:carbohydrate metabolic process; F:hydrolase activity, hydrolyzing O-glycosyl compounds	0.24	1.38	3.3e-14	9.6e-14
372	Cgl0470	-	D-serine/D-alanine/glycine transporter	0	0	0	3.19	P:GO:0055085; C:GO:0016021	P:transmembrane transport; C:integral component of membrane	0.06	0.97	6.4e-09	6.8e-17
373	Cgl0795	-	MULTISPECIES: hypothetical protein	0	0	0	3.19	0	0	2e-05	0.66	6.1e-05	8.6e-15
374	Cgl1536	-	MULTISPECIES: hypothetical protein	0	0	0	3.17	0	0	0.29	0.17	0.063	6e-21
375	Cgl2379	-	TIGR00730 family Rossman fold protein	0	0	0	3.17	P:GO:0009691; F:GO:0003677; F:GO:0016787	P:cytokinin biosynthetic process; F:DNA binding; F:hydrolase activity	0.066	0.24	0.44	7.4e-54
376	Cgl2380	mdh	malate dehydrogenase	0	0	0	3.14	P:GO:0005975; P:GO:0006099; P:GO:0006108; F:GO:0030060	P:carbohydrate metabolic process; P:tricarboxylic acid cycle; P:malate metabolic process; F:L-malate dehydrogenase activity	0.00021	1.19	0.14	5.5e-64
377	Cgl2779	-	DUF4265 domain-containing protein	0	0	0	3.11	0	0	0	-0.62	0	0
378	Cgl2780	clpB	NDP-hexose 4-ketoreductase	0	0	0	3.09	P:GO:0006508; P:GO:0009408; P:GO:0042026; F:GO:0005524; F:GO:0008233; F:GO:0016887; C:GO:0005737	P:proteolysis; P:response to heat; P:protein refolding; F:ATP binding; F:peptidase activity; F:ATPase activity; C:cytoplasm	2.2e-11	0.36	0	0
379	Cgl1660	ruvB	Holliday junction DNA helicase RuvB	0	0	0	3.08	P:GO:0006281; P:GO:0006310; P:GO:0009432; P:GO:0032508; F:GO:0003677; F:GO:0005524; F:GO:0009378	P:DNA repair; P:DNA recombination; P:SOS response; P:DNA duplex unwinding; F:DNA binding; F:ATP binding; F:four-way junction helicase activity	0.049	1.43	1.3e-11	4.1e-11
380	Cgl0955	-	MULTISPECIES: hypothetical protein	-2.63	0	0	3.07	0	0	0	0.07	0.001	0
381	Cgl1062	-	osmotically inducible protein C	0	0	0	3.07	0	0	0.032	1.89	6.1e-16	1.1e-07
382	Cgl1508	-	MULTISPECIES: hypothetical protein	0	0	0	3.07	0	0	0.26	0.7	4.5e-05	1.4e-15
383	Cgl0064	-	nicotinamide riboside transporter PnuC	0	0	0	3.04	P:GO:0034258; F:GO:0034257; C:GO:0016021	P:nicotinamide riboside transport; F:nicotinamide riboside transmembrane transporter activity; C:integral component of membrane	0.00061	1.67	1.2e-15	6.5e-11
384	Cgl2979	-	PadR family transcriptional regulator	0	0	0	3.03	0	0	1.1e-09	1.03	5.1e-06	2e-35
385	Cgl0483	-	FAD-dependent oxidoreductase	0	0	0	3.01	P:GO:0055114; F:GO:0016491	P:obsolete oxidation-reduction process; F:oxidoreductase activity	0.001	1.5	2e-12	1.7e-09
386	Cgl0935	pth2	peptidyl-tRNA hydrolase	0	0	0	3.01	P:GO:0006412; F:GO:0004045; C:GO:0005737	P:translation; F:aminoacyl-tRNA hydrolase activity; C:cytoplasm	0.076	1.58	6.6e-10	4.2e-10
387	Cgl1923	-	proteasome protein	0	0	0	2.98	C:GO:0000502	C:proteasome complex	0.03	0.41	0.88	2.6e-55
388	Cgl2505	-	DUF2254 domain-containing protein	0	0	0	2.97	C:GO:0016021	C:integral component of membrane	0.00059	1.54	5.4e-10	5e-09
389	Cgl3001	-	RtcB family protein	0	0	0	2.97	P:GO:0008033; F:GO:0005525; F:GO:0008452; F:GO:0016740; F:GO:0046872	P:tRNA processing; F:GTP binding; F:RNA ligase activity; F:transferase activity; F:metal ion binding	0.003	1.05	2.7e-08	1.5e-14
390	Cgl2980	dnaB	replicative DNA helicase	0	0	0	2.95	P:GO:0006269; P:GO:0032508; F:GO:0003677; F:GO:0003678; F:GO:0005524; C:GO:1990077	P:DNA replication, synthesis of RNA primer; P:DNA duplex unwinding; F:DNA binding; F:DNA helicase activity; F:ATP binding; C:primosome complex	0.015	0.65	0.026	1.6e-28
391	Cgl1144	-	alpha/beta hydrolase	0	0	0	2.93	F:GO:0047570	F:3-oxoadipate enol-lactonase activity	4.9e-07	1.4	0	1.7e-08
392	Cgl1138	-	DHA2 family efflux MFS transporter permease subunit	0	0	0	2.91	P:GO:0055085; F:GO:0022857; C:GO:0005886; C:GO:0016021	P:transmembrane transport; F:transmembrane transporter activity; C:plasma membrane; C:integral component of membrane	1	0.29	0.0011	1.8e-16
393	Cgl2797	hspR	MerR family transcriptional regulator	0	0	0	2.91	P:GO:0006355; F:GO:0003677	P:regulation of transcription, DNA-templated; F:DNA binding	0	-0.32	1.3e-09	0
394	Cgl2563	cysE	serine acetyltransferase	0	0	0	2.88	P:GO:0006535; F:GO:0009001; C:GO:0005737	P:cysteine biosynthetic process from serine; F:serine O-acetyltransferase activity; C:cytoplasm	0.12	0.8	2.7e-16	2.3e-18
395	Cgl1354	-	MFS transporter	0	0	0	2.86	P:GO:0055085; F:GO:0022857; C:GO:0016021	P:transmembrane transport; F:transmembrane transporter activity; C:integral component of membrane	0.037	1.43	7.4e-11	3.9e-09
396	Cgl0147	-	RNA-binding S4 domain-containing protein	0	0	0	2.85	F:GO:0003723	F:RNA binding	1.3e-14	1.19	0.59	8.1e-47
397	Cgl2286	-	HlyC/CorC family transporter	0	0	0	2.84	F:GO:0050660; C:GO:0016021	F:flavin adenine dinucleotide binding; C:integral component of membrane	0.42	0.43	0.0022	3.5e-18
398	Cgl0920	-	putative membrane protein	0	0	0	2.82	C:GO:0016021	C:integral component of membrane	1	0.43	0.0088	8.5e-16
399	Cgl1012	-	MULTISPECIES: hypothetical protein	0	0	0	2.8	0	0	0.00071	0.86	5.1e-07	6.9e-05
400	Cgl2258	-	Hypothetical protein	0	0	0	2.78	0	0	0.092	-1.12	0	0
401	Cgl0448	menA	1,4-dihydroxy-2-naphthoate polyprenyltransferase	0	0	0	2.75	P:GO:0009234; F:GO:0046428; C:GO:0005887	P:menaquinone biosynthetic process; F:1,4-dihydroxy-2-naphthoate octaprenyltransferase activity; C:integral component of plasma membrane	1.4e-05	1.74	1.6e-18	4.1e-08
402	Cgl2654	-	ABC transporter ATP-binding protein	0	0	0	2.74	P:GO:0015833; P:GO:0055085; F:GO:0005524; F:GO:0016887; C:GO:0005886; C:GO:0016021	P:peptide transport; P:transmembrane transport; F:ATP binding; F:ATPase activity; C:plasma membrane; C:integral component of membrane	0.043	1.68	1.7e-14	2.7e-07
403	Cgl2661	-	CarD-like transcriptional regulator	0	0	0	2.73	0	0	0.021	0.33	0.41	5.7e-29
404	Cgl0941	-	DNA alkylation repair protein	0	0	0	2.71	0	0	1	0.38	0.55	5.4e-17
405	Cgl1024	xseB	exodeoxyribonuclease VII small subunit	0	0	0	2.71	P:GO:0006308; P:GO:0090305; F:GO:0008855; C:GO:0005737; C:GO:0009318	P:DNA catabolic process; P:nucleic acid phosphodiester bond hydrolysis; F:exodeoxyribonuclease VII activity; C:cytoplasm; C:exodeoxyribonuclease VII complex	0.9	1.52	7.5e-10	1.4e-11
406	Cgl0995	coaA	pantothenate kinase	0	0	0	2.7	P:GO:0015937; P:GO:0016310; F:GO:0004594; F:GO:0005524; C:GO:0005737	P:coenzyme A biosynthetic process; P:phosphorylation; F:pantothenate kinase activity; F:ATP binding; C:cytoplasm	0.18	1.06	4.1e-07	3.5e-10
407	Cgl3094	parB	cell division protein	0	0	0	2.69	P:GO:0051301; F:GO:0003677	P:cell division; F:DNA binding	0.35	0.62	0.023	7.8e-15
408	Cgl1661	ruvA	Holliday junction DNA helicase RuvA	0	0	0	2.68	P:GO:0006281; P:GO:0006310; P:GO:0009432; P:GO:0032508; F:GO:0003677; F:GO:0005524; F:GO:0009378; C:GO:0009379	P:DNA repair; P:DNA recombination; P:SOS response; P:DNA duplex unwinding; F:DNA binding; F:ATP binding; F:four-way junction helicase activity; C:Holliday junction helicase complex	0.01	1.43	7.4e-12	5.8e-08
409	Cgl2925	-	amidohydrolase	0	0	0	2.67	F:GO:0050118	F:N-acetyldiaminopimelate deacetylase activity	0.038	0.33	0.069	2.6e-74
410	Cgl0992	-	undecaprenyl pyrophosphate synthase	0	0	0	2.65	F:GO:0000287; F:GO:0004659	F:magnesium ion binding; F:prenyltransferase activity	0.0071	1.66	3e-12	1.4e-06
411	Cgl0913	pdxK	pyridoxal kinase	0	0	0	2.63	P:GO:0009443; P:GO:0016310; F:GO:0008478	P:pyridoxal 5'-phosphate salvage; P:phosphorylation; F:pyridoxal kinase activity	0.73	0.65	0.022	1.5e-12
412	Cgl0938	pth1	peptidyl-tRNA hydrolase	0	0	0	2.63	P:GO:0006412; F:GO:0004045; C:GO:0005737	P:translation; F:aminoacyl-tRNA hydrolase activity; C:cytoplasm	0.8	-0.29	1.2e-06	6.8e-27
413	Cgl2055	-	ankyrin repeat-containing protein	0	0	0	2.63	0	0	0.0002	1.47	1.3e-13	2.1e-06
414	Cgl2659	ispF	2-C-methyl-D-erythritol 2,4-cyclodiphosphate synthase	0	0	0	2.63	P:GO:0016114; P:GO:0019288; F:GO:0008685; F:GO:0046872	P:terpenoid biosynthetic process; P:isopentenyl diphosphate biosynthetic process, methylerythritol 4-phosphate pathway; F:2-C-methyl-D-erythritol 2,4-cyclodiphosphate synthase activity; F:metal ion binding	0.31	0.36	0.0078	9.7e-16
415	Cgl2211	-	transporter	0	0	0	2.59	P:GO:0006813; P:GO:0098655; F:GO:0008324; C:GO:0005886; C:GO:0016021	P:potassium ion transport; P:cation transmembrane transport; F:cation transmembrane transporter activity; C:plasma membrane; C:integral component of membrane	0.0059	0.93	7.1e-06	1e-13
416	Cgl0417	hemA	glutamyl-tRNA reductase	0	0	0	2.57	P:GO:0006782; F:GO:0008883; F:GO:0050661	P:protoporphyrinogen IX biosynthetic process; F:glutamyl-tRNA reductase activity; F:NADP binding	0.2	0.46	0.029	1.8e-13
417	Cgl2279	-	ArsR family transcriptional regulator	0	0	0	2.57	P:GO:0006355; F:GO:0003700	P:regulation of transcription, DNA-templated; F:DNA-binding transcription factor activity	0.0014	1.92	5.5e-06	6.9e-10
418	Cgl0617	-	DNA polymerase	0	0	0	2.55	P:GO:0006281	P:DNA repair	0.019	1.63	5.3e-09	1.1e-05
419	Cgl0526	-	hypothetical protein	0	0	0	2.54	0	0	0.0026	1.31	5.3e-15	2.4e-05
420	Cgl0960	-	MULTISPECIES: hypothetical protein	0	0	0	2.54	0	0	0.81	-0.23	0.026	2.5e-19
421	Cgl1492	-	transcriptional regulator	0	0	0	2.52	F:GO:0003677	F:DNA binding	0.73	-0.31	0.12	8e-15
422	Cgl2798	dnaJ	molecular chaperone DnaJ	0	0	0	2.51	P:GO:0006260; P:GO:0006457; P:GO:0009408; F:GO:0005524; F:GO:0008270; F:GO:0031072; F:GO:0051082; C:GO:0005737	P:DNA replication; P:protein folding; P:response to heat; F:ATP binding; F:zinc ion binding; F:heat shock protein binding; F:unfolded protein binding; C:cytoplasm	9.3e-08	-0.45	1.1e-09	4.1e-78
423	Cgl1130	-	ABC transporter ATP-binding protein	0	0	0	2.49	P:GO:0055085; F:GO:0005524; F:GO:0042626; C:GO:0016021	P:transmembrane transport; F:ATP binding; F:ATPase-coupled transmembrane transporter activity; C:integral component of membrane	0.0044	2	7.7e-17	0.00011
424	Cgl1366	rbsK1	ribokinase	0	0	0	2.48	P:GO:0019303; P:GO:0046835; F:GO:0004747; F:GO:0005524; F:GO:0046872; C:GO:0005737	P:D-ribose catabolic process; P:carbohydrate phosphorylation; F:ribokinase activity; F:ATP binding; F:metal ion binding; C:cytoplasm	2.7e-09	1.73	1.2e-08	2e-08
425	Cgl2577	-	DUF2993 domain-containing protein	0	0	0	2.48	0	0	0.00013	1.66	0	3.2e-06
426	Cgl0797	-	Hypothetical protein	0	0	0	2.47	0	0	0.51	-1.91	0.0019	6.6e-18
427	Cgl0921	-	hypothetical protein A583_04970	0	0	0	2.47	0	0	0.6	0.58	1.7e-06	1.1e-09
428	Cgl0063	-	chloride channel protein	0	0	0	2.45	P:GO:1902476; F:GO:0005247; C:GO:0016021	P:chloride transmembrane transport; F:voltage-gated chloride channel activity; C:integral component of membrane	0.0073	1.78	8.7e-16	1.7e-05
429	Cgl2208	lipB	lipoate-protein ligase B	0	0	0	2.45	P:GO:0009249; F:GO:0016874; F:GO:0033819; F:GO:0102555; C:GO:0005737	P:protein lipoylation; F:ligase activity; F:lipoyl(octanoyl) transferase activity; F:octanoyl transferase activity (acting on glycine-cleavage complex H protein); C:cytoplasm	0.13	1.1	5e-06	5.4e-07
430	Cgl2608	-	MerR family transcriptional regulator	0	0	0	2.45	P:GO:0006355; F:GO:0003677	P:regulation of transcription, DNA-templated; F:DNA binding	0.031	1.22	9.9e-12	5.7e-07
431	Cgl1196	moeA3	molybdopterin biosynthesis protein	0	2.09	0	2.44	P:GO:0006777; P:GO:0032324; F:GO:0046872; F:GO:0061599	P:Mo-molybdopterin cofactor biosynthetic process; P:molybdopterin cofactor biosynthetic process; F:metal ion binding; F:molybdopterin molybdotransferase activity	0.0044	2.09	1.6e-15	0.00054
432	Cgl2499	-	MULTISPECIES: DUF3817 domain-containing protein	0	0	0	2.44	C:GO:0005886; C:GO:0016021	C:plasma membrane; C:integral component of membrane	0.017	0.72	0.002	2.7e-17
433	Cgl2665	radA	DNA repair protein RadA	0	0	0	2.43	P:GO:0000725; F:GO:0003684; F:GO:0005524; F:GO:0008094; F:GO:0046872	P:recombinational repair; F:damaged DNA binding; F:ATP binding; F:DNA-dependent ATPase activity; F:metal ion binding	0.0016	1.7	1.2e-13	1.1e-05
434	Cgl0951	-	YihY/virulence factor BrkB family protein	0	0	0	2.41	F:GO:0016787; C:GO:0016021	F:hydrolase activity; C:integral component of membrane	0.48	0.69	0.00038	1.9e-09
435	Cgl0390	-	ABC transporter permease	0	0	0	2.4	P:GO:0055085; F:GO:0022857; C:GO:0005886; C:GO:0016021	P:transmembrane transport; F:transmembrane transporter activity; C:plasma membrane; C:integral component of membrane	0.00012	1.54	1e-09	6.7e-06
436	Cgl1896	ribD	pyrimidine reductase family protein	0	0	0	2.4	P:GO:0009231; F:GO:0008703	P:riboflavin biosynthetic process; F:5-amino-6-(5-phosphoribosylamino)uracil reductase activity	0.00033	1.53	0	2.6e-05
437	Cgl1142	-	putative secreted protein	0	0	0	2.39	F:GO:0047134; C:GO:0016021	F:protein-disulfide reductase activity; C:integral component of membrane	1e-05	-0.72	0.78	3.7e-26
438	Cgl2323	-	ABC transporter ATP-binding protein	0	0	0	2.39	P:GO:0015833; F:GO:0005524; F:GO:0016887	P:peptide transport; F:ATP binding; F:ATPase activity	0.13	1.7	4.4e-13	2.5e-05
439	Cgl0447	-	Hypothetical membrane protein	0	0	0	2.38	C:GO:0016021	C:integral component of membrane	0.2	0.85	0.0081	2.4e-13
440	Cgl0149	-	cysteine methyltransferase	0	0	0	2.37	P:GO:0006281; P:GO:0032259; F:GO:0008168	P:DNA repair; P:methylation; F:methyltransferase activity	0.025	1.23	2.6e-07	2.7e-07
441	Cgl1500	recB	RecB family exonuclease	0	0	0	2.37	P:GO:0090305; F:GO:0004519; F:GO:0004527	P:nucleic acid phosphodiester bond hydrolysis; F:endonuclease activity; F:exonuclease activity	0.011	-0.56	0.59	1.3e-18
442	Cgl0389	-	ABC transporter substrate-binding protein	0	2.03	0	2.36	F:GO:0046872	F:metal ion binding	0.018	2.03	0	0.00011
443	Cgl2294	-	hypothetical protein	0	0	0	2.36	0	0	0.43	0.05	0.88	1.5e-17
444	Cgl2773	pyrE	orotate phosphoribosyltransferase	0	0	0	2.36	P:GO:0009116; P:GO:0044205; F:GO:0000287; F:GO:0004588	P:nucleoside metabolic process; P:'de novo' UMP biosynthetic process; F:magnesium ion binding; F:orotate phosphoribosyltransferase activity	0.041	-1.4	0.0019	6e-32
445	Cgl2894	-	GntR family transcriptional regulator	0	0	0	2.36	P:GO:0006355; F:GO:0003677; F:GO:0003700	P:regulation of transcription, DNA-templated; F:DNA binding; F:DNA-binding transcription factor activity	0.0016	1.73	2.2e-13	3.7e-06
446	Cgl0168	-	prevent-host-death protein	0	0	0	2.35	0	0	0.15	0.83	0.00021	1.3e-09
447	Cgl2053	-	MULTISPECIES: cupin domain-containing protein	0	2.12	0	2.35	0	0	0.00028	2.12	6.8e-18	0.00066
448	Cgl2285	bex	GTPase Era	0	0	0	2.35	P:GO:0042274; F:GO:0003924; F:GO:0005525; F:GO:0070181; C:GO:0005737; C:GO:0005886	P:ribosomal small subunit biogenesis; F:GTPase activity; F:GTP binding; F:small ribosomal subunit rRNA binding; C:cytoplasm; C:plasma membrane	0.51	-1.25	3.1e-07	5.6e-42
449	Cgl1662	ruvC	crossover junction endodeoxyribonuclease RuvC	0	0	0	2.34	P:GO:0006281; P:GO:0006310; P:GO:0090305; F:GO:0000287; F:GO:0003676; F:GO:0008821	P:DNA repair; P:DNA recombination; P:nucleic acid phosphodiester bond hydrolysis; F:magnesium ion binding; F:nucleic acid binding; F:crossover junction endodeoxyribonuclease activity	0.13	1.11	7.5e-05	4.9e-08
450	Cgl1982	dinF	MATE family efflux transporter	0	0	0	2.34	P:GO:0042908; P:GO:0055085; F:GO:0015297; F:GO:0042910; C:GO:0016021	P:xenobiotic transport; P:transmembrane transport; F:antiporter activity; F:xenobiotic transmembrane transporter activity; C:integral component of membrane	0.0015	1.79	9.4e-18	0.00014
451	Cgl2647	-	ROK family transcriptional regulator	0	0	0	2.32	P:GO:0046835; F:GO:0009384	P:carbohydrate phosphorylation; F:N-acylmannosamine kinase activity	7.5e-07	1.85	7.6e-13	8.1e-06
452	Cgl1351	-	putative KAP-like P-loop ATPase	0	0	0	2.31	C:GO:0016020; C:GO:0016021	C:membrane; C:integral component of membrane	0.25	-0.46	0.075	4.1e-08
453	Cgl1414	recN	DNA repair protein RECN	0	0	0	2.31	P:GO:0006281; P:GO:0006310; F:GO:0005524	P:DNA repair; P:DNA recombination; F:ATP binding	0.22	1.57	6.1e-10	0.00013
454	Cgl1537	hemH	ferrochelatase	0	0	0	2.3	P:GO:0006783; F:GO:0004325; F:GO:0046872; C:GO:0005737	P:heme biosynthetic process; F:ferrochelatase activity; F:metal ion binding; C:cytoplasm	0.82	-0.32	0.076	4.7e-20
455	Cgl2324	-	2'-5' RNA ligase	0	0	0	2.3	F:GO:0004113; F:GO:0008664	F:2',3'-cyclic-nucleotide 3'-phosphodiesterase activity; F:2'-5'-RNA ligase activity	0.2	0.93	5.7e-08	2.7e-07
456	Cgl1101	-	membrane protein	0	0	0	2.29	F:GO:0047134; C:GO:0016021	F:protein-disulfide reductase activity; C:integral component of membrane	0.012	1.15	6.5e-12	0.00076
457	Cgl0608	-	MULTISPECIES: hypothetical protein	0	0	0	2.27	0	0	0.0055	0.62	0.025	4.1e-09
458	Cgl1495	-	prokaryotic ubiquitin-like protein Pup	0	0	0	2.27	P:GO:0010498; P:GO:0019941; P:GO:0070490; F:GO:0031386; F:GO:0070628	P:proteasomal protein catabolic process; P:modification-dependent protein catabolic process; P:protein pupylation; F:protein tag; F:proteasome binding	2.5e-16	0.63	1.1e-11	0
459	Cgl2660	ispD	2-C-methyl-D-erythritol 4-phosphate cytidylyltransferase	0	0	0	2.27	P:GO:0016114; P:GO:0019288; F:GO:0050518	P:terpenoid biosynthetic process; P:isopentenyl diphosphate biosynthetic process, methylerythritol 4-phosphate pathway; F:2-C-methyl-D-erythritol 4-phosphate cytidylyltransferase activity	0.32	0.16	0.59	2.6e-17
460	Cgl1076	pcaK	MFS transporter	0	0	0	2.26	P:GO:0055085; F:GO:0022857; C:GO:0016021	P:transmembrane transport; F:transmembrane transporter activity; C:integral component of membrane	0.66	0.52	0.00043	2.2e-08
461	Cgl1599	fmu	MFS transporter	0	0	0	2.26	P:GO:0001510; P:GO:0006355; F:GO:0003723; F:GO:0008168	P:RNA methylation; P:regulation of transcription, DNA-templated; F:RNA binding; F:methyltransferase activity	1	-0.32	0.33	3.5e-17
462	Cgl2325	rbsK2	ribokinase	0	0	0	2.26	P:GO:0019303; P:GO:0046835; F:GO:0004747; F:GO:0005524; F:GO:0046872; C:GO:0005737	P:D-ribose catabolic process; P:carbohydrate phosphorylation; F:ribokinase activity; F:ATP binding; F:metal ion binding; C:cytoplasm	0.023	1.19	1.4e-15	1e-05
463	Cgl2712	cps	amino acid adenylation protein	0	0	0	2.26	F:GO:0031177; C:GO:0016021	F:phosphopantetheine binding; C:integral component of membrane	0.0065	1.71	3.3e-16	4.1e-05
464	Cgl1898	-	peptide-methionine (R)-S-oxide reductase MsrB	0	0	0	2.25	P:GO:0006979; P:GO:0030091; F:GO:0033743	P:response to oxidative stress; P:protein repair; F:peptide-methionine (R)-S-oxide reductase activity	0.53	0.04	0.0057	4.4e-51
465	Cgl2397	pcaG	protocatechuate 3,4-dioxygenase subunit alpha	0	0	0	2.25	P:GO:0019439; F:GO:0008199; F:GO:0018578	P:aromatic compound catabolic process; F:ferric iron binding; F:protocatechuate 3,4-dioxygenase activity	0.0016	1.63	1.7e-17	3.2e-05
466	Cgl0779	-	ATP-dependent DNA helicase PcrA	0	0	0	2.24	P:GO:0006974; P:GO:0032508; P:GO:0044237; F:GO:0003677; F:GO:0003678; F:GO:0005524	P:cellular response to DNA damage stimulus; P:DNA duplex unwinding; P:cellular metabolic process; F:DNA binding; F:DNA helicase activity; F:ATP binding	0.3	1.39	2.8e-12	3.1e-05
467	Cgl1919	sigB	RNA POLYMERASE SIGMA FACTOR	0	0	0	2.24	P:GO:2000142; F:GO:0003677; F:GO:0016987	P:regulation of DNA-templated transcription, initiation; F:DNA binding; F:sigma factor activity	0	0.15	0.64	0
468	Cgl3076	-	NADPH:quinone oxidoreductase	0	0	0	2.22	F:GO:0016491	F:oxidoreductase activity	0.00055	1.5	1.4e-11	0.00016
469	Cgl0766	-	HNH endonuclease	0	0	0	2.21	P:GO:0090305; F:GO:0004519	P:nucleic acid phosphodiester bond hydrolysis; F:endonuclease activity	0.001	1.07	7e-09	3.8e-05
470	Cgl0801	prfB	peptide chain release factor 2	0	0	0	2.21	P:GO:0006415; F:GO:0016149; C:GO:0005737	P:translational termination; F:translation release factor activity, codon specific; C:cytoplasm	0.0099	0.31	0.22	1.4e-12
471	Cgl1948	-	membrane protein	0	0	0	2.21	C:GO:0016021	C:integral component of membrane	0.48	1.11	0.3	5.7e-24
472	Cgl2534	nadE	NAD synthetase	0	0	0	2.21	P:GO:0009435; F:GO:0003952; F:GO:0004359; F:GO:0005524; F:GO:0008795; F:GO:0046872; C:GO:0005737	P:NAD biosynthetic process; F:NAD+ synthase (glutamine-hydrolyzing) activity; F:glutaminase activity; F:ATP binding; F:NAD+ synthase activity; F:metal ion binding; C:cytoplasm	0.0018	-0.28	0.75	1.3e-16
473	Cgl2657	-	ArsR family transcriptional regulator	0	0	0	2.21	F:GO:0043565	F:sequence-specific DNA binding	0.44	1.19	7e-17	5.1e-05
474	Cgl2655	-	ABC transporter ATP-binding protein	0	0	0	2.2	F:GO:0005524; F:GO:0016887	F:ATP binding; F:ATPase activity	0.1	1.23	1.2e-12	8.4e-06
475	Cgl2837	tagA1	DNA-3-methyladenine glycosylase I	0	0	0	2.19	P:GO:0006284; F:GO:0008725	P:base-excision repair; F:DNA-3-methyladenine glycosylase activity	3e-14	-1.18	0.00067	5.8e-39
476	Cgl0153	-	No significant database matches	0	0	0	2.18	0	0	1.2e-06	0.69	2.2e-09	7.8e-06
477	Cgl1669	pgsA1	phosphatidylglycerophosphate synthase	0	0	0	2.18	P:GO:0008654; F:GO:0016780; F:GO:0046872; C:GO:0005886; C:GO:0016021	P:phospholipid biosynthetic process; F:phosphotransferase activity, for other substituted phosphate groups; F:metal ion binding; C:plasma membrane; C:integral component of membrane	0.9	0	0.48	3.5e-11
478	Cgl2997	-	putative secreted protein	0	0	0	2.18	0	0	0.27	-0.88	0.15	6.6e-15
479	Cgl0936	-	diguanylate cyclase	0	0	0	2.17	F:GO:0018580; F:GO:0051213	F:nitronate monooxygenase activity; F:dioxygenase activity	0.018	0.38	0.029	7.5e-09
480	Cgl2210	-	DUF4191 domain-containing protein	0	0	0	2.15	C:GO:0016021	C:integral component of membrane	6e-05	-1.98	8e-16	9.9e-51
481	Cgl1061	-	heme ABC transporter ATP-binding protein	0	0	0	2.11	F:GO:0005524; F:GO:0016887	F:ATP binding; F:ATPase activity	0.2	0.1	0.28	7.7e-10
482	Cgl1060	-	phosphonomutase	0	0	0	2.1	F:GO:0008807	F:carboxyvinyl-carboxyphosphonate phosphorylmutase activity	0.89	-0.11	0.5	4.4e-12
483	Cgl1527	-	GNAT family N-acetyltransferase	0	0	0	2.1	F:GO:0008080	F:N-acetyltransferase activity	0.66	0.59	0.0024	7.6e-08
484	Cgl1921	galE	UDP-glucose 4-epimerase	0	0	0	2.1	P:GO:0006012; F:GO:0003978	P:galactose metabolic process; F:UDP-glucose 4-epimerase activity	0.0082	-1.28	0.067	1.1e-21
485	Cgl1986	-	DNA-binding protein	0	0	-2.05	2.09	F:GO:0003677	F:DNA binding	0	-1.61	0	0
486	Cgl0952	-	ABC transporter ATP-binding protein	0	0	0	2.07	P:GO:0055085; F:GO:0005524; F:GO:0042626; C:GO:0016021	P:transmembrane transport; F:ATP binding; F:ATPase-coupled transmembrane transporter activity; C:integral component of membrane	0.0006	1.49	4.3e-12	0.00027
487	Cgl1926	-	DUF2189 domain-containing protein	0	0	0	2.07	C:GO:0016021	C:integral component of membrane	0.52	-0.67	0.0039	1.9e-19
488	Cgl2385	vanK	MFS transporter	0	0	0	2.07	P:GO:0055085; F:GO:0022857; C:GO:0016021	P:transmembrane transport; F:transmembrane transporter activity; C:integral component of membrane	0.18	0.51	0.0017	4.1e-08
489	Cgl1541	-	TetR family transcriptional regulator	0	0	0	2.06	P:GO:0006355; F:GO:0000287; F:GO:0003677	P:regulation of transcription, DNA-templated; F:magnesium ion binding; F:DNA binding	0.73	0.73	4.1e-10	3e-06
490	Cgl3028	trpP	SdpI family protein	0	0	0	2.06	C:GO:0016021	C:integral component of membrane	0.0014	0.29	0.063	5.3e-12
491	Cgl2865	-	tRNA (guanosine(46)-N7)-methyltransferase TrmB	0	0	0	2.05	P:GO:0106004; F:GO:0008176	P:tRNA (guanine-N7)-methylation; F:tRNA (guanine-N7-)-methyltransferase activity	0.049	1.24	5.1e-10	6.7e-05
492	Cgl1141	-	potassium transporter	-2.97	-3.81	0	2.04	F:GO:0004499; F:GO:0050660; F:GO:0050661	F:N,N-dimethylaniline monooxygenase activity; F:flavin adenine dinucleotide binding; F:NADP binding	0	-3.81	0	0
493	Cgl2048	-	hypothetical protein cgR_1935	0	0	0	2.03	0	0	0.025	0.7	0.06	2.7e-11
494	Cgl2322	-	peptide ABC transporter permease	0	0	0	2.02	P:GO:0055085; C:GO:0005886; C:GO:0016021	P:transmembrane transport; C:plasma membrane; C:integral component of membrane	0.43	1.52	1.3e-11	0.00029
495	Cgl0020	-	MarR family transcriptional regulator	0	2.09	2.1	0	P:GO:0045892; F:GO:0003677	P:negative regulation of transcription, DNA-templated; F:DNA binding	0.013	2.09	0	0.95
496	Cgl0027	-	ABC transporter substrate-binding protein	3.84	2.05	0	0	P:GO:0007155; P:GO:0030001; F:GO:0046872	P:cell adhesion; P:metal ion transport; F:metal ion binding	0	2.05	1.4e-16	0.013
497	Cgl0065	phoH1	PhoH family protein	2.07	2.04	0	0	F:GO:0005524; F:GO:0046872	F:ATP binding; F:metal ion binding	1.6e-06	2.04	1.6e-16	0.95
498	Cgl0073	-	MULTISPECIES: hypothetical protein	2.96	0	0	0	0	0	0	-0.01	0.0077	0.83
499	Cgl0074	-	uncharacterized conserved protein	2.79	0	0	0	F:GO:0008270	F:zinc ion binding	2.1e-15	1.77	2.7e-17	0.76
500	Cgl0103	-	membrane protein	2.46	0	0	0	C:GO:0016021	C:integral component of membrane	1.7e-12	1.38	9.7e-17	0.45
501	Cgl0172	-	sugar phosphate isomerase	0	2.22	0	0	F:GO:0016853	F:isomerase activity	0.012	2.22	6.9e-18	0.069
502	Cgl0180	-	membrane protein	2.64	0	0	0	C:GO:0016021	C:integral component of membrane	1.7e-14	0.9	2.5e-14	0.02
503	Cgl0184	gltB	glutamate synthase large subunit	2.5	2.12	0	0	P:GO:0006537; P:GO:0006541; F:GO:0004355; F:GO:0008483; F:GO:0046872; F:GO:0051538	P:glutamate biosynthetic process; P:glutamine metabolic process; F:glutamate synthase (NADPH) activity; F:transaminase activity; F:metal ion binding; F:3 iron, 4 sulfur cluster binding	3e-10	2.12	0	0.026
504	Cgl0185	gltD	glutamate synthase	2.38	0	0	0	P:GO:0006537; F:GO:0004355; F:GO:0008483; F:GO:0051536	P:glutamate biosynthetic process; F:glutamate synthase (NADPH) activity; F:transaminase activity; F:iron-sulfur cluster binding	1.7e-11	1.69	1e-14	0.17
505	Cgl0204	-	membrane protein	2.22	0	0	0	C:GO:0016021	C:integral component of membrane	1e-13	0.98	0	0.92
506	Cgl0207	-	type IV toxin-antitoxin system AbiEi family antitoxin domain-containing protein	2.31	0	0	0	0	0	1.2e-21	0.92	0	0.34
507	Cgl0253	-	putative membrane protein	2.72	0	0	0	C:GO:0016021	C:integral component of membrane	6.5e-09	1.22	1.1e-10	0.21
508	Cgl0273	cgtS1	HAMP domain-containing histidine kinase	0	2.03	2.11	0	P:GO:0000160; P:GO:0018106; F:GO:0000155; C:GO:0005886; C:GO:0016021	P:phosphorelay signal transduction system; P:peptidyl-histidine phosphorylation; F:phosphorelay sensor kinase activity; C:plasma membrane; C:integral component of membrane	5.6e-05	2.03	0	0.094
509	Cgl0286	phdB	SDR family oxidoreductase	0	2.08	2.02	0	F:GO:0004316; F:GO:0102131; F:GO:0102132	F:3-oxoacyl-[acyl-carrier-protein] reductase (NADPH) activity; F:3-oxo-glutaryl-[acp] methyl ester reductase activity; F:3-oxo-pimeloyl-[acp] methyl ester reductase activity	0.35	2.08	0	0.089
510	Cgl0299	-	Phosphoserine phosphatase	0	0	2.1	0	P:GO:0016311; F:GO:0004647; C:GO:0016021	P:dephosphorylation; F:phosphoserine phosphatase activity; C:integral component of membrane	0.019	1.99	0	0.76
511	Cgl0326	-	ribonuclease HI	0	2.01	2.13	0	P:GO:0090502; F:GO:0003676; F:GO:0004523	P:RNA phosphodiester bond hydrolysis, endonucleolytic; F:nucleic acid binding; F:RNA-DNA hybrid ribonuclease activity	0.0024	2.01	0	0.0063
512	Cgl0380	-	MFS transporter	2.1	0	0	0	P:GO:0055085; F:GO:0022857; C:GO:0005886; C:GO:0016021	P:transmembrane transport; F:transmembrane transporter activity; C:plasma membrane; C:integral component of membrane	8e-19	0.63	0.00022	0.00068
513	Cgl0388	-	HtaA domain-containing protein	2.13	0	0	0	0	0	8.2e-12	1.13	9.4e-08	0.023
514	Cgl0391	-	hemin ABC transporter ATP-binding protein	0	2.55	0	0	F:GO:0005524; F:GO:0016887	F:ATP binding; F:ATPase activity	4.1e-07	2.55	9.1e-05	0.67
515	Cgl0533	-	cobalt ABC transporter permease	0	2.02	2.06	0	C:GO:0016021	C:integral component of membrane	1.2e-05	2.02	0	1
516	Cgl0548	creE	ferredoxin	0	2.09	2.11	0	F:GO:0016491; F:GO:0050660	F:oxidoreductase activity; F:flavin adenine dinucleotide binding	0.0042	2.09	0	1
517	Cgl0554	-	IclR family transcriptional regulator	0	0	2.02	0	P:GO:0006355; F:GO:0003677	P:regulation of transcription, DNA-templated; F:DNA binding	0.00077	1.53	3.7e-18	0.49
518	Cgl0575	-	type VII secretion-associated serine protease mycosin	0	2.1	2.36	0	P:GO:0006508; F:GO:0004252; C:GO:0005886; C:GO:0016021	P:proteolysis; F:serine-type endopeptidase activity; C:plasma membrane; C:integral component of membrane	0.00073	2.1	0	0.0042
519	Cgl0666	-	iron-dicitrate transporter ATP-binding subunit	2.21	0	0	0	F:GO:0005524; F:GO:0016887	F:ATP binding; F:ATPase activity	6.9e-13	2.02	0	0.032
520	Cgl0670	-	MFS transporter	2.17	0	0	0	P:GO:0055085; F:GO:0022857; C:GO:0016021	P:transmembrane transport; F:transmembrane transporter activity; C:integral component of membrane	1.7e-09	1.73	0	0.016
521	Cgl0698	-	Cro/Cl family transcriptional regulator	0	2.02	2.15	0	P:GO:0006355; F:GO:0003677	P:regulation of transcription, DNA-templated; F:DNA binding	8.4e-05	2.02	0	0.064
522	Cgl0758	-	Hypothetical protein	0	2.89	0	0	0	0	0.4	2.89	0	3.2e-07
523	Cgl0759	-	ribosomal subunit interface protein	0	2.77	0	0	P:GO:0006417; C:GO:0005737	P:regulation of translation; C:cytoplasm	0.3	2.77	0	3.1e-37
524	Cgl0780	-	metal-dependent hydrolase	2.27	0	0	0	F:GO:0016787	F:hydrolase activity	8.4e-10	1.62	7.8e-14	0.067
525	Cgl0808	-	iron ABC transporter substrate-binding protein	0	2.03	2.24	0	0	0	3.4e-05	2.03	0	0.001
526	Cgl0823	-	aminotransferase class IV	0	0	2.06	0	F:GO:0003824	F:catalytic activity	0.00027	2	0	0.017
527	Cgl0847	nei	formamidopyrimidine-DNA glycosylase	0	2.09	2.03	0	P:GO:0006284; P:GO:0006289; P:GO:0090305; F:GO:0003684; F:GO:0004519; F:GO:0008270; F:GO:0016799; F:GO:0140078	P:base-excision repair; P:nucleotide-excision repair; P:nucleic acid phosphodiester bond hydrolysis; F:damaged DNA binding; F:endonuclease activity; F:zinc ion binding; F:hydrolase activity, hydrolyzing N-glycosyl compounds; F:class I DNA-(apurinic or apyrimidinic site) endonuclease activity	0.00091	2.09	0	1
528	Cgl0997	pabAB	aminodeoxychorismate synthase component I	0	2.02	2.1	0	P:GO:0006541; P:GO:0009396; F:GO:0046820	P:glutamine metabolic process; P:folic acid-containing compound biosynthetic process; F:4-amino-4-deoxychorismate synthase activity	0.00079	2.02	0	0.011
529	Cgl1008	-	GntR family transcriptional regulator	0	0	2.03	0	P:GO:0006355; F:GO:0003677; F:GO:0003700	P:regulation of transcription, DNA-templated; F:DNA binding; F:DNA-binding transcription factor activity	0.021	1.57	2.4e-16	0.12
530	Cgl1069	nadA	quinolinate synthetase	2.63	0	0	0	P:GO:0009435; P:GO:0019805; F:GO:0008987; F:GO:0046872; F:GO:0051539; C:GO:0005737	P:NAD biosynthetic process; P:quinolinate biosynthetic process; F:quinolinate synthetase A activity; F:metal ion binding; F:4 iron, 4 sulfur cluster binding; C:cytoplasm	0	1.02	4e-05	1
531	Cgl1089	-	2-dehydropantoate 2-reductase	0	0	2.1	0	P:GO:0015940; F:GO:0008677	P:pantothenate biosynthetic process; F:2-dehydropantoate 2-reductase activity	0.0012	1.79	3.8e-17	0.63
532	Cgl1090	-	DUF2218 domain-containing protein	0	0	2.07	0	F:GO:0016787	F:hydrolase activity	0.0041	1.91	1e-17	0.14
533	Cgl1149	cydB	cytochrome d ubiquinol oxidase subunit II	2.08	0	0	0	F:GO:0016491; C:GO:0005886; C:GO:0016021	F:oxidoreductase activity; C:plasma membrane; C:integral component of membrane	0	0.86	0.85	3.1e-09
534	Cgl1150	cydA	cytochrome ubiquinol oxidase subunit I	2.24	0	0	0	P:GO:0019646; F:GO:0009055; F:GO:0046872; C:GO:0005886; C:GO:0016021; C:GO:0070069	P:aerobic electron transport chain; F:electron transfer activity; F:metal ion binding; C:plasma membrane; C:integral component of membrane; C:cytochrome complex	0	0.73	0.44	1.8e-17
535	Cgl1156	-	DEAD/DEAH box helicase	2.75	0	0	0	P:GO:0000027; P:GO:0006401; P:GO:0070417; F:GO:0003723; F:GO:0003724; F:GO:0005524; C:GO:0005737	P:ribosomal large subunit assembly; P:RNA catabolic process; P:cellular response to cold; F:RNA binding; F:RNA helicase activity; F:ATP binding; C:cytoplasm	0	-1.19	0.0042	1.5e-08
536	Cgl1223	ssuA	ABC transporter substrate-binding protein	0	2.04	2.04	0	P:GO:0055085; F:GO:0042626; C:GO:0016020; C:GO:0042597	P:transmembrane transport; F:ATPase-coupled transmembrane transporter activity; C:membrane; C:periplasmic space	0.02	2.04	0	0.52
537	Cgl1228	-	NUDIX hydrolase	2.27	0	0	0	F:GO:0016787; F:GO:0046872	F:hydrolase activity; F:metal ion binding	3.2e-14	1.12	0	0.28
538	Cgl1257	-	ABC transporter substrate-binding protein	2.31	0	0	0	0	0	4.5e-09	1.64	2.6e-18	0.73
539	Cgl1275	-	ABC transporter ATP-binding protein	0	0	2.05	0	P:GO:1902358; F:GO:0005524; F:GO:0015419	P:sulfate transmembrane transport; F:ATP binding; F:ABC-type sulfate transporter activity	0.19	1.81	2.9e-10	0.41
540	Cgl1311	-	sulfite exporter TauE/SafE family protein	2.01	0	0	0	C:GO:0005886; C:GO:0016021	C:plasma membrane; C:integral component of membrane	0.0003	1.65	1.2e-13	1
541	Cgl1325	-	DAK2 domain-containing protein	0	2.1	2.14	0	P:GO:0006071; P:GO:0016310; F:GO:0004371	P:glycerol metabolic process; P:phosphorylation; F:glycerone kinase activity	0.021	2.1	0	0.69
542	Cgl1384	ugpE	sugar ABC transporter permease	3.96	0	0	0	P:GO:0055085; C:GO:0005886; C:GO:0016021	P:transmembrane transport; C:plasma membrane; C:integral component of membrane	0	1.34	3.5e-08	0.04
543	Cgl1387	glpQ2	glycerophosphodiester phosphodiesterase	2.17	0	0	0	P:GO:0006629; F:GO:0008889	P:lipid metabolic process; F:glycerophosphodiester phosphodiesterase activity	1.9e-06	1.82	5.5e-13	1
544	Cgl1431	-	SAM-dependent methyltransferase	0	2.06	2.02	0	P:GO:0032259; F:GO:0008168	P:methylation; F:methyltransferase activity	0.012	2.06	0	0.099
545	Cgl1439	-	alpha/beta hydrolase	2.43	0	0	0	F:GO:0016787	F:hydrolase activity	7.8e-15	1.48	2.7e-11	0.71
546	Cgl1453	-	MULTISPECIES: PaaI family thioesterase	0	0	2.03	0	P:GO:0032259; F:GO:0008168	P:methylation; F:methyltransferase activity	0.052	1.57	0	0.015
547	Cgl1482	cobG	nitrite/sulfite reductase	2.56	0	0	0	F:GO:0016491	F:oxidoreductase activity	1.3e-16	1.3	0	0.099
548	Cgl1556	nanH	exo-alpha-sialidase	0	2.01	2.19	0	P:GO:0008152; F:GO:0052794; F:GO:0052795; F:GO:0052796; C:GO:0016021	P:metabolic process; F:exo-alpha-(2->3)-sialidase activity; F:exo-alpha-(2->6)-sialidase activity; F:exo-alpha-(2->8)-sialidase activity; C:integral component of membrane	0.098	2.01	0	0.82
549	Cgl1637	-	DEAD/DEAH box helicase	2.1	0	0	0	P:GO:0008152; F:GO:0004339; F:GO:0004386; F:GO:0005524	P:metabolic process; F:glucan 1,4-alpha-glucosidase activity; F:helicase activity; F:ATP binding	1.7e-08	1.56	4.3e-16	1
550	Cgl1892	-	DASS family sodium-coupled anion symporter	2.17	0	0	0	P:GO:0055085; F:GO:0022857; C:GO:0016021	P:transmembrane transport; F:transmembrane transporter activity; C:integral component of membrane	6.3e-07	1.33	1.8e-16	0.45
551	Cgl1957	-	Hypothetical protein	2.03	0	0	0	0	0	1.5e-05	0.95	1.1e-06	0.85
552	Cgl1958	-	biotin transporter BioY	2.92	0	0	0	P:GO:0015878; F:GO:0015225; C:GO:0005886; C:GO:0016021	P:biotin transport; F:biotin transmembrane transporter activity; C:plasma membrane; C:integral component of membrane	0	0.68	3.8e-06	0.74
553	Cgl1959	-	ABC transporter ATP-binding protein	2.28	0	0	0	P:GO:0006810; F:GO:0005524; F:GO:0016887	P:transport; F:ATP binding; F:ATPase activity	2.6e-10	1.17	4.4e-10	0.011
554	Cgl2036	-	Hypothetical protein	2.06	0	0	0	C:GO:0016021	C:integral component of membrane	0.00015	1.75	4.1e-11	0.021
555	Cgl2066	-	acylphosphatase	0	2.11	2.04	0	F:GO:0003998	F:acylphosphatase activity	0.013	2.11	2.8e-18	0.32
556	Cgl2084	-	putative membrane protein, putative carbohydrate phosphorylase	0	2.04	2.28	0	C:GO:0016021	C:integral component of membrane	0.0074	2.04	0	0.46
557	Cgl2141	-	ABC transporter ATPase	0	2.02	2.08	0	F:GO:0005524; F:GO:0016887	F:ATP binding; F:ATPase activity	2.2e-06	2.02	0	0.0089
558	Cgl2222	-	MFS transporter	2.28	0	0	0	P:GO:0055085; F:GO:0022857; C:GO:0016021	P:transmembrane transport; F:transmembrane transporter activity; C:integral component of membrane	1.2e-16	0.9	2.6e-05	0.3
559	Cgl2232	-	SPOR domain-containing protein	2.24	0	0	0	0	0	0	0.73	0.92	0.011
560	Cgl2302	-	carboxylesterase	0	2.14	0	0	F:GO:0016787	F:hydrolase activity	0.05	2.14	2.3e-14	0.87
561	Cgl2315	glcD	FAD-binding oxidoreductase	0	2.41	0	0	P:GO:0032259; F:GO:0008168; F:GO:0019154; F:GO:0046872; F:GO:0051536; F:GO:0071949	P:methylation; F:methyltransferase activity; F:glycolate dehydrogenase activity; F:metal ion binding; F:iron-sulfur cluster binding; F:FAD binding	0.012	2.41	0	0.0066
562	Cgl2317	-	membrane protein	0	0	2.31	0	C:GO:0016021	C:integral component of membrane	0.063	1.99	0	0.082
563	Cgl2336	-	lamin tail domain-containing protein	2.63	0	0	0	C:GO:0016021	C:integral component of membrane	2.4e-19	1.11	4.8e-08	0.083
564	Cgl2396	pcaB	3-carboxy-cis,cis-muconate cycloisomerase	0	2.06	2.13	0	P:GO:0019619; F:GO:0018842; F:GO:0047472	P:3,4-dihydroxybenzoate catabolic process; F:3-carboxymuconate cycloisomerase type II activity; F:3-carboxy-cis,cis-muconate cycloisomerase activity	0.012	2.06	1.8e-17	0.062
565	Cgl2408	-	LuxR family transcriptional regulator	0	0	2.02	0	P:GO:0006355; F:GO:0003677	P:regulation of transcription, DNA-templated; F:DNA binding	0.031	2	0	0.0015
566	Cgl2417	-	RDD family protein	2.76	0	0	0	C:GO:0016021	C:integral component of membrane	1.3e-09	1.41	4e-09	0.13
567	Cgl2456	-	copper resistance protein	2.34	0	0	0	P:GO:0006825; C:GO:0005886; C:GO:0016021	P:copper ion transport; C:plasma membrane; C:integral component of membrane	1.2e-21	0.63	1.7e-05	2.5e-06
568	Cgl2478	-	MULTISPECIES: hypothetical protein	2.08	0	0	0	0	0	0.00076	1.33	3.1e-08	0.19
569	Cgl2483	-	transcriptional regulator	0	2.1	2.33	0	P:GO:0006355; F:GO:0003677	P:regulation of transcription, DNA-templated; F:DNA binding	8.2e-06	2.1	0	0.23
570	Cgl2492	-	MFS transporter permease	2.24	2.01	0	0	P:GO:0055085; F:GO:0022857; C:GO:0005886; C:GO:0016021	P:transmembrane transport; F:transmembrane transporter activity; C:plasma membrane; C:integral component of membrane	3.2e-08	2.01	4.5e-18	0.27
571	Cgl2536	-	pyridoxamine 5-phosphate oxidase	0	2.18	0	0	0	0	0.00074	2.18	6.9e-05	4.1e-20
572	Cgl2572	pstB	glutamate ABC transporter ATP-binding protein	4.59	0	0	0	P:GO:0035435; F:GO:0005315; F:GO:0005524; F:GO:0015415; C:GO:0005886	P:phosphate ion transmembrane transport; F:inorganic phosphate transmembrane transporter activity; F:ATP binding; F:ATPase-coupled phosphate ion transmembrane transporter activity; C:plasma membrane	0	1.6	1.1e-11	1
573	Cgl2573	pstA	phosphate ABC transporter permease	5.06	0	0	0	P:GO:0035435; F:GO:0005315; C:GO:0005887	P:phosphate ion transmembrane transport; F:inorganic phosphate transmembrane transporter activity; C:integral component of plasma membrane	0	1.19	1.7e-08	0.41
574	Cgl2575	pstS	phosphate ABC transporter substrate-binding protein PstS	4.5	0	0	0	P:GO:0035435; F:GO:0042301; C:GO:0043190	P:phosphate ion transmembrane transport; F:phosphate ion binding; C:ATP-binding cassette (ABC) transporter complex	0	0.9	0.00044	1
575	Cgl2592	nuc	ExeM/NucH family extracellular endonuclease	3.51	0	0	0	P:GO:0016311; P:GO:0090305; F:GO:0004519; F:GO:0008253; C:GO:0016021	P:dephosphorylation; P:nucleic acid phosphodiester bond hydrolysis; F:endonuclease activity; F:5'-nucleotidase activity; C:integral component of membrane	0	1.73	4.5e-13	0.0038
576	Cgl2628	-	ABC transporter substrate-binding protein	2.15	0	0	0	P:GO:0007155; P:GO:0030001; F:GO:0046872	P:cell adhesion; P:metal ion transport; F:metal ion binding	0	-1.27	3.1e-07	3.2e-05
577	Cgl2645	nagA1	N-acetylglucosamine-6-phosphate deacetylase	0	0	2.14	0	P:GO:0005975; P:GO:0006044; F:GO:0008448; F:GO:0046872; F:GO:0047419	P:carbohydrate metabolic process; P:N-acetylglucosamine metabolic process; F:N-acetylglucosamine-6-phosphate deacetylase activity; F:metal ion binding; F:N-acetylgalactosamine-6-phosphate deacetylase activity	0.088	1.93	0	0.067
578	Cgl2794	-	MULTISPECIES: hypothetical protein	2.38	0	0	0	0	0	8e-17	1.19	1.4e-13	0.0013
579	Cgl2849	-	hypothetical protein cgR_5056	2.02	0	0	0	0	0	2.3e-15	0.85	3e-07	0.87
580	Cgl3059	-	IclR family transcriptional regulator	0	2.02	2.08	0	P:GO:0006355; F:GO:0003677	P:regulation of transcription, DNA-templated; F:DNA binding	0.069	2.02	0	0.85
581	Cgl3082	azlD	branched-chain amino acid ABC transporter permease	0	2.29	0	0	F:GO:0047134; C:GO:0016021	F:protein-disulfide reductase activity; C:integral component of membrane	0.032	2.29	4.8e-16	0.12
582	Cgl0792	-	hypothetical protein cgp_0902	2.19	0	0	-2.04	0	0	1.8e-17	0.18	5.1e-14	0.00054
583	Cgl2574	pstC	phosphate ABC transporter permease	4.36	0	0	-3.54	P:GO:0006817; P:GO:0055085; F:GO:0005315; C:GO:0005886; C:GO:0016021	P:phosphate ion transport; P:transmembrane transport; F:inorganic phosphate transmembrane transporter activity; C:plasma membrane; C:integral component of membrane	0	1.26	7.7e-09	1.1e-06
584	Cgl2193	-	hypothetical protein C624_10620	2.79	0	0	-1000000	0	0	0	0.96	9.3e-19	2.5e-11
585	Cgl0006	gyrB	DNA gyrase subunit B	0	-2.47	-2.35	0	P:GO:0006261; P:GO:0006265; F:GO:0003677; F:GO:0003918; F:GO:0005524; F:GO:0046872; C:GO:0005694; C:GO:0005737	P:DNA-dependent DNA replication; P:DNA topological change; F:DNA binding; F:DNA topoisomerase type II (double strand cut, ATP-hydrolyzing) activity; F:ATP binding; F:metal ion binding; C:chromosome; C:cytoplasm	8.5e-17	-2.47	0	0
586	Cgl0032	-	sugar ABC transporter ATP-binding protein	0	-2.25	-2.41	0	P:GO:0071702; F:GO:0005524; F:GO:0016887	P:organic substance transport; F:ATP binding; F:ATPase activity	2.6e-15	-2.25	0	0.068
587	Cgl0033	-	hypothetical protein cgR_0047	0	-2.28	-3.31	0	C:GO:0016021	C:integral component of membrane	0	-2.28	0	0.0021
588	Cgl0067	citP	citrate:proton symporter	0	2.07	0	0	P:GO:0055085; C:GO:0016021	P:transmembrane transport; C:integral component of membrane	0.11	2.07	0	1
589	Cgl0092	-	MFS transporter	0	2.02	0	0	P:GO:0055085; F:GO:0022857; C:GO:0016021	P:transmembrane transport; F:transmembrane transporter activity; C:integral component of membrane	0.012	2.02	0	0.94
590	Cgl0174	cspA	cold-shock protein	0	-2.47	-3.07	0	F:GO:0003676; C:GO:0005737	F:nucleic acid binding; C:cytoplasm	0.38	-2.47	0	0
591	Cgl0229	-	CsbD family protein	0	-3.76	-4.33	0	0	0	1.3e-13	-3.76	0	0
592	Cgl0255	katA	catalase	-2.07	-2.45	0	0	P:GO:0006979; P:GO:0042744; P:GO:0098869; F:GO:0000166; F:GO:0004096; F:GO:0020037; F:GO:0046872	P:response to oxidative stress; P:hydrogen peroxide catabolic process; P:cellular oxidant detoxification; F:nucleotide binding; F:catalase activity; F:heme binding; F:metal ion binding	0	-2.45	0	7.9e-86
593	Cgl0279	whiB4	WhiB family transcriptional regulator	-2.02	0	0	0	P:GO:0006355; F:GO:0003677; F:GO:0035731; F:GO:0046872; F:GO:0051539; C:GO:0005737	P:regulation of transcription, DNA-templated; F:DNA binding; F:dinitrosyl-iron complex binding; F:metal ion binding; F:4 iron, 4 sulfur cluster binding; C:cytoplasm	3.1e-20	-0.82	2e-08	1.5e-12
594	Cgl0282	-	RidA family protein	-2.2	0	-2.28	0	0	0	0	-1.88	0	0.0006
595	Cgl0291	-	Crp/Fnr family transcriptional regulator	0	-3.15	-3.37	0	P:GO:0016310; P:GO:0045892; P:GO:0045893; P:GO:2000874; F:GO:0000976; F:GO:0001216; F:GO:0001217; F:GO:0016301; F:GO:0030552; C:GO:0032993	P:phosphorylation; P:negative regulation of transcription, DNA-templated; P:positive regulation of transcription, DNA-templated; P:regulation of glyoxylate cycle; F:transcription regulatory region sequence-specific DNA binding; F:DNA-binding transcription activator activity; F:DNA-binding transcription repressor activity; F:kinase activity; F:cAMP binding; C:protein-DNA complex	0	-3.15	0	0
596	Cgl0304	-	DUF4244 domain-containing protein	0	2.01	0	0	C:GO:0016021	C:integral component of membrane	0.03	2.01	0	0.0022
597	Cgl0308	cspA2	cold-shock protein	0	-3.19	-3.17	0	F:GO:0003676; C:GO:0005737	F:nucleic acid binding; C:cytoplasm	2.9e-05	-3.19	0	0
598	Cgl0310	-	lysoplasmalogenase	0	2.12	0	0	C:GO:0016021	C:integral component of membrane	0.02	2.12	1.1e-15	0.13
599	Cgl0319	fadH	alcohol dehydrogenase	0	-2.38	-2.57	0	F:GO:0008270; F:GO:0050607	F:zinc ion binding; F:mycothiol-dependent formaldehyde dehydrogenase activity	0	-2.38	0	2.9e-05
600	Cgl0320	-	Zn-dependent hydrolase	0	-3.79	-3.64	0	F:GO:0016787	F:hydrolase activity	0	-3.79	0	0
601	Cgl0331	adhC	alcohol dehydrogenase	0	0	-2.27	0	F:GO:0004022; F:GO:0008270; F:GO:0045551; F:GO:0052747	F:alcohol dehydrogenase (NAD+) activity; F:zinc ion binding; F:cinnamyl-alcohol dehydrogenase activity; F:sinapyl alcohol dehydrogenase activity	6.9e-12	-1.97	0	1.6e-14
602	Cgl0342	-	FUSC family protein	0	-2.27	0	0	C:GO:0005886; C:GO:0016021	C:plasma membrane; C:integral component of membrane	0.00047	-2.27	3.9e-07	1.4e-07
603	Cgl0343	cmt1	esterase	0	-3.78	-3.83	0	F:GO:0016740	F:transferase activity	0	-3.78	0	0
604	Cgl0378	-	DUF2516 family protein	0	0	-2.42	0	C:GO:0016021	C:integral component of membrane	1.8e-18	-1.12	0	2.7e-07
605	Cgl0394	-	DUF2993 domain-containing protein	0	-2.17	0	0	C:GO:0016021	C:integral component of membrane	4.7e-07	-2.17	0	4.5e-11
606	Cgl0475	nusG	transcription termination/antitermination protein NusG	0	-3.22	-3.2	0	P:GO:0031564; P:GO:0032784	P:transcription antitermination; P:regulation of DNA-templated transcription, elongation	1e-12	-3.22	0	0.0014
607	Cgl0476	rplK	50S ribosomal protein L11	0	-4.61	-4.32	0	P:GO:0006412; F:GO:0003735; F:GO:0070180; C:GO:0005840	P:translation; F:structural constituent of ribosome; F:large ribosomal subunit rRNA binding; C:ribosome	0	-4.61	0	0
608	Cgl0477	rplA	50S ribosomal protein L1	0	-4.19	-4.38	0	P:GO:0006417; F:GO:0000049; F:GO:0003735; F:GO:0019843; C:GO:0015934	P:regulation of translation; F:tRNA binding; F:structural constituent of ribosome; F:rRNA binding; C:large ribosomal subunit	0	-4.19	0	0
609	Cgl0488	rpoB	DNA-directed RNA polymerase subunit beta	0	-3.27	0	0	P:GO:0006351; F:GO:0003677; F:GO:0003899; F:GO:0032549	P:transcription, DNA-templated; F:DNA binding; F:DNA-directed 5'-3' RNA polymerase activity; F:ribonucleoside binding	0	-3.27	0	1e-93
610	Cgl0489	rpoC	DNA-directed RNA polymerase subunit beta'	0	-3.51	-2.97	0	P:GO:0006351; F:GO:0000287; F:GO:0003677; F:GO:0003899; F:GO:0008270	P:transcription, DNA-templated; F:magnesium ion binding; F:DNA binding; F:DNA-directed 5'-3' RNA polymerase activity; F:zinc ion binding	5.6e-12	-3.51	0	8.3e-13
611	Cgl0492	-	DUF1707 and DUF2154 domain-containing protein	0	-2.59	-2.51	0	0	0	0	-2.59	0	0
612	Cgl0493	rpsL	30S ribosomal protein S12	-2.5	-4.8	-4.23	0	P:GO:0006412; F:GO:0000049; F:GO:0003735; F:GO:0019843; C:GO:0015935	P:translation; F:tRNA binding; F:structural constituent of ribosome; F:rRNA binding; C:small ribosomal subunit	0	-4.8	0	0
613	Cgl0494	rpsG	30S ribosomal protein S7	0	-4.32	-4.19	0	P:GO:0006412; F:GO:0000049; F:GO:0003735; F:GO:0019843; C:GO:0015935	P:translation; F:tRNA binding; F:structural constituent of ribosome; F:rRNA binding; C:small ribosomal subunit	0	-4.32	0	0
614	Cgl0504	rpsJ	30S ribosomal protein S10	-2.3	-5.53	-3.93	0	P:GO:0006412; F:GO:0000049; F:GO:0003735; C:GO:0005840	P:translation; F:tRNA binding; F:structural constituent of ribosome; C:ribosome	0	-5.53	0	0
615	Cgl0505	rplC	50S ribosomal protein L3	0	-5.29	-4.28	0	P:GO:0006412; F:GO:0003735; F:GO:0019843; C:GO:0005840	P:translation; F:structural constituent of ribosome; F:rRNA binding; C:ribosome	0	-5.29	0	0
616	Cgl0506	-	50S ribosomal protein L3	0	-5.26	-4.22	0	P:GO:0006412; F:GO:0003735; F:GO:0019843; C:GO:0005840	P:translation; F:structural constituent of ribosome; F:rRNA binding; C:ribosome	0	-5.26	0	0
617	Cgl0514	rpsC	30S ribosomal protein S3	0	-5	-4.97	0	P:GO:0006412; F:GO:0003729; F:GO:0003735; F:GO:0019843; C:GO:0005840	P:translation; F:mRNA binding; F:structural constituent of ribosome; F:rRNA binding; C:ribosome	0	-5	0	0
618	Cgl0522	rplX	50S ribosomal protein L24	0	-5.15	-4.74	0	P:GO:0006412; F:GO:0003735; F:GO:0019843; C:GO:0005840	P:translation; F:structural constituent of ribosome; F:rRNA binding; C:ribosome	0	-5.15	0	0
619	Cgl0523	rplE	50S ribosomal protein L5	0	-5.35	-4.9	0	P:GO:0006412; F:GO:0000049; F:GO:0003735; F:GO:0019843; C:GO:0005840	P:translation; F:tRNA binding; F:structural constituent of ribosome; F:rRNA binding; C:ribosome	0	-5.35	0	0
620	Cgl0555	secY	preprotein translocase subunit SecY	0	-2.59	-2.27	0	P:GO:0006605; P:GO:0043952; P:GO:0065002; C:GO:0005886; C:GO:0016021	P:protein targeting; P:protein transport by the Sec complex; P:intracellular protein transmembrane transport; C:plasma membrane; C:integral component of membrane	0.012	-2.59	0	0
621	Cgl0556	adk	adenylate kinase	0	-3.06	-3.42	0	P:GO:0016310; P:GO:0044209; P:GO:0046940; F:GO:0004017; F:GO:0005524; C:GO:0005737	P:phosphorylation; P:AMP salvage; P:nucleoside monophosphate phosphorylation; F:adenylate kinase activity; F:ATP binding; C:cytoplasm	1.8e-10	-3.06	0	0
622	Cgl0557	-	adenylate kinase	0	-2.97	-3.33	0	P:GO:0016310; P:GO:0044209; P:GO:0046940; F:GO:0004017; F:GO:0005524; C:GO:0005737	P:phosphorylation; P:AMP salvage; P:nucleoside monophosphate phosphorylation; F:adenylate kinase activity; F:ATP binding; C:cytoplasm	2.7e-09	-2.97	0	0
623	Cgl0581	rplM	50S ribosomal protein L13	0	-4.65	-4.49	0	P:GO:0006412; F:GO:0003735; C:GO:0005840	P:translation; F:structural constituent of ribosome; C:ribosome	0	-4.65	0	0
624	Cgl0582	rpsI	30S ribosomal protein S9	0	-4.9	-4.3	0	P:GO:0006412; F:GO:0003735; C:GO:0005840	P:translation; F:structural constituent of ribosome; C:ribosome	0	-4.9	0	0
625	Cgl0583	-	phosphoglucosamine mutase	0	-2.06	0	0	P:GO:0005975; F:GO:0000287; F:GO:0008966	P:carbohydrate metabolic process; F:magnesium ion binding; F:phosphoglucosamine mutase activity	0.026	-2.06	0	1.2e-07
626	Cgl0590	-	transporter	0	2.04	0	0	P:GO:0006813; P:GO:0098655; F:GO:0008324; C:GO:0005886; C:GO:0016021	P:potassium ion transport; P:cation transmembrane transport; F:cation transmembrane transporter activity; C:plasma membrane; C:integral component of membrane	9.9e-25	2.04	0.25	0.13
627	Cgl0601	-	MULTISPECIES: hypothetical protein	0	0	-2.28	0	C:GO:0016021	C:integral component of membrane	0.00013	-1.38	0	0.0067
628	Cgl0603	guaB2	inosine-5-monophosphate dehydrogenase	0	-2.11	-2.38	0	P:GO:0006177; F:GO:0000166; F:GO:0003938; F:GO:0046872	P:GMP biosynthetic process; F:nucleotide binding; F:IMP dehydrogenase activity; F:metal ion binding	0.0008	-2.11	0	0
629	Cgl0607	guaA	GMP synthase	0	-2.38	-2.51	0	P:GO:0006177; P:GO:0006541; F:GO:0003922; F:GO:0005524; F:GO:0016462	P:GMP biosynthetic process; P:glutamine metabolic process; F:GMP synthase (glutamine-hydrolyzing) activity; F:ATP binding; F:pyrophosphatase activity	0.041	-2.38	0	1.3e-07
630	Cgl0618	-	putative secreted protein	0	0	-2.03	0	0	0	1e-13	-1.85	0	0.00016
631	Cgl0621	crtYf	C50 carotenoid epsilon cyclase	0	-2.08	0	0	P:GO:0016117; F:GO:0016872; C:GO:0016021	P:carotenoid biosynthetic process; F:intramolecular lyase activity; C:integral component of membrane	0.44	-2.08	0.0042	0.029
632	Cgl0624	crtB	phytoene synthase	0	-2.7	0	0	P:GO:0009058; F:GO:0004310; F:GO:0051996	P:biosynthetic process; F:farnesyl-diphosphate farnesyltransferase activity; F:squalene synthase activity	0.34	-2.7	3.8e-06	0.94
633	Cgl0648	folD	bifunctional methylenetetrahydrofolate dehydrogenase/methenyltetrahydrofolate cyclohydrolase	0	0	-2.04	0	P:GO:0000105; P:GO:0006164; P:GO:0009086; P:GO:0035999; F:GO:0004477; F:GO:0004488	P:histidine biosynthetic process; P:purine nucleotide biosynthetic process; P:methionine biosynthetic process; P:tetrahydrofolate interconversion; F:methenyltetrahydrofolate cyclohydrolase activity; F:methylenetetrahydrofolate dehydrogenase (NADP+) activity	0.005	-1.88	0	0.094
634	Cgl0649	-	membrane protein	0	-2.66	-2.33	0	C:GO:0016021	C:integral component of membrane	0	-2.66	0	5e-13
635	Cgl0651	-	DUF3500 domain-containing protein	0	-2.07	-2.28	0	0	0	3.4e-06	-2.07	0	0
636	Cgl0679	-	RDD family protein	0	-2.94	-3.25	0	C:GO:0016021	C:integral component of membrane	5.1e-11	-2.94	0	0
637	Cgl0703	-	DUF3151 domain-containing protein	0	-2.22	-2.03	0	0	0	2.9e-14	-2.22	0	3.4e-15
638	Cgl0706	-	acyl-CoA carboxylase subunit epsilon	-2.26	-2.88	-2.99	0	0	0	0	-2.88	0	0
639	Cgl0707	dtsR2	methylmalonyl-CoA carboxyltransferase	0	-3.34	-3.08	0	F:GO:0004658; F:GO:0016740; C:GO:0016021	F:propionyl-CoA carboxylase activity; F:transferase activity; C:integral component of membrane	0	-3.34	0	2e-16
640	Cgl0751	-	MULTISPECIES: hypothetical protein	0	0	-2.22	0	0	0	0	-1.29	0	0.81
641	Cgl0752	sahH	S-adenosyl-L-homocysteine hydrolase	0	0	-2.04	0	P:GO:0006730; F:GO:0004013; C:GO:0005737	P:one-carbon metabolic process; F:adenosylhomocysteinase activity; C:cytoplasm	5.9e-05	-1.34	0	0.24
642	Cgl0754	mtrA	DNA-binding response regulator	0	0	-2.08	0	P:GO:0000160; P:GO:0006355; F:GO:0003677	P:phosphorelay signal transduction system; P:regulation of transcription, DNA-templated; F:DNA binding	1e-16	-1.87	0	1.4e-06
643	Cgl0760	secA	preprotein translocase subunit SecA	0	-2.3	-2.36	0	P:GO:0006605; P:GO:0017038; P:GO:0065002; F:GO:0004386; F:GO:0005524; C:GO:0005737; C:GO:0005886	P:protein targeting; P:protein import; P:intracellular protein transmembrane transport; F:helicase activity; F:ATP binding; C:cytoplasm; C:plasma membrane	2.6e-09	-2.3	0	0
644	Cgl0764	aroA	3-phosphoshikimate 1-carboxyvinyltransferase	0	0	-2.03	0	P:GO:0006508; P:GO:0006974; P:GO:0008652; P:GO:0009073; P:GO:0009423; P:GO:0018142; F:GO:0003697; F:GO:0003866; F:GO:0008233; C:GO:0005737	P:proteolysis; P:cellular response to DNA damage stimulus; P:cellular amino acid biosynthetic process; P:aromatic amino acid family biosynthetic process; P:chorismate biosynthetic process; P:protein-DNA covalent cross-linking; F:single-stranded DNA binding; F:3-phosphoshikimate 1-carboxyvinyltransferase activity; F:peptidase activity; C:cytoplasm	0.00031	-1.92	0	0.00092
645	Cgl0772	-	MULTISPECIES: DUF3107 domain-containing protein	0	-2.03	-2.1	0	0	0	0.0062	-2.03	0	0.12
646	Cgl0820	-	cold-shock protein	0	-3.06	-3	0	F:GO:0003676	F:nucleic acid binding	0.00095	-3.06	0	0
647	Cgl0830	fkpA	MULTISPECIES: FKBP-type peptidyl-prolyl cis-trans isomerase	0	-2.59	-2.75	0	P:GO:0000413; F:GO:0003755	P:protein peptidyl-prolyl isomerization; F:peptidyl-prolyl cis-trans isomerase activity	0	-2.59	0	0.47
648	Cgl0841	-	MULTISPECIES: hypothetical protein	0	0	-3.02	0	0	0	0	-0.83	0	0.68
649	Cgl0844	thyA	thymidylate synthase	0	-3.01	-2.65	0	P:GO:0006231; P:GO:0006235; P:GO:0032259; F:GO:0004799; C:GO:0005737	P:dTMP biosynthetic process; P:dTTP biosynthetic process; P:methylation; F:thymidylate synthase activity; C:cytoplasm	1.2e-17	-3.01	0	3.8e-12
650	Cgl0858	-	M23 family metallopeptidase	0	0	-2.52	0	C:GO:0016021	C:integral component of membrane	0	-1.09	0	3.3e-13
651	Cgl0861	purH	bifunctional phosphoribosylaminoimidazolecarboxamide formyltransferase/IMP cyclohydrolase	0	0	-2.1	0	P:GO:0006189; F:GO:0003937; F:GO:0004643	P:'de novo' IMP biosynthetic process; F:IMP cyclohydrolase activity; F:phosphoribosylaminoimidazolecarboxamide formyltransferase activity	0.53	-1.14	0	0.052
652	Cgl0873	rpmF	50S ribosomal protein L32	0	-3.45	-3.89	0	P:GO:0006412; F:GO:0003735; C:GO:0015934	P:translation; F:structural constituent of ribosome; C:large ribosomal subunit	0	-3.45	0	0
653	Cgl0877	-	molybdenum cofactor biosynthesis protein	0	-2.69	-3.08	0	0	0	0	-2.69	0	0
654	Cgl0889	-	alpha-amylase	0	-2.33	-2.23	0	P:GO:0005975; F:GO:0047798	P:carbohydrate metabolic process; F:cyclomaltodextrinase activity	4.5e-08	-2.33	0	3.3e-16
655	Cgl0917	pvdS1	polyphosphate kinase 2	0	-2.82	-2.28	0	P:GO:0016310; F:GO:0008976	P:phosphorylation; F:polyphosphate kinase activity	1.2e-15	-2.82	0	0
656	Cgl0942	prsA	ribose-phosphate pyrophosphokinase	0	-3.19	-3.46	0	P:GO:0006015; P:GO:0009116; P:GO:0009156; P:GO:0009165; P:GO:0016310; F:GO:0000287; F:GO:0004749; F:GO:0005524; F:GO:0016301; C:GO:0005737	P:5-phosphoribose 1-diphosphate biosynthetic process; P:nucleoside metabolic process; P:ribonucleoside monophosphate biosynthetic process; P:nucleotide biosynthetic process; P:phosphorylation; F:magnesium ion binding; F:ribose phosphate diphosphokinase activity; F:ATP binding; F:kinase activity; C:cytoplasm	2.5e-14	-3.19	0	0
657	Cgl0949	cgtR10	LuxR family transcriptional regulator	0	-2.3	-2.4	0	P:GO:0000160; P:GO:0006355; F:GO:0003677	P:phosphorelay signal transduction system; P:regulation of transcription, DNA-templated; F:DNA binding	0.00017	-2.3	0	0.0085
658	Cgl0974	eno	enolase	0	0	-3.95	0	P:GO:0006096; F:GO:0000287; F:GO:0004634; C:GO:0000015; C:GO:0005576; C:GO:0009986	P:glycolytic process; F:magnesium ion binding; F:phosphopyruvate hydratase activity; C:phosphopyruvate hydratase complex; C:extracellular region; C:cell surface	0	-1.5	0	0
659	Cgl0983	-	Bax inhibitor-1/YccA family protein	0	-2.38	-3.52	0	C:GO:0016021	C:integral component of membrane	0	-2.38	0	0
660	Cgl0988	-	mycothiol conjugate amidase Mca	0	-2.01	0	0	P:GO:0010126; P:GO:0010127; F:GO:0008270; F:GO:0016787	P:mycothiol metabolic process; P:mycothiol-dependent detoxification; F:zinc ion binding; F:hydrolase activity	2.5e-06	-2.01	1.1e-14	1.9e-06
661	Cgl0990	aroF	3-deoxy-7-phosphoheptulonate synthase	0	-2.08	-2.02	0	P:GO:0008652; P:GO:0009073; P:GO:0009423; F:GO:0003849	P:cellular amino acid biosynthetic process; P:aromatic amino acid family biosynthetic process; P:chorismate biosynthetic process; F:3-deoxy-7-phosphoheptulonate synthase activity	1.9e-08	-2.08	0	0
662	Cgl0996	glyA	serine hydroxymethyltransferase	0	-4.38	-4.3	0	P:GO:0019264; P:GO:0032259; P:GO:0035999; F:GO:0004372; F:GO:0008168; F:GO:0030170; C:GO:0005737	P:glycine biosynthetic process from serine; P:methylation; P:tetrahydrofolate interconversion; F:glycine hydroxymethyltransferase activity; F:methyltransferase activity; F:pyridoxal phosphate binding; C:cytoplasm	0	-4.38	0	0
663	Cgl1086	tpx	thiol peroxidase	-2.41	-3.63	-3.78	0	P:GO:0098869; F:GO:0008379	P:cellular oxidant detoxification; F:thioredoxin peroxidase activity	0	-3.63	0	0
664	Cgl1129	odhA	alpha-ketoglutarate decarboxylase	0	-2.1	-2.69	0	P:GO:0006099; F:GO:0004149; F:GO:0004591; F:GO:0005515; F:GO:0008683; F:GO:0030976; F:GO:0046872	P:tricarboxylic acid cycle; F:dihydrolipoyllysine-residue succinyltransferase activity; F:oxoglutarate dehydrogenase (succinyl-transferring) activity; F:protein binding; F:2-oxoglutarate decarboxylase activity; F:thiamine pyrophosphate binding; F:metal ion binding	0	-2.1	0	1.1e-10
665	Cgl1132	aroE2	shikimate 5-dehydrogenase	0	-2.62	-2.38	0	P:GO:0046394; F:GO:0004764	P:carboxylic acid biosynthetic process; F:shikimate 3-dehydrogenase (NADP+) activity	2.6e-08	-2.62	0	1.2e-15
666	Cgl1183	hom	homoserine dehydrogenase	0	-2.87	-2.91	0	P:GO:0009086; P:GO:0009088; P:GO:0009097; F:GO:0004412; F:GO:0050661	P:methionine biosynthetic process; P:threonine biosynthetic process; P:isoleucine biosynthetic process; F:homoserine dehydrogenase activity; F:NADP binding	0	-2.87	0	0
667	Cgl1184	thrB	homoserine kinase	0	-2.34	-2.13	0	P:GO:0009088; P:GO:0016310; F:GO:0004413; F:GO:0005524; C:GO:0005737	P:threonine biosynthetic process; P:phosphorylation; F:homoserine kinase activity; F:ATP binding; C:cytoplasm	1.2e-09	-2.34	0	0.097
668	Cgl1213	atpC	F0F1 ATP synthase subunit epsilon	0	-2.95	-3.55	0	P:GO:0015986; F:GO:0005524; F:GO:0016787; F:GO:0046933; C:GO:0005886; C:GO:0045261	P:ATP synthesis coupled proton transport; F:ATP binding; F:hydrolase activity; F:proton-transporting ATP synthase activity, rotational mechanism; C:plasma membrane; C:proton-transporting ATP synthase complex, catalytic core F(1)	3.4e-07	-2.95	0	0
669	Cgl1225	glgE	alpha-1,4-glucan--maltose-1-phosphate maltosyltransferase	0	0	-2.18	0	P:GO:0030979; F:GO:0004553; F:GO:0016758	P:alpha-glucan biosynthetic process; F:hydrolase activity, hydrolyzing O-glycosyl compounds; F:transferase activity, transferring hexosyl groups	1.6e-10	-1.88	0	2.6e-16
670	Cgl1230	fixA	electron transfer flavoprotein subunit beta	0	-3.12	-2.84	0	P:GO:0022900; F:GO:0009055	P:electron transport chain; F:electron transfer activity	0	-3.12	0	0
671	Cgl1231	fixB	electron transfer flavoprotein subunit alpha	0	0	-2.02	0	P:GO:0022900; F:GO:0009055; F:GO:0050660	P:electron transport chain; F:electron transfer activity; F:flavin adenine dinucleotide binding	6.1e-06	-2	0	0.19
672	Cgl1249	-	putative membrane protein	-2.09	-2.63	-2.6	0	C:GO:0016021	C:integral component of membrane	0	-2.63	0	0
673	Cgl1250	pfkA	6-phosphofructokinase	0	-2.74	-2.76	0	P:GO:0006002; P:GO:0046835; P:GO:0061615; F:GO:0003872; F:GO:0005524; F:GO:0046872; F:GO:0047334; C:GO:0005737	P:fructose 6-phosphate metabolic process; P:carbohydrate phosphorylation; P:glycolytic process through fructose-6-phosphate; F:6-phosphofructokinase activity; F:ATP binding; F:metal ion binding; F:diphosphate-fructose-6-phosphate 1-phosphotransferase activity; C:cytoplasm	0.00039	-2.74	0	0
674	Cgl1282	-	DUF262 domain-containing protein	0	-2.07	0	0	0	0	2.2e-12	-2.07	0	0.94
675	Cgl1284	serA	dihydrofolate reductase	0	-2.23	-2.41	0	P:GO:0006564; F:GO:0004617; F:GO:0051287	P:L-serine biosynthetic process; F:phosphoglycerate dehydrogenase activity; F:NAD binding	0.64	-2.23	0	4.3e-11
676	Cgl1315	leuC	3-isopropylmalate dehydratase large subunit	0	-2.24	-2.34	0	P:GO:0009082; P:GO:0009098; F:GO:0003861; F:GO:0016853; F:GO:0046872; F:GO:0047456; F:GO:0051539	P:branched-chain amino acid biosynthetic process; P:leucine biosynthetic process; F:3-isopropylmalate dehydratase activity; F:isomerase activity; F:metal ion binding; F:2-methylisocitrate dehydratase activity; F:4 iron, 4 sulfur cluster binding	0	-2.24	0	3.5e-14
677	Cgl1340	-	MULTISPECIES: DUF2283 domain-containing protein	0	-2.13	-2.18	0	0	0	0.0088	-2.13	0	1.8e-05
678	Cgl1359	rpsA	30S ribosomal protein S1	0	-4.72	-2.63	0	F:GO:0003676; C:GO:0005840	F:nucleic acid binding; C:ribosome	0	-4.72	0	0.17
679	Cgl1378	infC	translation initiation factor IF-3	0	-5.14	-4.01	0	P:GO:0006413; F:GO:0003743; C:GO:0005737	P:translational initiation; F:translation initiation factor activity; C:cytoplasm	0	-5.14	0	0
680	Cgl1379	rpmI	50S ribosomal protein L35	-2.09	-5.53	-4.03	0	P:GO:0006412; F:GO:0003735; C:GO:0005840	P:translation; F:structural constituent of ribosome; C:ribosome	0	-5.53	0	0
681	Cgl1380	rplT	50S ribosomal protein L20	0	-5.24	-4.37	0	P:GO:0000027; P:GO:0006412; F:GO:0003735; F:GO:0019843; C:GO:0005840	P:ribosomal large subunit assembly; P:translation; F:structural constituent of ribosome; F:rRNA binding; C:ribosome	0	-5.24	0	0
682	Cgl1390	pheT	phenylalanine--tRNA ligase subunit beta	0	-2.01	0	0	P:GO:0006432; F:GO:0000049; F:GO:0000287; F:GO:0004826; F:GO:0005524; C:GO:0005737	P:phenylalanyl-tRNA aminoacylation; F:tRNA binding; F:magnesium ion binding; F:phenylalanine-tRNA ligase activity; F:ATP binding; C:cytoplasm	0.0039	-2.01	0	4.8e-07
683	Cgl1406	tyrS	tyrosine--tRNA ligase	0	-2.2	0	0	P:GO:0006437; F:GO:0003723; F:GO:0004831; F:GO:0005524; C:GO:0005737	P:tyrosyl-tRNA aminoacylation; F:RNA binding; F:tyrosine-tRNA ligase activity; F:ATP binding; C:cytoplasm	0.038	-2.2	0	0.75
684	Cgl1415	-	thiamine pyrophosphokinase	0	-2.03	-2.06	0	P:GO:0009229; P:GO:0016310; F:GO:0004788; F:GO:0005524; F:GO:0016301; C:GO:0016021	P:thiamine diphosphate biosynthetic process; P:phosphorylation; F:thiamine diphosphokinase activity; F:ATP binding; F:kinase activity; C:integral component of membrane	1.6e-07	-2.03	0	5.1e-13
685	Cgl1442	-	MerR family transcriptional regulator	-2.09	-2.19	0	0	P:GO:0006355; F:GO:0003677	P:regulation of transcription, DNA-templated; F:DNA binding	0	-2.19	0	0.002
686	Cgl1443	-	bifunctional nuclease family protein	0	-2.6	0	0	P:GO:0090305; F:GO:0004518	P:nucleic acid phosphodiester bond hydrolysis; F:nuclease activity	0	-2.6	0	0.0018
687	Cgl1452	gnd	6-PHOSPHOGLUCONATE DEHYDROGENASE	0	-2.58	-2.75	0	P:GO:0006098; P:GO:0019521; F:GO:0004616; F:GO:0050661	P:pentose-phosphate shunt; P:D-gluconate metabolic process; F:phosphogluconate dehydrogenase (decarboxylating) activity; F:NADP binding	2.6e-07	-2.58	0	0
688	Cgl1475	-	putative membrane protein	0	-2.58	0	0	C:GO:0016021	C:integral component of membrane	0.0012	-2.58	2.4e-15	0.098
689	Cgl1477	-	RNA polymerase-binding protein RbpA	0	-2.04	-3.62	0	P:GO:0045893; F:GO:0001000	P:positive regulation of transcription, DNA-templated; F:bacterial-type RNA polymerase core enzyme binding	0	-2.04	0	5.5e-08
690	Cgl1504	hisG	ATP phosphoribosyltransferase	0	-2.03	-2.01	0	P:GO:0000105; F:GO:0000287; F:GO:0003879; F:GO:0005524; C:GO:0005737	P:histidine biosynthetic process; F:magnesium ion binding; F:ATP phosphoribosyltransferase activity; F:ATP binding; C:cytoplasm	0.0057	-2.03	0	0
691	Cgl1533	-	SPFH/Band 7/PHB domain protein	0	-2.48	-2.47	0	P:GO:0006508; F:GO:0008233; C:GO:0016020	P:proteolysis; F:peptidase activity; C:membrane	5.5e-09	-2.48	0	0
692	Cgl1540	acn	aconitate hydratase	0	-4.13	-3.69	0	P:GO:0006099; P:GO:0019679; F:GO:0003730; F:GO:0003994; F:GO:0046872; F:GO:0047456; F:GO:0047780; F:GO:0051539	P:tricarboxylic acid cycle; P:propionate metabolic process, methylcitrate cycle; F:mRNA 3'-UTR binding; F:aconitate hydratase activity; F:metal ion binding; F:2-methylisocitrate dehydratase activity; F:citrate dehydratase activity; F:4 iron, 4 sulfur cluster binding	0	-4.13	0	0
693	Cgl1561	nifS2	cysteine desulfurase	0	-2.26	0	0	P:GO:0006534; F:GO:0016829; F:GO:0030170; F:GO:0031071	P:cysteine metabolic process; F:lyase activity; F:pyridoxal phosphate binding; F:cysteine desulfurase activity	2.7e-16	-2.26	0	0.14
694	Cgl1562	sufC	ABC transporter ATP-binding protein	0	-2.45	-2.34	0	F:GO:0005524	F:ATP binding	3.2e-15	-2.45	0	0.24
695	Cgl1563	sufD	Fe-S cluster assembly protein SufD	0	-2.57	-2.64	0	P:GO:0016226	P:iron-sulfur cluster assembly	0	-2.57	0	0.0032
696	Cgl1564	sufB	Fe-S cluster assembly protein SufD	0	-2.41	-2.7	0	P:GO:0016226	P:iron-sulfur cluster assembly	0.012	-2.41	0	8.8e-06
697	Cgl1565	-	transcriptional regulator	0	-2.02	-2.02	0	P:GO:0006355; F:GO:0003700	P:regulation of transcription, DNA-templated; F:DNA-binding transcription factor activity	0.0065	-2.02	0	0.0044
698	Cgl1574	tkt	transketolase	-2.35	-2.82	-3.5	0	F:GO:0004802; F:GO:0046872	F:transketolase activity; F:metal ion binding	0	-2.82	0	0
699	Cgl1576	zwf	glucose-6-phosphate dehydrogenase	0	-2.34	-2.15	0	P:GO:0006006; P:GO:0006098; F:GO:0004345; F:GO:0050661	P:glucose metabolic process; P:pentose-phosphate shunt; F:glucose-6-phosphate dehydrogenase activity; F:NADP binding	1.9e-19	-2.34	0	0
700	Cgl1584	secG	preprotein translocase subunit SecG	0	-2.95	-3.09	0	P:GO:0009306; P:GO:0071806; F:GO:0015450; C:GO:0005886; C:GO:0016021	P:protein secretion; P:protein transmembrane transport; F:P-P-bond-hydrolysis-driven protein transmembrane transporter activity; C:plasma membrane; C:integral component of membrane	0	-2.95	0	7.7e-07
701	Cgl1586	tpi	triosephosphate isomerase	0	-2.73	-3.92	0	P:GO:0006094; P:GO:0006096; F:GO:0004807; C:GO:0005737	P:gluconeogenesis; P:glycolytic process; F:triose-phosphate isomerase activity; C:cytoplasm	5.8e-08	-2.73	0	0
702	Cgl1605	-	DNA-directed RNA polymerase subunit omega	-3.01	-3.23	-2.94	0	P:GO:0006351; F:GO:0003677; F:GO:0003899	P:transcription, DNA-templated; F:DNA binding; F:DNA-directed 5'-3' RNA polymerase activity	0	-3.23	0	0
703	Cgl1613	pyrR	bifunctional pyrimidine regulatory protein PyrR uracil phosphoribosyltransferase	0	0	-2.05	0	P:GO:0006355; P:GO:0009116; F:GO:0004845	P:regulation of transcription, DNA-templated; P:nucleoside metabolic process; F:uracil phosphoribosyltransferase activity	0.11	-1.42	0	0.0067
704	Cgl1635	aspS	aspartate--tRNA ligase	0	-2.41	-2.31	0	P:GO:0006422; F:GO:0003676; F:GO:0004815; F:GO:0005524; F:GO:0050560; C:GO:0005737	P:aspartyl-tRNA aminoacylation; F:nucleic acid binding; F:aspartate-tRNA ligase activity; F:ATP binding; F:aspartate-tRNA(Asn) ligase activity; C:cytoplasm	4.4e-08	-2.41	0	3.6e-11
705	Cgl1639	-	ATP-binding cassette domain-containing protein	0	2.05	0	0	0	0	0.00016	2.05	0	1
706	Cgl1652	-	putative membrane protein	0	-2.71	-3.39	0	F:GO:0047134; C:GO:0016021	F:protein-disulfide reductase activity; C:integral component of membrane	2.7e-09	-2.71	0	0
707	Cgl1673	-	copper chaperone PCu(A)C	0	0	-2.18	0	0	0	1.2e-15	-1.27	0	1e-58
708	Cgl1912	-	DUF418 domain-containing protein	0	-2.02	0	0	C:GO:0016021	C:integral component of membrane	0.011	-2.02	5.9e-07	2.3e-06
709	Cgl1955	recA	recombinase A	0	-2.44	-2.3	0	P:GO:0006281; P:GO:0006310; P:GO:0009432; F:GO:0003684; F:GO:0003697; F:GO:0005524; F:GO:0008094; C:GO:0005737	P:DNA repair; P:DNA recombination; P:SOS response; F:damaged DNA binding; F:single-stranded DNA binding; F:ATP binding; F:DNA-dependent ATPase activity; C:cytoplasm	0.0033	-2.44	0	0.053
710	Cgl1961	-	PspA/IM30 family protein	0	-2.63	-2.46	0	0	0	1.3e-17	-2.63	0	6e-07
711	Cgl1962	-	transcriptional regulator	0	0	-2.15	0	F:GO:0003677	F:DNA binding	4.5e-05	-1.06	0	1.4e-11
712	Cgl1967	terC	tellurium resistance protein TerC	0	-2.1	0	0	C:GO:0016021	C:integral component of membrane	0.54	-2.1	9.5e-14	0.00053
713	Cgl1970	-	ribonuclease J	0	-2.94	-2.79	0	P:GO:0006364; P:GO:0090502; P:GO:0090503; F:GO:0003723; F:GO:0004521; F:GO:0004534; F:GO:0008270; C:GO:0005737	P:rRNA processing; P:RNA phosphodiester bond hydrolysis, endonucleolytic; P:RNA phosphodiester bond hydrolysis, exonucleolytic; F:RNA binding; F:endoribonuclease activity; F:5'-3' exoribonuclease activity; F:zinc ion binding; C:cytoplasm	7e-09	-2.94	0	0
714	Cgl1975	-	polyribonucleotide nucleotidyltransferase	0	-2.33	-2.46	0	P:GO:0006396; P:GO:0006402; F:GO:0000287; F:GO:0003723; F:GO:0004654; C:GO:0005737	P:RNA processing; P:mRNA catabolic process; F:magnesium ion binding; F:RNA binding; F:polyribonucleotide nucleotidyltransferase activity; C:cytoplasm	0.004	-2.33	0	0
715	Cgl2001	mqo	malate:quinone oxidoreductase	0	-3.11	-2.66	0	P:GO:0006099; F:GO:0008924; F:GO:0052589; C:GO:0005886	P:tricarboxylic acid cycle; F:malate dehydrogenase (quinone) activity; F:malate dehydrogenase (menaquinone) activity; C:plasma membrane	0.0068	-3.11	0	4.4e-07
716	Cgl2002	-	alpha/beta hydrolase	0	-2.15	-2.05	0	F:GO:0004622; F:GO:0102545	F:lysophospholipase activity; F:phosphatidyl phospholipase B activity	0.0006	-2.15	1.6e-12	0.04
717	Cgl2007	map2	methionine aminopeptidase	0	-2.96	-2.76	0	P:GO:0006508; P:GO:0070084; F:GO:0046872; F:GO:0070006	P:proteolysis; P:protein initiator methionine removal; F:metal ion binding; F:metalloaminopeptidase activity	2e-09	-2.96	0	0
718	Cgl2022	cdsA	phosphatidate cytidylyltransferase	0	-2.46	0	0	P:GO:0016024; F:GO:0004605; C:GO:0016021	P:CDP-diacylglycerol biosynthetic process; F:phosphatidate cytidylyltransferase activity; C:integral component of membrane	2.2e-10	-2.46	1.4e-10	0.22
719	Cgl2025	tsf	elongation factor Ts	0	-4.37	-4.55	0	P:GO:0006414; F:GO:0003746; C:GO:0005737	P:translational elongation; F:translation elongation factor activity; C:cytoplasm	0	-4.37	0	0
720	Cgl2032	-	MULTISPECIES: DUF2469 domain-containing protein	0	-2.81	-2.52	0	0	0	0.00024	-2.81	0	2.5e-11
721	Cgl2058	srp	signal recognition particle protein	0	-2.11	-2.21	0	P:GO:0006614; F:GO:0003924; F:GO:0005525; F:GO:0008312; C:GO:0048500	P:SRP-dependent cotranslational protein targeting to membrane; F:GTPase activity; F:GTP binding; F:7S RNA binding; C:signal recognition particle	4.9e-11	-2.11	0	5.9e-14
722	Cgl2114	-	ABC transporter substrate-binding protein	0	-3.05	-2.75	0	0	0	1e-13	-3.05	0	2.3e-07
723	Cgl2115	-	transcriptional regulator	0	-3.3	-2.89	0	0	0	0	-3.3	0	2.7e-11
724	Cgl2129	-	methionine synthase II (cobalamin-independent)	0	-2.08	-2.62	0	P:GO:0009086; P:GO:0032259; F:GO:0003871; F:GO:0008270	P:methionine biosynthetic process; P:methylation; F:5-methyltetrahydropteroyltriglutamate-homocysteine S-methyltransferase activity; F:zinc ion binding	3.1e-06	-2.08	0	1.1e-16
725	Cgl2133	-	cation transporter	0	-2.21	0	0	P:GO:0098655; F:GO:0008324; C:GO:0016021	P:cation transmembrane transport; F:cation transmembrane transporter activity; C:integral component of membrane	0.025	-2.21	3.1e-05	0.44
726	Cgl2134	-	diacetyl reductase	0	-3.33	-3.4	0	F:GO:0016616	F:oxidoreductase activity, acting on the CH-OH group of donors, NAD or NADP as acceptor	0	-3.33	0	0.024
727	Cgl2142	-	hypothetical protein	0	-2.63	-2.61	0	0	0	0	-2.63	0	0
728	Cgl2148	ileS	isoleucine--tRNA ligase	0	-2.23	0	0	P:GO:0006428; P:GO:0106074; F:GO:0000049; F:GO:0002161; F:GO:0004822; F:GO:0005524; F:GO:0008270; C:GO:0005737	P:isoleucyl-tRNA aminoacylation; P:aminoacyl-tRNA metabolism involved in translational fidelity; F:tRNA binding; F:aminoacyl-tRNA editing activity; F:isoleucine-tRNA ligase activity; F:ATP binding; F:zinc ion binding; C:cytoplasm	6e-06	-2.23	1.4e-15	3.1e-28
729	Cgl2165	-	putative secreted protein	0	-2.09	-2.18	0	P:GO:0051301; C:GO:0016021	P:cell division; C:integral component of membrane	5.8e-12	-2.09	0	0
730	Cgl2167	mraZ	cell division protein MraZ	0	-2.63	-2.66	0	P:GO:0006355; P:GO:0051301; F:GO:0003677; F:GO:0003700; C:GO:0005737; C:GO:0009295	P:regulation of transcription, DNA-templated; P:cell division; F:DNA binding; F:DNA-binding transcription factor activity; C:cytoplasm; C:nucleoid	0	-2.63	0	3.3e-08
731	Cgl2178	aroG	phospho-2-dehydro-3-deoxyheptonate aldolase	0	-3.24	-3.3	0	P:GO:0008652; P:GO:0009073; P:GO:0009423; F:GO:0003849	P:cellular amino acid biosynthetic process; P:aromatic amino acid family biosynthetic process; P:chorismate biosynthetic process; F:3-deoxy-7-phosphoheptulonate synthase activity	0	-3.24	0	0
732	Cgl2197	-	MULTISPECIES: iron-sulfur cluster assembly accessory protein	0	0	-2.89	0	P:GO:0097428; F:GO:0005198; F:GO:0051536	P:protein maturation by iron-sulfur cluster transfer; F:structural molecule activity; F:iron-sulfur cluster binding	0	-1.97	0	0
733	Cgl2249	-	ABC transporter ATP-binding protein	-2.24	0	0	0	F:GO:0005524	F:ATP binding	0	-1.79	1.5e-11	6.7e-13
734	Cgl2256	nagD	HAD family hydrolase	0	-2.43	-2.81	0	P:GO:0016052; P:GO:0016311; F:GO:0016791; F:GO:0046872	P:carbohydrate catabolic process; P:dephosphorylation; F:phosphatase activity; F:metal ion binding	0	-2.43	0	1e-14
735	Cgl2278	glyS	glycine--tRNA ligase	0	-4.4	-4.04	0	P:GO:0006426; F:GO:0004820; F:GO:0005524; F:GO:0046983; C:GO:0005737	P:glycyl-tRNA aminoacylation; F:glycine-tRNA ligase activity; F:ATP binding; F:protein dimerization activity; C:cytoplasm	0	-4.4	0	0
736	Cgl2297	malQ	4-alpha-glucanotransferase	0	-2.91	-2.89	0	P:GO:0005977; F:GO:0004134; F:GO:0102500	P:glycogen metabolic process; F:4-alpha-glucanotransferase activity; F:beta-maltose 4-alpha-glucanotransferase activity	2.5e-06	-2.91	0	5.3e-14
737	Cgl2309	aecD	pyridoxal phosphate-dependent aminotransferase	0	-3.19	-2.91	0	P:GO:0009086; F:GO:0004121; F:GO:0008483; F:GO:0030170; F:GO:0047804	P:methionine biosynthetic process; F:cystathionine beta-lyase activity; F:transaminase activity; F:pyridoxal phosphate binding; F:cysteine-S-conjugate beta-lyase activity	1.5e-08	-3.19	0	0
738	Cgl2312	ectP	multidrug DMT transporter permease	0	-2.89	-2.47	0	P:GO:0006814; P:GO:0006865; P:GO:0055085; F:GO:0005488; F:GO:0015293; C:GO:0005886; C:GO:0016021	P:sodium ion transport; P:amino acid transport; P:transmembrane transport; F:binding; F:symporter activity; C:plasma membrane; C:integral component of membrane	2.4e-07	-2.89	0	3.2e-15
739	Cgl2332	thiX	thiamine biosynthesis protein ThiX	0	-2.35	-2.43	0	P:GO:0009228; C:GO:0005886	P:thiamine biosynthetic process; C:plasma membrane	0.011	-2.35	0	6.8e-08
740	Cgl2343	rpsT	30S ribosomal protein S20	0	-5.06	-4.81	0	P:GO:0006412; F:GO:0003735; F:GO:0019843; C:GO:0005840	P:translation; F:structural constituent of ribosome; F:rRNA binding; C:ribosome	0	-5.06	0	0
741	Cgl2354	proA	gamma-glutamyl phosphate reductase	-2.04	-2.49	-2.43	0	P:GO:0055129; F:GO:0004350; F:GO:0050661; C:GO:0005737	P:L-proline biosynthetic process; F:glutamate-5-semialdehyde dehydrogenase activity; F:NADP binding; C:cytoplasm	0	-2.49	0	0
742	Cgl2359	dkgA	2,5-diketo-D-gluconic acid reductase	0	-2.71	-2.42	0	F:GO:0050580	F:2,5-didehydrogluconate reductase activity	0.68	-2.71	0	1.5e-06
743	Cgl2445	-	TetR family transcriptional regulator	0	-2.25	0	0	F:GO:0003677	F:DNA binding	1.1e-09	-2.25	0	0.42
744	Cgl2446	metB	cystathionine gamma-synthase	0	-2.23	0	0	P:GO:0009086; P:GO:0019346; F:GO:0003962; F:GO:0016829; F:GO:0030170; F:GO:0102028	P:methionine biosynthetic process; P:transsulfuration; F:cystathionine gamma-synthase activity; F:lyase activity; F:pyridoxal phosphate binding; F:cystathionine gamma-synthase activity (acts on O-phosphohomoserine)	3.2e-14	-2.23	0	0.44
745	Cgl2454	-	ABC transporter ATP-binding protein	0	-2.66	-3.09	0	P:GO:0045900; F:GO:0000049; F:GO:0005524; F:GO:0016887; F:GO:0019843; F:GO:0043022; C:GO:0005737	P:negative regulation of translational elongation; F:tRNA binding; F:ATP binding; F:ATPase activity; F:rRNA binding; F:ribosome binding; C:cytoplasm	2.4e-16	-2.66	0	0
746	Cgl2527	-	FadR family transcriptional regulator	0	-2.14	0	0	P:GO:0006355; F:GO:0003677; F:GO:0003700	P:regulation of transcription, DNA-templated; F:DNA binding; F:DNA-binding transcription factor activity	1e-14	-2.14	0	0.0012
747	Cgl2532	nrdH	glutaredoxin NrdH	0	-2.38	-2.26	0	P:GO:0022900; P:GO:0045454; F:GO:0009055; F:GO:0015035	P:electron transport chain; P:cell redox homeostasis; F:electron transfer activity; F:protein disulfide oxidoreductase activity	2.1e-10	-2.38	0	0
748	Cgl2564	-	Predicted acetyltransferase	0	0	-2.57	0	F:GO:0016740	F:transferase activity	0.0031	-0.72	0	0.0017
749	Cgl2582	-	DUF3073 domain-containing protein	0	0	-3.32	0	0	0	0	-0.81	0	0
750	Cgl2617	ddh	diaminopimelate dehydrogenase	0	-2.61	-2.75	0	P:GO:0009089; P:GO:0019877; F:GO:0000166; F:GO:0047850	P:lysine biosynthetic process via diaminopimelate; P:diaminopimelate biosynthetic process; F:nucleotide binding; F:diaminopimelate dehydrogenase activity	1.2e-09	-2.61	0	0.00027
751	Cgl2667	-	putative secreted protein	0	-2.23	-2.21	0	C:GO:0016021	C:integral component of membrane	1.1e-09	-2.23	0	0.53
752	Cgl2670	cynT	carbonic anhydrase	0	-2.13	-2.3	0	F:GO:0004089; F:GO:0008270	F:carbonate dehydratase activity; F:zinc ion binding	2e-08	-2.13	0	4.6e-13
753	Cgl2674	butA	diacetyl reductase	0	0	-2.15	0	P:GO:0034077; P:GO:0045150; P:GO:0051289; F:GO:0047512; F:GO:0052588; F:GO:0070403; F:GO:0070404	P:butanediol metabolic process; P:acetoin catabolic process; P:protein homotetramerization; F:(S,S)-butanediol dehydrogenase activity; F:diacetyl reductase ((S)-acetoin forming) activity; F:NAD+ binding; F:NADH binding	0.87	-0.47	0	0.15
754	Cgl2678	clpC	NDP-hexose 4-ketoreductase	0	-2.18	-3.12	0	P:GO:0006508; F:GO:0005524; F:GO:0008233; F:GO:0016887	P:proteolysis; F:ATP binding; F:peptidase activity; F:ATPase activity	1.4e-05	-2.18	0	0.00026
755	Cgl2681	phe	phenol 2-monooxygenase	0	2.04	0	0	F:GO:0018658; F:GO:0018662; F:GO:0071949	F:salicylate 1-monooxygenase activity; F:phenol 2-monooxygenase activity; F:FAD binding	0.0027	2.04	0	0.029
756	Cgl2700	ppa	inorganic pyrophosphatase	0	-3.62	-3.89	0	P:GO:0006796; F:GO:0000287; F:GO:0004427; C:GO:0005737	P:phosphate-containing compound metabolic process; F:magnesium ion binding; F:inorganic diphosphatase activity; C:cytoplasm	0	-3.62	0	0
757	Cgl2714	pvdS2	polyphosphate kinase 2	0	-2.84	-2.44	0	P:GO:0016310; F:GO:0008976	P:phosphorylation; F:polyphosphate kinase activity	0.00081	-2.84	0	5.2e-15
758	Cgl2716	groEL	chaperonin GroEL	-2.84	-4.9	-5.1	0	P:GO:0042026; F:GO:0005524; F:GO:0051082; C:GO:0005737	P:protein refolding; F:ATP binding; F:unfolded protein binding; C:cytoplasm	0	-4.9	0	0
759	Cgl2719	-	MULTISPECIES: hypothetical protein	0	-2.36	0	0	0	0	0.002	-2.36	9e-09	1.3e-07
760	Cgl2755	-	GNAT family N-acetyltransferase	0	-2.77	0	0	P:GO:0006048; F:GO:0004343	P:UDP-N-acetylglucosamine biosynthetic process; F:glucosamine 6-phosphate N-acetyltransferase activity	6.9e-13	-2.77	0	0.093
761	Cgl2766	purA	adenylosuccinate synthetase	0	-2.11	-2.13	0	P:GO:0044208; F:GO:0000287; F:GO:0004019; F:GO:0005525; C:GO:0005737	P:'de novo' AMP biosynthetic process; F:magnesium ion binding; F:adenylosuccinate synthase activity; F:GTP binding; C:cytoplasm	0.21	-2.11	0	3.4e-12
762	Cgl2799	grpE	nucleotide exchange factor GrpE	0	0	-2.95	0	P:GO:0006457; P:GO:0050790; F:GO:0000774; F:GO:0042803; F:GO:0051087; C:GO:0005737	P:protein folding; P:regulation of catalytic activity; F:adenyl-nucleotide exchange factor activity; F:protein homodimerization activity; F:chaperone binding; C:cytoplasm	0	-1.56	0	1.2e-80
763	Cgl2800	dnaK	molecular chaperone DnaK	0	0	-2.76	0	P:GO:0006457; F:GO:0005524; F:GO:0051082	P:protein folding; F:ATP binding; F:unfolded protein binding	0	-1.01	0	0.48
764	Cgl2813	-	sirohydrochlorin chelatase	0	-2.17	-2.15	0	F:GO:0016852; F:GO:0046872	F:sirohydrochlorin cobaltochelatase activity; F:metal ion binding	5.7e-07	-2.17	0	0.75
765	Cgl2814	cysN	sulfate adenylyltransferase	0	-4.09	-4.23	0	P:GO:0006790; F:GO:0003924; F:GO:0004781; F:GO:0005524; F:GO:0005525	P:sulfur compound metabolic process; F:GTPase activity; F:sulfate adenylyltransferase (ATP) activity; F:ATP binding; F:GTP binding	0.11	-4.09	0	0
766	Cgl2815	cysD	sulfate adenylyltransferase subunit 2	0	-2.71	-2.82	0	P:GO:0019419; F:GO:0004781	P:sulfate reduction; F:sulfate adenylyltransferase (ATP) activity	1.3e-07	-2.71	0	1.5e-13
767	Cgl2816	cysH	phosphoadenosine phosphosulfate reductase	0	-2.37	-2.42	0	P:GO:0019344; P:GO:0019379; P:GO:0070814; F:GO:0004604; F:GO:0016740; F:GO:0043866; C:GO:0005737	P:cysteine biosynthetic process; P:sulfate assimilation, phosphoadenylyl sulfate reduction by phosphoadenylyl-sulfate reductase (thioredoxin); P:hydrogen sulfide biosynthetic process; F:phosphoadenylyl-sulfate reductase (thioredoxin) activity; F:transferase activity; F:adenylyl-sulfate reductase (thioredoxin) activity; C:cytoplasm	8.3e-14	-2.37	0	0
768	Cgl2841	bglG	PRD domain-containing protein	-3.39	-2.92	-2.68	0	P:GO:0006355; F:GO:0003723	P:regulation of transcription, DNA-templated; F:RNA binding	0	-2.92	0	5.6e-08
769	Cgl2863	pck	phosphoenolpyruvate carboxykinase	0	-2.76	-3.53	0	P:GO:0006094; P:GO:0016310; F:GO:0004613; F:GO:0005525; F:GO:0016301; F:GO:0030145; C:GO:0005737	P:gluconeogenesis; P:phosphorylation; F:phosphoenolpyruvate carboxykinase (GTP) activity; F:GTP binding; F:kinase activity; F:manganese ion binding; C:cytoplasm	0.89	-2.76	0	0
770	Cgl2874	-	putative secreted protein	0	-2.95	-3.26	0	0	0	2.3e-16	-2.95	0	0
771	Cgl2875	cop1	protein PS1	0	-3	-3.27	0	F:GO:0016740; C:GO:0005576	F:transferase activity; C:extracellular region	1.3e-06	-3	0	0
772	Cgl2927	sod	Superoxide dismutase	0	0	-2.2	0	P:GO:0019430; F:GO:0004784; F:GO:0046872	P:removal of superoxide radicals; F:superoxide dismutase activity; F:metal ion binding	0.0027	-1.87	0	0.00035
773	Cgl2932	-	MULTISPECIES: hypothetical protein	0	-2.27	-2.37	0	0	0	2.1e-17	-2.27	0	0.00019
774	Cgl2949	-	PspA/IM30 family protein	0	0	-3.25	0	0	0	2.3e-12	-1.81	0	0
775	Cgl2976	trxB1	thioredoxin	0	-2.97	-3.25	0	P:GO:0006662; P:GO:0045454; F:GO:0015035; F:GO:0016853	P:glycerol ether metabolic process; P:cell redox homeostasis; F:protein disulfide oxidoreductase activity; F:isomerase activity	0	-2.97	0	4.6e-11
776	Cgl2982	ssb	single-stranded DNA-binding protein	-2.27	-3.96	-4.01	0	P:GO:0006260; F:GO:0003697	P:DNA replication; F:single-stranded DNA binding	0	-3.96	0	0
777	Cgl2983	rpsF	30S ribosomal protein S6	0	-4.42	-4.9	0	P:GO:0006412; F:GO:0003735; F:GO:0019843; C:GO:0005840	P:translation; F:structural constituent of ribosome; F:rRNA binding; C:ribosome	0	-4.42	0	0
778	Cgl2991	-	antibiotic biosynthesis monooxygenase	0	-2.55	-2.82	0	F:GO:0004497	F:monooxygenase activity	0	-2.55	0	3.6e-05
779	Cgl2996	-	myo-inositol-1-phosphate synthase	0	-3.86	-3.77	0	P:GO:0006021; P:GO:0008654; F:GO:0004512	P:inositol biosynthetic process; P:phospholipid biosynthetic process; F:inositol-3-phosphate synthase activity	0	-3.86	0	0
780	Cgl3091	trxC	thioredoxin	0	-2.6	-2.27	0	P:GO:0006662; P:GO:0045454; F:GO:0015035; F:GO:0016853	P:glycerol ether metabolic process; P:cell redox homeostasis; F:protein disulfide oxidoreductase activity; F:isomerase activity	0	-2.6	0	0.018
781	Cgl0267	mnhD	cation:proton antiporter	0	0	0	-2.01	P:GO:0042773; F:GO:0008137; C:GO:0016021	P:ATP synthesis coupled electron transport; F:NADH dehydrogenase (ubiquinone) activity; C:integral component of membrane	0.00047	-1.18	1.9e-05	8.3e-11
782	Cgl0521	rplN	50S ribosomal protein L14	-2.43	-5.86	-4.31	-2.01	P:GO:0006412; F:GO:0003735; F:GO:0019843; C:GO:0015934	P:translation; F:structural constituent of ribosome; F:rRNA binding; C:large ribosomal subunit	0	-5.86	0	0
783	Cgl0709	birA	biotin--[acetyl-CoA-carboxylase] ligase	0	0	0	-2.01	P:GO:0006464; F:GO:0004077	P:cellular protein modification process; F:biotin-[acetyl-CoA-carboxylase] ligase activity	4.1e-10	-1.61	3.2e-10	3.1e-15
784	Cgl0040	-	septation inhibitor protein	0	0	-2.14	-2.02	P:GO:0007049; P:GO:0051301; C:GO:0005887	P:cell cycle; P:cell division; C:integral component of plasma membrane	9e-19	-1.94	0	0
785	Cgl1010	fum	aspartate ammonia-lyase	0	-3.71	-4.13	-2.02	P:GO:0006099; P:GO:0006106; F:GO:0004333; C:GO:0045239	P:tricarboxylic acid cycle; P:fumarate metabolic process; F:fumarate hydratase activity; C:tricarboxylic acid cycle enzyme complex	0	-3.71	0	0
786	Cgl1426	-	RluA family pseudouridine synthase	0	-2.02	-2.22	-2.02	P:GO:0001522; F:GO:0003723; F:GO:0009982; F:GO:0016829	P:pseudouridine synthesis; F:RNA binding; F:pseudouridine synthase activity; F:lyase activity	0.4	-2.02	0	0
787	Cgl1472	-	DNA alkylation repair protein	0	0	0	-2.02	0	0	0.81	-0.42	0.33	1.8e-06
788	Cgl2150	-	cell division protein	0	-2.67	-4.14	-2.03	P:GO:0007049; P:GO:0051301; C:GO:0005737	P:cell cycle; P:cell division; C:cytoplasm	0	-2.67	0	0
789	Cgl0473	-	geranylgeranyl pyrophosphate synthase	0	0	0	-2.04	P:GO:0008299; F:GO:0004161; F:GO:0004311; F:GO:0004337	P:isoprenoid biosynthetic process; F:dimethylallyltranstransferase activity; F:farnesyltranstransferase activity; F:geranyltranstransferase activity	0.17	-0.4	0.079	7.1e-10
790	Cgl2995	-	hemolysin D	0	0	0	-2.04	C:GO:0016021	C:integral component of membrane	8.1e-11	-1.44	4e-08	3.7e-14
791	Cgl3047	-	MULTISPECIES: hypothetical protein	-3.16	-3.02	-2.89	-2.04	0	0	0	-3.02	0	0
792	Cgl1179	argS	arginine--tRNA ligase	0	0	0	-2.05	P:GO:0006420; F:GO:0004814; F:GO:0005524; C:GO:0005737	P:arginyl-tRNA aminoacylation; F:arginine-tRNA ligase activity; F:ATP binding; C:cytoplasm	0.0077	-1.08	2.5e-06	7.2e-13
793	Cgl1407	uspA2	stress protein	-3.46	-2.97	-3.02	-2.05	0	0	0	-2.97	0	0
794	Cgl2079	gdh	glutamate dehydrogenase	0	-2.94	-3.72	-2.05	P:GO:0006537; F:GO:0000166; F:GO:0004354; C:GO:0005737	P:glutamate biosynthetic process; F:nucleotide binding; F:glutamate dehydrogenase (NADP+) activity; C:cytoplasm	0	-2.94	0	0
795	Cgl2890	glpK	glycerol kinase	0	0	0	-2.05	P:GO:0006072; P:GO:0016310; P:GO:0019563; F:GO:0004370; F:GO:0005524; C:GO:0016021	P:glycerol-3-phosphate metabolic process; P:phosphorylation; P:glycerol catabolic process; F:glycerol kinase activity; F:ATP binding; C:integral component of membrane	0.0055	-0.54	0.028	5.2e-09
796	Cgl2745	-	phenazine biosynthesis protein PhzF	0	0	0	-2.06	P:GO:0009058; F:GO:0003824	P:biosynthetic process; F:catalytic activity	0.0081	-0.74	0.042	4.4e-08
797	Cgl0815	-	DUF3239 domain-containing protein	0	-2.1	0	-2.07	C:GO:0016021	C:integral component of membrane	0.002	-2.1	0	0
798	Cgl2544	-	putative hydro-lyase	0	0	0	-2.07	F:GO:0016829	F:lyase activity	7.2e-12	-1.74	2.4e-11	0
799	Cgl2918	lldD	quinone-dependent L-lactate dehydrogenase	0	0	0	-2.07	F:GO:0004460; F:GO:0010181	F:L-lactate dehydrogenase (cytochrome) activity; F:FMN binding	0.057	-1.18	3.5e-09	0
800	Cgl2220	thrC	threonine synthase	0	-2.33	-2.2	-2.08	P:GO:0009088; F:GO:0004795; F:GO:0030170	P:threonine biosynthetic process; F:threonine synthase activity; F:pyridoxal phosphate binding	4.5e-06	-2.33	0	0
801	Cgl0589	-	tRNA (adenosine(37)-N6)-threonylcarbamoyltransferase complex ATPase subunit type 1 TsaE	0	0	0	-2.09	P:GO:0002949; C:GO:0005737	P:tRNA threonylcarbamoyladenosine modification; C:cytoplasm	0.99	0.34	0.014	0.00023
802	Cgl0323	rmlB2	UDP-glucose 4-epimerase	0	0	0	-2.1	F:GO:0003978	F:UDP-glucose 4-epimerase activity	8.4e-08	-1.82	1.2e-15	0
803	Cgl0654	cstA	carbon starvation protein A	0	0	0	-2.11	P:GO:0009267; C:GO:0005886; C:GO:0016021	P:cellular response to starvation; C:plasma membrane; C:integral component of membrane	0.53	-0.28	0.42	1.5e-06
804	Cgl1963	-	competence protein	0	0	0	-2.11	0	0	0.32	-1.08	0.076	3.3e-09
805	Cgl2490	-	TetR family transcriptional regulator	0	0	0	-2.11	F:GO:0003677	F:DNA binding	1.3e-10	-1.24	2.4e-05	3.5e-12
806	Cgl0025	-	transcriptional regulator	0	0	0	-2.12	P:GO:0006355; F:GO:0003677; F:GO:0016787	P:regulation of transcription, DNA-templated; F:DNA binding; F:hydrolase activity	0.15	-1.92	0.00023	1.7e-08
807	Cgl0573	cma	cyclopropane-fatty-acyl-phospholipid synthase	0	-2.43	-2.03	-2.12	P:GO:0008610; P:GO:0032259; F:GO:0008825	P:lipid biosynthetic process; P:methylation; F:cyclopropane-fatty-acyl-phospholipid synthase activity	4.9e-05	-2.43	2e-16	0
808	Cgl0726	-	SRPBCC domain-containing protein	0	0	0	-2.12	0	0	1.3e-07	-0.65	0.0053	2.1e-12
809	Cgl1000	-	hypothetical protein	0	-2.39	-2.28	-2.12	0	0	2.3e-05	-2.39	0	0
810	Cgl2000	-	VOC family protein	0	-3.19	-2.73	-2.12	P:GO:0032259; F:GO:0008168	P:methylation; F:methyltransferase activity	0	-3.19	0	0
811	Cgl2300	-	putative secreted or membrane protein	-2.09	0	0	-2.12	C:GO:0016021	C:integral component of membrane	0	-1.81	2.8e-15	0
812	Cgl2533	-	50S ribosomal protein L36	0	-2.84	-3.73	-2.12	P:GO:0006412; F:GO:0003735; C:GO:0005840	P:translation; F:structural constituent of ribosome; C:ribosome	3.4e-12	-2.84	0	0
813	Cgl2552	-	ABC transporter permease	0	-2.61	-2.66	-2.12	P:GO:0007049; P:GO:0051301; C:GO:0005886; C:GO:0016021	P:cell cycle; P:cell division; C:plasma membrane; C:integral component of membrane	0	-2.61	0	0
814	Cgl2558	murA2	UDP-N-acetylglucosamine 1-carboxyvinyltransferase	0	0	0	-2.12	P:GO:0007049; P:GO:0008360; P:GO:0009252; P:GO:0019277; P:GO:0051301; P:GO:0071555; F:GO:0008760; C:GO:0005737	P:cell cycle; P:regulation of cell shape; P:peptidoglycan biosynthetic process; P:UDP-N-acetylgalactosamine biosynthetic process; P:cell division; P:cell wall organization; F:UDP-N-acetylglucosamine 1-carboxyvinyltransferase activity; C:cytoplasm	0.053	-1.61	4.8e-08	1e-14
815	Cgl2308	-	putative secreted protein	0	0	0	-2.13	0	0	2.4e-05	-1.63	2.6e-07	1.3e-14
816	Cgl2376	valS	valine--tRNA ligase	0	0	0	-2.13	P:GO:0006438; P:GO:0106074; F:GO:0002161; F:GO:0004832; F:GO:0005524; C:GO:0005737	P:valyl-tRNA aminoacylation; P:aminoacyl-tRNA metabolism involved in translational fidelity; F:aminoacyl-tRNA editing activity; F:valine-tRNA ligase activity; F:ATP binding; C:cytoplasm	0.15	-1.74	1.5e-14	0
817	Cgl0660	-	antibiotic biosynthesis monooxygenase	0	0	0	-2.15	F:GO:0004497	F:monooxygenase activity	0.024	-0.23	0.73	4.6e-08
818	Cgl2128	-	putative secreted protein	0	-3.22	-3.1	-2.15	F:GO:0047134	F:protein-disulfide reductase activity	0	-3.22	0	0
819	Cgl2403	-	Hypothetical protein	0	0	0	-2.15	0	0	0.34	-1.06	0.34	1.5e-10
820	Cgl1003	-	Allophanate hydrolase subunit 1	0	0	0	-2.16	F:GO:0004039; F:GO:0005524	F:allophanate hydrolase activity; F:ATP binding	3.8e-07	-0.93	0.0077	2.9e-09
821	Cgl1621	aroB	3-dehydroquinate synthase	0	0	0	-2.16	P:GO:0008652; P:GO:0009073; P:GO:0009423; F:GO:0000166; F:GO:0003856; F:GO:0046872; C:GO:0005737	P:cellular amino acid biosynthetic process; P:aromatic amino acid family biosynthetic process; P:chorismate biosynthetic process; F:nucleotide binding; F:3-dehydroquinate synthase activity; F:metal ion binding; C:cytoplasm	0.62	-0.32	0.19	7.8e-08
822	Cgl0948	cgtS10	histidine kinase	-2.77	-4.26	-3.79	-2.17	P:GO:0000160; P:GO:0016310; F:GO:0000155; F:GO:0046983; C:GO:0016021	P:phosphorelay signal transduction system; P:phosphorylation; F:phosphorelay sensor kinase activity; F:protein dimerization activity; C:integral component of membrane	0	-4.26	0	0
823	Cgl0432	-	hypothetical membrane protein	0	-2.09	-2.04	-2.18	C:GO:0016021	C:integral component of membrane	1.7e-08	-2.09	0	0
824	Cgl0985	-	putative secreted protein	-2.54	-3.82	-3.23	-2.18	0	0	0	-3.82	0	0
825	Cgl2160	murD	UDP-N-acetylmuramoyl-L-alanyl-D-glutamate synthetase	0	0	0	-2.18	P:GO:0007049; P:GO:0008360; P:GO:0009252; P:GO:0051301; P:GO:0071555; F:GO:0005524; F:GO:0008764; C:GO:0005737	P:cell cycle; P:regulation of cell shape; P:peptidoglycan biosynthetic process; P:cell division; P:cell wall organization; F:ATP binding; F:UDP-N-acetylmuramoylalanine-D-glutamate ligase activity; C:cytoplasm	0.0021	-1.18	0.00035	1.8e-13
826	Cgl2619	-	HAD family hydrolase	0	-2.73	-3.25	-2.18	F:GO:0016787	F:hydrolase activity	0	-2.73	0	0
827	Cgl3037	rmpA	PTS sugar transporter	0	0	0	-2.18	P:GO:0009401; P:GO:0034219; F:GO:0008982	P:phosphoenolpyruvate-dependent sugar phosphotransferase system; P:carbohydrate transmembrane transport; F:protein-N(PI)-phosphohistidine-sugar phosphotransferase activity	0.38	-0.53	0.12	2.7e-08
828	Cgl0658	prpB2	methylisocitrate lyase	0	0	0	-2.19	P:GO:0019629; F:GO:0000287; F:GO:0046421	P:propionate catabolic process, 2-methylcitrate cycle; F:magnesium ion binding; F:methylisocitrate lyase activity	0.0031	-1.25	1.9e-05	4.1e-12
829	Cgl1094	-	arsenate reductase	-2.22	-2.21	-2.21	-2.19	F:GO:0008794	F:arsenate reductase (glutaredoxin) activity	0	-2.21	0	0
830	Cgl1303	-	ATP-binding protein	0	-2.3	0	-2.19	F:GO:0005524	F:ATP binding	0.00051	-2.3	6.3e-06	9.2e-08
831	Cgl1992	-	peptide ABC transporter permease	-2.11	0	0	-2.19	P:GO:0055085; C:GO:0005886; C:GO:0016021	P:transmembrane transport; C:plasma membrane; C:integral component of membrane	2e-18	-1.63	1.5e-08	4.5e-16
832	Cgl0559	-	L,D-transpeptidase	0	-3.22	-3.21	-2.21	P:GO:0009252; F:GO:0016740	P:peptidoglycan biosynthetic process; F:transferase activity	0	-3.22	0	0
833	Cgl0803	ftsX	cell division protein FtsX	0	-2.34	-2.26	-2.21	P:GO:0007049; P:GO:0051301; C:GO:0005886; C:GO:0016021	P:cell cycle; P:cell division; C:plasma membrane; C:integral component of membrane	0	-2.34	0	0
834	Cgl2204	ilvE	BRANCHED-CHAIN AMINO ACID AMINOTRANSFERASE	0	-2.82	-2.49	-2.21	P:GO:0009097; P:GO:0009098; P:GO:0009099; F:GO:0016829; F:GO:0052654; F:GO:0052655; F:GO:0052656	P:isoleucine biosynthetic process; P:leucine biosynthetic process; P:valine biosynthetic process; F:lyase activity; F:L-leucine transaminase activity; F:L-valine transaminase activity; F:L-isoleucine transaminase activity	1.7e-10	-2.82	0	0
835	Cgl1110	-	DNA-binding protein	0	-2.59	-2.83	-2.22	P:GO:0009691; F:GO:0003677; F:GO:0016787	P:cytokinin biosynthetic process; F:DNA binding; F:hydrolase activity	1.4e-05	-2.59	0	0
836	Cgl1316	leuD	3-isopropylmalate dehydratase small subunit	0	-2.54	-2.53	-2.22	P:GO:0009082; P:GO:0009098; F:GO:0003861; F:GO:0016853; C:GO:0009316	P:branched-chain amino acid biosynthetic process; P:leucine biosynthetic process; F:3-isopropylmalate dehydratase activity; F:isomerase activity; C:3-isopropylmalate dehydratase complex	0	-2.54	0	0
837	Cgl1391	-	SGNH/GDSL hydrolase family protein	0	-2.27	-2.18	-2.22	F:GO:0052689	F:carboxylic ester hydrolase activity	2.2e-19	-2.27	0	0
838	Cgl1617	-	hypothetical protein	0	-2.4	-2.08	-2.22	0	0	0	-2.4	0	0
839	Cgl2171	metF	5,10-Methylenetetrahydrofolate Reductase	0	0	0	-2.22	P:GO:0009086; P:GO:0035999; F:GO:0004489; C:GO:0005829	P:methionine biosynthetic process; P:tetrahydrofolate interconversion; F:methylenetetrahydrofolate reductase (NAD(P)H) activity; C:cytosol	0.13	-1.28	0.0015	1.8e-08
840	Cgl2668	vdh	aldehyde dehydrogenase	0	-2.27	-2.25	-2.22	F:GO:0016620	F:oxidoreductase activity, acting on the aldehyde or oxo group of donors, NAD or NADP as acceptor	0.52	0.95	2.4e-08	2.1e-08
841	Cgl2770	fda	fructose-bisphosphate aldolase	0	-2.16	-4.02	-2.22	P:GO:0006096; F:GO:0004332; F:GO:0008270	P:glycolytic process; F:fructose-bisphosphate aldolase activity; F:zinc ion binding	0	-2.16	0	0
842	Cgl0400	-	long-chain fatty acid--CoA ligase	0	0	-2.01	-2.23	P:GO:0001676; F:GO:0004467; F:GO:0102391	P:long-chain fatty acid metabolic process; F:long-chain fatty acid-CoA ligase activity; F:decanoate-CoA ligase activity	4.7e-05	-1.89	0	0
843	Cgl0561	rpsM	30S ribosomal protein S13	-2.26	-4.05	-3.81	-2.23	P:GO:0006412; F:GO:0000049; F:GO:0003735; F:GO:0019843; C:GO:0005840	P:translation; F:tRNA binding; F:structural constituent of ribosome; F:rRNA binding; C:ribosome	0	-4.05	0	0
844	Cgl0804	smpB	SsrA-binding protein	0	0	0	-2.23	P:GO:0070929; F:GO:0003723; C:GO:0005737	P:trans-translation; F:RNA binding; C:cytoplasm	2e-10	-1.76	2e-16	0
845	Cgl1577	opcA	oxppcycle protein OpcA	0	-2.58	-2.31	-2.23	0	0	0	-2.58	0	0
846	Cgl0518	-	30S ribosomal protein S17	0	-4.87	-5.33	-2.25	P:GO:0006412; F:GO:0003735; F:GO:0019843; C:GO:0005840	P:translation; F:structural constituent of ribosome; F:rRNA binding; C:ribosome	0	-4.87	0	0
847	Cgl1529	mcmB	methylmalonyl-CoA mutase	0	0	0	-2.25	F:GO:0004494; F:GO:0031419; F:GO:0046872	F:methylmalonyl-CoA mutase activity; F:cobalamin binding; F:metal ion binding	0.0076	-1.05	0.00064	1e-11
848	Cgl2095	impA	histidinol-phosphatase	0	0	0	-2.25	P:GO:0046855; F:GO:0004401	P:inositol phosphate dephosphorylation; F:histidinol-phosphatase activity	5.2e-05	-1.12	0.00013	7.2e-12
849	Cgl1907	-	antitoxin HicB	0	0	0	-2.26	0	0	0.022	-0.21	0.85	1.3e-08
850	Cgl2531	nrdI	ribonucleotide reductase stimulatory protein	0	0	0	-2.26	P:GO:0006464; F:GO:0010181	P:cellular protein modification process; F:FMN binding	0.067	-1.11	4.9e-05	3.9e-13
851	Cgl2820	-	putative membrane protein	0	0	0	-2.26	F:GO:0047134; C:GO:0016021	F:protein-disulfide reductase activity; C:integral component of membrane	2.4e-06	-1.22	4.7e-06	0
852	Cgl0517	rpsQ	30S ribosomal protein S17	0	-4.89	-5.37	-2.27	P:GO:0006412; F:GO:0003735; F:GO:0019843; C:GO:0005840	P:translation; F:structural constituent of ribosome; F:rRNA binding; C:ribosome	0	-4.89	0	0
853	Cgl0818	-	hypothetical protein cgR_0932	0	0	0	-2.27	0	0	0.00022	-1.14	1e-06	1.3e-15
854	Cgl0087	ureE	urease accessory protein UreE	0	0	0	-2.28	P:GO:0006457; P:GO:0019627; P:GO:0065003; F:GO:0016151; F:GO:0051082; C:GO:0005737	P:protein folding; P:urea metabolic process; P:protein-containing complex assembly; F:nickel cation binding; F:unfolded protein binding; C:cytoplasm	0.018	-1.68	3.3e-06	6.7e-13
855	Cgl1118	glgC	glucose-1-phosphate adenylyltransferase	0	-3.08	-3.49	-2.28	P:GO:0005978; F:GO:0005524; F:GO:0008878	P:glycogen biosynthetic process; F:ATP binding; F:glucose-1-phosphate adenylyltransferase activity	0	-3.08	0	0
856	Cgl1933	ptsI	phosphoenolpyruvate--protein phosphotransferase	0	-2.33	-2.56	-2.28	P:GO:0009401; P:GO:0016310; F:GO:0008965; F:GO:0016301; F:GO:0046872; C:GO:0005737	P:phosphoenolpyruvate-dependent sugar phosphotransferase system; P:phosphorylation; F:phosphoenolpyruvate-protein phosphotransferase activity; F:kinase activity; F:metal ion binding; C:cytoplasm	3e-08	-2.33	0	0
857	Cgl2188	-	C40 family peptidase	0	-2.51	-3.48	-2.28	P:GO:0006508; F:GO:0008234; C:GO:0005576	P:proteolysis; F:cysteine-type peptidase activity; C:extracellular region	0	-2.51	0	0
858	Cgl0044	rodA	Cell division protein FtsW	0	0	0	-2.29	P:GO:0051301; C:GO:0016021	P:cell division; C:integral component of membrane	4.5e-06	-1.22	1.1e-06	0
859	Cgl0413	-	---NA---	0	-3.69	-4.25	-2.29	0	0	0	-3.69	0	0
860	Cgl1002	-	allophanate hydrolase	-2.38	0	0	-2.29	F:GO:0005524; F:GO:0016740; F:GO:0016787	F:ATP binding; F:transferase activity; F:hydrolase activity	3.2e-19	-1.37	1.6e-07	4.2e-15
861	Cgl1609	carB	carbamoyl phosphate synthase large subunit	0	-2.39	-2.57	-2.29	P:GO:0006526; P:GO:0044205; F:GO:0004088; F:GO:0005524; F:GO:0046872	P:arginine biosynthetic process; P:'de novo' UMP biosynthetic process; F:carbamoyl-phosphate synthase (glutamine-hydrolyzing) activity; F:ATP binding; F:metal ion binding	3.9e-06	-2.39	0	0
862	Cgl0630	phr	deoxyribodipyrimidine photolyase	0	-2.47	0	-2.3	P:GO:0018298; F:GO:0016829	P:protein-chromophore linkage; F:lyase activity	0.14	-2.47	2.9e-06	7.5e-10
863	Cgl1973	dapB	dihydrodipicolinate reductase	0	-2.43	0	-2.3	P:GO:0009089; P:GO:0019877; F:GO:0008839; F:GO:0016726; F:GO:0050661; F:GO:0051287; C:GO:0005737	P:lysine biosynthetic process via diaminopimelate; P:diaminopimelate biosynthetic process; F:4-hydroxy-tetrahydrodipicolinate reductase; F:oxidoreductase activity, acting on CH or CH2 groups, NAD or NADP as acceptor; F:NADP binding; F:NAD binding; C:cytoplasm	1.7e-10	-2.43	0	0
864	Cgl0421	-	MFS transporter	0	0	0	-2.31	P:GO:0055085; F:GO:0022857; C:GO:0016021	P:transmembrane transport; F:transmembrane transporter activity; C:integral component of membrane	0.0013	-1.46	1.6e-07	3e-14
865	Cgl1217	-	methylmalonyl-CoA epimerase	-2.35	-2.21	-2.01	-2.31	F:GO:0004493; F:GO:0016829	F:methylmalonyl-CoA epimerase activity; F:lyase activity	0	-2.21	0	0
866	Cgl1587	pgk	phosphoglycerate kinase	0	-2.48	-3.71	-2.31	P:GO:0006096; F:GO:0004618; F:GO:0005524; C:GO:0005737	P:glycolytic process; F:phosphoglycerate kinase activity; F:ATP binding; C:cytoplasm	0.32	-2.48	0	0
867	Cgl2723	-	tubulin-like doman-containing protein	0	0	0	-2.31	0	0	0.015	-1.07	1e-05	1.1e-14
868	Cgl1471	-	putative secreted protein	-2.04	-2.96	-2.95	-2.32	0	0	0	-2.96	0	0
869	Cgl2817	cysI	sulfite reductase	0	-2.64	-2.91	-2.32	F:GO:0020037; F:GO:0046872; F:GO:0050311; F:GO:0051539	F:heme binding; F:metal ion binding; F:sulfite reductase (ferredoxin) activity; F:4 iron, 4 sulfur cluster binding	0.033	-2.64	0	0
870	Cgl2236	-	bifunctional RNase H/acid phosphatase	0	0	0	-2.33	P:GO:0090502; F:GO:0003676; F:GO:0004523	P:RNA phosphodiester bond hydrolysis, endonucleolytic; F:nucleic acid binding; F:RNA-DNA hybrid ribonuclease activity	0.0037	-0.99	0.00091	1.5e-13
871	Cgl2559	pduO	cob(I)yrinic acid a,c-diamide adenosyltransferase	-2.14	0	0	-2.34	P:GO:0009236; F:GO:0005524; F:GO:0008817	P:cobalamin biosynthetic process; F:ATP binding; F:cob(I)yrinic acid a,c-diamide adenosyltransferase activity	0	-1.97	2e-13	0
872	Cgl0297	-	alpha/beta hydrolase	0	0	0	-2.35	F:GO:0016746; F:GO:0033961	F:transferase activity, transferring acyl groups; F:cis-stilbene-oxide hydrolase activity	1.7e-13	-1.79	1.4e-14	0
873	Cgl0876	-	serine protease	0	-3.09	-2.75	-2.35	P:GO:0006508; F:GO:0004252; C:GO:0016021	P:proteolysis; F:serine-type endopeptidase activity; C:integral component of membrane	7.6e-07	-3.09	0	0
874	Cgl0893	metS	methionine--tRNA ligase	0	-2.12	-2.2	-2.35	P:GO:0006431; F:GO:0004825; F:GO:0005524; F:GO:0046872; C:GO:0005737	P:methionyl-tRNA aminoacylation; F:methionine-tRNA ligase activity; F:ATP binding; F:metal ion binding; C:cytoplasm	0.29	-2.12	0	0
875	Cgl1199	rho	transcription termination factor Rho	0	-2.27	-2.24	-2.39	P:GO:0006353; F:GO:0003723; F:GO:0004386; F:GO:0005524; F:GO:0008186	P:DNA-templated transcription, termination; F:RNA binding; F:helicase activity; F:ATP binding; F:RNA-dependent ATPase activity	0.23	-2.27	0	0
876	Cgl2229	glnA2	glutamine synthetase	0	0	0	-2.39	P:GO:0006542; F:GO:0004356	P:glutamine biosynthetic process; F:glutamate-ammonia ligase activity	0.033	-1.35	1.7e-06	4.7e-13
877	Cgl0140	-	hypothetical protein CGBL_0101740	-2.45	-2.33	0	-2.4	0	0	0	-2.33	0	0
878	Cgl0243	-	MULTISPECIES: YbaB/EbfC family nucleoid-associated protein	0	-3.22	-3.24	-2.4	F:GO:0003677; C:GO:0005737; C:GO:0043590	F:DNA binding; C:cytoplasm; C:bacterial nucleoid	0	-3.22	0	0
879	Cgl0263	arsX	low molecular weight phosphatase family protein	0	0	0	-2.4	P:GO:0046685; F:GO:0008794; F:GO:0102100; C:GO:0005737	P:response to arsenic-containing substance; F:arsenate reductase (glutaredoxin) activity; F:mycothiol-arsenate ligase activity; C:cytoplasm	0.52	0.58	0.00027	0.00033
880	Cgl0439	-	TlpA family protein disulfide reductase	0	0	0	-2.4	P:GO:0098869; F:GO:0016209; F:GO:0016491; F:GO:0016853	P:cellular oxidant detoxification; F:antioxidant activity; F:oxidoreductase activity; F:isomerase activity	0.01	-1.08	4.2e-06	7.4e-16
881	Cgl1330	-	glutamate ABC transporter ATP-binding protein	0	0	0	-2.4	P:GO:0003333; F:GO:0005524; F:GO:0015424; F:GO:0016887	P:amino acid transmembrane transport; F:ATP binding; F:ATPase-coupled amino acid transmembrane transporter activity; F:ATPase activity	0.069	-0.88	0.043	1.4e-10
882	Cgl1401	argH	argininosuccinate lyase	0	-2.49	-2.61	-2.4	P:GO:0042450; F:GO:0004056; C:GO:0005737	P:arginine biosynthetic process via ornithine; F:argininosuccinate lyase activity; C:cytoplasm	2.4e-17	-2.49	0	0
883	Cgl1952	gluC	amino acid ABC transporter permease	-3.18	-2.68	-2.81	-2.4	P:GO:0006865; P:GO:0055085; F:GO:0022857; C:GO:0043190	P:amino acid transport; P:transmembrane transport; F:transmembrane transporter activity; C:ATP-binding cassette (ABC) transporter complex	0	-2.68	0	0
884	Cgl0428	-	ABC transporter substrate-binding protein	0	0	0	-2.41	F:GO:0046872	F:metal ion binding	5.2e-07	-1	0.00075	6.8e-11
885	Cgl2089	pyk	pyruvate kinase	0	-4.15	-4.51	-2.41	P:GO:0006096; F:GO:0000287; F:GO:0004743; F:GO:0005524; F:GO:0016301; F:GO:0030955	P:glycolytic process; F:magnesium ion binding; F:pyruvate kinase activity; F:ATP binding; F:kinase activity; F:potassium ion binding	0	-4.15	0	0
886	Cgl2488	-	DUF3618 domain-containing protein	0	0	0	-2.41	C:GO:0016021	C:integral component of membrane	0	-1.8	0	0
887	Cgl0115	-	Fic family protein	0	-2.25	0	-2.43	0	0	0.37	-2.25	0.00021	2.6e-08
888	Cgl0507	rplD	50S ribosomal protein L4	0	-5.6	-5.22	-2.43	P:GO:0006412; F:GO:0003735; F:GO:0019843; C:GO:0005840	P:translation; F:structural constituent of ribosome; F:rRNA binding; C:ribosome	0	-5.6	0	0
889	Cgl1093	-	peptidase S1	0	-2.62	-2.36	-2.43	P:GO:0006508; F:GO:0004252; C:GO:0005576	P:proteolysis; F:serine-type endopeptidase activity; C:extracellular region	1.7e-16	-2.62	0	0
890	Cgl1468	gpt	MULTISPECIES: phosphoribosyltransferase	0	0	0	-2.43	P:GO:0009116; F:GO:0016757	P:nucleoside metabolic process; F:transferase activity, transferring glycosyl groups	0.13	-1.88	2e-05	1.4e-12
891	Cgl2237	-	Zn-ribbon protein	0	0	0	-2.43	0	0	1.1e-10	-1.69	2e-16	0
892	Cgl2726	-	dipeptidase	0	0	0	-2.43	F:GO:0016787	F:hydrolase activity	0.00011	-1.9	1.2e-15	0
893	Cgl0602	-	DUF5319 domain-containing protein	0	0	0	-2.46	0	0	7.1e-05	-1.3	2.9e-06	3.5e-16
894	Cgl0298	-	phage holin family protein	0	0	0	-2.47	C:GO:0016021	C:integral component of membrane	0	-1.64	0	0
895	Cgl2512	-	rhomboid family intramembrane serine protease	0	-2.14	0	-2.48	P:GO:0006508; F:GO:0004252; C:GO:0016021	P:proteolysis; F:serine-type endopeptidase activity; C:integral component of membrane	1.1e-08	-2.14	0	0
896	Cgl2893	serS	seryl-tRNA synthetase	0	0	0	-2.5	P:GO:0006434; P:GO:0016260; P:GO:0097056; F:GO:0004828; F:GO:0005524; C:GO:0005737	P:seryl-tRNA aminoacylation; P:selenocysteine biosynthetic process; P:selenocysteinyl-tRNA(Sec) biosynthetic process; F:serine-tRNA ligase activity; F:ATP binding; C:cytoplasm	0.098	-1.1	1.9e-07	0
897	Cgl1931	-	DeoR/GlpR transcriptional regulator	0	-2.29	0	-2.51	P:GO:0006355; F:GO:0003700; F:GO:0016740; F:GO:0016787	P:regulation of transcription, DNA-templated; F:DNA-binding transcription factor activity; F:transferase activity; F:hydrolase activity	0.0014	-2.29	0	0
898	Cgl1121	-	MULTISPECIES: hypothetical protein	0	0	-2.72	-2.52	0	0	1.7e-15	-1.75	0	0
899	Cgl0082	-	Hypothetical protein	0	0	0	-2.53	0	0	1	-0.22	0.09	3.3e-10
900	Cgl2413	-	Hypothetical protein	0	0	0	-2.54	0	0	0.32	-1.16	0.0066	1.4e-11
901	Cgl2104	-	putative membrane protein	-2.36	-3.29	-2.63	-2.55	C:GO:0016021	C:integral component of membrane	0	-3.29	0	0
902	Cgl0939	rplY	50S ribosomal protein L25/general stress protein Ctc	-2.5	-4.45	-4.37	-2.56	P:GO:0006412; F:GO:0003735; F:GO:0008097; C:GO:0005840	P:translation; F:structural constituent of ribosome; F:5S rRNA binding; C:ribosome	0	-4.45	0	0
903	Cgl0969	-	MULTISPECIES: antitoxin	-2.23	-3.12	-3.3	-2.56	0	0	0	-3.12	0	0
904	Cgl1188	narH	nitrate reductase subunit beta	0	-2.18	-2.14	-2.56	P:GO:0042126; F:GO:0008940; C:GO:0009325	P:nitrate metabolic process; F:nitrate reductase activity; C:nitrate reductase complex	1.3e-07	-2.18	0	0
905	Cgl2225	-	MFS transporter	-2.21	-2.89	-2.75	-2.56	P:GO:0055085; F:GO:0022857; C:GO:0016021	P:transmembrane transport; F:transmembrane transporter activity; C:integral component of membrane	0	-2.89	0	0
906	Cgl0189	-	SDR family oxidoreductase	0	-2.5	-2.88	-2.58	F:GO:0004316; F:GO:0102131; F:GO:0102132	F:3-oxoacyl-[acyl-carrier-protein] reductase (NADPH) activity; F:3-oxo-glutaryl-[acp] methyl ester reductase activity; F:3-oxo-pimeloyl-[acp] methyl ester reductase activity	5.1e-05	-2.5	0	0
907	Cgl0610	-	PspC domain-containing protein	0	-2.75	-2.88	-2.58	C:GO:0005886; C:GO:0016021	C:plasma membrane; C:integral component of membrane	8.8e-14	-2.75	0	0
908	Cgl0802	ftsE	phosphonate ABC transporter ATP-binding protein	0	0	0	-2.58	P:GO:0007049; P:GO:0051301; P:GO:0071702; F:GO:0005524; F:GO:0016887; C:GO:0005886	P:cell cycle; P:cell division; P:organic substance transport; F:ATP binding; F:ATPase activity; C:plasma membrane	8.1e-14	-1.98	0	0
909	Cgl1331	-	amino acid ABC transporter permease	0	0	0	-2.58	P:GO:0055085; P:GO:0071705; F:GO:0022857; C:GO:0043190	P:transmembrane transport; P:nitrogen compound transport; F:transmembrane transporter activity; C:ATP-binding cassette (ABC) transporter complex	0.067	-0.6	0.11	6.8e-11
910	Cgl2596	ptrB	S9 family peptidase	0	0	0	-2.58	P:GO:0006508; F:GO:0004252	P:proteolysis; F:serine-type endopeptidase activity	0.056	-0.9	0.0043	7.3e-13
911	Cgl0043	pbpA	penicillin-binding protein	0	0	0	-2.59	P:GO:0006508; P:GO:0051301; F:GO:0004180; F:GO:0008658; F:GO:0008955	P:proteolysis; P:cell division; F:carboxypeptidase activity; F:penicillin binding; F:peptidoglycan glycosyltransferase activity	7.9e-06	-0.85	0.00087	2.9e-15
912	Cgl0541	rpmD	50S ribosomal protein L30	0	-4.97	-5.12	-2.59	P:GO:0006412; F:GO:0003735; C:GO:0015934	P:translation; F:structural constituent of ribosome; C:large ribosomal subunit	0	-4.97	0	0
913	Cgl0701	thtR	sulfurtransferase	0	-2.06	-2.39	-2.59	F:GO:0004792	F:thiosulfate sulfurtransferase activity	0	-2.06	0	0
914	Cgl1096	-	DUF402 domain-containing protein	0	-2.72	-2.67	-2.59	0	0	0	-2.72	0	0
915	Cgl1941	-	hypothetical protein cgR_1771	0	0	0	-2.59	0	0	0.00013	-1.2	1.6e-06	0
916	Cgl1987	nusA	transcription elongation factor NusA	0	-2.72	-2.64	-2.59	P:GO:0006414; P:GO:0031564; F:GO:0003700; F:GO:0003746; C:GO:0005737	P:translational elongation; P:transcription antitermination; F:DNA-binding transcription factor activity; F:translation elongation factor activity; C:cytoplasm	1.5e-08	-2.72	0	0
917	Cgl3036	rmpC	PTS ascorbate transporter subunit IIC	0	0	0	-2.59	P:GO:0009401; C:GO:0005886; C:GO:0016021	P:phosphoenolpyruvate-dependent sugar phosphotransferase system; C:plasma membrane; C:integral component of membrane	0.22	-0.96	2.4e-05	0
918	Cgl1630	-	ABC transporter substrate-binding protein	0	-2.19	-2.23	-2.6	P:GO:0009252; P:GO:0071555; F:GO:0008932; F:GO:0016829; C:GO:0005887	P:peptidoglycan biosynthetic process; P:cell wall organization; F:lytic endotransglycosylase activity; F:lyase activity; C:integral component of plasma membrane	3.1e-19	-2.19	0	0
919	Cgl2731	mrpD	Na+/H+ antiporter subunit D	0	0	0	-2.61	P:GO:0042773; F:GO:0008137; C:GO:0016021	P:ATP synthesis coupled electron transport; F:NADH dehydrogenase (ubiquinone) activity; C:integral component of membrane	1.4e-08	-0.93	5.5e-05	0
920	Cgl2752	ackA	acetate kinase	-2.82	-3.02	-2.93	-2.61	P:GO:0006082; P:GO:0006085; P:GO:0016310; F:GO:0000287; F:GO:0005524; F:GO:0008776; C:GO:0005737	P:organic acid metabolic process; P:acetyl-CoA biosynthetic process; P:phosphorylation; F:magnesium ion binding; F:ATP binding; F:acetate kinase activity; C:cytoplasm	0	-3.02	0	0
921	Cgl0866	rpsR	30S ribosomal protein S18	0	-4.96	-5.44	-2.62	P:GO:0006412; F:GO:0003735; F:GO:0019843; C:GO:0005840	P:translation; F:structural constituent of ribosome; F:rRNA binding; C:ribosome	0	-4.96	0	0
922	Cgl1607	ihf	putative integration host factor cIHF	-3.22	-4.15	-4.13	-2.62	0	0	0	-4.15	0	0
923	Cgl2123	-	RNA-binding S4 domain-containing protein	0	-3	-2.8	-2.62	P:GO:0034605; F:GO:0003677; F:GO:0003727; F:GO:0043023	P:cellular response to heat; F:DNA binding; F:single-stranded RNA binding; F:ribosomal large subunit binding	0	-3	0	0
924	Cgl2418	-	MULTISPECIES: hypothetical protein	-2.8	-4.28	-3.67	-2.62	0	0	0	-4.28	0	0
925	Cgl2541	pgm	phosphoglucomutase	0	0	-2.11	-2.62	P:GO:0005975; F:GO:0000287; F:GO:0004614	P:carbohydrate metabolic process; F:magnesium ion binding; F:phosphoglucomutase activity	0.14	-1.9	0	0
926	Cgl0412	-	Hypothetical protein	0	-2.53	-3.66	-2.63	0	0	1.2e-05	-2.53	0	0
927	Cgl2687	lysS	lysine--tRNA ligase	0	0	0	-2.63	P:GO:0006430; F:GO:0000287; F:GO:0003676; F:GO:0004824; F:GO:0005524; C:GO:0005737	P:lysyl-tRNA aminoacylation; F:magnesium ion binding; F:nucleic acid binding; F:lysine-tRNA ligase activity; F:ATP binding; C:cytoplasm	0.024	-1.94	0	0
928	Cgl0700	accBC	pyruvate carboxylase	-2.52	-3.73	-3.9	-2.64	F:GO:0004075; F:GO:0005524; F:GO:0046872	F:biotin carboxylase activity; F:ATP binding; F:metal ion binding	0	-3.73	0	0
929	Cgl0769	-	putative membrane protein	0	0	0	-2.64	C:GO:0016021	C:integral component of membrane	4.7e-10	-1.86	9.8e-15	0
930	Cgl2664	-	putative secreted protein	0	0	-2.4	-2.64	0	0	4.8e-14	-1.99	0	0
931	Cgl2989	-	universal stress protein	0	-2.12	-2.23	-2.64	0	0	1.2e-12	-2.12	0	0
932	Cgl1271	ilvB	acetolactate synthase large subunit	0	-2.67	-2.61	-2.67	P:GO:0009097; P:GO:0009099; F:GO:0000287; F:GO:0003984; F:GO:0030976; F:GO:0050660	P:isoleucine biosynthetic process; P:valine biosynthetic process; F:magnesium ion binding; F:acetolactate synthase activity; F:thiamine pyrophosphate binding; F:flavin adenine dinucleotide binding	0	-2.67	0	0
933	Cgl1224	glgB	1,4-alpha-glucan branching protein GlgB	0	-2.22	-2.58	-2.68	P:GO:0005978; F:GO:0003844; F:GO:0004553; F:GO:0043169; F:GO:0102752	P:glycogen biosynthetic process; F:1,4-alpha-glucan branching enzyme activity; F:hydrolase activity, hydrolyzing O-glycosyl compounds; F:cation binding; F:1,4-alpha-glucan branching enzyme activity (using a glucosylated glycogenin as primer for glycogen synthesis)	2.1e-17	-2.22	0	0
934	Cgl2642	ptsS	PTS beta-glucoside transporter subunit EIIBCA	0	-2.11	-2.74	-2.68	P:GO:0009401; P:GO:0016310; P:GO:0034219; F:GO:0008982; F:GO:0016301; C:GO:0005886; C:GO:0016021	P:phosphoenolpyruvate-dependent sugar phosphotransferase system; P:phosphorylation; P:carbohydrate transmembrane transport; F:protein-N(PI)-phosphohistidine-sugar phosphotransferase activity; F:kinase activity; C:plasma membrane; C:integral component of membrane	0	-2.11	0	0
935	Cgl0333	rmlCD	dTDP-4-dehydrorhamnose reductase	0	0	0	-2.69	P:GO:0019305; F:GO:0008830; F:GO:0008831	P:dTDP-rhamnose biosynthetic process; F:dTDP-4-dehydrorhamnose 3,5-epimerase activity; F:dTDP-4-dehydrorhamnose reductase activity	0.073	-1.31	1.4e-07	0
936	Cgl0543	-	30S ribosomal protein S5	0	-5.07	-5.36	-2.69	P:GO:0006412; F:GO:0003735; F:GO:0019843; C:GO:0015934; C:GO:0015935	P:translation; F:structural constituent of ribosome; F:rRNA binding; C:large ribosomal subunit; C:small ribosomal subunit	0	-5.07	0	0
937	Cgl1575	tal	transaldolase	0	-3.66	-3.53	-2.69	P:GO:0005975; P:GO:0006098; F:GO:0004801; C:GO:0005737	P:carbohydrate metabolic process; P:pentose-phosphate shunt; F:sedoheptulose-7-phosphate:D-glyceraldehyde-3-phosphate glyceronetransferase activity; C:cytoplasm	0	-3.66	0	0
938	Cgl2107	glgX	glycogen debranching protein GlgX	0	-2.51	-2.36	-2.69	P:GO:0005980; F:GO:0004133; F:GO:0004553	P:glycogen catabolic process; F:glycogen debranching enzyme activity; F:hydrolase activity, hydrolyzing O-glycosyl compounds	9.1e-20	-2.51	0	0
939	Cgl2579	-	fatty acid-binding protein	0	-2.6	-2.44	-2.7	P:GO:0046907	P:intracellular transport	0.79	-2.6	0	0
940	Cgl0867	rpsN	30S ribosomal protein S14	0	-5.32	-5.45	-2.72	P:GO:0006412; F:GO:0003735; F:GO:0019843; C:GO:0005840	P:translation; F:structural constituent of ribosome; F:rRNA binding; C:ribosome	0	-5.32	0	0
941	Cgl1098	-	GTP-binding protein TypA	0	-2.87	-3.03	-2.72	P:GO:0006414; F:GO:0003746; F:GO:0003924; F:GO:0005525	P:translational elongation; F:translation elongation factor activity; F:GTPase activity; F:GTP binding	0.17	-2.87	0	0
942	Cgl1913	-	putative membrane protein	0	-2.81	-2.67	-2.72	C:GO:0016021	C:integral component of membrane	0	-2.81	0	0
943	Cgl2361	-	50S ribosomal protein L27	0	-4.88	-5.34	-2.72	P:GO:0006412; F:GO:0003735; C:GO:0005840	P:translation; F:structural constituent of ribosome; C:ribosome	0	-4.88	0	0
944	Cgl0681	-	MULTISPECIES: hypothetical protein	0	0	0	-2.73	0	0	0.0067	-1.67	4.1e-14	0
945	Cgl1393	-	---NA---	0	-2.25	-2.08	-2.73	0	0	4e-17	-2.25	0	0
946	Cgl2599	-	aspartate aminotransferase	0	-2.01	-2.06	-2.73	P:GO:0009058; F:GO:0004069; F:GO:0030170	P:biosynthetic process; F:L-aspartate:2-oxoglutarate aminotransferase activity; F:pyridoxal phosphate binding	2.8e-08	-2.01	0	0
947	Cgl1190	narK	MFS transporter	0	-2.57	-2.59	-2.74	P:GO:0055085; F:GO:0022857; C:GO:0016021	P:transmembrane transport; F:transmembrane transporter activity; C:integral component of membrane	0.0013	-2.57	0	0
948	Cgl2586	-	acyl-CoA thioesterase	0	-2.21	-2.15	-2.74	F:GO:0016790	F:thiolester hydrolase activity	0	-2.21	0	0
949	Cgl3010	-	VanZ family protein	0	-2.73	-2.35	-2.74	C:GO:0016021	C:integral component of membrane	5.1e-15	-2.73	0	0
950	Cgl0155	pepO	peptidase M13	0	-2.61	-2.78	-2.75	P:GO:0006508; F:GO:0004222; F:GO:0046872	P:proteolysis; F:metalloendopeptidase activity; F:metal ion binding	0	-2.61	0	0
951	Cgl2351	-	MULTISPECIES: ribosome silencing factor	0	-2.77	-2.87	-2.75	P:GO:0017148; P:GO:0042256; P:GO:0090071; C:GO:0005737	P:negative regulation of translation; P:mature ribosome assembly; P:negative regulation of ribosome biogenesis; C:cytoplasm	0	-2.77	0	0
952	Cgl1993	-	ABC transporter ATP-binding protein	-2.06	0	0	-2.76	P:GO:0015833; F:GO:0005524; F:GO:0016887	P:peptide transport; F:ATP binding; F:ATPase activity	6e-19	-1.61	5.5e-11	0
953	Cgl2362	rpmA	50S ribosomal protein L27	0	-5.01	-5.72	-2.76	P:GO:0006412; F:GO:0003735; C:GO:0005840	P:translation; F:structural constituent of ribosome; C:ribosome	0	-5.01	0	0
954	Cgl2037	rplS	50S ribosomal protein L19	0	-3.87	-3.89	-2.77	P:GO:0006412; F:GO:0003735; C:GO:0005840	P:translation; F:structural constituent of ribosome; C:ribosome	0	-3.87	0	0
955	Cgl0598	groEL	chaperonin GroEL	-3.23	-4.99	-5.54	-2.78	P:GO:0042026; F:GO:0005524; F:GO:0051082; C:GO:0005737	P:protein refolding; F:ATP binding; F:unfolded protein binding; C:cytoplasm	0	-4.99	0	0
956	Cgl0954	ggtB	gamma-glutamyltransferase	-3.15	-2.66	-2.5	-2.78	P:GO:0006508; P:GO:0006751; F:GO:0036374; F:GO:0102953; F:GO:0103068	P:proteolysis; P:glutathione catabolic process; F:glutathione hydrolase activity; F:hypoglycin A gamma-glutamyl transpeptidase activity; F:leukotriene C4 gamma-glutamyl transferase activity	0	-2.66	0	0
957	Cgl0003	dnaN	DNA polymerase III subunit beta	0	0	0	-2.79	P:GO:0006260; P:GO:0071897; P:GO:0090305; F:GO:0003677; F:GO:0003887; F:GO:0008408; C:GO:0005737; C:GO:0009360	P:DNA replication; P:DNA biosynthetic process; P:nucleic acid phosphodiester bond hydrolysis; F:DNA binding; F:DNA-directed DNA polymerase activity; F:3'-5' exonuclease activity; C:cytoplasm; C:DNA polymerase III complex	0.00015	-1.77	0	0
958	Cgl1585	ppc	phosphoenolpyruvate carboxylase	0	-3.59	-3.53	-2.79	P:GO:0006099; P:GO:0006107; P:GO:0015977; F:GO:0000287; F:GO:0008964	P:tricarboxylic acid cycle; P:oxaloacetate metabolic process; P:carbon fixation; F:magnesium ion binding; F:phosphoenolpyruvate carboxylase activity	6.5e-12	-3.59	0	0
959	Cgl2026	rpsB	30S ribosomal protein S2	0	-5.65	-5.62	-2.79	P:GO:0006412; F:GO:0003735; C:GO:0015935	P:translation; F:structural constituent of ribosome; C:small ribosomal subunit	0	-5.65	0	0
960	Cgl2722	-	putative membrane protein	0	0	0	-2.79	C:GO:0016021	C:integral component of membrane	2.7e-05	-1.37	7.9e-05	4e-16
961	Cgl0926	-	membrane protein	0	-2.5	-2.03	-2.8	C:GO:0016021	C:integral component of membrane	6.3e-08	-2.5	1.4e-10	0
962	Cgl1591	-	glmZ(sRNA)-inactivating NTPase	0	-2.38	-2.38	-2.8	P:GO:0016310; F:GO:0005524; F:GO:0005525; F:GO:0016301	P:phosphorylation; F:ATP binding; F:GTP binding; F:kinase activity	2.8e-13	-2.38	0	0
963	Cgl0190	-	FAD-binding oxidoreductase	0	-2.88	-3.4	-2.81	F:GO:0003885; F:GO:0071949; C:GO:0016020	F:D-arabinono-1,4-lactone oxidase activity; F:FAD binding; C:membrane	1.1e-09	-2.88	0	0
964	Cgl1187	narJ	nitrate reductase molybdenum cofactor assembly chaperone	0	0	0	-2.81	P:GO:0042128; P:GO:0051131; F:GO:0008940; F:GO:0051082	P:nitrate assimilation; P:chaperone-mediated protein complex assembly; F:nitrate reductase activity; F:unfolded protein binding	4.1e-10	-1.84	2.8e-12	0
965	Cgl0369	-	Cro/Cl family transcriptional regulator	0	0	-2.07	-2.82	P:GO:0006355; F:GO:0003677	P:regulation of transcription, DNA-templated; F:DNA binding	2e-08	-1.82	0	0
966	Cgl0540	rpsE	30S ribosomal protein S5	0	-4.98	-5.34	-2.82	P:GO:0006412; F:GO:0003735; F:GO:0019843; C:GO:0015935	P:translation; F:structural constituent of ribosome; F:rRNA binding; C:small ribosomal subunit	0	-4.98	0	0
967	Cgl0950	-	hypothetical protein CGBL_0110350	0	-3.71	-5.26	-2.82	0	0	0.011	-3.71	0	0
968	Cgl1953	gluD	glutamate ABC transporter permease	-3.07	-2.75	-2.55	-2.83	P:GO:0006865; P:GO:0055085; F:GO:0022857; C:GO:0043190	P:amino acid transport; P:transmembrane transport; F:transmembrane transporter activity; C:ATP-binding cassette (ABC) transporter complex	0	-2.75	0	0
969	Cgl2250	-	ABC transporter permease	-2.68	-2.46	-2.55	-2.83	P:GO:0055085; F:GO:0022857; C:GO:0005886; C:GO:0016021	P:transmembrane transport; F:transmembrane transporter activity; C:plasma membrane; C:integral component of membrane	0	-2.46	0	0
970	Cgl2607	cgtR3	DNA-binding response regulator	0	-2.92	-2.95	-2.83	P:GO:0000160; P:GO:0006355; F:GO:0003677	P:phosphorelay signal transduction system; P:regulation of transcription, DNA-templated; F:DNA binding	0	-2.92	0	0
971	Cgl2878	cmt2	esterase family protein	0	-3.54	-4.06	-2.83	0	0	0	-3.54	0	0
972	Cgl2205	pepB	leucyl aminopeptidase	0	-2.32	-2.48	-2.84	P:GO:0006508; F:GO:0030145; F:GO:0070006; C:GO:0005737	P:proteolysis; F:manganese ion binding; F:metalloaminopeptidase activity; C:cytoplasm	6.2e-12	-2.32	0	0
973	Cgl0510	rplB	50S ribosomal protein L2	0	-5.57	-5.37	-2.85	P:GO:0006412; F:GO:0003735; F:GO:0016740; F:GO:0019843; C:GO:0015934	P:translation; F:structural constituent of ribosome; F:transferase activity; F:rRNA binding; C:large ribosomal subunit	0	-5.57	0	0
974	Cgl2517	-	nicotinate phosphoribosyltransferase	0	0	0	-2.85	P:GO:0009435; F:GO:0004514; F:GO:0004516	P:NAD biosynthetic process; F:nicotinate-nucleotide diphosphorylase (carboxylating) activity; F:nicotinate phosphoribosyltransferase activity	0.12	-0.57	0.013	1.1e-15
975	Cgl1416	-	copper transporter	0	0	-2.05	-2.86	P:GO:0055070; C:GO:0016020	P:copper ion homeostasis; C:membrane	2.1e-12	-1.96	0	0
976	Cgl1006	-	divalent metal cation transporter	0	0	0	-2.87	P:GO:0030001; F:GO:0046873; C:GO:0016021	P:metal ion transport; F:metal ion transmembrane transporter activity; C:integral component of membrane	7.2e-07	-1.48	1.7e-11	0
977	Cgl2746	-	multidrug ABC transporter permease	0	0	0	-2.88	C:GO:0016021	C:integral component of membrane	1.3e-05	-1.91	7e-13	0
978	Cgl0260	-	Hypothetical membrane protein	0	0	0	-2.89	C:GO:0016021	C:integral component of membrane	0.61	-1.46	6.6e-10	0
979	Cgl0629	-	SDR family oxidoreductase	-2.22	-3.9	-3.31	-2.89	C:GO:0016021	C:integral component of membrane	0	-3.9	0	0
980	Cgl1027	-	amino acid permease	0	0	0	-2.89	C:GO:0016021	C:integral component of membrane	0.1	-0.74	0.021	8.3e-15
981	Cgl0946	-	ABC transporter ATP-binding protein	0	-3.76	-4.7	-2.9	F:GO:0005524; F:GO:0016887	F:ATP binding; F:ATPase activity	0	-3.76	0	0
982	Cgl1180	lysA	diaminopimelate decarboxylase	0	0	-2.16	-2.9	P:GO:0009089; F:GO:0008836; F:GO:0030170	P:lysine biosynthetic process via diaminopimelate; F:diaminopimelate decarboxylase activity; F:pyridoxal phosphate binding	9.4e-06	-1.92	0	0
983	Cgl1395	argJ	bifunctional glutamate N-acetyltransferase/amino-acid acetyltransferase ArgJ	0	-3.11	-2.8	-2.9	P:GO:0006526; F:GO:0004042; F:GO:0004358; F:GO:0103045; C:GO:0005737	P:arginine biosynthetic process; F:acetyl-CoA:L-glutamate N-acetyltransferase activity; F:glutamate N-acetyltransferase activity; F:methione N-acyltransferase activity; C:cytoplasm	0	-3.11	0	0
984	Cgl1615	-	YbjN domain-containing protein	-2.39	-3.13	-3	-2.9	0	0	0	-3.13	0	0
985	Cgl0024	-	organic hydroperoxide resistance protein	0	0	0	-2.91	P:GO:0006979	P:response to oxidative stress	0.63	-1.25	4.4e-07	0
986	Cgl0486	rplL	50S ribosomal protein L7/L12	0	-4.4	-5.77	-2.91	P:GO:0006412; F:GO:0003735; C:GO:0005840	P:translation; F:structural constituent of ribosome; C:ribosome	0	-4.4	0	0
987	Cgl1649	ppiB	peptidylprolyl isomerase	0	0	0	-2.91	P:GO:0000413; F:GO:0003755; C:GO:0016021	P:protein peptidyl-prolyl isomerization; F:peptidyl-prolyl cis-trans isomerase activity; C:integral component of membrane	1.1e-12	-1.34	0	0
988	Cgl3035	trpA	tryptophan synthase subunit alpha	0	0	0	-2.91	P:GO:0000162; F:GO:0004834	P:tryptophan biosynthetic process; F:tryptophan synthase activity	0.29	-1.29	2.7e-06	0
989	Cgl1097	-	putative secreted protein	0	-3.01	-2.74	-2.92	0	0	4.9e-16	-3.01	0	0
990	Cgl1374	-	DoxX family protein	0	-3.84	-4.41	-2.93	C:GO:0016021	C:integral component of membrane	0	-3.84	0	0
991	Cgl1658	secD	Preprotein translocase subunit SecD	0	0	-2.03	-2.93	P:GO:0006605; P:GO:0043952; P:GO:0065002; F:GO:0015450; C:GO:0005886; C:GO:0016021	P:protein targeting; P:protein transport by the Sec complex; P:intracellular protein transmembrane transport; F:P-P-bond-hydrolysis-driven protein transmembrane transporter activity; C:plasma membrane; C:integral component of membrane	2.2e-08	-2	0	0
992	Cgl2075	-	DNA-binding protein	0	-2.85	-2.6	-2.93	F:GO:0003677; C:GO:0005840	F:DNA binding; C:ribosome	0	-2.85	0	0
993	Cgl2590	purS	phosphoribosylformylglycinamidine synthase subunit PurS	-2.07	-2.77	-2.96	-2.94	P:GO:0006189; F:GO:0004642; F:GO:0005524; C:GO:0005737	P:'de novo' IMP biosynthetic process; F:phosphoribosylformylglycinamidine synthase activity; F:ATP binding; C:cytoplasm	0	-2.77	0	0
994	Cgl0497	tuf	elongation factor Tu	0	-6.12	-6.71	-2.95	P:GO:0006414; F:GO:0003746; F:GO:0003924; F:GO:0005525; C:GO:0005737	P:translational elongation; F:translation elongation factor activity; F:GTPase activity; F:GTP binding; C:cytoplasm	0	-6.12	0	0
995	Cgl1588	gap	glyceraldehyde-3-phosphate dehydrogenase	0	0	-4.05	-2.95	P:GO:0006006; P:GO:0006096; F:GO:0004365; F:GO:0050661; F:GO:0051287; C:GO:0005737	P:glucose metabolic process; P:glycolytic process; F:glyceraldehyde-3-phosphate dehydrogenase (NAD+) (phosphorylating) activity; F:NADP binding; F:NAD binding; C:cytoplasm	7.7e-13	-1.75	0	0
996	Cgl2601	-	HIT family hydrolase	0	0	0	-2.95	F:GO:0016787	F:hydrolase activity	0.48	-1.88	1.4e-10	0
997	Cgl2703	-	DUF350 domain-containing protein	0	0	0	-2.95	C:GO:0005886; C:GO:0016021	C:plasma membrane; C:integral component of membrane	0.37	-0.62	0.12	1.1e-14
998	Cgl0560	infA	translation initiation factor IF-1	0	-4.17	-4	-2.97	P:GO:0006413; F:GO:0003743; F:GO:0019843; F:GO:0043022; C:GO:0005737	P:translational initiation; F:translation initiation factor activity; F:rRNA binding; F:ribosome binding; C:cytoplasm	0	-4.17	0	0
999	Cgl2402	catA	hydroxyquinol 1,2-dioxygenase	-2.76	-2.37	-2.3	-2.97	P:GO:0009712; P:GO:0019439; F:GO:0008199; F:GO:0018576	P:catechol-containing compound metabolic process; P:aromatic compound catabolic process; F:ferric iron binding; F:catechol 1,2-dioxygenase activity	0	-2.37	0	0
1000	Cgl0201	-	ABC transporter permease	0	0	0	-2.98	C:GO:0016021	C:integral component of membrane	0.59	-0.85	0.0032	0
1001	Cgl1160	catA2	hydroxyquinol 1,2-dioxygenase	0	0	0	-2.98	P:GO:0009712; P:GO:0019439; F:GO:0008199; F:GO:0018576	P:catechol-containing compound metabolic process; P:aromatic compound catabolic process; F:ferric iron binding; F:catechol 1,2-dioxygenase activity	0.35	0.8	1.3e-05	0.0004
1002	Cgl2892	-	1-acyl-sn-glycerol-3-phosphate acyltransferase	0	0	0	-2.98	F:GO:0003841	F:1-acylglycerol-3-phosphate O-acyltransferase activity	0.14	-0.41	0.1	4.7e-14
1003	Cgl0135	panD	aspartate 1-decarboxylase	-2.19	0	0	-2.99	P:GO:0006523; P:GO:0015940; F:GO:0004068; C:GO:0005737	P:alanine biosynthetic process; P:pantothenate biosynthetic process; F:aspartate 1-decarboxylase activity; C:cytoplasm	0	-1.88	0	0
1004	Cgl0925	menG	regulator of ribonuclease activity	-2.43	-3.1	-2.65	-2.99	P:GO:0043086; P:GO:0051252; F:GO:0008428; F:GO:0008948; F:GO:0046872; F:GO:0047443	P:negative regulation of catalytic activity; P:regulation of RNA metabolic process; F:ribonuclease inhibitor activity; F:oxaloacetate decarboxylase activity; F:metal ion binding; F:4-hydroxy-4-methyl-2-oxoglutarate aldolase activity	0	-3.1	0	0
1005	Cgl1004	-	LamB/YcsF family protein	0	0	0	-2.99	P:GO:0005975; F:GO:0005524; F:GO:0017168	P:carbohydrate metabolic process; F:ATP binding; F:5-oxoprolinase (ATP-hydrolyzing) activity	8.9e-05	-0.98	0.00095	2.3e-16
1006	Cgl2844	-	aminotransferase	0	-2.27	-2.29	-2.99	P:GO:0009058; F:GO:0004021; F:GO:0004069; F:GO:0030170	P:biosynthetic process; F:L-alanine:2-oxoglutarate aminotransferase activity; F:L-aspartate:2-oxoglutarate aminotransferase activity; F:pyridoxal phosphate binding	1.7e-06	-2.27	0	0
1007	Cgl0334	rmlB1	dTDP-glucose 4,6-dehydratase	0	0	0	-3.01	P:GO:0009225; F:GO:0008460	P:nucleotide-sugar metabolic process; F:dTDP-glucose 4,6-dehydratase activity	7.6e-05	-1.64	5.4e-12	0
1008	Cgl1423	-	GNAT family N-acetyltransferase	-2.06	-2.39	-2.06	-3.01	F:GO:0008080	F:N-acetyltransferase activity	0	-2.39	0	0
1009	Cgl0659	prpC2	citrate synthase	0	0	0	-3.03	P:GO:0006099; P:GO:0019679; F:GO:0036440; F:GO:0050440; C:GO:0005737	P:tricarboxylic acid cycle; P:propionate metabolic process, methylcitrate cycle; F:citrate synthase activity; F:2-methylcitrate synthase activity; C:cytoplasm	2.2e-07	-1.83	5.9e-14	0
1010	Cgl0377	-	MULTISPECIES: hypothetical protein	0	0	-2.37	-3.04	0	0	0	-1.52	0	0
1011	Cgl1618	nusB	transcription antitermination factor NusB	0	-3.2	-3.57	-3.04	P:GO:0006355; P:GO:0031564; F:GO:0003723	P:regulation of transcription, DNA-templated; P:transcription antitermination; F:RNA binding	0	-3.2	0	0
1012	Cgl1623	aroC	chorismate synthase	0	0	0	-3.04	P:GO:0008652; P:GO:0009073; P:GO:0009423; F:GO:0004107	P:cellular amino acid biosynthetic process; P:aromatic amino acid family biosynthetic process; P:chorismate biosynthetic process; F:chorismate synthase activity	6.6e-05	-1.36	7.1e-09	0
1013	Cgl0916	-	antibiotic biosynthesis monooxygenase	-2.55	-2.19	-5.39	-3.05	0	0	0	-2.19	0	0
1014	Cgl1465	-	NADH dehydrogenase	0	-3.73	-3.73	-3.06	F:GO:0003954; C:GO:0016021	F:NADH dehydrogenase activity; C:integral component of membrane	1.3e-09	-3.73	0	0
1015	Cgl2363	rplU	50S ribosomal protein L21	0	-4.81	-4.76	-3.06	P:GO:0006412; F:GO:0003735; F:GO:0019843; C:GO:0005840	P:translation; F:structural constituent of ribosome; F:rRNA binding; C:ribosome	0	-4.81	0	0
1016	Cgl2889	psp5	N-acetylmuramoyl-L-alanine amidase	0	-3.16	-3.3	-3.07	P:GO:0009253; F:GO:0008270; F:GO:0008745	P:peptidoglycan catabolic process; F:zinc ion binding; F:N-acetylmuramoyl-L-alanine amidase activity	0	-3.16	0	0
1017	Cgl1030	-	sodium-dependent transporter	0	-2.89	-2.66	-3.08	P:GO:0055085; F:GO:0015293; C:GO:0016021	P:transmembrane transport; F:symporter activity; C:integral component of membrane	0	-2.89	0	0
1018	Cgl1290	-	2-hydroxyhepta-2,4-diene-1,7-dioate isomerase	0	-2.27	-2.43	-3.08	F:GO:0016787; F:GO:0016853	F:hydrolase activity; F:isomerase activity	1.5e-10	-2.27	0	0
1019	Cgl2411	clpP2	ATP-dependent Clp protease proteolytic subunit	0	-4.1	-4.51	-3.08	P:GO:0006508; F:GO:0004176; F:GO:0004252; C:GO:0005737	P:proteolysis; F:ATP-dependent peptidase activity; F:serine-type endopeptidase activity; C:cytoplasm	0	-4.1	0	0
1020	Cgl2516	-	CAP domain-containing protein	0	0	0	-3.08	0	0	0.5	-0.23	0.78	2.5e-11
1021	Cgl0513	rplV	50S ribosomal protein L22	0	-5.98	-5.86	-3.09	P:GO:0006412; F:GO:0003735; F:GO:0019843; C:GO:0015934	P:translation; F:structural constituent of ribosome; F:rRNA binding; C:large ribosomal subunit	0	-5.98	0	0
1022	Cgl1135	-	hypothetical protein CGBL_0112190	0	-3.52	-3.26	-3.09	0	0	3.9e-12	-3.52	0	0
1023	Cgl1245	-	amino acid-binding ACT domain protein	0	0	0	-3.09	0	0	7.7e-14	-1.76	2.4e-15	0
1024	Cgl2946	-	putative membrane protein	0	-3.8	-6.86	-3.09	F:GO:0016491; C:GO:0016021	F:oxidoreductase activity; C:integral component of membrane	0	-3.76	0	0
1025	Cgl0725	-	ABC transporter permease	0	0	0	-3.1	P:GO:0055085; C:GO:0005886; C:GO:0016021	P:transmembrane transport; C:plasma membrane; C:integral component of membrane	2.9e-18	-1.93	0	0
1026	Cgl1908	-	MULTISPECIES: DUF4193 domain-containing protein	-2.53	-2.66	-2.96	-3.1	0	0	0	-2.66	0	0
1027	Cgl1322	-	DUF3515 domain-containing protein	0	0	0	-3.12	C:GO:0016021	C:integral component of membrane	0.57	0.23	0.31	6.5e-08
1028	Cgl1659	secN	preprotein translocase subunit YajC	0	0	0	-3.12	C:GO:0005886; C:GO:0016021	C:plasma membrane; C:integral component of membrane	1.3e-06	-0.72	0.16	7.5e-15
1029	Cgl2191	qcrC	cytochrome C1	-2.02	-4.35	-5.17	-3.12	P:GO:0022900; F:GO:0005506; F:GO:0009055; F:GO:0020037; C:GO:0005886; C:GO:0016021; C:GO:0070469	P:electron transport chain; F:iron ion binding; F:electron transfer activity; F:heme binding; C:plasma membrane; C:integral component of membrane; C:respirasome	0	-4.35	0	0
1030	Cgl1538	-	C40 family peptidase	0	0	0	-3.13	F:GO:0016787	F:hydrolase activity	7e-10	-1.7	1e-09	0
1031	Cgl1991	-	ABC transporter permease	-2.36	-2.34	-2.29	-3.13	P:GO:0055085; C:GO:0005886; C:GO:0016021	P:transmembrane transport; C:plasma membrane; C:integral component of membrane	0	-2.34	0	0
1032	Cgl0014	-	MULTISPECIES: DUF3566 domain-containing protein	0	0	-2.39	-3.14	C:GO:0016021	C:integral component of membrane	7e-09	-1.82	0	0
1033	Cgl1664	tesB2	acyl-CoA thioesterase	0	0	-2.06	-3.14	P:GO:0006637; F:GO:0047617	P:acyl-CoA metabolic process; F:acyl-CoA hydrolase activity	1.5e-12	-1.97	7.8e-15	0
1034	Cgl1120	sigE	RNA polymerase sigma factor SigE	0	-2.83	-3.01	-3.15	P:GO:2000142; F:GO:0003677; F:GO:0003899; F:GO:0016987	P:regulation of DNA-templated transcription, initiation; F:DNA binding; F:DNA-directed 5'-3' RNA polymerase activity; F:sigma factor activity	0	-2.83	0	0
1035	Cgl1620	pepQ	Xaa-Pro aminopeptidase	0	0	0	-3.15	P:GO:0006508; F:GO:0004177; F:GO:0046872	P:proteolysis; F:aminopeptidase activity; F:metal ion binding	9.5e-21	-1.55	3.2e-15	0
1036	Cgl2023	frr	ribosome recycling factor	0	-4.58	-4.6	-3.15	P:GO:0006415; C:GO:0005737	P:translational termination; C:cytoplasm	0	-4.58	0	0
1037	Cgl0724	-	carbohydrate ABC transporter permease	0	-2.18	-2.1	-3.16	P:GO:0055085; C:GO:0005886; C:GO:0016021	P:transmembrane transport; C:plasma membrane; C:integral component of membrane	0	-2.18	0	0
1038	Cgl1334	-	DUF368 domain-containing protein	0	-2.8	-2.65	-3.16	C:GO:0016021	C:integral component of membrane	3.5e-10	-2.8	0	0
1039	Cgl1974	-	putative secreted protein	0	0	0	-3.16	F:GO:0008745	F:N-acetylmuramoyl-L-alanine amidase activity	0.00042	-1.62	1.7e-07	0
1040	Cgl0882	galU1	UDP-glucose pyrophosphorylase	0	0	0	-3.17	P:GO:0006011; P:GO:0009058; F:GO:0003983	P:UDP-glucose metabolic process; P:biosynthetic process; F:UTP:glucose-1-phosphate uridylyltransferase activity	0.00014	-1.18	2.8e-05	0
1041	Cgl2881	-	phosphatase PAP2 family protein	0	0	0	-3.17	0	0	8.3e-18	-1.84	1e-14	0
1042	Cgl1370	uspA1	stress protein	-2.47	-4.84	-5.09	-3.18	0	0	0	-4.84	0	0
1043	Cgl2981	rplI	50S ribosomal protein L9	0	-4.92	-4.81	-3.19	P:GO:0006412; F:GO:0003735; F:GO:0019843; C:GO:0005840	P:translation; F:structural constituent of ribosome; F:rRNA binding; C:ribosome	0	-4.92	0	0
1044	Cgl0009	-	MULTISPECIES: hypothetical protein	-2.19	-2.16	-2.15	-3.2	0	0	0	-2.16	0	0
1045	Cgl0422	qsuB	4-hydroxyphenylpyruvate dioxygenase	0	0	0	-3.2	P:GO:0046279; F:GO:0003868; F:GO:0016853; F:GO:0046565	P:3,4-dihydroxybenzoate biosynthetic process; F:4-hydroxyphenylpyruvate dioxygenase activity; F:isomerase activity; F:3-dehydroshikimate dehydratase activity	0.0016	-0.92	0.0019	0
1046	Cgl2021	-	DUF1049 domain-containing protein	0	-3.53	-3.42	-3.22	C:GO:0005887	C:integral component of plasma membrane	0	-3.53	0	0
1047	Cgl2705	-	DUF2617 family protein	0	0	0	-3.24	0	0	0.0039	-1.16	1.4e-07	0
1048	Cgl0071	-	putative membrane protein	-2.05	-3.7	-3.33	-3.25	C:GO:0016021	C:integral component of membrane	0	-3.7	0	0
1049	Cgl0131	-	permease	0	0	0	-3.26	C:GO:0005886; C:GO:0016021	C:plasma membrane; C:integral component of membrane	0.0052	0.81	2.3e-06	2.8e-06
1050	Cgl0597	groES	co-chaperonin GroES	-3.54	-5.05	-5.93	-3.27	P:GO:0006457; F:GO:0005524; C:GO:0005737	P:protein folding; F:ATP binding; C:cytoplasm	0	-5.05	0	0
1051	Cgl2076	-	MULTISPECIES: DivIVA domain-containing protein	0	-2.22	-2.14	-3.27	0	0	0	-2.22	0	0
1052	Cgl0256	-	putative secreted protein	0	-3.66	-3.68	-3.28	0	0	0	-3.66	0	0
1053	Cgl0411	-	putative DNA-binding protein Rv0500A	0	-2.99	-4.49	-3.29	F:GO:0003677	F:DNA binding	2.8e-11	-2.99	0	0
1054	Cgl0495	fusA	elongation factor G	0	-4.46	-5.54	-3.29	P:GO:0006414; F:GO:0003746; F:GO:0003924; F:GO:0005525; C:GO:0005737	P:translational elongation; F:translation elongation factor activity; F:GTPase activity; F:GTP binding; C:cytoplasm	0	-4.46	0	0
1055	Cgl0496	-	elongation factor G	0	-4.45	-5.51	-3.3	P:GO:0006414; F:GO:0003746; F:GO:0003924; F:GO:0005525; C:GO:0005737	P:translational elongation; F:translation elongation factor activity; F:GTPase activity; F:GTP binding; C:cytoplasm	0	-4.45	0	0
1056	Cgl0892	betP	glycine/betaine ABC transporter	0	-3.76	-3.6	-3.3	P:GO:0055085; P:GO:0071705; F:GO:0015293; F:GO:0042802; F:GO:0046872; C:GO:0005886; C:GO:0016021	P:transmembrane transport; P:nitrogen compound transport; F:symporter activity; F:identical protein binding; F:metal ion binding; C:plasma membrane; C:integral component of membrane	0	-3.76	0	0
1057	Cgl0512	-	30S ribosomal protein S19	0	-5.94	-5.99	-3.31	P:GO:0006412; F:GO:0003735; F:GO:0019843; C:GO:0015935	P:translation; F:structural constituent of ribosome; F:rRNA binding; C:small ribosomal subunit	0	-5.94	0	0
1058	Cgl1291	-	SAM-dependent methyltransferase	0	0	0	-3.31	P:GO:0032259; F:GO:0008689	P:methylation; F:3-demethylubiquinone-9 3-O-methyltransferase activity	5.7e-13	-1.8	1.2e-15	0
1059	Cgl1910	ppgK	polyphosphate glucokinase	-2.22	-2.74	-2.67	-3.31	P:GO:0016310; F:GO:0047330	P:phosphorylation; F:polyphosphate-glucose phosphotransferase activity	0	-2.74	0	0
1060	Cgl1936	ptsF	PTS lactose transporter subunit IIC	0	-2.3	-2.93	-3.31	P:GO:0009401; P:GO:0015755; P:GO:1902600; F:GO:0005351; F:GO:0022877; C:GO:0005886; C:GO:0016021	P:phosphoenolpyruvate-dependent sugar phosphotransferase system; P:fructose transmembrane transport; P:proton transmembrane transport; F:carbohydrate:proton symporter activity; F:protein-N(PI)-phosphohistidine-fructose phosphotransferase system transporter activity; C:plasma membrane; C:integral component of membrane	0	-2.3	0	0
1061	Cgl2426	pepN	aminopeptidase N	0	-2.28	-2.23	-3.31	P:GO:0006508; F:GO:0004177; F:GO:0008237; F:GO:0008270	P:proteolysis; F:aminopeptidase activity; F:metallopeptidase activity; F:zinc ion binding	9.4e-13	-2.28	0	0
1062	Cgl0566	rplQ	50S ribosomal protein L17	0	-4.77	-5.04	-3.32	P:GO:0006412; F:GO:0003735; C:GO:0005840	P:translation; F:structural constituent of ribosome; C:ribosome	0	-4.77	0	0
1063	Cgl1102	fdxC	ferredoxin	0	-3.97	-3.66	-3.32	P:GO:0022900; F:GO:0009055; F:GO:0046872; F:GO:0051538; F:GO:0051539	P:electron transport chain; F:electron transfer activity; F:metal ion binding; F:3 iron, 4 sulfur cluster binding; F:4 iron, 4 sulfur cluster binding	0	-3.97	0	0
1064	Cgl2588	purL	phosphoribosylformylglycinamidine synthase subunit PurL	0	-3.14	-3.39	-3.32	P:GO:0006189; F:GO:0000287; F:GO:0004642; F:GO:0005524; C:GO:0005737	P:'de novo' IMP biosynthetic process; F:magnesium ion binding; F:phosphoribosylformylglycinamidine synthase activity; F:ATP binding; C:cytoplasm	1.1e-11	-3.14	0	0
1065	Cgl2591	gpx	glutathione peroxidase	0	0	0	-3.32	P:GO:0006979; P:GO:0098869; F:GO:0004602	P:response to oxidative stress; P:cellular oxidant detoxification; F:glutathione peroxidase activity	2.3e-15	-1.74	2.2e-15	0
1066	Cgl1528	-	methylmalonyl Co-A mutase-associated GTPase MeaB	0	0	-2.01	-3.34	P:GO:0016310; F:GO:0003924; F:GO:0005525; F:GO:0016301	P:phosphorylation; F:GTPase activity; F:GTP binding; F:kinase activity	1.2e-18	-1.71	0	0
1067	Cgl1400	argG	argininosuccinate synthase	0	-3.97	-3.97	-3.35	P:GO:0006526; F:GO:0004055; F:GO:0005524; C:GO:0005737	P:arginine biosynthetic process; F:argininosuccinate synthase activity; F:ATP binding; C:cytoplasm	0	-3.97	0	0
1068	Cgl0508	rplW	50S ribosomal protein L23	0	-5.91	-5.09	-3.37	P:GO:0006412; F:GO:0003735; F:GO:0019843; C:GO:0005840	P:translation; F:structural constituent of ribosome; F:rRNA binding; C:ribosome	0	-5.91	0	0
1069	Cgl0509	-	50S ribosomal protein L23	0	-5.91	-5.11	-3.37	P:GO:0006412; F:GO:0003735; F:GO:0019843; C:GO:0005840	P:translation; F:structural constituent of ribosome; F:rRNA binding; C:ribosome	0	-5.91	0	0
1070	Cgl2796	ald	aldehyde dehydrogenase	-4.73	-4.9	-4.76	-3.37	F:GO:0004029; F:GO:0043878	F:aldehyde dehydrogenase (NAD+) activity; F:glyceraldehyde-3-phosphate dehydrogenase (NAD+) (non-phosphorylating) activity	0	-4.9	0	0
1071	Cgl0136	-	DUF885 family protein	0	0	0	-3.38	0	0	5.8e-12	-1.78	0	0
1072	Cgl2054	rpsP	30S ribosomal protein S16	-2.05	-3.78	-4.48	-3.38	P:GO:0006412; F:GO:0003735; C:GO:0005840	P:translation; F:structural constituent of ribosome; C:ribosome	0	-3.78	0	0
1073	Cgl0828	serC	phosphoserine aminotransferase	0	-3.42	-3.46	-3.39	P:GO:0006564; P:GO:0008615; F:GO:0004648; F:GO:0030170; C:GO:0005737	P:L-serine biosynthetic process; P:pyridoxine biosynthetic process; F:O-phospho-L-serine:2-oxoglutarate aminotransferase activity; F:pyridoxal phosphate binding; C:cytoplasm	0.003	-3.42	0	0
1074	Cgl1398	argF	ornithine carbamoyltransferase	0	-3.03	-3.05	-3.39	P:GO:0006526; P:GO:0006591; F:GO:0004585; F:GO:0016597; C:GO:0005737	P:arginine biosynthetic process; P:ornithine metabolic process; F:ornithine carbamoyltransferase activity; F:amino acid binding; C:cytoplasm	0	-3.03	0	0
1075	Cgl2872	fadD2	acyl-CoA synthase	0	-2.68	-2.8	-3.39	F:GO:0016874	F:ligase activity	0	-2.68	0	0
1076	Cgl0237	-	3,4-dioxygenase subunit beta	0	-2.06	0	-3.4	P:GO:0006725; F:GO:0008199; F:GO:0016702	P:cellular aromatic compound metabolic process; F:ferric iron binding; F:oxidoreductase activity, acting on single donors with incorporation of molecular oxygen, incorporation of two atoms of oxygen	0.00049	-2.06	1.2e-13	0
1077	Cgl0708	dtsR1	methylmalonyl-CoA carboxyltransferase	0	-2.94	-3.03	-3.4	F:GO:0004658; F:GO:0016740; C:GO:0016021	F:propionyl-CoA carboxylase activity; F:transferase activity; C:integral component of membrane	0	-2.94	0	0
1078	Cgl1397	argD	acetylornithine aminotransferase	0	-3.06	-3.08	-3.4	P:GO:0006526; F:GO:0003992; F:GO:0030170; C:GO:0005737	P:arginine biosynthetic process; F:N2-acetyl-L-ornithine:2-oxoglutarate 5-aminotransferase activity; F:pyridoxal phosphate binding; C:cytoplasm	0	-3.06	0	0
1079	Cgl2412	clpP1	ATP-dependent Clp protease proteolytic subunit	0	-4.2	-4.56	-3.4	P:GO:0006508; F:GO:0004176; F:GO:0004252; C:GO:0005737	P:proteolysis; F:ATP-dependent peptidase activity; F:serine-type endopeptidase activity; C:cytoplasm	0	-4.2	0	0
1080	Cgl2880	-	phosphoribose diphosphate:decaprenyl-phosphate phosphoribosyltransferase	0	-2.17	-2.58	-3.4	P:GO:0045227; P:GO:0071555; F:GO:0016757; F:GO:0016765; C:GO:0016021	P:capsule polysaccharide biosynthetic process; P:cell wall organization; F:transferase activity, transferring glycosyl groups; F:transferase activity, transferring alkyl or aryl (other than methyl) groups; C:integral component of membrane	2.4e-10	-2.17	0	0
1081	Cgl2988	-	transcriptional regulator	-2.44	-3.04	-3.32	-3.4	P:GO:0006355; F:GO:0003700	P:regulation of transcription, DNA-templated; F:DNA-binding transcription factor activity	0	-3.04	0	0
1082	Cgl0869	rpmB	50S ribosomal protein L28	0	-5.05	-5.54	-3.41	P:GO:0006412; F:GO:0003735; C:GO:0005840	P:translation; F:structural constituent of ribosome; C:ribosome	0	-5.05	0	0
1083	Cgl2540	pknE	DsbA family protein	0	-3.09	-3.23	-3.41	C:GO:0016021	C:integral component of membrane	0	-3.09	0	0
1084	Cgl0868	rpmG	50S ribosomal protein L33	0	-5.49	-5.39	-3.42	P:GO:0006412; F:GO:0003735; C:GO:0005840	P:translation; F:structural constituent of ribosome; C:ribosome	0	-5.49	0	0
1085	Cgl0878	-	hypothetical protein	-2.37	-3.97	-4.29	-3.43	0	0	0	-3.97	0	0
1086	Cgl1946	-	DUF349 domain-containing protein	0	0	0	-3.43	C:GO:0016021	C:integral component of membrane	3.1e-08	-1.74	6.1e-11	0
1087	Cgl0034	ppiA	peptidylprolyl isomerase	-2.54	-4.91	-4.91	-3.44	P:GO:0000413; P:GO:0006457; F:GO:0003755	P:protein peptidyl-prolyl isomerization; P:protein folding; F:peptidyl-prolyl cis-trans isomerase activity	0	-4.91	0	0
1088	Cgl0538	rplF	50S ribosomal protein L6	-2.05	-5.84	-5.98	-3.44	P:GO:0006412; F:GO:0003735; F:GO:0019843; C:GO:0005840	P:translation; F:structural constituent of ribosome; F:rRNA binding; C:ribosome	0	-5.84	0	0
1089	Cgl1663	-	YebC/PmpR family DNA-binding transcriptional regulator	-2.13	-4.34	-4.97	-3.44	P:GO:0006355; F:GO:0003677; C:GO:0005737	P:regulation of transcription, DNA-templated; F:DNA binding; C:cytoplasm	0	-4.34	0	0
1090	Cgl2489	bcp	thioredoxin-dependent thiol peroxidase	-2.14	-3.64	-3.29	-3.44	P:GO:0098869; F:GO:0004601; F:GO:0051920	P:cellular oxidant detoxification; F:peroxidase activity; F:peroxiredoxin activity	0	-3.64	0	0
1091	Cgl2730	mrpC	monovalent cation/H+ antiporter subunit C	-2.05	-2.26	-2.68	-3.44	C:GO:0016021	C:integral component of membrane	0	-2.26	0	0
1092	Cgl0511	rpsS	30S ribosomal protein S19	0	-6.03	-6.07	-3.45	P:GO:0006412; F:GO:0003735; F:GO:0019843; C:GO:0015935	P:translation; F:structural constituent of ribosome; F:rRNA binding; C:small ribosomal subunit	0	-6.03	0	0
1093	Cgl0947	-	ABC transporter permease	0	-4.3	-4.99	-3.45	C:GO:0016021	C:integral component of membrane	0	-4.3	0	0
1094	Cgl2004	-	putative secreted or membrane protein	-2.88	-5.83	-4.76	-3.45	C:GO:0016021	C:integral component of membrane	0	-5.83	0	0
1095	Cgl2818	cysJ	pyridine nucleotide-disulfide oxidoreductase	0	-3.04	-2.98	-3.46	F:GO:0004324	F:ferredoxin-NADP+ reductase activity	3.2e-07	-3.04	0	0
1096	Cgl0101	-	AbgT family transporter	-2.89	-5.17	-5.31	-3.47	P:GO:1902604; F:GO:0015558; C:GO:0016021	P:p-aminobenzoyl-glutamate transmembrane transport; F:secondary active p-aminobenzoyl-glutamate transmembrane transporter activity; C:integral component of membrane	0	-5.17	0	0
1097	Cgl0252	asd	aspartate-semialdehyde dehydrogenase	0	-3.96	-3.83	-3.47	P:GO:0009088; P:GO:0009089; P:GO:0009097; P:GO:0019877; P:GO:0071266; F:GO:0004073; F:GO:0046983; F:GO:0050661; F:GO:0051287	P:threonine biosynthetic process; P:lysine biosynthetic process via diaminopimelate; P:isoleucine biosynthetic process; P:diaminopimelate biosynthetic process; P:'de novo' L-methionine biosynthetic process; F:aspartate-semialdehyde dehydrogenase activity; F:protein dimerization activity; F:NADP binding; F:NAD binding	0	-3.96	0	0
1098	Cgl1522	-	Hypothetical membrane protein	-2.59	-2.7	-2.94	-3.47	C:GO:0016021	C:integral component of membrane	0	-2.7	0	0
1099	Cgl0281	-	MULTISPECIES: DUF4177 domain-containing protein	-2.96	-3.49	-3.69	-3.48	0	0	0	-3.49	0	0
1100	Cgl1539	-	membrane protein	0	0	0	-3.48	C:GO:0016021	C:integral component of membrane	0.15	-0.71	0.63	2e-11
1101	Cgl0872	rpmE	50S ribosomal protein L31 type B	0	-4.41	-5.28	-3.49	P:GO:0006412; F:GO:0003735; C:GO:0005840	P:translation; F:structural constituent of ribosome; C:ribosome	0	-4.41	0	0
1102	Cgl2732	mrpE	Na+/H+ antiporter subunit E	0	0	0	-3.52	P:GO:0098655; F:GO:0008324; C:GO:0005886; C:GO:0016021	P:cation transmembrane transport; F:cation transmembrane transporter activity; C:plasma membrane; C:integral component of membrane	0.017	-0.98	3.5e-06	0
1103	Cgl2116	-	DNA polymerase III subunit epsilon	0	0	0	-3.53	P:GO:0071897; P:GO:0090305; F:GO:0003676; F:GO:0003887; F:GO:0004527	P:DNA biosynthetic process; P:nucleic acid phosphodiester bond hydrolysis; F:nucleic acid binding; F:DNA-directed DNA polymerase activity; F:exonuclease activity	1	-0.35	1	1.9e-10
1104	Cgl0537	rpsH	30S ribosomal protein S8	-2.65	-5.4	-5.82	-3.55	P:GO:0006412; F:GO:0003735; F:GO:0019843; C:GO:0005840	P:translation; F:structural constituent of ribosome; F:rRNA binding; C:ribosome	0	-5.4	0	0
1105	Cgl1139	metE	5-methyltetrahydropteroyltriglutamate--homocysteine S-methyltransferase	-2.73	-5.35	-5.38	-3.55	P:GO:0009086; P:GO:0032259; F:GO:0003871; F:GO:0008270	P:methionine biosynthetic process; P:methylation; F:5-methyltetrahydropteroyltriglutamate-homocysteine S-methyltransferase activity; F:zinc ion binding	0	-5.35	0	0
1106	Cgl2255	acpM	acyl carrier protein	-3.14	-3.46	-3.38	-3.56	P:GO:0006633; F:GO:0000036; C:GO:0005737	P:fatty acid biosynthetic process; F:acyl carrier activity; C:cytoplasm	0	-3.46	0	0
1107	Cgl1005	-	divalent metal cation transporter	0	0	-2.1	-3.57	P:GO:0030001; F:GO:0046873; C:GO:0016021	P:metal ion transport; F:metal ion transmembrane transporter activity; C:integral component of membrane	2.7e-16	-1.98	0	0
1108	Cgl2246	-	DUF3052 domain-containing protein	-2.15	-2.67	-2.82	-3.57	0	0	0	-2.67	0	0
1109	Cgl0786	-	UPF0182 family protein	0	-3.97	-4.03	-3.59	C:GO:0005886; C:GO:0016021	C:plasma membrane; C:integral component of membrane	0	-3.97	0	0
1110	Cgl0986	greA	transcription elongation factor GreA	-2.37	-3.88	-3.12	-3.59	P:GO:0006414; P:GO:0032784; F:GO:0003677; F:GO:0003746; F:GO:0070063	P:translational elongation; P:regulation of DNA-templated transcription, elongation; F:DNA binding; F:translation elongation factor activity; F:RNA polymerase binding	0	-3.88	0	0
1111	Cgl1935	pfkB	1-phosphofructokinase family hexose kinase	0	0	-2.4	-3.59	P:GO:0046835; F:GO:0008662	P:carbohydrate phosphorylation; F:1-phosphofructokinase activity	0	-1.63	0	0
1112	Cgl2882	-	glycosyl transferase	0	0	-2.07	-3.6	F:GO:0016740	F:transferase activity	3e-09	-1.93	0	0
1113	Cgl3097	-	membrane protein insertase YidC	0	-3.6	-3.74	-3.6	P:GO:0015031; P:GO:0090150; F:GO:0032977; C:GO:0016021	P:protein transport; P:establishment of protein localization to membrane; F:membrane insertase activity; C:integral component of membrane	0	-3.6	0	0
1114	Cgl2458	-	putative membrane protein	-2.4	0	0	-3.62	C:GO:0016021	C:integral component of membrane	0	-1.71	2.2e-12	0
1115	Cgl2525	nrdF	ribonucleotide-diphosphate reductase subunit beta	0	-4.48	-4.31	-3.63	P:GO:0006260; P:GO:0009263; F:GO:0004748; F:GO:0046872; C:GO:0005971	P:DNA replication; P:deoxyribonucleotide biosynthetic process; F:ribonucleoside-diphosphate reductase activity, thioredoxin disulfide as acceptor; F:metal ion binding; C:ribonucleoside-diphosphate reductase complex	0	-4.48	0	0
1116	Cgl2074	rnc	ribonuclease III	0	0	0	-3.65	P:GO:0006364; P:GO:0006397; P:GO:0008033; P:GO:0016075; P:GO:0090502; F:GO:0004525; F:GO:0019843; F:GO:0046872; C:GO:0005737	P:rRNA processing; P:mRNA processing; P:tRNA processing; P:rRNA catabolic process; P:RNA phosphodiester bond hydrolysis, endonucleolytic; F:ribonuclease III activity; F:rRNA binding; F:metal ion binding; C:cytoplasm	5.6e-07	-1.69	7.1e-14	0
1117	Cgl2718	-	MULTISPECIES: hypothetical protein	0	0	0	-3.65	0	0	0.063	-1.17	0.003	0
1118	Cgl1474	-	putative secreted protein	0	-2.73	-2.63	-3.68	0	0	0	-2.73	0	0
1119	Cgl0835	-	Tat pathway signal sequence domain protein	0	-3.1	-2.93	-3.71	0	0	0	-3.1	0	0
1120	Cgl3050	-	Hypothetical protein	0	-4.27	-3.51	-3.72	C:GO:0016021	C:integral component of membrane	0	-4.27	0	0
1121	Cgl1610	carA	carbamoyl phosphate synthase small subunit	0	-3.25	-3.29	-3.74	P:GO:0006207; P:GO:0006526; P:GO:0006541; P:GO:0044205; F:GO:0004088; F:GO:0005524	P:'de novo' pyrimidine nucleobase biosynthetic process; P:arginine biosynthetic process; P:glutamine metabolic process; P:'de novo' UMP biosynthetic process; F:carbamoyl-phosphate synthase (glutamine-hydrolyzing) activity; F:ATP binding	0	-3.25	0	0
1122	Cgl2370	ndk	multifunctional nucleoside diphosphate kinase/apyrimidinic endonuclease/3'-phosphodiesterase	-2.47	-3.28	-3.44	-3.74	P:GO:0006165; P:GO:0006183; P:GO:0006228; P:GO:0006241; P:GO:0090305; F:GO:0004519; F:GO:0004550; F:GO:0005524; F:GO:0046872; C:GO:0005737	P:nucleoside diphosphate phosphorylation; P:GTP biosynthetic process; P:UTP biosynthetic process; P:CTP biosynthetic process; P:nucleic acid phosphodiester bond hydrolysis; F:endonuclease activity; F:nucleoside diphosphate kinase activity; F:ATP binding; F:metal ion binding; C:cytoplasm	0	-3.28	0	0
1123	Cgl0851	pgi	glucose-6-phosphate isomerase	0	0	-2.22	-3.75	P:GO:0006094; P:GO:0006096; F:GO:0004347; C:GO:0005737	P:gluconeogenesis; P:glycolytic process; F:glucose-6-phosphate isomerase activity; C:cytoplasm	1.7e-06	-1.8	0	0
1124	Cgl0689	pyc	pyruvate carboxylase	0	0	-2.02	-3.76	P:GO:0006090; P:GO:0006094; F:GO:0004736; F:GO:0005524; F:GO:0009374; F:GO:0046872	P:pyruvate metabolic process; P:gluconeogenesis; F:pyruvate carboxylase activity; F:ATP binding; F:biotin binding; F:metal ion binding	1.1e-20	-1.9	0	0
1125	Cgl0879	mscL	large-conductance mechanosensitive channel	0	-2.11	-2.07	-3.76	P:GO:0034220; F:GO:0008381; C:GO:0005887	P:ion transmembrane transport; F:mechanosensitive ion channel activity; C:integral component of plasma membrane	0.00044	-2.11	0	0
1126	Cgl1273	ilvC	ketol-acid reductoisomerase	0	-4.47	-4.81	-3.77	P:GO:0009097; P:GO:0009099; F:GO:0000287; F:GO:0004455; F:GO:0008677; F:GO:0016853; F:GO:0050661	P:isoleucine biosynthetic process; P:valine biosynthetic process; F:magnesium ion binding; F:ketol-acid reductoisomerase activity; F:2-dehydropantoate 2-reductase activity; F:isomerase activity; F:NADP binding	0	-4.47	0	0
1127	Cgl2082	-	DUF4921 family protein	0	0	0	-3.77	P:GO:0033499; F:GO:0008108; F:GO:0008270	P:galactose catabolic process via UDP-galactose; F:UDP-glucose:hexose-1-phosphate uridylyltransferase activity; F:zinc ion binding	0.0013	-1.23	0.0039	0
1128	Cgl2753	pta	phosphate acetyltransferase	-2.22	0	-2.11	-3.77	P:GO:0006085; F:GO:0008959; C:GO:0005737	P:acetyl-CoA biosynthetic process; F:phosphate acetyltransferase activity; C:cytoplasm	0	-1.89	0	0
1129	Cgl0248	leuA	2-isopropylmalate synthase	0	-2.58	-2.56	-3.78	P:GO:0009082; P:GO:0009098; F:GO:0003852	P:branched-chain amino acid biosynthetic process; P:leucine biosynthetic process; F:2-isopropylmalate synthase activity	1.7e-08	-2.58	0	0
1130	Cgl0529	fdhF	FdhF/YdeP family oxidoreductase	0	-2.91	-2.77	-3.78	F:GO:0008863; F:GO:0030151; F:GO:0043546; F:GO:0051539	F:formate dehydrogenase (NAD+) activity; F:molybdenum ion binding; F:molybdopterin cofactor binding; F:4 iron, 4 sulfur cluster binding	1.5e-16	-2.91	0	0
1131	Cgl1606	gmk	guanylate kinase	-3.32	-4.85	-4.51	-3.8	P:GO:0016310; P:GO:0046037; P:GO:0046710; F:GO:0004385; F:GO:0005524; C:GO:0005737	P:phosphorylation; P:GMP metabolic process; P:GDP metabolic process; F:guanylate kinase activity; F:ATP binding; C:cytoplasm	0	-4.85	0	0
1132	Cgl2125	treZ	malto-oligosyltrehalose trehalohydrolase	0	-2.71	-2.65	-3.81	P:GO:0005992; F:GO:0033942; C:GO:0005737	P:trehalose biosynthetic process; F:4-alpha-D-(1->4)-alpha-D-glucanotrehalose trehalohydrolase activity; C:cytoplasm	2.8e-06	-2.71	0	0
1133	Cgl3048	-	Hypothetical protein	-2.02	-3.39	-3.15	-3.82	0	0	0	-3.39	0	0
1134	Cgl0885	-	putative membrane protein	0	-3.1	-2.97	-3.84	C:GO:0016021	C:integral component of membrane	2.1e-05	-3.1	0	0
1135	Cgl2192	ctaE	cytochrome c oxidase subunit 3	0	-4.22	-5.69	-3.86	P:GO:0019646; P:GO:1902600; F:GO:0004129; C:GO:0005886; C:GO:0016021	P:aerobic electron transport chain; P:proton transmembrane transport; F:cytochrome-c oxidase activity; C:plasma membrane; C:integral component of membrane	0	-4.22	0	0
1136	Cgl0562	rpsK	30S ribosomal protein S11	0	-5.38	-5.29	-3.87	P:GO:0006412; F:GO:0003735; F:GO:0019843; C:GO:0005840	P:translation; F:structural constituent of ribosome; F:rRNA binding; C:ribosome	0	-5.38	0	0
1137	Cgl0637	-	methionine ABC transporter substrate-binding protein	0	-3.69	-3.82	-3.9	C:GO:0016020	C:membrane	0	-3.69	0	0
1138	Cgl0516	rpmC	50S ribosomal protein L29	0	-6.19	-5.93	-3.92	P:GO:0006412; F:GO:0003735; C:GO:0005840	P:translation; F:structural constituent of ribosome; C:ribosome	0	-6.19	0	0
1139	Cgl0186	-	glutamate--cysteine ligase	0	0	0	-3.94	P:GO:0042398; F:GO:0004357	P:cellular modified amino acid biosynthetic process; F:glutamate-cysteine ligase activity	0.11	-0.88	4.6e-05	0
1140	Cgl0515	rplP	50S ribosomal protein L16	0	-5.99	-5.84	-3.94	P:GO:0006412; F:GO:0000049; F:GO:0003735; F:GO:0019843; C:GO:0005840	P:translation; F:tRNA binding; F:structural constituent of ribosome; F:rRNA binding; C:ribosome	0	-5.99	0	0
1141	Cgl1272	ilvN	acetolactate synthase 3 regulatory subunit	0	-4.22	-3.88	-3.94	P:GO:0009097; P:GO:0009099; P:GO:0050790; F:GO:0003984; F:GO:1990610	P:isoleucine biosynthetic process; P:valine biosynthetic process; P:regulation of catalytic activity; F:acetolactate synthase activity; F:acetolactate synthase regulator activity	0	-4.22	0	0
1142	Cgl0564	rpoA	DNA-directed RNA polymerase subunit alpha	0	-5.33	-5.27	-3.95	P:GO:0006351; F:GO:0003677; F:GO:0003899; F:GO:0046983	P:transcription, DNA-templated; F:DNA binding; F:DNA-directed 5'-3' RNA polymerase activity; F:protein dimerization activity	0	-5.33	0	0
1143	Cgl2190	qcrA	ubiquinol-cytochrome c reductase iron-sulfur subunit	-2.16	-4.92	-5.5	-3.95	F:GO:0016491; F:GO:0046872; F:GO:0051537; C:GO:0005886; C:GO:0016021; C:GO:0070469	F:oxidoreductase activity; F:metal ion binding; F:2 iron, 2 sulfur cluster binding; C:plasma membrane; C:integral component of membrane; C:respirasome	0	-4.92	0	0
1144	Cgl0396	-	DUF2505 domain-containing protein	0	-3.99	-4.1	-3.96	0	0	0	-3.99	0	0
1145	Cgl1937	ptsH	HPr family phosphocarrier protein	-2.62	0	-5.17	-3.97	0	0	0	-1.71	0	0
1146	Cgl2461	amyE	ABC transporter substrate-binding protein	-4.15	-5.02	-5.28	-3.98	P:GO:0055085	P:transmembrane transport	0	-5.02	0	0
1147	Cgl1441	odhI	AChain A, Oxoglutarate dehydrogenase inhibitor	0	-3.81	-4.66	-4	F:GO:0005515; C:GO:0005737	F:protein binding; C:cytoplasm	0	-3.81	0	0
1148	Cgl1189	narG	nitrate reductase subunit alpha	0	-2.43	-2.48	-4.01	P:GO:0042126; F:GO:0008940; F:GO:0043546; F:GO:0046872; F:GO:0051539; C:GO:0005886; C:GO:0009325	P:nitrate metabolic process; F:nitrate reductase activity; F:molybdopterin cofactor binding; F:metal ion binding; F:4 iron, 4 sulfur cluster binding; C:plasma membrane; C:nitrate reductase complex	5.6e-09	-2.43	0	0
1149	Cgl2888	glf	UDP-galactopyranose mutase	0	-2.54	-2.51	-4.02	F:GO:0008767	F:UDP-galactopyranose mutase activity	1.2e-08	-2.54	0	0
1150	Cgl0539	rplR	50S ribosomal protein L18	0	-6.09	-6.18	-4.04	P:GO:0006412; F:GO:0003735; F:GO:0019843; C:GO:0005840	P:translation; F:structural constituent of ribosome; F:rRNA binding; C:ribosome	0	-6.09	0	0
1151	Cgl1976	rpsO	30S ribosomal protein S15	0	-4.26	-5.94	-4.04	P:GO:0006412; F:GO:0003735; F:GO:0019843; C:GO:0005840	P:translation; F:structural constituent of ribosome; F:rRNA binding; C:ribosome	0	-4.26	0	0
1152	Cgl1513	-	MULTISPECIES: hypothetical protein	-2.51	-4.17	-3.45	-4.05	0	0	0	-4.17	0	0
1153	Cgl2207	aceF	2-oxoglutarate dehydrogenase, E2 component, dihydrolipoamide succinyltransferase	0	-4.7	-4.74	-4.06	P:GO:0006096; P:GO:0006099; F:GO:0004742	P:glycolytic process; P:tricarboxylic acid cycle; F:dihydrolipoyllysine-residue acetyltransferase activity	0	-4.7	0	0
1154	Cgl0819	-	resuscitation-promoting factor Rpf1	-2.21	-5.17	-5.14	-4.07	F:GO:0016787; C:GO:0005576; C:GO:0009986	F:hydrolase activity; C:extracellular region; C:cell surface	0	-5.17	0	0
1155	Cgl1186	narI	Nitrate reductase gamma subunit	0	-3.19	-3.14	-4.08	P:GO:0042128; F:GO:0008940; F:GO:0046872; C:GO:0005886; C:GO:0009325; C:GO:0016021	P:nitrate assimilation; F:nitrate reductase activity; F:metal ion binding; C:plasma membrane; C:nitrate reductase complex; C:integral component of membrane	0	-3.19	0	0
1156	Cgl1178	-	alpha/beta hydrolase	-2.05	-2.66	-2.62	-4.1	F:GO:0016746; F:GO:0016787	F:transferase activity, transferring acyl groups; F:hydrolase activity	0	-2.66	0	0
1157	Cgl2081	-	Hypothetical protein	0	-3.23	-3.31	-4.12	0	0	0	-3.23	0	0
1158	Cgl0836	fas-IB	type I polyketide synthase	0	-2.96	-3.11	-4.16	P:GO:0006633; F:GO:0004315; F:GO:0004318; F:GO:0016787; C:GO:0005835	P:fatty acid biosynthetic process; F:3-oxoacyl-[acyl-carrier-protein] synthase activity; F:enoyl-[acyl-carrier-protein] reductase (NADH) activity; F:hydrolase activity; C:fatty acid synthase complex	0	-2.96	0	0
1159	Cgl3027	-	dicarboxylate/amino acid:cation symporter	0	-2.82	-3.13	-4.16	P:GO:0055085; F:GO:0015293; C:GO:0016021	P:transmembrane transport; F:symporter activity; C:integral component of membrane	3.6e-09	-2.82	0	0
1160	Cgl1523	-	phospholipid-binding protein	-2.76	-3.65	-3.76	-4.17	0	0	0	-3.65	0	0
1161	Cgl1977	-	nucleoside hydrolase	0	-2.45	-2.5	-4.17	P:GO:0008152; F:GO:0008477	P:metabolic process; F:purine nucleosidase activity	4.8e-10	-2.45	0	0
1162	Cgl2530	nrdE	ribonucleotide-diphosphate reductase subunit alpha	0	-2.5	-2.53	-4.17	P:GO:0006260; F:GO:0004748; F:GO:0005524	P:DNA replication; F:ribonucleoside-diphosphate reductase activity, thioredoxin disulfide as acceptor; F:ATP binding	0.0029	-2.5	0	0
1163	Cgl2948	-	NYN domain-containing protein	0	-2.87	-3.04	-4.18	0	0	0	-2.87	0	0
1164	Cgl1206	atpB	F0F1 ATP synthase subunit A	-2.07	-4.73	-6.34	-4.19	P:GO:0015986; F:GO:0016787; F:GO:0046933; C:GO:0005886; C:GO:0016021; C:GO:0045263	P:ATP synthesis coupled proton transport; F:hydrolase activity; F:proton-transporting ATP synthase activity, rotational mechanism; C:plasma membrane; C:integral component of membrane; C:proton-transporting ATP synthase complex, coupling factor F(o)	0	-4.73	0	0
1165	Cgl0102	-	peptidase M20	-3.36	-4.6	-4.65	-4.24	P:GO:0006508; F:GO:0004180	P:proteolysis; F:carboxypeptidase activity	0	-4.6	0	0
1166	Cgl0653	metY	cystathionine gamma-synthase	0	-3.72	-3.66	-4.25	P:GO:0019346; P:GO:0071266; F:GO:0003961; F:GO:0030170	P:transsulfuration; P:'de novo' L-methionine biosynthetic process; F:O-acetylhomoserine aminocarboxypropyltransferase activity; F:pyridoxal phosphate binding	0	-3.72	0	0
1167	Cgl1210	atpA	F0F1 ATP synthase subunit alpha	0	-4.82	-5.08	-4.25	P:GO:0015986; F:GO:0005524; F:GO:0016787; F:GO:0046933; F:GO:0046961; C:GO:0005886; C:GO:0045261	P:ATP synthesis coupled proton transport; F:ATP binding; F:hydrolase activity; F:proton-transporting ATP synthase activity, rotational mechanism; F:proton-transporting ATPase activity, rotational mechanism; C:plasma membrane; C:proton-transporting ATP synthase complex, catalytic core F(1)	0	-4.82	0	0
1168	Cgl2414	tig	trigger factor	0	-4.05	-3.94	-4.25	P:GO:0000413; P:GO:0006457; P:GO:0007049; P:GO:0015031; P:GO:0051301; F:GO:0003755; C:GO:0005737	P:protein peptidyl-prolyl isomerization; P:protein folding; P:cell cycle; P:protein transport; P:cell division; F:peptidyl-prolyl cis-trans isomerase activity; C:cytoplasm	0	-4.05	0	0
1169	Cgl0829	gltA	citrate synthase	0	-5.01	-5.06	-4.26	P:GO:0006099; F:GO:0004108; C:GO:0005737	P:tricarboxylic acid cycle; F:citrate (Si)-synthase activity; C:cytoplasm	0	-5.01	0	0
1170	Cgl2987	-	DUF5318 family protein	0	0	0	-4.26	0	0	0.095	-1.54	6.5e-05	0
1171	Cgl0563	rpsD	30S ribosomal protein S4	0	-6.22	-5.24	-4.3	P:GO:0006412; F:GO:0003735; F:GO:0019843; C:GO:0015935	P:translation; F:structural constituent of ribosome; F:rRNA binding; C:small ribosomal subunit	0	-6.22	0	0
1172	Cgl2553	-	ABC transporter ATP-binding protein	-2.15	-3.96	-3.77	-4.3	F:GO:0005524	F:ATP binding	0	-3.96	0	0
1173	Cgl1950	gluA	glutamate ABC transporter ATP-binding protein	-3.68	-4.72	-4.53	-4.32	P:GO:0003333; F:GO:0005524; F:GO:0015424; F:GO:0016887; C:GO:0005886	P:amino acid transmembrane transport; F:ATP binding; F:ATPase-coupled amino acid transmembrane transporter activity; F:ATPase activity; C:plasma membrane	0	-4.72	0	0
1174	Cgl2589	purQ	phosphoribosylformylglycinamidine synthase I	0	-3.79	-3.91	-4.32	P:GO:0006189; P:GO:0006541; F:GO:0004359; F:GO:0004642; F:GO:0005524; F:GO:0016740; C:GO:0005737	P:'de novo' IMP biosynthetic process; P:glutamine metabolic process; F:glutaminase activity; F:phosphoribosylformylglycinamidine synthase activity; F:ATP binding; F:transferase activity; C:cytoplasm	0	-3.79	0	0
1175	Cgl1396	argB	acetylglutamate kinase	-2.32	-3.76	-3.59	-4.38	P:GO:0016310; P:GO:0042450; F:GO:0003991; F:GO:0005524; C:GO:0005737	P:phosphorylation; P:arginine biosynthetic process via ornithine; F:acetylglutamate kinase activity; F:ATP binding; C:cytoplasm	0	-3.76	0	0
1176	Cgl1308	glgP1	glycogen phosphorylase	0	-5.16	-5.23	-4.41	P:GO:0005975; F:GO:0008184; F:GO:0030170; F:GO:0102250; F:GO:0102499	P:carbohydrate metabolic process; F:glycogen phosphorylase activity; F:pyridoxal phosphate binding; F:linear malto-oligosaccharide phosphorylase activity; F:SHG alpha-glucan phosphorylase activity	0	-5.16	0	0
1177	Cgl0251	lysC	aspartate kinase	0	-3.74	-3.87	-4.42	P:GO:0009088; P:GO:0009089; P:GO:0016310; P:GO:0019877; F:GO:0004072; F:GO:0005524	P:threonine biosynthetic process; P:lysine biosynthetic process via diaminopimelate; P:phosphorylation; P:diaminopimelate biosynthetic process; F:aspartate kinase activity; F:ATP binding	0	-3.74	0	0
1178	Cgl1965	-	YciI family protein	-2.73	-3.72	-3.85	-4.42	0	0	0	-3.72	0	0
1179	Cgl2248	aceE	pyruvate dehydrogenase (acetyl-transferring), homodimeric type	0	-4.05	-5.05	-4.43	P:GO:0006096; F:GO:0004739; F:GO:0046872	P:glycolytic process; F:pyruvate dehydrogenase (acetyl-transferring) activity; F:metal ion binding	0.84	-4.05	0	0
1180	Cgl0971	porC	putative secreted protein	-2.5	-3.55	-3.66	-4.44	0	0	0	-3.55	0	0
1181	Cgl1345	-	putative secreted protein	-3.75	-4.93	-5.37	-4.47	0	0	0	-4.93	0	0
1182	Cgl2679	guaB1	inosine-5-monophosphate dehydrogenase	0	-2.08	-2.15	-4.53	P:GO:0006164; F:GO:0003938	P:purine nucleotide biosynthetic process; F:IMP dehydrogenase activity	0.0073	-2.08	0	0
1183	Cgl2024	pyrH	uridylate kinase	0	-4.37	-4.36	-4.54	P:GO:0016310; P:GO:0044210; P:GO:0046940; F:GO:0005524; F:GO:0033862; C:GO:0005737	P:phosphorylation; P:'de novo' CTP biosynthetic process; P:nucleoside monophosphate phosphorylation; F:ATP binding; F:UMP kinase activity; C:cytoplasm	0	-4.37	0	0
1184	Cgl2710	-	sulfurtransferase	0	-2.36	-2.5	-4.54	F:GO:0016740	F:transferase activity	0	-2.36	0	0
1185	Cgl0485	rplJ	50S ribosomal protein L10	0	-6.16	-6.51	-4.56	P:GO:0006412; P:GO:0042254; F:GO:0070180; C:GO:0005840	P:translation; P:ribosome biogenesis; F:large ribosomal subunit rRNA binding; C:ribosome	0	-6.16	0	0
1186	Cgl1211	atpG	F0F1 ATP synthase subunit gamma	0	-4.85	-5.24	-4.56	P:GO:0042777; F:GO:0005524; F:GO:0016787; F:GO:0046933; C:GO:0005886; C:GO:0045261	P:plasma membrane ATP synthesis coupled proton transport; F:ATP binding; F:hydrolase activity; F:proton-transporting ATP synthase activity, rotational mechanism; C:plasma membrane; C:proton-transporting ATP synthase complex, catalytic core F(1)	5.1e-10	-4.85	0	0
1187	Cgl0542	rplO	50S ribosomal protein L15	0	-6.53	-6.65	-4.58	P:GO:0006412; F:GO:0003735; F:GO:0019843; C:GO:0015934	P:translation; F:structural constituent of ribosome; F:rRNA binding; C:large ribosomal subunit	0	-6.53	0	0
1188	Cgl1616	-	YbjN domain-containing protein	-2.53	-3.28	-3.38	-4.6	0	0	0	-3.28	0	0
1189	Cgl2195	ctaC	cytochrome C oxidase subunit II	0	-5.46	-5.76	-4.61	P:GO:0022900; P:GO:1902600; F:GO:0004129; F:GO:0005507; C:GO:0005886; C:GO:0016021; C:GO:0070469	P:electron transport chain; P:proton transmembrane transport; F:cytochrome-c oxidase activity; F:copper ion binding; C:plasma membrane; C:integral component of membrane; C:respirasome	0	-5.46	0	0
1190	Cgl2251	-	ABC transporter substrate-binding protein	-2.66	-3.15	-3.22	-4.61	0	0	0	-3.15	0	0
1191	Cgl2887	-	NAD(P)/FAD-dependent oxidoreductase	-3.48	-3.16	-3.14	-4.61	F:GO:0004499; F:GO:0050660; F:GO:0050661	F:N,N-dimethylaniline monooxygenase activity; F:flavin adenine dinucleotide binding; F:NADP binding	0	-3.16	0	0
1192	Cgl3099	rpmH	50S ribosomal protein L34	0	-4.71	-5.18	-4.63	P:GO:0006412; F:GO:0003735; C:GO:0005840	P:translation; F:structural constituent of ribosome; C:ribosome	0	-4.71	0	0
1193	Cgl2189	qcrB	cytochrome bc complex cytochrome b subunit	-2.27	-5.2	-5.71	-4.67	P:GO:0022904; F:GO:0009055; F:GO:0046872; C:GO:0005886; C:GO:0016021; C:GO:0070469	P:respiratory electron transport chain; F:electron transfer activity; F:metal ion binding; C:plasma membrane; C:integral component of membrane; C:respirasome	0	-5.2	0	0
1194	Cgl0789	-	pyridoxal 5'-phosphate synthase glutaminase subunit PdxT	-2.19	-3.62	-3.72	-4.69	P:GO:0006543; P:GO:0009432; P:GO:0042823; F:GO:0004359; F:GO:0016757; F:GO:0036381	P:glutamine catabolic process; P:SOS response; P:pyridoxal phosphate biosynthetic process; F:glutaminase activity; F:transferase activity, transferring glycosyl groups; F:pyridoxal 5'-phosphate synthase (glutamine hydrolysing) activity	0	-3.62	0	0
1195	Cgl1408	-	hypothetical protein cgR_5030	0	-3.53	-4.32	-4.7	0	0	0.75	-3.53	0	0
1196	Cgl2520	-	putative membrane protein	0	-2.65	-2.68	-4.7	C:GO:0016021	C:integral component of membrane	2.9e-08	-2.65	0	0
1197	Cgl1990	-	ABC transporter substrate-binding protein	-3.24	-4.76	-4.87	-4.74	P:GO:0055085; C:GO:0043190	P:transmembrane transport; C:ATP-binding cassette (ABC) transporter complex	0	-4.76	0	0
1198	Cgl3049	-	MULTISPECIES: hypothetical protein	0	-3.58	-3.76	-4.74	0	0	0	-3.58	0	0
1199	Cgl0788	-	pyridoxal biosynthesis lyase PdxS	0	-3.54	-3.63	-4.75	P:GO:0006541; P:GO:0042823; F:GO:0016757; F:GO:0036381	P:glutamine metabolic process; P:pyridoxal phosphate biosynthetic process; F:transferase activity, transferring glycosyl groups; F:pyridoxal 5'-phosphate synthase (glutamine hydrolysing) activity	0	-3.54	0	0
1200	Cgl1394	argC	N-acetyl-gamma-glutamyl-phosphate reductase	-2.37	-3.49	-3.46	-4.75	P:GO:0006526; F:GO:0003942; F:GO:0046983; F:GO:0051287; C:GO:0005737	P:arginine biosynthetic process; F:N-acetyl-gamma-glutamyl-phosphate reductase activity; F:protein dimerization activity; F:NAD binding; C:cytoplasm	0	-3.49	0	0
1201	Cgl3066	proP	MFS transporter	-3.03	-3.85	-3.8	-4.77	P:GO:0006865; P:GO:0055085; F:GO:0015293; C:GO:0005886; C:GO:0016021	P:amino acid transport; P:transmembrane transport; F:symporter activity; C:plasma membrane; C:integral component of membrane	0	-3.85	0	0
1202	Cgl2017	-	DUF2631 domain-containing protein	0	-3.35	-4.55	-4.78	F:GO:0047134; C:GO:0005886; C:GO:0016021	F:protein-disulfide reductase activity; C:plasma membrane; C:integral component of membrane	0	-3.35	0	0
1203	Cgl2106	-	TetR family transcriptional regulator	0	0	0	-4.82	P:GO:0045892; P:GO:0046677; F:GO:0003677; F:GO:0046872	P:negative regulation of transcription, DNA-templated; P:response to antibiotic; F:DNA binding; F:metal ion binding	5.3e-12	-1.79	4.6e-10	0
1204	Cgl1344	-	MULTISPECIES: hypothetical protein	-3.96	-5.33	-4.81	-4.93	0	0	0	-5.33	0	0
1205	Cgl2526	ftn	ferritin-like protein	0	-4.58	-4.26	-4.93	P:GO:0006826; P:GO:0006879; F:GO:0004322; F:GO:0008199; C:GO:0005737	P:iron ion transport; P:cellular iron ion homeostasis; F:ferroxidase activity; F:ferric iron binding; C:cytoplasm	0	-4.58	0	0
1206	Cgl0402	gpmA	histidine phosphatase family protein	0	-4.54	-4.86	-4.96	P:GO:0006094; P:GO:0006096; F:GO:0046538	P:gluconeogenesis; P:glycolytic process; F:2,3-bisphosphoglycerate-dependent phosphoglycerate mutase activity	0	-4.54	0	0
1207	Cgl2226	-	RecName: Full=Uncharacterized protein Cgl2226/cg2444; Short=P24	-3.07	-5.06	-5.39	-4.96	0	0	0	-5.06	0	0
1208	Cgl2565	sucD	succinyl-CoA synthetase subunit alpha	-4.89	-4.79	-4.62	-4.99	P:GO:0006099; F:GO:0000166; F:GO:0004775	P:tricarboxylic acid cycle; F:nucleotide binding; F:succinate-CoA ligase (ADP-forming) activity	0	-4.79	0	0
1209	Cgl2105	-	putative secreted protein	-3.4	-4.6	-4.55	-5	0	0	0	-4.6	0	0
1210	Cgl1029	-	amino acid transporter	0	-3.06	-2.75	-5.05	C:GO:0016021	C:integral component of membrane	0	-3.06	0	0
1211	Cgl1161	-	DUF2269 domain-containing protein	0	-3.03	-3.18	-5.09	C:GO:0016021	C:integral component of membrane	0	-3.03	0	0
1212	Cgl1951	gluB	ABC transporter	-4.63	-5.58	-5.38	-5.09	P:GO:0006865; C:GO:0005886	P:amino acid transport; C:plasma membrane	0	-5.58	0	0
1213	Cgl3098	rnpA	ribonuclease P protein component	0	-4.19	-4.59	-5.12	P:GO:0001682; P:GO:0090502; F:GO:0000049; F:GO:0004526	P:tRNA 5'-leader removal; P:RNA phosphodiester bond hydrolysis, endonucleolytic; F:tRNA binding; F:ribonuclease P activity	0	-4.19	0	0
1214	Cgl1619	efp	elongation factor P	0	-3.93	-3.91	-5.15	P:GO:0006414; F:GO:0003746; C:GO:0005737	P:translational elongation; F:translation elongation factor activity; C:cytoplasm	0	-3.93	0	0
1215	Cgl1163	putP	sodium/proline symporter PutP	-2.58	-4.4	-4.19	-5.17	P:GO:0003333; P:GO:0006814; P:GO:0015824; F:GO:0005298; F:GO:0031402; C:GO:0005886; C:GO:0016021	P:amino acid transmembrane transport; P:sodium ion transport; P:proline transport; F:proline:sodium symporter activity; F:sodium ion binding; C:plasma membrane; C:integral component of membrane	0	-4.4	0	0
1216	Cgl1657	secF	preprotein translocase subunit SecF	0	-2.49	-2.61	-5.17	P:GO:0006605; P:GO:0043952; P:GO:0065002; F:GO:0015450; C:GO:0005886; C:GO:0016021	P:protein targeting; P:protein transport by the Sec complex; P:intracellular protein transmembrane transport; F:P-P-bond-hydrolysis-driven protein transmembrane transporter activity; C:plasma membrane; C:integral component of membrane	8.6e-08	-2.49	0	0
1217	Cgl2886	-	FAD-dependent oxidoreductase	-5.06	-3.94	-3.96	-5.18	F:GO:0004499; F:GO:0050660; F:GO:0050661	F:N,N-dimethylaniline monooxygenase activity; F:flavin adenine dinucleotide binding; F:NADP binding	0	-3.94	0	0
1218	Cgl2194	ctaF	cytochrome c oxidase subunit 4	0	-5.53	-5.39	-5.2	P:GO:0022900; P:GO:1902600; F:GO:0004129; C:GO:0005886; C:GO:0016021	P:electron transport chain; P:proton transmembrane transport; F:cytochrome-c oxidase activity; C:plasma membrane; C:integral component of membrane	0	-5.53	0	0
1219	Cgl2460	-	ABC transporter permease	-5.42	-5.54	-5.33	-5.22	P:GO:0008643; P:GO:0055085; C:GO:0005886; C:GO:0016021	P:carbohydrate transport; P:transmembrane transport; C:plasma membrane; C:integral component of membrane	0	-5.54	0	0
1220	Cgl0534	-	oxidoreductase	0	0	0	-5.24	C:GO:0016021	C:integral component of membrane	0.001	-1.74	6.4e-07	0
1221	Cgl0565	-	Hypothetical protein	0	-6.45	-5.18	-5.24	0	0	0	-6.45	0	0
1222	Cgl0631	crtX	glucosyl-3-phosphoglycerate synthase	0	-2.61	-2.01	-5.27	F:GO:0016740	F:transferase activity	0.013	-2.61	1.5e-10	0
1223	Cgl2152	-	cell division protein SepF	-2.06	-3.93	-4.1	-5.27	P:GO:0000917; P:GO:0043093; C:GO:0005737	P:division septum assembly; P:FtsZ-dependent cytokinesis; C:cytoplasm	0	-3.93	0	0
1224	Cgl2523	ctaD	cytochrome c oxidase subunit I	0	-6.01	-6.29	-5.31	P:GO:0006119; P:GO:0009060; P:GO:0015990; P:GO:0022900; F:GO:0004129; F:GO:0020037; F:GO:0046872; C:GO:0005886; C:GO:0016021; C:GO:0070469	P:oxidative phosphorylation; P:aerobic respiration; P:electron transport coupled proton transport; P:electron transport chain; F:cytochrome-c oxidase activity; F:heme binding; F:metal ion binding; C:plasma membrane; C:integral component of membrane; C:respirasome	0	-6.01	0	0
1225	Cgl2807	adhA	alcohol dehydrogenase	-5.16	-4.39	-4.33	-5.31	F:GO:0004022	F:alcohol dehydrogenase (NAD+) activity	0	-4.39	0	0
1226	Cgl1212	atpD	F0F1 ATP synthase subunit beta	0	-5.35	-5.73	-5.37	P:GO:0015986; F:GO:0005524; F:GO:0016787; F:GO:0046933; F:GO:0046961; C:GO:0005886; C:GO:0045261	P:ATP synthesis coupled proton transport; F:ATP binding; F:hydrolase activity; F:proton-transporting ATP synthase activity, rotational mechanism; F:proton-transporting ATPase activity, rotational mechanism; C:plasma membrane; C:proton-transporting ATP synthase complex, catalytic core F(1)	0	-5.35	0	0
1227	Cgl1209	atpH	F0F1 ATP synthase subunit delta	0	-5.36	-5.69	-5.38	P:GO:0015986; F:GO:0016787; F:GO:0046933; C:GO:0005886; C:GO:0045261	P:ATP synthesis coupled proton transport; F:hydrolase activity; F:proton-transporting ATP synthase activity, rotational mechanism; C:plasma membrane; C:proton-transporting ATP synthase complex, catalytic core F(1)	0	-5.36	0	0
1228	Cgl1173	-	Hypothetical protein	0	-2.02	0	-5.4	0	0	0.002	-2.02	5.1e-12	0
1229	Cgl2360	-	MULTISPECIES: hypothetical protein	0	0	0	-5.41	0	0	0.00013	-1.98	2.9e-10	0
1230	Cgl1343	tnp24a(ISCg24a)	IS3 family transposase	-3.58	-3.92	-3.34	-5.42	P:GO:0015074; P:GO:0032196; F:GO:0003676	P:DNA integration; P:transposition; F:nucleic acid binding	0	-3.92	0	0
1231	Cgl0371	sdhA	succinate dehydrogenase flavoprotein subunit	-2.19	-4.91	-5.52	-5.44	F:GO:0008177	F:succinate dehydrogenase (ubiquinone) activity	0	-4.91	0	0
1232	Cgl0833	-	cation acetate symporter	-3.57	-4.34	-4.42	-5.48	P:GO:0055085; F:GO:0015293; C:GO:0005886; C:GO:0016021	P:transmembrane transport; F:symporter activity; C:plasma membrane; C:integral component of membrane	0	-4.34	0	0
1233	Cgl0915	-	antibiotic biosynthesis monooxygenase	-4	-6.48	-5.99	-5.49	0	0	0	-6.48	0	0
1234	Cgl0832	-	DUF485 domain-containing protein	-3.86	-4.51	-4.64	-6	C:GO:0016021	C:integral component of membrane	0	-4.51	0	0
1235	Cgl2566	sucC	ADP-forming succinate--CoA ligase subunit beta	-3.8	-3.99	-3.71	-6.11	P:GO:0006099; F:GO:0000287; F:GO:0004775; F:GO:0005524	P:tricarboxylic acid cycle; F:magnesium ion binding; F:succinate-CoA ligase (ADP-forming) activity; F:ATP binding	0	-3.99	0	0
1236	Cgl0972	porB	porin	-3.12	-5.34	-5.26	-6.12	0	0	0	-5.34	0	0
1237	Cgl1208	atpF	F0F1 ATP synthase subunit B	0	-5.29	-5.61	-6.13	P:GO:0015986; F:GO:0016787; F:GO:0046933; C:GO:0005886; C:GO:0016021; C:GO:0045263	P:ATP synthesis coupled proton transport; F:hydrolase activity; F:proton-transporting ATP synthase activity, rotational mechanism; C:plasma membrane; C:integral component of membrane; C:proton-transporting ATP synthase complex, coupling factor F(o)	0	-5.29	0	0
1238	Cgl0372	sdhB	succinate dehydrogenase	-2.6	-4.7	-5.47	-6.33	P:GO:0006099; P:GO:0022900; F:GO:0008177; F:GO:0009055; F:GO:0046872; F:GO:0051537; F:GO:0051538; F:GO:0051539	P:tricarboxylic acid cycle; P:electron transport chain; F:succinate dehydrogenase (ubiquinone) activity; F:electron transfer activity; F:metal ion binding; F:2 iron, 2 sulfur cluster binding; F:3 iron, 4 sulfur cluster binding; F:4 iron, 4 sulfur cluster binding	0	-4.7	0	0
1239	Cgl2569	actA	Acetyl-CoA hydrolase	-2.81	-5.63	-6.19	-6.41	P:GO:0006083; P:GO:0006084; P:GO:0019679; F:GO:0003986; F:GO:0008775	P:acetate metabolic process; P:acetyl-CoA metabolic process; P:propionate metabolic process, methylcitrate cycle; F:acetyl-CoA hydrolase activity; F:acetate CoA-transferase activity	0	-5.63	0	0
1240	Cgl2459	-	sugar ABC transporter permease	-5.13	-5.8	-5.67	-6.54	P:GO:0055085; C:GO:0005886; C:GO:0016021	P:transmembrane transport; C:plasma membrane; C:integral component of membrane	0	-5.8	0	0
1241	Cgl2921	-	alanine:cation symporter family protein	-4.22	-5.2	-4.84	-6.55	P:GO:0006814; P:GO:0032328; P:GO:0055085; F:GO:0015655; C:GO:0005886; C:GO:0016021	P:sodium ion transport; P:alanine transport; P:transmembrane transport; F:alanine:sodium symporter activity; C:plasma membrane; C:integral component of membrane	0	-5.2	0	0
1242	Cgl2557	-	putative membrane protein	0	-4.34	-6.92	-6.78	F:GO:0047134; C:GO:0016021	F:protein-disulfide reductase activity; C:integral component of membrane	0	-2.84	0	0
1243	Cgl0370	sdhC	succinate dehydrogenase cytochrome b subunit	0	-4.88	-5.74	-6.97	F:GO:0016627; F:GO:0046872; C:GO:0016021	F:oxidoreductase activity, acting on the CH-CH group of donors; F:metal ion binding; C:integral component of membrane	0	-4.88	0	0
1244	Cgl0727	-	ABC transporter substrate-binding protein	-4.41	-5.26	-5.17	-7.04	0	0	0	-5.26	0	0
1245	Cgl1207	atpE	F0F1 ATP synthase subunit C	-2.72	-5.35	-5.82	-7.56	P:GO:0015986; F:GO:0008289; F:GO:0016787; F:GO:0046933; C:GO:0005886; C:GO:0016021; C:GO:0045263	P:ATP synthesis coupled proton transport; F:lipid binding; F:hydrolase activity; F:proton-transporting ATP synthase activity, rotational mechanism; C:plasma membrane; C:integral component of membrane; C:proton-transporting ATP synthase complex, coupling factor F(o)	0	-5.35	0	0
1246	Cgl3007	mez	malate dehydrogenase	-3.1	-4.45	-4.43	-7.65	F:GO:0004471; F:GO:0004473; F:GO:0008948; F:GO:0046872; F:GO:0051287	F:malate dehydrogenase (decarboxylating) (NAD+) activity; F:malate dehydrogenase (decarboxylating) (NADP+) activity; F:oxaloacetate decarboxylase activity; F:metal ion binding; F:NAD binding	0	-4.45	0	0
1247	Cgl0457	-	thioesterase	0	0	0	-1000000	0	0	1	-0.14	0.47	0
1248	Cgl0655	-	YbdD/YjiX family protein	0	0	0	-1000000	0	0	0.1	0.52	0.062	1.1e-13
1249	Cgl0837	-	septum formation family protein	0	0	0	-1000000	0	0	0.89	0.37	0.074	0
1250	Cgl1162	-	HNH endonuclease	0	0	0	-1000000	P:GO:0090305; F:GO:0004519	P:nucleic acid phosphodiester bond hydrolysis; F:endonuclease activity	3.2e-05	-0.72	0.077	0
1251	Cgl1934	-	DeoR/GlpR transcriptional regulator	0	0	0	-1000000	P:GO:0006355; F:GO:0003677; F:GO:0003700; F:GO:0016787	P:regulation of transcription, DNA-templated; F:DNA binding; F:DNA-binding transcription factor activity; F:hydrolase activity	4.5e-05	-1.25	4.3e-14	0
1252	Cgl2013	-	Hypothetical protein	0	0	0	-1000000	0	0	5.4e-12	4.32	0	3.5e-10
1253	Cgl2215	-	MULTISPECIES: hypothetical protein	0	0	0	-1000000	0	0	0.49	-1.22	0.054	0
1254	Cgl2272	-	mannitol-1-phosphate 5-dehydrogenase	0	0	0	-1000000	P:GO:0019594; P:GO:0055114; F:GO:0003824; F:GO:0008926; F:GO:0016491	P:mannitol metabolic process; P:obsolete oxidation-reduction process; F:catalytic activity; F:mannitol-1-phosphate 5-dehydrogenase activity; F:oxidoreductase activity	0.00058	0.65	4.8e-09	4.2e-06
1255	Cgl2372	-	Predicted acetyltransferase	0	-2.22	0	-1000000	F:GO:0016740	F:transferase activity	3.4e-08	-2.22	8.4e-06	0
1256	Cgl2400	catC	muconolactone delta-isomerase	0	-3.02	-2.49	-1000000	P:GO:0042952; F:GO:0016159	P:beta-ketoadipate pathway; F:muconolactone delta-isomerase activity	7.8e-09	-3.02	0	0
1257	Cgl2476	-	ankyrin repeat domain-containing protein	0	0	0	-1000000	0	0	0.004	0.51	0.019	4.6e-08
1258	Cgl2477	-	choline BCCT transporter BetT	0	0	0	-1000000	P:GO:0055085; P:GO:0071705; F:GO:0022857; C:GO:0005886; C:GO:0016021	P:transmembrane transport; P:nitrogen compound transport; F:transmembrane transporter activity; C:plasma membrane; C:integral component of membrane	0.58	-1.05	0.083	0

## Sheet: Dataset S3
Table S3: List of genes differentially expressed in presence of 50mM of [Chl][Lys] in a fed-batch bioreactor
S. No	Gene	Gene name	Description	Differential Expression Log2 Ratio					GO	GO Term	Differential Expression p-value
				6.5 h (With IL)/6.5 h (No IL)	16.5 h (With IL)/16.5 h (No IL)	24 h (With IL)/24 h (No IL)	41 h (With IL)/41 h (No IL)	65 h (With IL)/65 h (No IL)			6.5 h (With IL)/6.5 h (No IL)	16.5 h (With IL)/16.5 h (No IL)	24 h (With IL)/24 h (No IL)	41 h (With IL)/41 h (No IL)	65 h (With IL)/65 h (No IL)
1	Cgl2215		MULTISPECIES: hypothetical protein	0	0	3.88	2.55	1000000	0	0	0.096	3.2e-14	0	0	3e-08
2	Cgl1207	atpE	F0F1 ATP synthase subunit C	0	0	4.71	4.46	5.72	P:GO:0015986; F:GO:0008289; F:GO:0016787; F:GO:0046933; C:GO:0005886; C:GO:0016021; C:GO:0045263	P:ATP synthesis coupled proton transport; F:lipid binding; F:hydrolase activity; F:proton-transporting ATP synthase activity, rotational mechanism; C:plasma membrane; C:integral component of membrane; C:proton-transporting ATP synthase complex, coupling factor F(o)	0	0.39	0	0	0
3	Cgl1208	atpF	F0F1 ATP synthase subunit B	0	0	4.31	4.07	4.5	P:GO:0015986; F:GO:0016787; F:GO:0046933; C:GO:0005886; C:GO:0016021; C:GO:0045263	P:ATP synthesis coupled proton transport; F:hydrolase activity; F:proton-transporting ATP synthase activity, rotational mechanism; C:plasma membrane; C:integral component of membrane; C:proton-transporting ATP synthase complex, coupling factor F(o)	0	2.9e-06	0	0	0
4	Cgl2152		cell division protein SepF	0	0	2.4	2.26	4.41	P:GO:0000917; P:GO:0043093; C:GO:0005737	P:division septum assembly; P:FtsZ-dependent cytokinesis; C:cytoplasm	0.38	0.012	0	0	0
5	Cgl1343	tnp24a(ISCg24a)	IS3 family transposase	0	0	2.31	2.17	4.23	P:GO:0015074; P:GO:0032196; F:GO:0003676	P:DNA integration; P:transposition; F:nucleic acid binding	0.061	0.003	1.5e-13	0	0.00032
6	Cgl0140		hypothetical protein CGBL_0101740	0	0	2.22	3.63	3.89	0	0	0.064	6.1e-08	0	0	0
7	Cgl2017		DUF2631 domain-containing protein	0	0	4.16	4.58	3.78	F:GO:0047134; C:GO:0005886; C:GO:0016021	F:protein-disulfide reductase activity; C:plasma membrane; C:integral component of membrane	0	0.26	0	0	0
8	Cgl0102		peptidase M20	0	0	3.03	3.83	3.77	P:GO:0006508; F:GO:0004180	P:proteolysis; F:carboxypeptidase activity	2.2e-08	0.11	0	0	0
9	Cgl2226		RecName: Full=Uncharacterized protein Cgl2226/cg2444; Short=P24	0	0	2.08	2.68	3.65	0	0	0	0.0025	0	0	0
10	Cgl1212	atpD	F0F1 ATP synthase subunit beta	0	0	4.85	4.8	3.61	P:GO:0015986; F:GO:0005524; F:GO:0016787; F:GO:0046933; F:GO:0046961; C:GO:0005886; C:GO:0045261	P:ATP synthesis coupled proton transport; F:ATP binding; F:hydrolase activity; F:proton-transporting ATP synthase activity, rotational mechanism; F:proton-transporting ATPase activity, rotational mechanism; C:plasma membrane; C:proton-transporting ATP synthase complex, catalytic core F(1)	0	8.4e-07	0	0	0
11	Cgl2194	ctaF	cytochrome c oxidase subunit 4	0	0	4.94	3.54	3.61	P:GO:0022900; P:GO:1902600; F:GO:0004129; C:GO:0005886; C:GO:0016021	P:electron transport chain; P:proton transmembrane transport; F:cytochrome-c oxidase activity; C:plasma membrane; C:integral component of membrane	0.67	0	0	0	0
12	Cgl1209	atpH	F0F1 ATP synthase subunit delta	0	0	4.25	4.26	3.51	P:GO:0015986; F:GO:0016787; F:GO:0046933; C:GO:0005886; C:GO:0045261	P:ATP synthesis coupled proton transport; F:hydrolase activity; F:proton-transporting ATP synthase activity, rotational mechanism; C:plasma membrane; C:proton-transporting ATP synthase complex, catalytic core F(1)	0	1.5e-15	0	0	0
13	Cgl1616		YbjN domain-containing protein	0	0	3.01	4.05	3.48	0	0	0.74	0.024	0	0	3.2e-07
14	Cgl2189	qcrB	cytochrome bc complex cytochrome b subunit	0	0	4.54	4.27	3.44	P:GO:0022904; F:GO:0009055; F:GO:0046872; C:GO:0005886; C:GO:0016021; C:GO:0070469	P:respiratory electron transport chain; F:electron transfer activity; F:metal ion binding; C:plasma membrane; C:integral component of membrane; C:respirasome	3.4e-11	0.2	0	0	0
15	Cgl2523	ctaD	cytochrome c oxidase subunit I	0	0	6.06	5.38	3.42	P:GO:0006119; P:GO:0009060; P:GO:0015990; P:GO:0022900; F:GO:0004129; F:GO:0020037; F:GO:0046872; C:GO:0005886; C:GO:0016021; C:GO:0070469	P:oxidative phosphorylation; P:aerobic respiration; P:electron transport coupled proton transport; P:electron transport chain; F:cytochrome-c oxidase activity; F:heme binding; F:metal ion binding; C:plasma membrane; C:integral component of membrane; C:respirasome	0	0	0	0	0
16	Cgl2248	aceE	pyruvate dehydrogenase (acetyl-transferring), homodimeric type	0	0	3.25	4.32	3.36	P:GO:0006096; F:GO:0004739; F:GO:0046872	P:glycolytic process; F:pyruvate dehydrogenase (acetyl-transferring) activity; F:metal ion binding	4.8e-09	2.2e-11	0	0	0
17	Cgl0281		MULTISPECIES: DUF4177 domain-containing protein	0	0	2.4	3.21	3.34	0	0	0.8	0.032	0	0	1.5e-13
18	Cgl1097		putative secreted protein	0	0	4.67	3.95	3.33	0	0	9e-12	0.4	0	0	1.1e-13
19	Cgl3050		Hypothetical protein	0	0	4.09	4.14	3.32	C:GO:0016021	C:integral component of membrane	0.28	2.2e-09	0	0	2.2e-12
20	Cgl1441	odhI	AChain A, Oxoglutarate dehydrogenase inhibitor	0	0	3.38	4.88	3.31	F:GO:0005515; C:GO:0005737	F:protein binding; C:cytoplasm	1.9e-10	6.6e-20	0	0	0
21	Cgl0786		UPF0182 family protein	0	0	3.71	4.15	3.25	C:GO:0005886; C:GO:0016021	C:plasma membrane; C:integral component of membrane	1.7e-13	8.7e-06	0	0	0
22	Cgl1261		L-glyceraldehyde 3-phosphate reductase	0	0	2.19	2.09	3.25	F:GO:0016491	F:oxidoreductase activity	0.24	0.12	0	0	2.5e-16
23	Cgl1135		hypothetical protein CGBL_0112190	0	0	2.71	3.22	3.2	0	0	1.1e-07	0.012	0	0	2.6e-15
24	Cgl2024	pyrH	uridylate kinase	0	0	3.03	3.65	3.16	P:GO:0016310; P:GO:0044210; P:GO:0046940; F:GO:0005524; F:GO:0033862; C:GO:0005737	P:phosphorylation; P:'de novo' CTP biosynthetic process; P:nucleoside monophosphate phosphorylation; F:ATP binding; F:UMP kinase activity; C:cytoplasm	1.9e-05	4.8e-05	0	0	5.5e-10
25	Cgl1210	atpA	F0F1 ATP synthase subunit alpha	0	0	4.24	3.97	3.13	P:GO:0015986; F:GO:0005524; F:GO:0016787; F:GO:0046933; F:GO:0046961; C:GO:0005886; C:GO:0045261	P:ATP synthesis coupled proton transport; F:ATP binding; F:hydrolase activity; F:proton-transporting ATP synthase activity, rotational mechanism; F:proton-transporting ATPase activity, rotational mechanism; C:plasma membrane; C:proton-transporting ATP synthase complex, catalytic core F(1)	0	2.7e-10	0	0	0
26	Cgl1617		hypothetical protein	0	0	2.11	2.71	3.08	0	0	0.28	0.16	0	0	7.1e-10
27	Cgl1211	atpG	F0F1 ATP synthase subunit gamma	0	0	4.2	4.31	3.06	P:GO:0042777; F:GO:0005524; F:GO:0016787; F:GO:0046933; C:GO:0005886; C:GO:0045261	P:plasma membrane ATP synthesis coupled proton transport; F:ATP binding; F:hydrolase activity; F:proton-transporting ATP synthase activity, rotational mechanism; C:plasma membrane; C:proton-transporting ATP synthase complex, catalytic core F(1)	0	2.1e-07	0	0	4.1e-17
28	Cgl0058		vacuolar transporter	0	0	3.16	3.12	3.05	0	0	0.0053	0.68	0	0	2.4e-06
29	Cgl0059		DUF4956 domain-containing protein	0	0	2.94	2.8	2.98	C:GO:0016021	C:integral component of membrane	0.00017	0.64	0	0	2.7e-07
30	Cgl0969		MULTISPECIES: antitoxin	0	0	2.64	2.94	2.96	0	0	0.044	1	0	0	8.5e-13
31	Cgl1543		nucleoside-diphosphate sugar epimerase	0	0	2.59	3.14	2.88	0	0	0.053	0.93	0	0	7e-17
32	Cgl0101		AbgT family transporter	0	0	3.27	3.96	2.87	P:GO:1902604; F:GO:0015558; C:GO:0016021	P:p-aminobenzoyl-glutamate transmembrane transport; F:secondary active p-aminobenzoyl-glutamate transmembrane transporter activity; C:integral component of membrane	0.011	0.57	0	0	0
33	Cgl1619	efp	elongation factor P	0	0	3.03	2.44	2.86	P:GO:0006414; F:GO:0003746; C:GO:0005737	P:translational elongation; F:translation elongation factor activity; C:cytoplasm	5e-05	1.3e-09	0	0	3.1e-05
34	Cgl1096		DUF402 domain-containing protein	0	0	3.47	3.32	2.85	0	0	3.3e-14	1	0	0	3e-07
35	Cgl2525	nrdF	ribonucleotide-diphosphate reductase subunit beta	0	0	4.14	4.21	2.83	P:GO:0006260; P:GO:0009263; F:GO:0004748; F:GO:0046872; C:GO:0005971	P:DNA replication; P:deoxyribonucleotide biosynthetic process; F:ribonucleoside-diphosphate reductase activity, thioredoxin disulfide as acceptor; F:metal ion binding; C:ribonucleoside-diphosphate reductase complex	1	0.014	0	0	8.2e-13
36	Cgl1607	ihf	putative integration host factor cIHF	0	0	3.13	3.08	2.82	0	0	0.078	0.71	0	0	0
37	Cgl2081		Hypothetical protein	0	0	2.65	2.7	2.81	0	0	0.33	0.9	0	0	0.00086
38	Cgl2237		Zn-ribbon protein	0	0	2.06	3.63	2.8	0	0	0.0022	0.052	0	0	2.3e-06
39	Cgl2207	aceF	2-oxoglutarate dehydrogenase, E2 component, dihydrolipoamide succinyltransferase	0	0	3.36	3.95	2.79	P:GO:0006096; P:GO:0006099; F:GO:0004742	P:glycolytic process; P:tricarboxylic acid cycle; F:dihydrolipoyllysine-residue acetyltransferase activity	0.093	0.0043	0	0	9.4e-13
40	Cgl0370	sdhC	succinate dehydrogenase cytochrome b subunit	0	0	3.61	2.65	2.79	F:GO:0016627; F:GO:0046872; C:GO:0016021	F:oxidoreductase activity, acting on the CH-CH group of donors; F:metal ion binding; C:integral component of membrane	0.0089	0	0	0	5.9e-06
41	Cgl0772		MULTISPECIES: DUF3107 domain-containing protein	0	0	2.9	2.52	2.78	0	0	0.27	0.16	0	0	0
42	Cgl1533		SPFH/Band 7/PHB domain protein	0	0	2.02	3.33	2.74	P:GO:0006508; F:GO:0008233; C:GO:0016020	P:proteolysis; F:peptidase activity; C:membrane	0.1	0.17	0	0	1.1e-14
43	Cgl2205	pepB	leucyl aminopeptidase	0	0	2.75	2.54	2.74	P:GO:0006508; F:GO:0030145; F:GO:0070006; C:GO:0005737	P:proteolysis; F:manganese ion binding; F:metalloaminopeptidase activity; C:cytoplasm	0.00015	0.65	0	0	1.1e-06
44	Cgl1606	gmk	guanylate kinase	0	0	3.79	3.42	2.69	P:GO:0016310; P:GO:0046037; P:GO:0046710; F:GO:0004385; F:GO:0005524; C:GO:0005737	P:phosphorylation; P:GMP metabolic process; P:GDP metabolic process; F:guanylate kinase activity; F:ATP binding; C:cytoplasm	3.5e-06	0.57	0	0	2e-13
45	Cgl0601		MULTISPECIES: hypothetical protein	0	0	4.53	5.44	2.68	C:GO:0016021	C:integral component of membrane	0	0.0036	0	0	0
46	Cgl0693		thioredoxin reductase	0	0	2.56	4.1	2.67	P:GO:0098869; F:GO:0004791; C:GO:0016021	P:cellular oxidant detoxification; F:thioredoxin-disulfide reductase activity; C:integral component of membrane	0.94	0.72	0	0	0
47	Cgl1139	metE	5-methyltetrahydropteroyltriglutamate--homocysteine S-methyltransferase	0	0	4.78	4.92	2.65	P:GO:0009086; P:GO:0032259; F:GO:0003871; F:GO:0008270	P:methionine biosynthetic process; P:methylation; F:5-methyltetrahydropteroyltriglutamate-homocysteine S-methyltransferase activity; F:zinc ion binding	0	1.3e-09	0	0	0
48	Cgl0396		DUF2505 domain-containing protein	0	0	3.44	3.57	2.65	0	0	3.5e-07	0.15	0	0	1.4e-08
49	Cgl2309	aecD	pyridoxal phosphate-dependent aminotransferase	0	0	3.62	3.61	2.64	P:GO:0009086; F:GO:0004121; F:GO:0008483; F:GO:0030170; F:GO:0047804	P:methionine biosynthetic process; F:cystathionine beta-lyase activity; F:transaminase activity; F:pyridoxal phosphate binding; F:cysteine-S-conjugate beta-lyase activity	0.051	0.057	0	0	1.4e-12
50	Cgl1086	tpx	thiol peroxidase	0	0	3.36	4.46	2.63	P:GO:0098869; F:GO:0008379	P:cellular oxidant detoxification; F:thioredoxin peroxidase activity	8.1e-26	0.031	0	0	0
51	Cgl2195	ctaC	cytochrome C oxidase subunit II	0	0	5.04	4.01	2.62	P:GO:0022900; P:GO:1902600; F:GO:0004129; F:GO:0005507; C:GO:0005886; C:GO:0016021; C:GO:0070469	P:electron transport chain; P:proton transmembrane transport; F:cytochrome-c oxidase activity; F:copper ion binding; C:plasma membrane; C:integral component of membrane; C:respirasome	0.00084	0	0	0	8.6e-12
52	Cgl1558		putative membrane protein	0	0	2.51	2.97	2.6	C:GO:0016021	C:integral component of membrane	0.89	0.028	0	0	1.5e-07
53	Cgl1976	rpsO	30S ribosomal protein S15	0	0	5.55	5.29	2.56	P:GO:0006412; F:GO:0003735; F:GO:0019843; C:GO:0005840	P:translation; F:structural constituent of ribosome; F:rRNA binding; C:ribosome	0	0.47	0	0	0
54	Cgl2190	qcrA	ubiquinol-cytochrome c reductase iron-sulfur subunit	0	0	4.47	4.44	2.53	F:GO:0016491; F:GO:0046872; F:GO:0051537; C:GO:0005886; C:GO:0016021; C:GO:0070469	F:oxidoreductase activity; F:metal ion binding; F:2 iron, 2 sulfur cluster binding; C:plasma membrane; C:integral component of membrane; C:respirasome	1.4e-14	0.02	0	0	1.7e-16
55	Cgl2075		DNA-binding protein	0	0	2.31	2.2	2.52	F:GO:0003677; C:GO:0005840	F:DNA binding; C:ribosome	0.28	0.92	0	0	3.1e-05
56	Cgl1374		DoxX family protein	0	0	2.29	2.8	2.51	C:GO:0016021	C:integral component of membrane	8.5e-07	1.9e-18	0	0	8.1e-11
57	Cgl1523		phospholipid-binding protein	0	0	3.23	4.16	2.5	0	0	0.39	0.5	0	0	9.7e-06
58	Cgl1000		hypothetical protein	0	0	4.06	3.88	2.44	0	0	1.6e-08	0.44	0	0	2.1e-06
59	Cgl2569	actA	Acetyl-CoA hydrolase	0	0	3.01	3.66	2.43	P:GO:0006083; P:GO:0006084; P:GO:0019679; F:GO:0003986; F:GO:0008775	P:acetate metabolic process; P:acetyl-CoA metabolic process; P:propionate metabolic process, methylcitrate cycle; F:acetyl-CoA hydrolase activity; F:acetate CoA-transferase activity	0.0055	0.86	0	0	5.6e-06
60	Cgl0947		ABC transporter permease	0	0	3.28	4.46	2.42	C:GO:0016021	C:integral component of membrane	0	0	0	0	0
61	Cgl0946		ABC transporter ATP-binding protein	0	0	3	4.58	2.39	F:GO:0005524; F:GO:0016887	F:ATP binding; F:ATPase activity	0	0	0	0	0
62	Cgl2023	frr	ribosome recycling factor	0	0	4.28	4.53	2.35	P:GO:0006415; C:GO:0005737	P:translational termination; C:cytoplasm	0.0093	8.5e-06	0	0	5.4e-13
63	Cgl2114		ABC transporter substrate-binding protein	0	0	3.75	3.49	2.34	0	0	0.00011	0.53	0	0	5.8e-11
64	Cgl2129		methionine synthase II (cobalamin-independent)	0	0	3.03	3.02	2.33	P:GO:0009086; P:GO:0032259; F:GO:0003871; F:GO:0008270	P:methionine biosynthetic process; P:methylation; F:5-methyltetrahydropteroyltriglutamate-homocysteine S-methyltransferase activity; F:zinc ion binding	0.00093	2e-18	0	0	1.8e-08
65	Cgl2354	proA	gamma-glutamyl phosphate reductase	0	0	2.17	2.76	2.3	P:GO:0055129; F:GO:0004350; F:GO:0050661; C:GO:0005737	P:L-proline biosynthetic process; F:glutamate-5-semialdehyde dehydrogenase activity; F:NADP binding; C:cytoplasm	2.1e-08	0.00013	0	0	2.2e-08
66	Cgl2588	purL	phosphoribosylformylglycinamidine synthase subunit PurL	0	0	2.95	2.63	2.3	P:GO:0006189; F:GO:0000287; F:GO:0004642; F:GO:0005524; C:GO:0005737	P:'de novo' IMP biosynthetic process; F:magnesium ion binding; F:phosphoribosylformylglycinamidine synthase activity; F:ATP binding; C:cytoplasm	6.6e-06	0.0049	0	0	2.6e-05
67	Cgl2105		putative secreted protein	0	0	2.51	2.48	2.29	0	0	1.4e-16	0.006	0	0	0.00062
68	Cgl0996	glyA	serine hydroxymethyltransferase	0	0	3.93	3.93	2.27	P:GO:0019264; P:GO:0032259; P:GO:0035999; F:GO:0004372; F:GO:0008168; F:GO:0030170; C:GO:0005737	P:glycine biosynthetic process from serine; P:methylation; P:tetrahydrofolate interconversion; F:glycine hydroxymethyltransferase activity; F:methyltransferase activity; F:pyridoxal phosphate binding; C:cytoplasm	0.00033	0.082	0	0	8.8e-20
69	Cgl2623		MULTISPECIES: hypothetical protein	0	0	2.53	2.32	2.27	0	0	0.7	0.45	0	0	2.2e-09
70	Cgl2037	rplS	50S ribosomal protein L19	0	0	4.04	2.2	2.27	P:GO:0006412; F:GO:0003735; C:GO:0005840	P:translation; F:structural constituent of ribosome; C:ribosome	7.3e-12	0.0013	0	0	1.8e-10
71	Cgl2589	purQ	phosphoribosylformylglycinamidine synthase I	0	0	3.2	2.62	2.26	P:GO:0006189; P:GO:0006541; F:GO:0004359; F:GO:0004642; F:GO:0005524; F:GO:0016740; C:GO:0005737	P:'de novo' IMP biosynthetic process; P:glutamine metabolic process; F:glutaminase activity; F:phosphoribosylformylglycinamidine synthase activity; F:ATP binding; F:transferase activity; C:cytoplasm	0.07	0.24	0	0	0.00097
72	Cgl0600	sigD	RNA polymerase sigma factor SigD	0	0	3.53	4.19	2.25	P:GO:2000142; F:GO:0003677; F:GO:0016987	P:regulation of DNA-templated transcription, initiation; F:DNA binding; F:sigma factor activity	1.6e-05	0.97	0	0	4.7e-18
73	Cgl1156		DEAD/DEAH box helicase	0	0	3.81	4.24	2.24	P:GO:0000027; P:GO:0006401; P:GO:0070417; F:GO:0003723; F:GO:0003724; F:GO:0005524; C:GO:0005737	P:ribosomal large subunit assembly; P:RNA catabolic process; P:cellular response to cold; F:RNA binding; F:RNA helicase activity; F:ATP binding; C:cytoplasm	2.6e-08	0.083	0	0	0
74	Cgl2089	pyk	pyruvate kinase	0	0	2.77	4.49	2.22	P:GO:0006096; F:GO:0000287; F:GO:0004743; F:GO:0005524; F:GO:0016301; F:GO:0030955	P:glycolytic process; F:magnesium ion binding; F:pyruvate kinase activity; F:ATP binding; F:kinase activity; F:potassium ion binding	0.0066	0.57	0	0	0
75	Cgl1206	atpB	F0F1 ATP synthase subunit A	0	0	4.7	4.98	2.21	P:GO:0015986; F:GO:0016787; F:GO:0046933; C:GO:0005886; C:GO:0016021; C:GO:0045263	P:ATP synthesis coupled proton transport; F:hydrolase activity; F:proton-transporting ATP synthase activity, rotational mechanism; C:plasma membrane; C:integral component of membrane; C:proton-transporting ATP synthase complex, coupling factor F(o)	0	0.0098	0	0	0
76	Cgl0252	asd	aspartate-semialdehyde dehydrogenase	0	0	3.11	3.22	2.16	P:GO:0009088; P:GO:0009089; P:GO:0009097; P:GO:0019877; P:GO:0071266; F:GO:0004073; F:GO:0046983; F:GO:0050661; F:GO:0051287	P:threonine biosynthetic process; P:lysine biosynthetic process via diaminopimelate; P:isoleucine biosynthetic process; P:diaminopimelate biosynthetic process; P:'de novo' L-methionine biosynthetic process; F:aspartate-semialdehyde dehydrogenase activity; F:protein dimerization activity; F:NADP binding; F:NAD binding	0.00016	0.03	0	0	1.2e-05
77	Cgl0560	infA	translation initiation factor IF-1	0	0	5.54	3.41	2.14	P:GO:0006413; F:GO:0003743; F:GO:0019843; F:GO:0043022; C:GO:0005737	P:translational initiation; F:translation initiation factor activity; F:rRNA binding; F:ribosome binding; C:cytoplasm	0	2.2e-15	0	0	0
78	Cgl1102	fdxC	ferredoxin	0	0	4.42	2.86	2.12	P:GO:0022900; F:GO:0009055; F:GO:0046872; F:GO:0051538; F:GO:0051539	P:electron transport chain; F:electron transfer activity; F:metal ion binding; F:3 iron, 4 sulfur cluster binding; F:4 iron, 4 sulfur cluster binding	1.1e-09	0.99	0	0	4.6e-06
79	Cgl1427	cmk	cytidylate kinase	0	0	3.39	2.64	2.12	P:GO:0006220; P:GO:0016310; P:GO:0046940; F:GO:0004127; F:GO:0005524; C:GO:0005737	P:pyrimidine nucleotide metabolic process; P:phosphorylation; P:nucleoside monophosphate phosphorylation; F:cytidylate kinase activity; F:ATP binding; C:cytoplasm	7.5e-08	0.04	0	0	5.6e-05
80	Cgl2191	qcrC	cytochrome C1	0	0	3.92	4.17	2.1	P:GO:0022900; F:GO:0005506; F:GO:0009055; F:GO:0020037; C:GO:0005886; C:GO:0016021; C:GO:0070469	P:electron transport chain; F:iron ion binding; F:electron transfer activity; F:heme binding; C:plasma membrane; C:integral component of membrane; C:respirasome	3.1e-13	0.14	0	0	2e-13
81	Cgl0411		putative DNA-binding protein Rv0500A	0	0	2.51	3.15	2.05	F:GO:0003677	F:DNA binding	0.12	0	0	0	5.2e-10
82	Cgl0040		septation inhibitor protein	0	0	2.08	2.13	2.02	P:GO:0007049; P:GO:0051301; C:GO:0005887	P:cell cycle; P:cell division; C:integral component of plasma membrane	0.35	0.017	0	0	0.00032
83	Cgl2246		DUF3052 domain-containing protein	0	0	0	2.28	4.19	0	0	0.33	0.0081	0	0	0
84	Cgl2108		SAM-dependent methyltransferase	0	0	0	3.93	3.44	P:GO:0032259; F:GO:0008168	P:methylation; F:methyltransferase activity	0.86	5.5e-05	0	0	0
85	Cgl0256		putative secreted protein	0	0	0	2.44	3.33	0	0	0.0022	0.01	0	0	0
86	Cgl1439		alpha/beta hydrolase	0	0	0	2.09	3.3	F:GO:0016787	F:hydrolase activity	0.58	0.029	4e-16	0	0.00012
87	Cgl0060		CotH kinase family protein	0	0	0	2.39	3.18	0	0	0.0027	0.82	0	0	3.7e-07
88	Cgl2488		DUF3618 domain-containing protein	0	0	0	2.37	3.15	C:GO:0016021	C:integral component of membrane	0.52	0.051	0	0	3.9e-16
89	Cgl2418		MULTISPECIES: hypothetical protein	0	0	2.14	0	3.02	0	0	0.16	0.00033	0	0.0006	3.5e-18
90	Cgl1522		Hypothetical membrane protein	0	0	0	2.71	2.85	C:GO:0016021	C:integral component of membrane	0.48	0.35	0	0	6.7e-06
91	Cgl1610	carA	carbamoyl phosphate synthase small subunit	0	0	0	3.02	2.82	P:GO:0006207; P:GO:0006526; P:GO:0006541; P:GO:0044205; F:GO:0004088; F:GO:0005524	P:'de novo' pyrimidine nucleobase biosynthetic process; P:arginine biosynthetic process; P:glutamine metabolic process; P:'de novo' UMP biosynthetic process; F:carbamoyl-phosphate synthase (glutamine-hydrolyzing) activity; F:ATP binding	1.9e-05	0.15	2.3e-06	0	4e-07
92	Cgl1608	pyrF	orotidine 5'-phosphate decarboxylase	0	0	0	2.1	2.71	P:GO:0006207; P:GO:0044205; F:GO:0004590	P:'de novo' pyrimidine nucleobase biosynthetic process; P:'de novo' UMP biosynthetic process; F:orotidine-5'-phosphate decarboxylase activity	0.022	0.097	0.36	0	1e-08
93	Cgl0818		hypothetical protein cgR_0932	0	0	2.37	0	2.64	0	0	0.96	0.064	0	3.3e-13	0.00068
94	Cgl2853		universal stress protein	0	0	0	2.68	2.63	0	0	0.037	0.16	2.9e-06	0	4.5e-06
95	Cgl2559	pduO	cob(I)yrinic acid a,c-diamide adenosyltransferase	0	0	2.11	0	2.55	P:GO:0009236; F:GO:0005524; F:GO:0008817	P:cobalamin biosynthetic process; F:ATP binding; F:cob(I)yrinic acid a,c-diamide adenosyltransferase activity	0.4	0.052	0	0	0.00032
96	Cgl0014		MULTISPECIES: DUF3566 domain-containing protein	0	0	0	2.09	2.49	C:GO:0016021	C:integral component of membrane	0.24	0.44	1.6e-14	0	0.00031
97	Cgl2590	purS	phosphoribosylformylglycinamidine synthase subunit PurS	0	0	2.65	0	2.48	P:GO:0006189; F:GO:0004642; F:GO:0005524; C:GO:0005737	P:'de novo' IMP biosynthetic process; F:phosphoribosylformylglycinamidine synthase activity; F:ATP binding; C:cytoplasm	7e-06	0.042	0	0	1.2e-06
98	Cgl0885		putative membrane protein	0	0	2.04	0	2.46	C:GO:0016021	C:integral component of membrane	0.21	1.3e-08	0	0	0.00058
99	Cgl1057		magnesium chelatase	0	0	0	2.59	2.41	P:GO:0006355; F:GO:0005524; F:GO:0008134; F:GO:0016851	P:regulation of transcription, DNA-templated; F:ATP binding; F:transcription factor binding; F:magnesium chelatase activity	0.72	0.34	2e-16	0	0.0001
100	Cgl0438		MULTISPECIES: histidine phosphatase family protein	0	0	0	2.08	2.37	0	0	0.0034	0.23	2e-16	0	0.00018
101	Cgl0446		putative secreted protein	0	0	0	3.04	2.36	0	0	1	0.34	2.7e-09	0	5.8e-12
102	Cgl1937	ptsH	HPr family phosphocarrier protein	0	0	0	4.21	2.28	0	0	2.9e-05	5.4e-20	0	0	3.8e-17
103	Cgl0876		serine protease	0	0	2.11	0	2.15	P:GO:0006508; F:GO:0004252; C:GO:0016021	P:proteolysis; F:serine-type endopeptidase activity; C:integral component of membrane	9.2e-06	0.014	2e-16	9e-11	0.0005
104	Cgl2151		putative membrane protein	0	0	0	2.3	2.09	C:GO:0016021	C:integral component of membrane	1.5e-05	0.012	2e-16	0	9.1e-06
105	Cgl1026	lytB	4-hydroxy-3-methylbut-2-enyl diphosphate reductase	0	0	0	2.53	2.03	P:GO:0016114; P:GO:0019288; P:GO:0050992; F:GO:0046872; F:GO:0051539; F:GO:0051745	P:terpenoid biosynthetic process; P:isopentenyl diphosphate biosynthetic process, methylerythritol 4-phosphate pathway; P:dimethylallyl diphosphate biosynthetic process; F:metal ion binding; F:4 iron, 4 sulfur cluster binding; F:4-hydroxy-3-methylbut-2-en-1-yl diphosphate reductase activity	0.0049	0.26	0	0	1.7e-06
106	Cgl2150		cell division protein	0	0	0	3.58	2.02	P:GO:0007049; P:GO:0051301; C:GO:0005737	P:cell cycle; P:cell division; C:cytoplasm	0.74	1	0	0	1.3e-15
107	Cgl0497	tuf	elongation factor Tu	0	0	5.83	5.25	0	P:GO:0006414; F:GO:0003746; F:GO:0003924; F:GO:0005525; C:GO:0005737	P:translational elongation; F:translation elongation factor activity; F:GTPase activity; F:GTP binding; C:cytoplasm	0	0	0	0	0
108	Cgl1010	fum	aspartate ammonia-lyase	0	0	4.23	5.18	0	P:GO:0006099; P:GO:0006106; F:GO:0004333; C:GO:0045239	P:tricarboxylic acid cycle; P:fumarate metabolic process; F:fumarate hydratase activity; C:tricarboxylic acid cycle enzyme complex	0	7.3e-05	0	0	0
109	Cgl0915		antibiotic biosynthesis monooxygenase	0	0	5.3	5.14	0	0	0	0.016	0.008	0	0	0
110	Cgl2557		putative membrane protein	0	-2.65	5.52	5.08	0	F:GO:0047134; C:GO:0016021	F:protein-disulfide reductase activity; C:integral component of membrane	0.053	0	0	0	0
111	Cgl0597	groES	co-chaperonin GroES	0	0	4	4.97	0	P:GO:0006457; F:GO:0005524; C:GO:0005737	P:protein folding; F:ATP binding; C:cytoplasm	0.00025	0.058	0	0	0
112	Cgl2946		putative membrane protein	0	-2.99	4.95	4.81	0	F:GO:0016491; C:GO:0016021	F:oxidoreductase activity; C:integral component of membrane	0.087	0	0	0	0
113	Cgl2258		Hypothetical protein	0	0	5.02	4.77	0	0	0	8.3e-19	0.0017	0	0	9.5e-20
114	Cgl0320		Zn-dependent hydrolase	0	0	4.1	4.75	0	F:GO:0016787	F:hydrolase activity	0.18	4.8e-05	0	0	0
115	Cgl1673		copper chaperone PCu(A)C	0	0	4.5	4.74	0	0	0	2.1e-21	3.2e-17	0	0	1.4e-20
116	Cgl2134		diacetyl reductase	0	0	3.73	4.66	0	F:GO:0016616	F:oxidoreductase activity, acting on the CH-OH group of donors, NAD or NADP as acceptor	0.61	0.042	0	0	0
117	Cgl3049		MULTISPECIES: hypothetical protein	0	0	3.52	4.64	0	0	0	0.65	7e-09	0	0	0
118	Cgl0598	groEL	chaperonin GroEL	0	0	3.75	4.59	0	P:GO:0042026; F:GO:0005524; F:GO:0051082; C:GO:0005737	P:protein refolding; F:ATP binding; F:unfolded protein binding; C:cytoplasm	0.33	0.26	0	0	0
119	Cgl1672		Dyp-type peroxidase	0	0	4.86	4.57	0	P:GO:0098869; F:GO:0004601; F:GO:0020037	P:cellular oxidant detoxification; F:peroxidase activity; F:heme binding	0	0.046	0	0	2.2e-18
120	Cgl1370	uspA1	stress protein	0	0	4.31	4.51	0	0	0	3.5e-25	6.8e-16	0	0	0
121	Cgl0402	gpmA	histidine phosphatase family protein	0	0	3.19	4.42	0	P:GO:0006094; P:GO:0006096; F:GO:0046538	P:gluconeogenesis; P:glycolytic process; F:2,3-bisphosphoglycerate-dependent phosphoglycerate mutase activity	2.2e-23	0.67	0	0	1.7e-15
122	Cgl2411	clpP2	ATP-dependent Clp protease proteolytic subunit	0	0	3.37	4.35	0	P:GO:0006508; F:GO:0004176; F:GO:0004252; C:GO:0005737	P:proteolysis; F:ATP-dependent peptidase activity; F:serine-type endopeptidase activity; C:cytoplasm	0.078	0.14	0	0	2.3e-10
123	Cgl2412	clpP1	ATP-dependent Clp protease proteolytic subunit	0	0	3.56	4.31	0	P:GO:0006508; F:GO:0004176; F:GO:0004252; C:GO:0005737	P:proteolysis; F:ATP-dependent peptidase activity; F:serine-type endopeptidase activity; C:cytoplasm	0.081	0.15	0	0	1.9e-12
124	Cgl0034	ppiA	peptidylprolyl isomerase	0	0	4.4	4.3	0	P:GO:0000413; P:GO:0006457; F:GO:0003755	P:protein peptidyl-prolyl isomerization; P:protein folding; F:peptidyl-prolyl cis-trans isomerase activity	8e-07	0.24	0	0	2.2e-09
125	Cgl2192	ctaE	cytochrome c oxidase subunit 3	0	0	3.73	4.27	0	P:GO:0019646; P:GO:1902600; F:GO:0004129; C:GO:0005886; C:GO:0016021	P:aerobic electron transport chain; P:proton transmembrane transport; F:cytochrome-c oxidase activity; C:plasma membrane; C:integral component of membrane	0.0011	0.34	0	0	1.4e-09
126	Cgl2115		transcriptional regulator	0	0	4.28	4.24	0	0	0	2e-22	0.37	0	0	0
127	Cgl1477		RNA polymerase-binding protein RbpA	0	0	3.15	4.08	0	P:GO:0045893; F:GO:0001000	P:positive regulation of transcription, DNA-templated; F:bacterial-type RNA polymerase core enzyme binding	0.13	3.3e-08	0	0	4.6e-06
128	Cgl0190		FAD-binding oxidoreductase	0	0	2.87	4.08	0	F:GO:0003885; F:GO:0071949; C:GO:0016020	F:D-arabinono-1,4-lactone oxidase activity; F:FAD binding; C:membrane	3.9e-09	0.004	0	0	1.6e-12
129	Cgl0869	rpmB	50S ribosomal protein L28	0	0	5.52	4.07	0	P:GO:0006412; F:GO:0003735; C:GO:0005840	P:translation; F:structural constituent of ribosome; C:ribosome	0	0	0	0	1.5e-05
130	Cgl2582		DUF3073 domain-containing protein	0	0	2.38	4.06	0	0	0	0	4.2e-10	0	0	0
131	Cgl0866	rpsR	30S ribosomal protein S18	0	0	5.42	4.04	0	P:GO:0006412; F:GO:0003735; F:GO:0019843; C:GO:0005840	P:translation; F:structural constituent of ribosome; F:rRNA binding; C:ribosome	0	0	0	0	0.00016
132	Cgl0542	rplO	50S ribosomal protein L15	0	0	6.02	4.03	0	P:GO:0006412; F:GO:0003735; F:GO:0019843; C:GO:0015934	P:translation; F:structural constituent of ribosome; F:rRNA binding; C:large ribosomal subunit	8.6e-12	5.2e-14	0	0	6.1e-07
133	Cgl2454		ABC transporter ATP-binding protein	0	0	3	4	0	P:GO:0045900; F:GO:0000049; F:GO:0005524; F:GO:0016887; F:GO:0019843; F:GO:0043022; C:GO:0005737	P:negative regulation of translational elongation; F:tRNA binding; F:ATP binding; F:ATPase activity; F:rRNA binding; F:ribosome binding; C:cytoplasm	1e-05	0.011	0	0	0
134	Cgl2240	ptpA	low molecular weight phosphotyrosine protein phosphatase	0	0	2.29	4	0	P:GO:0035335; F:GO:0004725	P:peptidyl-tyrosine dephosphorylation; F:protein tyrosine phosphatase activity	1.3e-05	5.2e-05	0	0	1.2e-13
135	Cgl2700	ppa	inorganic pyrophosphatase	0	0	3.62	3.98	0	P:GO:0006796; F:GO:0000287; F:GO:0004427; C:GO:0005737	P:phosphate-containing compound metabolic process; F:magnesium ion binding; F:inorganic diphosphatase activity; C:cytoplasm	2.5e-07	0.08	0	0	0.0062
136	Cgl1340		MULTISPECIES: DUF2283 domain-containing protein	0	0	3.99	3.9	0	0	0	0.89	0.00012	0	0	0.0047
137	Cgl1129	odhA	alpha-ketoglutarate decarboxylase	0	0	2.24	3.88	0	P:GO:0006099; F:GO:0004149; F:GO:0004591; F:GO:0005515; F:GO:0008683; F:GO:0030976; F:GO:0046872	P:tricarboxylic acid cycle; F:dihydrolipoyllysine-residue succinyltransferase activity; F:oxoglutarate dehydrogenase (succinyl-transferring) activity; F:protein binding; F:2-oxoglutarate decarboxylase activity; F:thiamine pyrophosphate binding; F:metal ion binding	0.00017	2.4e-11	0	0	5.3e-08
138	Cgl2188		C40 family peptidase	0	0	3.13	3.87	0	P:GO:0006508; F:GO:0008234; C:GO:0005576	P:proteolysis; F:cysteine-type peptidase activity; C:extracellular region	1.7e-23	0.00019	0	0	2.3e-13
139	Cgl0539	rplR	50S ribosomal protein L18	0	0	5.68	3.86	0	P:GO:0006412; F:GO:0003735; F:GO:0019843; C:GO:0005840	P:translation; F:structural constituent of ribosome; F:rRNA binding; C:ribosome	0	0.00012	0	0	8e-05
140	Cgl1564	sufB	Fe-S cluster assembly protein SufD	0	0	3.61	3.86	0	P:GO:0016226	P:iron-sulfur cluster assembly	0	0.038	0	0	0.0003
141	Cgl1378	infC	translation initiation factor IF-3	0	0	6.75	3.85	0	P:GO:0006413; F:GO:0003743; C:GO:0005737	P:translational initiation; F:translation initiation factor activity; C:cytoplasm	2e-26	4.4e-10	0	0	0.43
142	Cgl0495	fusA	elongation factor G	0	0	3.28	3.83	0	P:GO:0006414; F:GO:0003746; F:GO:0003924; F:GO:0005525; C:GO:0005737	P:translational elongation; F:translation elongation factor activity; F:GTPase activity; F:GTP binding; C:cytoplasm	0.086	4.2e-15	0	0	5e-05
143	Cgl0511	rpsS	30S ribosomal protein S19	0	0	5.9	3.81	0	P:GO:0006412; F:GO:0003735; F:GO:0019843; C:GO:0015935	P:translation; F:structural constituent of ribosome; F:rRNA binding; C:small ribosomal subunit	0	1.1e-07	0	0	0.026
144	Cgl0867	rpsN	30S ribosomal protein S14	0	0	5.55	3.81	0	P:GO:0006412; F:GO:0003735; F:GO:0019843; C:GO:0005840	P:translation; F:structural constituent of ribosome; F:rRNA binding; C:ribosome	0	0	0	0	0.052
145	Cgl2026	rpsB	30S ribosomal protein S2	0	0	4.34	3.81	0	P:GO:0006412; F:GO:0003735; C:GO:0015935	P:translation; F:structural constituent of ribosome; C:small ribosomal subunit	0.48	0	0	0	9.8e-05
146	Cgl0496		elongation factor G	0	0	3.27	3.81	0	P:GO:0006414; F:GO:0003746; F:GO:0003924; F:GO:0005525; C:GO:0005737	P:translational elongation; F:translation elongation factor activity; F:GTPase activity; F:GTP binding; C:cytoplasm	0.091	6e-15	0	0	6.4e-05
147	Cgl0868	rpmG	50S ribosomal protein L33	0	0	5.87	3.8	0	P:GO:0006412; F:GO:0003735; C:GO:0005840	P:translation; F:structural constituent of ribosome; C:ribosome	0	0	0	0	0.00011
148	Cgl0516	rpmC	50S ribosomal protein L29	0	0	5.98	3.79	0	P:GO:0006412; F:GO:0003735; C:GO:0005840	P:translation; F:structural constituent of ribosome; C:ribosome	0	4.1e-16	0	0	0.085
149	Cgl0485	rplJ	50S ribosomal protein L10	0	0	5.18	3.79	0	P:GO:0006412; P:GO:0042254; F:GO:0070180; C:GO:0005840	P:translation; P:ribosome biogenesis; F:large ribosomal subunit rRNA binding; C:ribosome	0	0	0	0	1.1e-09
150	Cgl1019	glpX	fructose 1,6-bisphosphatase II	0	0	2.72	3.78	0	P:GO:0006071; P:GO:0006094; P:GO:0016311; P:GO:0030388; F:GO:0000287; F:GO:0030145; F:GO:0042132; C:GO:0005737	P:glycerol metabolic process; P:gluconeogenesis; P:dephosphorylation; P:fructose 1,6-bisphosphate metabolic process; F:magnesium ion binding; F:manganese ion binding; F:fructose 1,6-bisphosphate 1-phosphatase activity; C:cytoplasm	0.058	0.027	0	0	0.051
151	Cgl2716	groEL	chaperonin GroEL	0	0	3.1	3.77	0	P:GO:0042026; F:GO:0005524; F:GO:0051082; C:GO:0005737	P:protein refolding; F:ATP binding; F:unfolded protein binding; C:cytoplasm	0.54	0.00092	0	0	4.7e-07
152	Cgl0512		30S ribosomal protein S19	0	0	5.86	3.76	0	P:GO:0006412; F:GO:0003735; F:GO:0019843; C:GO:0015935	P:translation; F:structural constituent of ribosome; F:rRNA binding; C:small ribosomal subunit	0	9.9e-07	0	0	0.05
153	Cgl1674		copper resistance protein CopC	0	0	3.82	3.75	0	P:GO:0046688; F:GO:0005507; C:GO:0016021; C:GO:0042597	P:response to copper ion; F:copper ion binding; C:integral component of membrane; C:periplasmic space	1.4e-26	1e-10	0	0	3.4e-15
154	Cgl0189		SDR family oxidoreductase	0	0	2.71	3.72	0	F:GO:0004316; F:GO:0102131; F:GO:0102132	F:3-oxoacyl-[acyl-carrier-protein] reductase (NADPH) activity; F:3-oxo-glutaryl-[acp] methyl ester reductase activity; F:3-oxo-pimeloyl-[acp] methyl ester reductase activity	2.7e-07	0.31	0	0	2.5e-10
155	Cgl1379	rpmI	50S ribosomal protein L35	0	0	6.87	3.68	0	P:GO:0006412; F:GO:0003735; C:GO:0005840	P:translation; F:structural constituent of ribosome; C:ribosome	0	0.003	0	0	0.42
156	Cgl2004		putative secreted or membrane protein	0	0	5.83	3.67	0	C:GO:0016021	C:integral component of membrane	1	0.59	0	0	9.9e-13
157	Cgl0537	rpsH	30S ribosomal protein S8	0	0	5.09	3.67	0	P:GO:0006412; F:GO:0003735; F:GO:0019843; C:GO:0005840	P:translation; F:structural constituent of ribosome; F:rRNA binding; C:ribosome	0	0.0057	0	0	3.2e-10
158	Cgl1986		DNA-binding protein	0	0	4.07	3.67	0	F:GO:0003677	F:DNA binding	1.7e-18	0.084	0	0	0.073
159	Cgl2927	sod	Superoxide dismutase	0	0	3.4	3.66	0	P:GO:0019430; F:GO:0004784; F:GO:0046872	P:removal of superoxide radicals; F:superoxide dismutase activity; F:metal ion binding	1.2e-08	0	0	0	3.3e-07
160	Cgl0948	cgtS10	histidine kinase	0	0	3.34	3.66	0	P:GO:0000160; P:GO:0016310; F:GO:0000155; F:GO:0046983; C:GO:0016021	P:phosphorelay signal transduction system; P:phosphorylation; F:phosphorelay sensor kinase activity; F:protein dimerization activity; C:integral component of membrane	0	0.6	0	0	1.2e-13
161	Cgl1563	sufD	Fe-S cluster assembly protein SufD	0	0	3.52	3.65	0	P:GO:0016226	P:iron-sulfur cluster assembly	0	0.0012	0	0	0.0011
162	Cgl0538	rplF	50S ribosomal protein L6	0	0	5.65	3.64	0	P:GO:0006412; F:GO:0003735; F:GO:0019843; C:GO:0005840	P:translation; F:structural constituent of ribosome; F:rRNA binding; C:ribosome	0	0.0047	0	0	8.7e-10
163	Cgl1559		aromatic ring hydroxylase	0	0	2.62	3.64	0	0	0	0	0.0047	0	0	0.001
164	Cgl2197		MULTISPECIES: iron-sulfur cluster assembly accessory protein	0	0	2.99	3.63	0	P:GO:0097428; F:GO:0005198; F:GO:0051536	P:protein maturation by iron-sulfur cluster transfer; F:structural molecule activity; F:iron-sulfur cluster binding	0.0017	0.15	0	0	2.4e-07
165	Cgl0669	irp1	iron-siderophore ABC transporter substrate-binding protein	0	0	2.87	3.63	0	0	0	0.0016	0.17	0	0	0
166	Cgl0513	rplV	50S ribosomal protein L22	0	0	5.67	3.62	0	P:GO:0006412; F:GO:0003735; F:GO:0019843; C:GO:0015934	P:translation; F:structural constituent of ribosome; F:rRNA binding; C:large ribosomal subunit	0	3.9e-21	0	0	0.27
167	Cgl0319	fadH	alcohol dehydrogenase	0	0	2.5	3.62	0	F:GO:0008270; F:GO:0050607	F:zinc ion binding; F:mycothiol-dependent formaldehyde dehydrogenase activity	0.011	0.00022	0	0	0
168	Cgl0515	rplP	50S ribosomal protein L16	0	0	5.8	3.61	0	P:GO:0006412; F:GO:0000049; F:GO:0003735; F:GO:0019843; C:GO:0005840	P:translation; F:tRNA binding; F:structural constituent of ribosome; F:rRNA binding; C:ribosome	0	9.5e-13	0	0	3.4e-05
169	Cgl1540	acn	aconitate hydratase	0	0	4.09	3.61	0	P:GO:0006099; P:GO:0019679; F:GO:0003730; F:GO:0003994; F:GO:0046872; F:GO:0047456; F:GO:0047780; F:GO:0051539	P:tricarboxylic acid cycle; P:propionate metabolic process, methylcitrate cycle; F:mRNA 3'-UTR binding; F:aconitate hydratase activity; F:metal ion binding; F:2-methylisocitrate dehydratase activity; F:citrate dehydratase activity; F:4 iron, 4 sulfur cluster binding	2.5e-12	0.024	0	0	0.00021
170	Cgl0872	rpmE	50S ribosomal protein L31 type B	0	0	5.26	3.58	0	P:GO:0006412; F:GO:0003735; C:GO:0005840	P:translation; F:structural constituent of ribosome; C:ribosome	0	0	0	0	0.0011
171	Cgl2617	ddh	diaminopimelate dehydrogenase	0	0	2.29	3.56	0	P:GO:0009089; P:GO:0019877; F:GO:0000166; F:GO:0047850	P:lysine biosynthetic process via diaminopimelate; P:diaminopimelate biosynthetic process; F:nucleotide binding; F:diaminopimelate dehydrogenase activity	0.0012	0.00011	0	0	0.67
172	Cgl1560		SUF system NifU family Fe-S cluster assembly protein	0	0	3.23	3.52	0	P:GO:0016226; F:GO:0005506; F:GO:0051536	P:iron-sulfur cluster assembly; F:iron ion binding; F:iron-sulfur cluster binding	0	0.018	0	0	0.00084
173	Cgl0517	rpsQ	30S ribosomal protein S17	0	0	4.87	3.47	0	P:GO:0006412; F:GO:0003735; F:GO:0019843; C:GO:0005840	P:translation; F:structural constituent of ribosome; F:rRNA binding; C:ribosome	2.9e-13	1.5e-05	0	0	0.47
174	Cgl2564		Predicted acetyltransferase	0	0	2.61	3.44	0	F:GO:0016740	F:transferase activity	0.00026	0	0	0	4.9e-12
175	Cgl0518		30S ribosomal protein S17	0	0	4.85	3.43	0	P:GO:0006412; F:GO:0003735; F:GO:0019843; C:GO:0005840	P:translation; F:structural constituent of ribosome; F:rRNA binding; C:ribosome	2.5e-12	3.9e-05	0	0	0.42
176	Cgl0562	rpsK	30S ribosomal protein S11	0	0	5.42	3.42	0	P:GO:0006412; F:GO:0003735; F:GO:0019843; C:GO:0005840	P:translation; F:structural constituent of ribosome; F:rRNA binding; C:ribosome	0	2e-17	0	0	1.4e-06
177	Cgl1565		transcriptional regulator	0	0	3.78	3.42	0	P:GO:0006355; F:GO:0003700	P:regulation of transcription, DNA-templated; F:DNA-binding transcription factor activity	0	0.44	0	0	7.1e-12
178	Cgl1345		putative secreted protein	0	0	2.34	3.42	0	0	0	2.5e-06	0.053	0	0	0.0027
179	Cgl1663		YebC/PmpR family DNA-binding transcriptional regulator	0	0	3.41	3.41	0	P:GO:0006355; F:GO:0003677; C:GO:0005737	P:regulation of transcription, DNA-templated; F:DNA binding; C:cytoplasm	1.4e-07	7.3e-05	0	0	0.0021
180	Cgl2814	cysN	sulfate adenylyltransferase	0	0	2.2	3.41	0	P:GO:0006790; F:GO:0003924; F:GO:0004781; F:GO:0005524; F:GO:0005525	P:sulfur compound metabolic process; F:GTPase activity; F:sulfate adenylyltransferase (ATP) activity; F:ATP binding; F:GTP binding	0	0.00064	0	0	0.082
181	Cgl2983	rpsF	30S ribosomal protein S6	0	0	4.22	3.4	0	P:GO:0006412; F:GO:0003735; F:GO:0019843; C:GO:0005840	P:translation; F:structural constituent of ribosome; F:rRNA binding; C:ribosome	0.00013	3.6e-09	0	0	1.1e-05
182	Cgl0229		CsbD family protein	0	0	3.35	3.35	0	0	0	5.7e-09	0.63	0	0	0
183	Cgl1615		YbjN domain-containing protein	0	0	2.86	3.35	0	0	0	0.66	0.044	0	0	0.067
184	Cgl0889		alpha-amylase	0	0	2.57	3.35	0	P:GO:0005975; F:GO:0047798	P:carbohydrate metabolic process; F:cyclomaltodextrinase activity	0.39	0.8	0	0	7.7e-08
185	Cgl0540	rpsE	30S ribosomal protein S5	0	0	4.84	3.31	0	P:GO:0006412; F:GO:0003735; F:GO:0019843; C:GO:0015935	P:translation; F:structural constituent of ribosome; F:rRNA binding; C:small ribosomal subunit	7.9e-08	0.024	0	0	1.3e-05
186	Cgl0815		DUF3239 domain-containing protein	0	0	2.75	3.31	0	C:GO:0016021	C:integral component of membrane	1.3e-06	0.27	0	0	0.45
187	Cgl1380	rplT	50S ribosomal protein L20	0	0	6.06	3.26	0	P:GO:0000027; P:GO:0006412; F:GO:0003735; F:GO:0019843; C:GO:0005840	P:ribosomal large subunit assembly; P:translation; F:structural constituent of ribosome; F:rRNA binding; C:ribosome	8.2e-06	0.0054	0	0	0.64
188	Cgl2343	rpsT	30S ribosomal protein S20	0	0	4.98	3.24	0	P:GO:0006412; F:GO:0003735; F:GO:0019843; C:GO:0005840	P:translation; F:structural constituent of ribosome; F:rRNA binding; C:ribosome	1e-08	0	0	0	8.1e-05
189	Cgl3010		VanZ family protein	0	0	3.96	3.24	0	C:GO:0016021	C:integral component of membrane	0.27	0.41	0	0	1.1e-05
190	Cgl0493	rpsL	30S ribosomal protein S12	0	0	5.53	3.22	0	P:GO:0006412; F:GO:0000049; F:GO:0003735; F:GO:0019843; C:GO:0015935	P:translation; F:tRNA binding; F:structural constituent of ribosome; F:rRNA binding; C:small ribosomal subunit	0	0.024	0	0	0.017
191	Cgl0522	rplX	50S ribosomal protein L24	0	0	5.46	3.22	0	P:GO:0006412; F:GO:0003735; F:GO:0019843; C:GO:0005840	P:translation; F:structural constituent of ribosome; F:rRNA binding; C:ribosome	0	2e-07	0	0	0.051
192	Cgl2362	rpmA	50S ribosomal protein L27	0	0	4.07	3.22	0	P:GO:0006412; F:GO:0003735; C:GO:0005840	P:translation; F:structural constituent of ribosome; C:ribosome	3.1e-05	0.04	0	0	0.0011
193	Cgl0442	ccsB	c-type cytochrome biogenesis protein CcsB	0	0	2.58	3.22	0	P:GO:0017004; F:GO:0020037; C:GO:0016021	P:cytochrome complex assembly; F:heme binding; C:integral component of membrane	0.0001	0.16	0	0	0.0032
194	Cgl0543		30S ribosomal protein S5	0	0	4.85	3.21	0	P:GO:0006412; F:GO:0003735; F:GO:0019843; C:GO:0015934; C:GO:0015935	P:translation; F:structural constituent of ribosome; F:rRNA binding; C:large ribosomal subunit; C:small ribosomal subunit	0.0002	0.0019	0	0	0.00012
195	Cgl1426		RluA family pseudouridine synthase	0	0	3.61	3.19	0	P:GO:0001522; F:GO:0003723; F:GO:0009982; F:GO:0016829	P:pseudouridine synthesis; F:RNA binding; F:pseudouridine synthase activity; F:lyase activity	2.3e-05	8.8e-07	0	0	1.1e-11
196	Cgl1344		MULTISPECIES: hypothetical protein	0	0	3.13	3.18	0	0	0	0.0035	0.18	0	0	0.0003
197	Cgl1248		siderophore-interacting protein	0	0	2.54	3.17	0	F:GO:0016491	F:oxidoreductase activity	3e-05	0.035	0	0	0.0069
198	Cgl0564	rpoA	DNA-directed RNA polymerase subunit alpha	0	0	5.23	3.16	0	P:GO:0006351; F:GO:0003677; F:GO:0003899; F:GO:0046983	P:transcription, DNA-templated; F:DNA binding; F:DNA-directed 5'-3' RNA polymerase activity; F:protein dimerization activity	0	0.0038	0	0	6.8e-05
199	Cgl0523	rplE	50S ribosomal protein L5	0	0	5.44	3.15	0	P:GO:0006412; F:GO:0000049; F:GO:0003735; F:GO:0019843; C:GO:0005840	P:translation; F:tRNA binding; F:structural constituent of ribosome; F:rRNA binding; C:ribosome	0	0.018	0	0	0.00045
200	Cgl0563	rpsD	30S ribosomal protein S4	0	0	6.1	3.12	0	P:GO:0006412; F:GO:0003735; F:GO:0019843; C:GO:0015935	P:translation; F:structural constituent of ribosome; F:rRNA binding; C:small ribosomal subunit	0	2e-19	0	0	3.2e-05
201	Cgl1985	infB	translation initiation factor IF-2	0	0	3.6	3.11	0	P:GO:0006413; F:GO:0003743; F:GO:0003924; F:GO:0005525; C:GO:0005737	P:translational initiation; F:translation initiation factor activity; F:GTPase activity; F:GTP binding; C:cytoplasm	5.1e-09	0.052	0	0	1
202	Cgl2976	trxB1	thioredoxin	0	0	3.42	3.11	0	P:GO:0006662; P:GO:0045454; F:GO:0015035; F:GO:0016853	P:glycerol ether metabolic process; P:cell redox homeostasis; F:protein disulfide oxidoreductase activity; F:isomerase activity	0.53	0.74	0	0	4.5e-10
203	Cgl0565		Hypothetical protein	0	0	6.48	3.1	0	0	0	0	2.5e-05	0	0	1.6e-08
204	Cgl0514	rpsC	30S ribosomal protein S3	0	0	5.09	3.09	0	P:GO:0006412; F:GO:0003729; F:GO:0003735; F:GO:0019843; C:GO:0005840	P:translation; F:mRNA binding; F:structural constituent of ribosome; F:rRNA binding; C:ribosome	0	0.00041	0	0	0.3
205	Cgl0819		resuscitation-promoting factor Rpf1	0	0	3.4	3.08	0	F:GO:0016787; C:GO:0005576; C:GO:0009986	F:hydrolase activity; C:extracellular region; C:cell surface	0.84	1.5e-08	0	0	0.0018
206	Cgl1970		ribonuclease J	0	0	2.37	3.07	0	P:GO:0006364; P:GO:0090502; P:GO:0090503; F:GO:0003723; F:GO:0004521; F:GO:0004534; F:GO:0008270; C:GO:0005737	P:rRNA processing; P:RNA phosphodiester bond hydrolysis, endonucleolytic; P:RNA phosphodiester bond hydrolysis, exonucleolytic; F:RNA binding; F:endoribonuclease activity; F:5'-3' exoribonuclease activity; F:zinc ion binding; C:cytoplasm	0.32	0.79	0	0	4.4e-06
207	Cgl2267		MULTISPECIES: hypothetical protein	0	0	2.29	3.07	0	0	0	0.75	0.37	0	0	0.00018
208	Cgl1561	nifS2	cysteine desulfurase	0	0	3.56	3.06	0	P:GO:0006534; F:GO:0016829; F:GO:0030170; F:GO:0031071	P:cysteine metabolic process; F:lyase activity; F:pyridoxal phosphate binding; F:cysteine desulfurase activity	0	0.56	0	0	7.3e-05
209	Cgl2878	cmt2	esterase family protein	0	0	3.2	3.05	0	0	0	4.2e-13	7.2e-05	0	0	1.1e-07
210	Cgl0573	cma	cyclopropane-fatty-acyl-phospholipid synthase	0	0	2.72	3.05	0	P:GO:0008610; P:GO:0032259; F:GO:0008825	P:lipid biosynthetic process; P:methylation; F:cyclopropane-fatty-acyl-phospholipid synthase activity	0.25	0.14	0	0	0.065
211	Cgl2342		type II toxin-antitoxin system PemK/MazF family toxin	0	0	2.58	3.05	0	F:GO:0003677; F:GO:0003963	F:DNA binding; F:RNA-3'-phosphate cyclase activity	0.047	0.024	0	0	0.86
212	Cgl1562	sufC	ABC transporter ATP-binding protein	0	0	3.48	3.04	0	F:GO:0005524	F:ATP binding	0	0.93	0	0	0.00056
213	Cgl2874		putative secreted protein	0	0	2.8	3.04	0	0	0	1.8e-07	0.22	0	0	9.4e-06
214	Cgl0510	rplB	50S ribosomal protein L2	0	0	5.54	3.02	0	P:GO:0006412; F:GO:0003735; F:GO:0016740; F:GO:0019843; C:GO:0015934	P:translation; F:structural constituent of ribosome; F:transferase activity; F:rRNA binding; C:large ribosomal subunit	0	1.6e-14	0	0	0.74
215	Cgl0507	rplD	50S ribosomal protein L4	0	0	5.79	3.01	0	P:GO:0006412; F:GO:0003735; F:GO:0019843; C:GO:0005840	P:translation; F:structural constituent of ribosome; F:rRNA binding; C:ribosome	0	2.6e-07	0	0	0.46
216	Cgl0027		ABC transporter substrate-binding protein	0	0	4.5	3.01	0	P:GO:0007155; P:GO:0030001; F:GO:0046872	P:cell adhesion; P:metal ion transport; F:metal ion binding	1	0.0014	0	0	0.14
217	Cgl0541	rpmD	50S ribosomal protein L30	0	0	4.84	2.99	0	P:GO:0006412; F:GO:0003735; C:GO:0015934	P:translation; F:structural constituent of ribosome; C:large ribosomal subunit	0.026	0.00019	0	0	4.7e-05
218	Cgl2125	treZ	malto-oligosyltrehalose trehalohydrolase	0	0	2.42	2.99	0	P:GO:0005992; F:GO:0033942; C:GO:0005737	P:trehalose biosynthetic process; F:4-alpha-D-(1->4)-alpha-D-glucanotrehalose trehalohydrolase activity; C:cytoplasm	6.8e-06	0.68	0	0	0.003
219	Cgl0489	rpoC	DNA-directed RNA polymerase subunit beta'	0	0	3.74	2.98	0	P:GO:0006351; F:GO:0000287; F:GO:0003677; F:GO:0003899; F:GO:0008270	P:transcription, DNA-templated; F:magnesium ion binding; F:DNA binding; F:DNA-directed 5'-3' RNA polymerase activity; F:zinc ion binding	1.2e-07	0.12	0	0	0.05
220	Cgl0878		hypothetical protein	0	0	2.88	2.95	0	0	0	9.3e-15	0.98	0	0	1.7e-05
221	Cgl0026		putative secreted protein	0	0	3.86	2.94	0	0	0	1	0.026	0	0	0.0016
222	Cgl0829	gltA	citrate synthase	0	0	3.74	2.94	0	P:GO:0006099; F:GO:0004108; C:GO:0005737	P:tricarboxylic acid cycle; F:citrate (Si)-synthase activity; C:cytoplasm	1.1e-27	2.4e-13	0	0	0.01
223	Cgl1962		transcriptional regulator	0	0	2.23	2.94	0	F:GO:0003677	F:DNA binding	5.8e-09	0.0085	0	0	0.0023
224	Cgl2981	rplI	50S ribosomal protein L9	0	0	4.48	2.92	0	P:GO:0006412; F:GO:0003735; F:GO:0019843; C:GO:0005840	P:translation; F:structural constituent of ribosome; F:rRNA binding; C:ribosome	8.7e-09	0	0	0	0.086
225	Cgl2025	tsf	elongation factor Ts	0	0	2.67	2.91	0	P:GO:0006414; F:GO:0003746; C:GO:0005737	P:translational elongation; F:translation elongation factor activity; C:cytoplasm	0.56	0.019	0	0	7.1e-05
226	Cgl0773		DUF3152 domain-containing protein	0	0	2.51	2.91	0	C:GO:0016021	C:integral component of membrane	0.00014	0.0023	0	0	0.00011
227	Cgl1575	tal	transaldolase	0	0	2.34	2.88	0	P:GO:0005975; P:GO:0006098; F:GO:0004801; C:GO:0005737	P:carbohydrate metabolic process; P:pentose-phosphate shunt; F:sedoheptulose-7-phosphate:D-glyceraldehyde-3-phosphate glyceronetransferase activity; C:cytoplasm	4.3e-05	0.45	0	0	4.8e-07
228	Cgl3099	rpmH	50S ribosomal protein L34	0	0	4.55	2.86	0	P:GO:0006412; F:GO:0003735; C:GO:0005840	P:translation; F:structural constituent of ribosome; C:ribosome	0.017	0	0	0	0.0067
229	Cgl2361		50S ribosomal protein L27	0	0	3.95	2.86	0	P:GO:0006412; F:GO:0003735; C:GO:0005840	P:translation; F:structural constituent of ribosome; C:ribosome	0.00019	0.066	0	0	0.0041
230	Cgl0566	rplQ	50S ribosomal protein L17	0	0	4.61	2.83	0	P:GO:0006412; F:GO:0003735; C:GO:0005840	P:translation; F:structural constituent of ribosome; C:ribosome	1.6e-10	6.4e-09	0	0	0.00027
231	Cgl1183	hom	homoserine dehydrogenase	0	0	2.18	2.82	0	P:GO:0009086; P:GO:0009088; P:GO:0009097; F:GO:0004412; F:GO:0050661	P:methionine biosynthetic process; P:threonine biosynthetic process; P:isoleucine biosynthetic process; F:homoserine dehydrogenase activity; F:NADP binding	6.4e-18	0.71	0	0	0.00034
232	Cgl0521	rplN	50S ribosomal protein L14	0	0	5.98	2.81	0	P:GO:0006412; F:GO:0003735; F:GO:0019843; C:GO:0015934	P:translation; F:structural constituent of ribosome; F:rRNA binding; C:large ribosomal subunit	0	7.1e-11	0	0	0.02
233	Cgl0703		DUF3151 domain-containing protein	0	0	2.57	2.81	0	0	0	1.2e-08	0.27	0	0	0.00019
234	Cgl0509		50S ribosomal protein L23	0	0	6.03	2.8	0	P:GO:0006412; F:GO:0003735; F:GO:0019843; C:GO:0005840	P:translation; F:structural constituent of ribosome; F:rRNA binding; C:ribosome	0	1.4e-17	0	0	0.77
235	Cgl2982	ssb	single-stranded DNA-binding protein	0	0	4.28	2.8	0	P:GO:0006260; F:GO:0003697	P:DNA replication; F:single-stranded DNA binding	2.8e-21	0.36	0	0	0.059
236	Cgl0508	rplW	50S ribosomal protein L23	0	0	6.04	2.79	0	P:GO:0006412; F:GO:0003735; F:GO:0019843; C:GO:0005840	P:translation; F:structural constituent of ribosome; F:rRNA binding; C:ribosome	0	3.7e-18	0	0	0.72
237	Cgl1671	thrS	threonine--tRNA ligase	0	0	3.65	2.79	0	P:GO:0006435; F:GO:0000049; F:GO:0004829; F:GO:0005524; F:GO:0046872; C:GO:0005737	P:threonyl-tRNA aminoacylation; F:tRNA binding; F:threonine-tRNA ligase activity; F:ATP binding; F:metal ion binding; C:cytoplasm	1e-08	0.00024	0	0	0.38
238	Cgl0581	rplM	50S ribosomal protein L13	0	0	4.65	2.76	0	P:GO:0006412; F:GO:0003735; C:GO:0005840	P:translation; F:structural constituent of ribosome; C:ribosome	1.7e-05	1.9e-26	0	0	0.023
239	Cgl1213	atpC	F0F1 ATP synthase subunit epsilon	0	0	2.85	2.76	0	P:GO:0015986; F:GO:0005524; F:GO:0016787; F:GO:0046933; C:GO:0005886; C:GO:0045261	P:ATP synthesis coupled proton transport; F:ATP binding; F:hydrolase activity; F:proton-transporting ATP synthase activity, rotational mechanism; C:plasma membrane; C:proton-transporting ATP synthase complex, catalytic core F(1)	1.2e-14	2.2e-13	0	0	2.7e-15
240	Cgl3092	cwlM	N-acetylmuramoyl-L-alanine amidase	0	0	2.67	2.76	0	P:GO:0009253; F:GO:0008745	P:peptidoglycan catabolic process; F:N-acetylmuramoyl-L-alanine amidase activity	7.4e-08	0.5	0	0	0.025
241	Cgl1400	argG	argininosuccinate synthase	0	0	2.08	2.75	0	P:GO:0006526; F:GO:0004055; F:GO:0005524; C:GO:0005737	P:arginine biosynthetic process; F:argininosuccinate synthase activity; F:ATP binding; C:cytoplasm	0.00083	9.1e-14	0	0	0.00056
242	Cgl0556	adk	adenylate kinase	0	0	2.74	2.73	0	P:GO:0016310; P:GO:0044209; P:GO:0046940; F:GO:0004017; F:GO:0005524; C:GO:0005737	P:phosphorylation; P:AMP salvage; P:nucleoside monophosphate phosphorylation; F:adenylate kinase activity; F:ATP binding; C:cytoplasm	0.068	6.7e-05	0	0	0.022
243	Cgl1308	glgP1	glycogen phosphorylase	0	0	2.76	2.7	0	P:GO:0005975; F:GO:0008184; F:GO:0030170; F:GO:0102250; F:GO:0102499	P:carbohydrate metabolic process; F:glycogen phosphorylase activity; F:pyridoxal phosphate binding; F:linear malto-oligosaccharide phosphorylase activity; F:SHG alpha-glucan phosphorylase activity	0.63	2.9e-08	0	0	0.13
244	Cgl2875	cop1	protein PS1	0	0	2.76	2.7	0	F:GO:0016740; C:GO:0005576	F:transferase activity; C:extracellular region	0.014	4.5e-11	0	0	9.6e-06
245	Cgl0056		cytoplasmic protein	0	0	2.5	2.7	0	P:GO:0006355; F:GO:0003677; F:GO:0046872	P:regulation of transcription, DNA-templated; F:DNA binding; F:metal ion binding	0.38	0.8	0	0	6.5e-06
246	Cgl0653	metY	cystathionine gamma-synthase	0	0	2.62	2.68	0	P:GO:0019346; P:GO:0071266; F:GO:0003961; F:GO:0030170	P:transsulfuration; P:'de novo' L-methionine biosynthetic process; F:O-acetylhomoserine aminocarboxypropyltransferase activity; F:pyridoxal phosphate binding	2.6e-12	1.2e-14	0	0	0.077
247	Cgl2363	rplU	50S ribosomal protein L21	0	0	4.4	2.67	0	P:GO:0006412; F:GO:0003735; F:GO:0019843; C:GO:0005840	P:translation; F:structural constituent of ribosome; F:rRNA binding; C:ribosome	0.46	0	0	0	3e-07
248	Cgl1428		ribosome biogenesis GTPase Der	0	0	3.28	2.66	0	P:GO:0042254; F:GO:0005525	P:ribosome biogenesis; F:GTP binding	0.31	0.14	0	0	1.7e-14
249	Cgl2446	metB	cystathionine gamma-synthase	0	0	2.69	2.66	0	P:GO:0009086; P:GO:0019346; F:GO:0003962; F:GO:0016829; F:GO:0030170; F:GO:0102028	P:methionine biosynthetic process; P:transsulfuration; F:cystathionine gamma-synthase activity; F:lyase activity; F:pyridoxal phosphate binding; F:cystathionine gamma-synthase activity (acts on O-phosphohomoserine)	2.5e-24	0.77	0	0	0.29
250	Cgl0842		glutaredoxin NrdH	0	0	2.45	2.66	0	P:GO:0022900; P:GO:0046685; F:GO:0009055; F:GO:0015035; C:GO:0005737	P:electron transport chain; P:response to arsenic-containing substance; F:electron transfer activity; F:protein disulfide oxidoreductase activity; C:cytoplasm	0.2	0.019	0	0	3.8e-08
251	Cgl1359	rpsA	30S ribosomal protein S1	0	0	6.2	2.65	0	F:GO:0003676; C:GO:0005840	F:nucleic acid binding; C:ribosome	0	0.19	0	0	1.5e-06
252	Cgl0557		adenylate kinase	0	0	2.66	2.65	0	P:GO:0016310; P:GO:0044209; P:GO:0046940; F:GO:0004017; F:GO:0005524; C:GO:0005737	P:phosphorylation; P:AMP salvage; P:nucleoside monophosphate phosphorylation; F:adenylate kinase activity; F:ATP binding; C:cytoplasm	0.082	0.00015	0	0	0.027
253	Cgl0291		Crp/Fnr family transcriptional regulator	0	0	2.32	2.65	0	P:GO:0016310; P:GO:0045892; P:GO:0045893; P:GO:2000874; F:GO:0000976; F:GO:0001216; F:GO:0001217; F:GO:0016301; F:GO:0030552; C:GO:0032993	P:phosphorylation; P:negative regulation of transcription, DNA-templated; P:positive regulation of transcription, DNA-templated; P:regulation of glyoxylate cycle; F:transcription regulatory region sequence-specific DNA binding; F:DNA-binding transcription activator activity; F:DNA-binding transcription repressor activity; F:kinase activity; F:cAMP binding; C:protein-DNA complex	2.5e-08	0.84	0	0	0.46
254	Cgl2040	thiS	sulfur carrier protein ThiS	0	0	2.6	2.64	0	0	0	0.92	0.0078	0	0	0.012
255	Cgl1120	sigE	RNA polymerase sigma factor SigE	0	0	2.1	2.62	0	P:GO:2000142; F:GO:0003677; F:GO:0003899; F:GO:0016987	P:regulation of DNA-templated transcription, initiation; F:DNA binding; F:DNA-directed 5'-3' RNA polymerase activity; F:sigma factor activity	0.0047	0.27	0	0	1.3e-13
256	Cgl0582	rpsI	30S ribosomal protein S9	0	0	4.9	2.61	0	P:GO:0006412; F:GO:0003735; C:GO:0005840	P:translation; F:structural constituent of ribosome; C:ribosome	2.4e-17	0	0	0	0.0021
257	Cgl0486	rplL	50S ribosomal protein L7/L12	0	0	2.79	2.6	0	P:GO:0006412; F:GO:0003735; C:GO:0005840	P:translation; F:structural constituent of ribosome; C:ribosome	0.00028	0.41	0	0	0.0013
258	Cgl0844	thyA	thymidylate synthase	0	0	2.58	2.6	0	P:GO:0006231; P:GO:0006235; P:GO:0032259; F:GO:0004799; C:GO:0005737	P:dTMP biosynthetic process; P:dTTP biosynthetic process; P:methylation; F:thymidylate synthase activity; C:cytoplasm	0.0017	0.95	0	0	0.25
259	Cgl2579		fatty acid-binding protein	0	0	3.37	2.59	0	P:GO:0046907	P:intracellular transport	0.014	2.1e-10	0	0	0.11
260	Cgl1273	ilvC	ketol-acid reductoisomerase	0	0	2.33	2.59	0	P:GO:0009097; P:GO:0009099; F:GO:0000287; F:GO:0004455; F:GO:0008677; F:GO:0016853; F:GO:0050661	P:isoleucine biosynthetic process; P:valine biosynthetic process; F:magnesium ion binding; F:ketol-acid reductoisomerase activity; F:2-dehydropantoate 2-reductase activity; F:isomerase activity; F:NADP binding	2.4e-09	4.7e-16	0	0	0.045
261	Cgl3091	trxC	thioredoxin	0	0	2.78	2.58	0	P:GO:0006662; P:GO:0045454; F:GO:0015035; F:GO:0016853	P:glycerol ether metabolic process; P:cell redox homeostasis; F:protein disulfide oxidoreductase activity; F:isomerase activity	0.032	0.68	0	0	5.8e-05
262	Cgl0828	serC	phosphoserine aminotransferase	0	0	3.37	2.57	0	P:GO:0006564; P:GO:0008615; F:GO:0004648; F:GO:0030170; C:GO:0005737	P:L-serine biosynthetic process; P:pyridoxine biosynthetic process; F:O-phospho-L-serine:2-oxoglutarate aminotransferase activity; F:pyridoxal phosphate binding; C:cytoplasm	2.9e-06	4.2e-09	0	0	0.0083
263	Cgl0688	lpdA	dihydrolipoyl dehydrogenase	0	0	3.25	2.56	0	P:GO:0045454; F:GO:0016491; F:GO:0050660	P:cell redox homeostasis; F:oxidoreductase activity; F:flavin adenine dinucleotide binding	0.75	1.6e-06	0	0	4e-05
264	Cgl1443		bifunctional nuclease family protein	0	0	2.63	2.56	0	P:GO:0090305; F:GO:0004518	P:nucleic acid phosphodiester bond hydrolysis; F:nuclease activity	0.068	1	0	0	0.35
265	Cgl0637		methionine ABC transporter substrate-binding protein	0	0	2.72	2.55	0	C:GO:0016020	C:membrane	1.6e-16	7.7e-11	0	0	0.046
266	Cgl0251	lysC	aspartate kinase	0	0	2.5	2.55	0	P:GO:0009088; P:GO:0009089; P:GO:0016310; P:GO:0019877; F:GO:0004072; F:GO:0005524	P:threonine biosynthetic process; P:lysine biosynthetic process via diaminopimelate; P:phosphorylation; P:diaminopimelate biosynthetic process; F:aspartate kinase activity; F:ATP binding	0.22	0.0012	0	0	0.0038
267	Cgl2133		cation transporter	0	0	2.74	2.54	0	P:GO:0098655; F:GO:0008324; C:GO:0016021	P:cation transmembrane transport; F:cation transmembrane transporter activity; C:integral component of membrane	0.5	0.69	0	0	0.0011
268	Cgl1123	mrp	sodium:proton antiporter	0	0	2.07	2.52	0	F:GO:0005524; F:GO:0016887; F:GO:0046872; F:GO:0051536	F:ATP binding; F:ATPase activity; F:metal ion binding; F:iron-sulfur cluster binding	0.0084	0.93	0	0	0.061
269	Cgl0413		---NA---	0	0	4.25	2.51	0	0	0	5.3e-05	0.0021	0	0	0
270	Cgl0960		MULTISPECIES: hypothetical protein	0	0	3.6	2.5	0	0	0	0.91	0.032	0	0	0.52
271	Cgl0561	rpsM	30S ribosomal protein S13	0	0	4.86	2.49	0	P:GO:0006412; F:GO:0000049; F:GO:0003735; F:GO:0019843; C:GO:0005840	P:translation; F:tRNA binding; F:structural constituent of ribosome; F:rRNA binding; C:ribosome	0	0.47	0	0	4e-07
272	Cgl0494	rpsG	30S ribosomal protein S7	0	0	4.54	2.49	0	P:GO:0006412; F:GO:0000049; F:GO:0003735; F:GO:0019843; C:GO:0015935	P:translation; F:tRNA binding; F:structural constituent of ribosome; F:rRNA binding; C:small ribosomal subunit	2.8e-23	9.3e-08	0	0	0.17
273	Cgl1230	fixA	electron transfer flavoprotein subunit beta	0	0	2.14	2.49	0	P:GO:0022900; F:GO:0009055	P:electron transport chain; F:electron transfer activity	0.072	0.86	0	0	0.085
274	Cgl2529		sodium:proton exchanger	0	0	3.34	2.47	0	P:GO:0055085; C:GO:0016021	P:transmembrane transport; C:integral component of membrane	0.67	0.1	0	0	0.0005
275	Cgl1465		NADH dehydrogenase	0	0	2.71	2.45	0	F:GO:0003954; C:GO:0016021	F:NADH dehydrogenase activity; C:integral component of membrane	0.044	0	0	0	0.025
276	Cgl0412		Hypothetical protein	0	0	2.23	2.45	0	0	0	0.29	7.1e-06	0	0	0.0041
277	Cgl1605		DNA-directed RNA polymerase subunit omega	0	0	3.22	2.44	0	P:GO:0006351; F:GO:0003677; F:GO:0003899	P:transcription, DNA-templated; F:DNA binding; F:DNA-directed 5'-3' RNA polymerase activity	2.5e-13	0.14	0	0	0.00016
278	Cgl0505	rplC	50S ribosomal protein L3	0	0	5.74	2.41	0	P:GO:0006412; F:GO:0003735; F:GO:0019843; C:GO:0005840	P:translation; F:structural constituent of ribosome; F:rRNA binding; C:ribosome	0	0.0094	0	0	0.023
279	Cgl2167	mraZ	cell division protein MraZ	0	0	3.21	2.41	0	P:GO:0006355; P:GO:0051301; F:GO:0003677; F:GO:0003700; C:GO:0005737; C:GO:0009295	P:regulation of transcription, DNA-templated; P:cell division; F:DNA binding; F:DNA-binding transcription factor activity; C:cytoplasm; C:nucleoid	0.56	0.014	0	0	0.00029
280	Cgl0820		cold-shock protein	0	0	3.73	2.4	0	F:GO:0003676	F:nucleic acid binding	0.18	6.1e-12	0	0	1
281	Cgl2042	thiF	thiamine biosynthesis protein ThiF	0	0	2.63	2.38	0	F:GO:0005524; F:GO:0008641; F:GO:0016779	F:ATP binding; F:ubiquitin-like modifier activating enzyme activity; F:nucleotidyltransferase activity	0.91	0.18	0	0	0.53
282	Cgl0506		50S ribosomal protein L3	0	0	5.74	2.37	0	P:GO:0006412; F:GO:0003735; F:GO:0019843; C:GO:0005840	P:translation; F:structural constituent of ribosome; F:rRNA binding; C:ribosome	0	0.0095	0	0	0.013
283	Cgl2297	malQ	4-alpha-glucanotransferase	0	0	2.12	2.37	0	P:GO:0005977; F:GO:0004134; F:GO:0102500	P:glycogen metabolic process; F:4-alpha-glucanotransferase activity; F:beta-maltose 4-alpha-glucanotransferase activity	0.11	0.0025	0	0	4.3e-05
284	Cgl1618	nusB	transcription antitermination factor NusB	0	0	2.63	2.36	0	P:GO:0006355; P:GO:0031564; F:GO:0003723	P:regulation of transcription, DNA-templated; P:transcription antitermination; F:RNA binding	0.08	0.4	0	0	0.035
285	Cgl1975		polyribonucleotide nucleotidyltransferase	0	0	2.43	2.36	0	P:GO:0006396; P:GO:0006402; F:GO:0000287; F:GO:0003723; F:GO:0004654; C:GO:0005737	P:RNA processing; P:mRNA catabolic process; F:magnesium ion binding; F:RNA binding; F:polyribonucleotide nucleotidyltransferase activity; C:cytoplasm	0.04	7e-05	0	0	0.0074
286	Cgl1652		putative membrane protein	0	0	2.95	2.35	0	F:GO:0047134; C:GO:0016021	F:protein-disulfide reductase activity; C:integral component of membrane	1	8.1e-07	0	0	0.13
287	Cgl0372	sdhB	succinate dehydrogenase	0	0	3.21	2.31	0	P:GO:0006099; P:GO:0022900; F:GO:0008177; F:GO:0009055; F:GO:0046872; F:GO:0051537; F:GO:0051538; F:GO:0051539	P:tricarboxylic acid cycle; P:electron transport chain; F:succinate dehydrogenase (ubiquinone) activity; F:electron transfer activity; F:metal ion binding; F:2 iron, 2 sulfur cluster binding; F:3 iron, 4 sulfur cluster binding; F:4 iron, 4 sulfur cluster binding	1.1e-05	0.0027	0	0	0.001
288	Cgl2948		NYN domain-containing protein	0	0	2.71	2.31	0	0	0	0.0065	0.76	0	0	0.023
289	Cgl2489	bcp	thioredoxin-dependent thiol peroxidase	0	0	2.52	2.31	0	P:GO:0098869; F:GO:0004601; F:GO:0051920	P:cellular oxidant detoxification; F:peroxidase activity; F:peroxiredoxin activity	0.0011	0.6	0	0	0.0015
290	Cgl0987		DUF4307 domain-containing protein	0	0	2.1	2.3	0	C:GO:0016021	C:integral component of membrane	0.34	0.96	0	0	0.18
291	Cgl2996		myo-inositol-1-phosphate synthase	0	0	3.83	2.27	0	P:GO:0006021; P:GO:0008654; F:GO:0004512	P:inositol biosynthetic process; P:phospholipid biosynthetic process; F:inositol-3-phosphate synthase activity	0	5.7e-14	0	0	0.16
292	Cgl2278	glyS	glycine--tRNA ligase	0	0	3.68	2.27	0	P:GO:0006426; F:GO:0004820; F:GO:0005524; F:GO:0046983; C:GO:0005737	P:glycyl-tRNA aminoacylation; F:glycine-tRNA ligase activity; F:ATP binding; F:protein dimerization activity; C:cytoplasm	0.57	0.0015	0	0	0.029
293	Cgl0174	cspA	cold-shock protein	0	0	3.11	2.27	0	F:GO:0003676; C:GO:0005737	F:nucleic acid binding; C:cytoplasm	0.068	0.023	0	0	9.7e-06
294	Cgl0371	sdhA	succinate dehydrogenase flavoprotein subunit	0	0	3.46	2.24	0	F:GO:0008177	F:succinate dehydrogenase (ubiquinone) activity	2.8e-06	0.033	0	0	0.028
295	Cgl1573	ctaB	protoheme IX farnesyltransferase	0	0	3.06	2.24	0	P:GO:0048034; F:GO:0008495; C:GO:0005886; C:GO:0016021	P:heme O biosynthetic process; F:protoheme IX farnesyltransferase activity; C:plasma membrane; C:integral component of membrane	8.9e-15	0.00027	0	0	1
296	Cgl2001	mqo	malate:quinone oxidoreductase	0	0	3.62	2.19	0	P:GO:0006099; F:GO:0008924; F:GO:0052589; C:GO:0005886	P:tricarboxylic acid cycle; F:malate dehydrogenase (quinone) activity; F:malate dehydrogenase (menaquinone) activity; C:plasma membrane	0.25	2.5e-05	0	0	0.6
297	Cgl0504	rpsJ	30S ribosomal protein S10	0	0	5.93	2.18	0	P:GO:0006412; F:GO:0000049; F:GO:0003735; C:GO:0005840	P:translation; F:tRNA binding; F:structural constituent of ribosome; C:ribosome	0	0.0064	0	0	5.6e-06
298	Cgl1911	sigA	RNA polymerase sigma factor	0	0	2.43	2.16	0	P:GO:0001123; P:GO:2000142; F:GO:0003677; F:GO:0003899; F:GO:0016987; C:GO:0005737	P:transcription initiation from bacterial-type RNA polymerase promoter; P:regulation of DNA-templated transcription, initiation; F:DNA binding; F:DNA-directed 5'-3' RNA polymerase activity; F:sigma factor activity; C:cytoplasm	3e-06	0.52	0	0	0.32
299	Cgl0707	dtsR2	methylmalonyl-CoA carboxyltransferase	0	0	2.87	2.15	0	F:GO:0004658; F:GO:0016740; C:GO:0016021	F:propionyl-CoA carboxylase activity; F:transferase activity; C:integral component of membrane	3.5e-08	0.0054	0	0	1
300	Cgl2540	pknE	DsbA family protein	0	0	2.42	2.15	0	C:GO:0016021	C:integral component of membrane	0.22	0.00041	0	0	0.18
301	Cgl2528		transcriptional regulator	0	0	2.46	2.13	0	P:GO:0006355; F:GO:0003677; F:GO:0003700; F:GO:0046914; F:GO:0046983; C:GO:0005737	P:regulation of transcription, DNA-templated; F:DNA binding; F:DNA-binding transcription factor activity; F:transition metal ion binding; F:protein dimerization activity; C:cytoplasm	0.61	0.065	0	0	0.0048
302	Cgl2991		antibiotic biosynthesis monooxygenase	0	0	2.13	2.13	0	F:GO:0004497	F:monooxygenase activity	0.0071	0.77	0	0	0.0023
303	Cgl0830	fkpA	MULTISPECIES: FKBP-type peptidyl-prolyl cis-trans isomerase	0	0	2.03	2.12	0	P:GO:0000413; F:GO:0003755	P:protein peptidyl-prolyl isomerization; F:peptidyl-prolyl cis-trans isomerase activity	0.0085	3.1e-14	0	0	2.8e-18
304	Cgl0706		acyl-CoA carboxylase subunit epsilon	0	0	2.07	2.1	0	0	0	0.44	0.92	0	0	0.13
305	Cgl0073		MULTISPECIES: hypothetical protein	0	0	4.18	2.09	0	0	0	0.05	0.4	0	0	1
306	Cgl0492		DUF1707 and DUF2154 domain-containing protein	0	0	3.9	2.09	0	0	0	5e-10	0.9	0	0	0.78
307	Cgl2628		ABC transporter substrate-binding protein	0	0	3.64	2.08	0	P:GO:0007155; P:GO:0030001; F:GO:0046872	P:cell adhesion; P:metal ion transport; F:metal ion binding	5.2e-05	0	0	0	0.32
308	Cgl2607	cgtR3	DNA-binding response regulator	0	0	2.33	2.08	0	P:GO:0000160; P:GO:0006355; F:GO:0003677	P:phosphorelay signal transduction system; P:regulation of transcription, DNA-templated; F:DNA binding	0.37	0.26	0	0	5.6e-05
309	Cgl0692		cobalamin biosynthesis protein CobW	0	0	2.75	2.07	0	0	0	1	0.41	0	0	0.6
310	Cgl0651		DUF3500 domain-containing protein	0	0	2.32	2.07	0	0	0	0.71	1.2e-17	0	0	0.093
311	Cgl0343	cmt1	esterase	0	0	2.89	2.05	0	F:GO:0016740	F:transferase activity	3e-14	2e-06	0	0	0.0091
312	Cgl2381		TetR family transcriptional regulator	0	0	2.73	2.04	0	F:GO:0003677	F:DNA binding	0.11	0.065	0	0	0.0046
313	Cgl2526	ftn	ferritin-like protein	0	0	2.58	2.02	0	P:GO:0006826; P:GO:0006879; F:GO:0004322; F:GO:0008199; C:GO:0005737	P:iron ion transport; P:cellular iron ion homeostasis; F:ferroxidase activity; F:ferric iron binding; C:cytoplasm	0.011	7.1e-08	0	0	0.23
314	Cgl1140		putative membrane protein	0	0	2.25	2.02	0	F:GO:0047134; C:GO:0016021	F:protein-disulfide reductase activity; C:integral component of membrane	0.61	2.7e-15	0	0	0.038
315	Cgl1448		HlyC/CorC family transporter	0	2.88	0	2.02	0	C:GO:0016021	C:integral component of membrane	0.23	0	0.051	0	0.0025
316	Cgl0071		putative membrane protein	0	0	2.25	2.01	0	C:GO:0016021	C:integral component of membrane	0.28	0.24	0	0	3.7e-10
317	Cgl1317		hypothetical protein AUP70_10715	0	2.37	2.07	0	0	0	0	0.16	0	0	0.0036	1
318	Cgl2368		pirin family protein	0	0	0	0	5.04	0	0	0.13	0.66	2.4e-15	0	3.8e-08
319	Cgl0519		Hypothetical membrane protein	0	0	0	0	4.55	C:GO:0016021	C:integral component of membrane	0.3	0.79	0.77	0.057	2e-10
320	Cgl0798		hypothetical protein SB89_04165	0	0	0	0	4.43	0	0	0.43	1	0	0	4e-06
321	Cgl1394	argC	N-acetyl-gamma-glutamyl-phosphate reductase	0	0	0	0	4.12	P:GO:0006526; F:GO:0003942; F:GO:0046983; F:GO:0051287; C:GO:0005737	P:arginine biosynthetic process; F:N-acetyl-gamma-glutamyl-phosphate reductase activity; F:protein dimerization activity; F:NAD binding; C:cytoplasm	0.11	0.053	0.021	0	3.5e-12
322	Cgl1396	argB	acetylglutamate kinase	0	0	0	0	3.83	P:GO:0016310; P:GO:0042450; F:GO:0003991; F:GO:0005524; C:GO:0005737	P:phosphorylation; P:arginine biosynthetic process via ornithine; F:acetylglutamate kinase activity; F:ATP binding; C:cytoplasm	0.25	0.0014	0.0038	0	5.6e-13
323	Cgl2703		DUF350 domain-containing protein	0	0	0	0	3.71	C:GO:0005886; C:GO:0016021	C:plasma membrane; C:integral component of membrane	1	1	0.51	0.0039	3e-05
324	Cgl0664	icd	isocitrate dehydrogenase	0	0	0	0	3.55	P:GO:0006097; P:GO:0006099; F:GO:0004450; F:GO:0046872	P:glyoxylate cycle; P:tricarboxylic acid cycle; F:isocitrate dehydrogenase (NADP+) activity; F:metal ion binding	9.1e-15	3.4e-08	0	0	0
325	Cgl2155	ftsZ	cell division protein FtsZ	0	0	0	0	3.48	P:GO:0000917; P:GO:0043093; P:GO:0051258; F:GO:0003924; F:GO:0005525; C:GO:0005737; C:GO:0032153	P:division septum assembly; P:FtsZ-dependent cytokinesis; P:protein polymerization; F:GTPase activity; F:GTP binding; C:cytoplasm; C:cell division site	0.0084	0.28	0.0045	0.00022	1.2e-14
326	Cgl2074	rnc	ribonuclease III	0	0	0	0	3.45	P:GO:0006364; P:GO:0006397; P:GO:0008033; P:GO:0016075; P:GO:0090502; F:GO:0004525; F:GO:0019843; F:GO:0046872; C:GO:0005737	P:rRNA processing; P:mRNA processing; P:tRNA processing; P:rRNA catabolic process; P:RNA phosphodiester bond hydrolysis, endonucleolytic; F:ribonuclease III activity; F:rRNA binding; F:metal ion binding; C:cytoplasm	0.031	0.49	9.8e-10	8e-16	2.4e-05
327	Cgl1395	argJ	bifunctional glutamate N-acetyltransferase/amino-acid acetyltransferase ArgJ	0	0	0	0	3.29	P:GO:0006526; F:GO:0004042; F:GO:0004358; F:GO:0103045; C:GO:0005737	P:arginine biosynthetic process; F:acetyl-CoA:L-glutamate N-acetyltransferase activity; F:glutamate N-acetyltransferase activity; F:methione N-acyltransferase activity; C:cytoplasm	0.39	0.026	3.9e-05	6.4e-06	1.2e-12
328	Cgl0237		3,4-dioxygenase subunit beta	0	0	0	0	3.23	P:GO:0006725; F:GO:0008199; F:GO:0016702	P:cellular aromatic compound metabolic process; F:ferric iron binding; F:oxidoreductase activity, acting on single donors with incorporation of molecular oxygen, incorporation of two atoms of oxygen	1	0.47	6.6e-07	2.2e-06	0.00025
329	Cgl2206		MULTISPECIES: hypothetical protein	0	0	0	0	3.08	0	0	1	1	0.0048	0.069	0.00022
330	Cgl1134		(2Fe-2S)-binding protein	0	0	0	0	2.95	F:GO:0051537	F:2 iron, 2 sulfur cluster binding	0.22	0.82	1	3.1e-05	6.8e-06
331	Cgl1245		amino acid-binding ACT domain protein	0	0	0	0	2.95	0	0	0.28	1	0.0019	7e-07	8.7e-05
332	Cgl0673		Hypothetical membrane protein	0	0	0	0	2.84	C:GO:0016021	C:integral component of membrane	0.11	0.11	9.8e-08	0.00074	0
333	Cgl0123		MULTISPECIES: hypothetical protein	0	0	0	0	2.82	0	0	0.46	0.2	7.1e-09	0	9.6e-05
334	Cgl1578	devB	6-phosphogluconolactonase	0	0	0	0	2.77	P:GO:0005975; P:GO:0006098; F:GO:0017057	P:carbohydrate metabolic process; P:pentose-phosphate shunt; F:6-phosphogluconolactonase activity	0.46	0.68	0.44	0.14	9.7e-05
335	Cgl0243		MULTISPECIES: YbaB/EbfC family nucleoid-associated protein	0	0	0	0	2.74	F:GO:0003677; C:GO:0005737; C:GO:0043590	F:DNA binding; C:cytoplasm; C:bacterial nucleoid	0.6	0.032	3.7e-11	2e-16	1e-17
336	Cgl2238		Nif3-like dinuclear metal center hexameric protein	0	0	0	0	2.72	F:GO:0016787; F:GO:0046872	F:hydrolase activity; F:metal ion binding	0.61	0.036	0.091	0	4.7e-07
337	Cgl3012	dadA	amino acid dehydrogenase	0	0	0	0	2.72	F:GO:0016491	F:oxidoreductase activity	0.34	0.83	0.59	0.012	2.9e-09
338	Cgl2370	ndk	multifunctional nucleoside diphosphate kinase/apyrimidinic endonuclease/3'-phosphodiesterase	0	0	0	0	2.69	P:GO:0006165; P:GO:0006183; P:GO:0006228; P:GO:0006241; P:GO:0090305; F:GO:0004519; F:GO:0004550; F:GO:0005524; F:GO:0046872; C:GO:0005737	P:nucleoside diphosphate phosphorylation; P:GTP biosynthetic process; P:UTP biosynthetic process; P:CTP biosynthetic process; P:nucleic acid phosphodiester bond hydrolysis; F:endonuclease activity; F:nucleoside diphosphate kinase activity; F:ATP binding; F:metal ion binding; C:cytoplasm	6.2e-05	0.63	2e-16	0.0035	3.8e-06
339	Cgl1438		YchJ family protein	0	0	0	0	2.68	0	0	0.97	1	4e-05	0.0012	3.9e-06
340	Cgl2039	thiO	glycine oxidase ThiO	0	0	0	0	2.46	P:GO:0009229; F:GO:0016491; F:GO:0050660	P:thiamine diphosphate biosynthetic process; F:oxidoreductase activity; F:flavin adenine dinucleotide binding	1	0.15	0	2e-14	1.5e-05
341	Cgl2232		SPOR domain-containing protein	0	0	0	0	2.46	0	0	0.11	1.3e-17	3.3e-11	8.4e-12	2.8e-12
342	Cgl1133	lipT	carboxylesterase/lipase family protein	0	0	0	0	2.43	F:GO:0016787	F:hydrolase activity	1	0.28	1	4.6e-06	0.00016
343	Cgl2305	idi	isopentenyl-diphosphate Delta-isomerase	0	0	0	0	2.38	P:GO:0008299; P:GO:0050992; F:GO:0004452; F:GO:0016787; F:GO:0046872; C:GO:0005737	P:isoprenoid biosynthetic process; P:dimethylallyl diphosphate biosynthetic process; F:isopentenyl-diphosphate delta-isomerase activity; F:hydrolase activity; F:metal ion binding; C:cytoplasm	0.29	0.68	0.02	0.007	2.8e-05
344	Cgl2310	brnQ	branched-chain amino acid transport system II carrier protein	0	0	0	0	2.34	P:GO:0015803; F:GO:0015658; C:GO:0005886; C:GO:0016021	P:branched-chain amino acid transport; F:branched-chain amino acid transmembrane transporter activity; C:plasma membrane; C:integral component of membrane	0.014	0.037	2.6e-11	0	1e-06
345	Cgl2664		putative secreted protein	0	0	0	0	2.32	0	0	0.12	0.56	0	1.8e-09	0.00013
346	Cgl1968	ftsK	DNA translocase FtsK	0	0	0	0	2.29	P:GO:0007049; P:GO:0007059; P:GO:0051301; F:GO:0003677; F:GO:0005524; C:GO:0005886; C:GO:0016021	P:cell cycle; P:chromosome segregation; P:cell division; F:DNA binding; F:ATP binding; C:plasma membrane; C:integral component of membrane	0.37	0.049	0.049	0	0.00032
347	Cgl2165		putative secreted protein	0	0	0	0	2.23	P:GO:0051301; C:GO:0016021	P:cell division; C:integral component of membrane	0.65	0.82	4.9e-08	0	3.6e-05
348	Cgl0298		phage holin family protein	0	0	0	0	2.17	C:GO:0016021	C:integral component of membrane	0.99	0.87	1.2e-12	0	0.00072
349	Cgl2217		MUTT/NUDIX family protein	0	0	0	0	2.15	F:GO:0016787	F:hydrolase activity	0.061	0.5	0.00085	6e-16	1.5e-12
350	Cgl1401	argH	argininosuccinate lyase	0	0	0	0	2.14	P:GO:0042450; F:GO:0004056; C:GO:0005737	P:arginine biosynthetic process via ornithine; F:argininosuccinate lyase activity; C:cytoplasm	0.0027	0.62	0.0041	3.8e-15	0.00093
351	Cgl1219		co-chaperone YbbN	0	0	0	0	2.13	0	0	0.2	0.99	0.32	0.0014	7.4e-07
352	Cgl1250	pfkA	6-phosphofructokinase	0	0	0	0	2.09	P:GO:0006002; P:GO:0046835; P:GO:0061615; F:GO:0003872; F:GO:0005524; F:GO:0046872; F:GO:0047334; C:GO:0005737	P:fructose 6-phosphate metabolic process; P:carbohydrate phosphorylation; P:glycolytic process through fructose-6-phosphate; F:6-phosphofructokinase activity; F:ATP binding; F:metal ion binding; F:diphosphate-fructose-6-phosphate 1-phosphotransferase activity; C:cytoplasm	5.7e-05	9.9e-08	5.3e-12	0	2.2e-07
353	Cgl2157	murC	UDP-N-acetylmuramate--L-alanine ligase	0	0	0	0	2.03	P:GO:0007049; P:GO:0008360; P:GO:0009252; P:GO:0051301; P:GO:0071555; F:GO:0005524; F:GO:0008763; C:GO:0005737	P:cell cycle; P:regulation of cell shape; P:peptidoglycan biosynthetic process; P:cell division; P:cell wall organization; F:ATP binding; F:UDP-N-acetylmuramate-L-alanine ligase activity; C:cytoplasm	0.17	0.55	1.8e-07	0	0.00051
354	Cgl0916		antibiotic biosynthesis monooxygenase	0	0	0	4.85	0	0	0	0.39	5e-07	0	0	0
355	Cgl1588	gap	glyceraldehyde-3-phosphate dehydrogenase	0	0	0	4.58	0	P:GO:0006006; P:GO:0006096; F:GO:0004365; F:GO:0050661; F:GO:0051287; C:GO:0005737	P:glucose metabolic process; P:glycolytic process; F:glyceraldehyde-3-phosphate dehydrogenase (NAD+) (phosphorylating) activity; F:NADP binding; F:NAD binding; C:cytoplasm	0.16	0	0	0	0
356	Cgl2674	butA	diacetyl reductase	0	0	0	4.48	0	P:GO:0034077; P:GO:0045150; P:GO:0051289; F:GO:0047512; F:GO:0052588; F:GO:0070403; F:GO:0070404	P:butanediol metabolic process; P:acetoin catabolic process; P:protein homotetramerization; F:(S,S)-butanediol dehydrogenase activity; F:diacetyl reductase ((S)-acetoin forming) activity; F:NAD+ binding; F:NADH binding	0.0088	0	0	0	0
357	Cgl1899		chlorite dismutase family protein	0	0	0	4.35	0	F:GO:0016491; F:GO:0020037; F:GO:0046872	F:oxidoreductase activity; F:heme binding; F:metal ion binding	0	5.2e-06	0	0	0
358	Cgl0974	eno	enolase	0	0	0	3.91	0	P:GO:0006096; F:GO:0000287; F:GO:0004634; C:GO:0000015; C:GO:0005576; C:GO:0009986	P:glycolytic process; F:magnesium ion binding; F:phosphopyruvate hydratase activity; C:phosphopyruvate hydratase complex; C:extracellular region; C:cell surface	2.1e-05	0	0.99	0	7.1e-10
359	Cgl2770	fda	fructose-bisphosphate aldolase	0	0	0	3.81	0	P:GO:0006096; F:GO:0004332; F:GO:0008270	P:glycolytic process; F:fructose-bisphosphate aldolase activity; F:zinc ion binding	0.00024	9.1e-09	0	0	9.2e-12
360	Cgl1587	pgk	phosphoglycerate kinase	0	0	0	3.63	0	P:GO:0006096; F:GO:0004618; F:GO:0005524; C:GO:0005737	P:glycolytic process; F:phosphoglycerate kinase activity; F:ATP binding; C:cytoplasm	0.11	1.5e-24	8e-16	0	3.7e-08
361	Cgl1586	tpi	triosephosphate isomerase	0	0	0	3.51	0	P:GO:0006094; P:GO:0006096; F:GO:0004807; C:GO:0005737	P:gluconeogenesis; P:glycolytic process; F:triose-phosphate isomerase activity; C:cytoplasm	0.55	5.9e-08	5.2e-15	0	9.1e-13
362	Cgl2863	pck	phosphoenolpyruvate carboxykinase	0	0	0	3.42	0	P:GO:0006094; P:GO:0016310; F:GO:0004613; F:GO:0005525; F:GO:0016301; F:GO:0030145; C:GO:0005737	P:gluconeogenesis; P:phosphorylation; F:phosphoenolpyruvate carboxykinase (GTP) activity; F:GTP binding; F:kinase activity; F:manganese ion binding; C:cytoplasm	0.00011	0.00028	0	0	8.1e-07
363	Cgl2380	mdh	malate dehydrogenase	0	0	0	3.39	0	P:GO:0005975; P:GO:0006099; P:GO:0006108; F:GO:0030060	P:carbohydrate metabolic process; P:tricarboxylic acid cycle; P:malate metabolic process; F:L-malate dehydrogenase activity	1	0.68	1.2e-10	0	0.0035
364	Cgl2709		FAD-dependent oxidoreductase	0	0	0	3.33	0	F:GO:0016491; F:GO:0050660	F:oxidoreductase activity; F:flavin adenine dinucleotide binding	0.0028	0.069	0	0	1.8e-05
365	Cgl0841		MULTISPECIES: hypothetical protein	0	0	0	3.29	0	0	0	3.3e-09	0.96	0	0	0.8
366	Cgl1118	glgC	glucose-1-phosphate adenylyltransferase	0	0	0	3.24	0	P:GO:0005978; F:GO:0005524; F:GO:0008878	P:glycogen biosynthetic process; F:ATP binding; F:glucose-1-phosphate adenylyltransferase activity	2.5e-05	0.14	0	0	7.5e-06
367	Cgl0378		DUF2516 family protein	0	0	0	3.1	0	C:GO:0016021	C:integral component of membrane	0.98	0.98	0	0	2.8e-08
368	Cgl0033		hypothetical protein cgR_0047	0	0	0	3.08	0	C:GO:0016021	C:integral component of membrane	4.2e-07	0.21	4.8e-15	0	0.00016
369	Cgl0983		Bax inhibitor-1/YccA family protein	0	0	0	3.05	0	C:GO:0016021	C:integral component of membrane	0.18	0.93	0	0	5.9e-09
370	Cgl2673		DUF4236 domain-containing protein	0	0	0	3	0	0	0	0.73	0.82	1.7e-10	0	0.00044
371	Cgl2949		PspA/IM30 family protein	0	0	0	2.98	0	0	0	1.5e-06	0.87	0	0	1.9e-07
372	Cgl0858		M23 family metallopeptidase	0	0	0	2.97	0	C:GO:0016021	C:integral component of membrane	0.083	0.32	0	0	2.5e-07
373	Cgl1444		Predicted transcriptional regulator	0	0	0	2.9	0	P:GO:0006355; F:GO:0003677	P:regulation of transcription, DNA-templated; F:DNA binding	6.6e-08	0.019	0	0	9.2e-09
374	Cgl1574	tkt	transketolase	0	0	0	2.9	0	F:GO:0004802; F:GO:0046872	F:transketolase activity; F:metal ion binding	0.077	0.21	2.6e-11	0	0.0048
375	Cgl0400		long-chain fatty acid--CoA ligase	0	0	0	2.87	0	P:GO:0001676; F:GO:0004467; F:GO:0102391	P:long-chain fatty acid metabolic process; F:long-chain fatty acid-CoA ligase activity; F:decanoate-CoA ligase activity	0.3	0.47	0	0	0.00035
376	Cgl0120		gamma carbonic anhydrase family protein	0	0	0	2.86	0	F:GO:0016740	F:transferase activity	0.41	2.8e-05	7.5e-11	0	0.0011
377	Cgl2236		bifunctional RNase H/acid phosphatase	0	0	0	2.86	0	P:GO:0090502; F:GO:0003676; F:GO:0004523	P:RNA phosphodiester bond hydrolysis, endonucleolytic; F:nucleic acid binding; F:RNA-DNA hybrid ribonuclease activity	8.5e-05	0.027	2.1e-14	0	2.3e-07
378	Cgl2678	clpC	NDP-hexose 4-ketoreductase	0	0	0	2.86	0	P:GO:0006508; F:GO:0005524; F:GO:0008233; F:GO:0016887	P:proteolysis; F:ATP binding; F:peptidase activity; F:ATPase activity	0.0098	0.017	0	0	0.014
379	Cgl1430		transcriptional regulator	0	0	0	2.82	0	0	0	0.0032	0.96	0	0	0
380	Cgl1919	sigB	RNA POLYMERASE SIGMA FACTOR	0	0	0	2.79	0	P:GO:2000142; F:GO:0003677; F:GO:0016987	P:regulation of DNA-templated transcription, initiation; F:DNA binding; F:sigma factor activity	4.8e-15	4.3e-18	0	0	0.00011
381	Cgl1495		prokaryotic ubiquitin-like protein Pup	0	0	0	2.74	0	P:GO:0010498; P:GO:0019941; P:GO:0070490; F:GO:0031386; F:GO:0070628	P:proteasomal protein catabolic process; P:modification-dependent protein catabolic process; P:protein pupylation; F:protein tag; F:proteasome binding	0.38	0.24	0	0	4.2e-18
382	Cgl2379		TIGR00730 family Rossman fold protein	0	0	0	2.74	0	P:GO:0009691; F:GO:0003677; F:GO:0016787	P:cytokinin biosynthetic process; F:DNA binding; F:hydrolase activity	0.74	0.0079	6.5e-11	0	1
383	Cgl0666		iron-dicitrate transporter ATP-binding subunit	0	0	0	2.71	0	F:GO:0005524; F:GO:0016887	F:ATP binding; F:ATPase activity	0.07	0.9	1.1e-11	0	0.37
384	Cgl2619		HAD family hydrolase	0	0	0	2.7	0	F:GO:0016787	F:hydrolase activity	4.6e-09	0.0056	0	0	1e-06
385	Cgl1948		membrane protein	0	0	0	2.67	0	C:GO:0016021	C:integral component of membrane	0.73	0.89	0.025	0	0.034
386	Cgl2926	msrA	methionine sulfoxide reductase A	0	0	0	2.65	0	P:GO:0006464; F:GO:0008113	P:cellular protein modification process; F:peptide-methionine (S)-S-oxide reductase activity	0.64	0.0084	0	0	0.0014
387	Cgl3048		Hypothetical protein	0	0	0	2.65	0	0	0	3.8e-08	0.48	0	0	7e-12
388	Cgl1609	carB	carbamoyl phosphate synthase large subunit	0	0	0	2.63	0	P:GO:0006526; P:GO:0044205; F:GO:0004088; F:GO:0005524; F:GO:0046872	P:arginine biosynthetic process; P:'de novo' UMP biosynthetic process; F:carbamoyl-phosphate synthase (glutamine-hydrolyzing) activity; F:ATP binding; F:metal ion binding	0.089	0.035	0.0058	0	1.3e-11
389	Cgl0668		iron ABC transporter permease	0	0	0	2.61	0	P:GO:0055085; F:GO:0022857; C:GO:0005886; C:GO:0016021	P:transmembrane transport; F:transmembrane transporter activity; C:plasma membrane; C:integral component of membrane	0.3	3.4e-05	4.2e-12	0	3.8e-12
390	Cgl1585	ppc	phosphoenolpyruvate carboxylase	0	0	0	2.59	0	P:GO:0006099; P:GO:0006107; P:GO:0015977; F:GO:0000287; F:GO:0008964	P:tricarboxylic acid cycle; P:oxaloacetate metabolic process; P:carbon fixation; F:magnesium ion binding; F:phosphoenolpyruvate carboxylase activity	0.61	2e-11	0	0	0.22
391	Cgl1116		beta-fructosidase	0	0	0	2.58	0	P:GO:0005975; F:GO:0004564; F:GO:0031219	P:carbohydrate metabolic process; F:beta-fructofuranosidase activity; F:levanase activity	0.0084	0.8	4.3e-13	0	0.17
392	Cgl2799	grpE	nucleotide exchange factor GrpE	0	0	0	2.52	0	P:GO:0006457; P:GO:0050790; F:GO:0000774; F:GO:0042803; F:GO:0051087; C:GO:0005737	P:protein folding; P:regulation of catalytic activity; F:adenyl-nucleotide exchange factor activity; F:protein homodimerization activity; F:chaperone binding; C:cytoplasm	0.53	1.6e-05	8e-16	0	9.1e-10
393	Cgl2290	dnaJ2	molecular chaperone DnaJ	0	0	0	2.51	0	P:GO:0006260; P:GO:0006457; P:GO:0009408; F:GO:0005524; F:GO:0008270; F:GO:0031072; F:GO:0051082; C:GO:0005737	P:DNA replication; P:protein folding; P:response to heat; F:ATP binding; F:zinc ion binding; F:heat shock protein binding; F:unfolded protein binding; C:cytoplasm	0.0073	0.00047	0	0	0.75
394	Cgl1056		VWA domain-containing protein	0	0	0	2.49	0	0	0	0.75	0.95	9.6e-13	0	0.013
395	Cgl0679		RDD family protein	0	0	0	2.48	0	C:GO:0016021	C:integral component of membrane	3.7e-07	2.3e-10	0	0	2.9e-06
396	Cgl3052		preprotein translocase subunit TatA	0	0	0	2.48	0	P:GO:0043953; F:GO:0008320; C:GO:0005887; C:GO:0033281	P:protein transport by the Tat complex; F:protein transmembrane transporter activity; C:integral component of plasma membrane; C:TAT protein transport complex	0.025	0.21	0	0	2.7e-08
397	Cgl1613	pyrR	bifunctional pyrimidine regulatory protein PyrR uracil phosphoribosyltransferase	0	0	0	2.47	0	P:GO:0006355; P:GO:0009116; F:GO:0004845	P:regulation of transcription, DNA-templated; P:nucleoside metabolic process; F:uracil phosphoribosyltransferase activity	0.76	0.15	3.5e-11	0	0.0021
398	Cgl0410	proC	pyrroline-5-carboxylate reductase	0	0	0	2.46	0	P:GO:0055129; F:GO:0004735; C:GO:0005737	P:L-proline biosynthetic process; F:pyrroline-5-carboxylate reductase activity; C:cytoplasm	0.0029	0.93	0	0	0.0007
399	Cgl0949	cgtR10	LuxR family transcriptional regulator	0	0	0	2.46	0	P:GO:0000160; P:GO:0006355; F:GO:0003677	P:phosphorelay signal transduction system; P:regulation of transcription, DNA-templated; F:DNA binding	0.35	6.9e-11	0	0	0.00022
400	Cgl0475	nusG	transcription termination/antitermination protein NusG	0	0	0	2.44	0	P:GO:0031564; P:GO:0032784	P:transcription antitermination; P:regulation of DNA-templated transcription, elongation	0.011	0.56	8e-16	0	8.6e-07
401	Cgl1926		DUF2189 domain-containing protein	0	0	0	2.44	0	C:GO:0016021	C:integral component of membrane	0.31	0.65	0.00042	0	0.00064
402	Cgl0445		ArsR family transcriptional regulator	0	0	0	2.42	0	P:GO:0006355; F:GO:0003700	P:regulation of transcription, DNA-templated; F:DNA-binding transcription factor activity	0.82	0.017	5.6e-08	0	0.00065
403	Cgl2444		short-chain dehydrogenase	0	0	0	2.42	0	F:GO:0016491	F:oxidoreductase activity	0.016	0.14	0	0	0.96
404	Cgl0607	guaA	GMP synthase	0	0	0	2.41	0	P:GO:0006177; P:GO:0006541; F:GO:0003922; F:GO:0005524; F:GO:0016462	P:GMP biosynthetic process; P:glutamine metabolic process; F:GMP synthase (glutamine-hydrolyzing) activity; F:ATP binding; F:pyrophosphatase activity	0.23	0.008	0	0	0.1
405	Cgl2800	dnaK	molecular chaperone DnaK	0	0	0	2.41	0	P:GO:0006457; F:GO:0005524; F:GO:0051082	P:protein folding; F:ATP binding; F:unfolded protein binding	0.64	0.63	1.1e-11	0	1e-08
406	Cgl0861	purH	bifunctional phosphoribosylaminoimidazolecarboxamide formyltransferase/IMP cyclohydrolase	0	0	0	2.4	0	P:GO:0006189; F:GO:0003937; F:GO:0004643	P:'de novo' IMP biosynthetic process; F:IMP cyclohydrolase activity; F:phosphoribosylaminoimidazolecarboxamide formyltransferase activity	0.33	0.14	0.00024	0	0.0032
407	Cgl2241		SURF1 family protein	0	0	0	2.4	0	C:GO:0005886; C:GO:0016021	C:plasma membrane; C:integral component of membrane	5.4e-05	0.5	0	0	0.028
408	Cgl0439		TlpA family protein disulfide reductase	0	0	0	2.37	0	P:GO:0098869; F:GO:0016209; F:GO:0016491; F:GO:0016853	P:cellular oxidant detoxification; F:antioxidant activity; F:oxidoreductase activity; F:isomerase activity	1.4e-07	0.58	0	0	5.4e-05
409	Cgl0877		molybdenum cofactor biosynthesis protein	0	0	0	2.36	0	0	0	2.2e-08	0.25	0	0	1.4e-06
410	Cgl2536		pyridoxamine 5-phosphate oxidase	0	0	0	2.36	0	0	0	0.18	2.6e-06	0	0	1
411	Cgl2359	dkgA	2,5-diketo-D-gluconic acid reductase	0	0	0	2.34	0	F:GO:0050580	F:2,5-didehydrogluconate reductase activity	2.7e-09	6.7e-09	1.9e-11	0	1.1e-10
412	Cgl0209	moaE	molybdopterin converting factor	0	0	0	2.33	0	P:GO:0006777	P:Mo-molybdopterin cofactor biosynthetic process	0.79	0.0079	0.00019	0	0.98
413	Cgl3090	trxB	pyridine nucleotide-disulfide oxidoreductase	0	0	0	2.33	0	P:GO:0019430; F:GO:0004791; C:GO:0005737	P:removal of superoxide radicals; F:thioredoxin-disulfide reductase activity; C:cytoplasm	0.00062	0.43	0	0	0.12
414	Cgl0696	prpC1	Citrate synthase	0	0	0	2.31	0	P:GO:0006099; F:GO:0036440; F:GO:0050440; C:GO:0005737	P:tricarboxylic acid cycle; F:citrate synthase activity; F:2-methylcitrate synthase activity; C:cytoplasm	1	7e-05	0.071	0	0.0025
415	Cgl0155	pepO	peptidase M13	0	0	0	2.3	0	P:GO:0006508; F:GO:0004222; F:GO:0046872	P:proteolysis; F:metalloendopeptidase activity; F:metal ion binding	0.46	1	2e-16	0	0.045
416	Cgl0210	moaB	MogA/MoaB family molybdenum cofactor biosynthesis protein	0	0	0	2.3	0	0	0	0.54	5.2e-11	5.1e-10	0	0.049
417	Cgl2109	gip	hydroxypyruvate isomerase	0	0	0	2.29	0	F:GO:0008903	F:hydroxypyruvate isomerase activity	0.81	0.0031	0.18	0	1.4e-09
418	Cgl2990		membrane protein	0	0	0	2.29	0	C:GO:0016021	C:integral component of membrane	0.29	0.52	0	0	1
419	Cgl2118	treY	malto-oligosyltrehalose synthase	0	0	0	2.28	0	P:GO:0005975; F:GO:0047470	P:carbohydrate metabolic process; F:(1,4)-alpha-D-glucan 1-alpha-D-glucosylmutase activity	0.48	0.63	4.1e-07	0	0.039
420	Cgl3095	parA1	ParA family protein	0	0	0	2.28	0	P:GO:0009103; P:GO:0016310; P:GO:0018108; P:GO:0045226; F:GO:0000166; F:GO:0004713; F:GO:0005524; F:GO:0016301; F:GO:0016740; C:GO:0005886; C:GO:0016020; C:GO:0016021	P:lipopolysaccharide biosynthetic process; P:phosphorylation; P:peptidyl-tyrosine phosphorylation; P:extracellular polysaccharide biosynthetic process; F:nucleotide binding; F:protein tyrosine kinase activity; F:ATP binding; F:kinase activity; F:transferase activity; C:plasma membrane; C:membrane; C:integral component of membrane	0.74	2.2e-07	0	0	0.13
421	Cgl2925		amidohydrolase	0	0	0	2.27	0	F:GO:0050118	F:N-acetyldiaminopimelate deacetylase activity	0.94	0.82	0	0	1.6e-06
422	Cgl0408	ppx1	EXOPOLYPHOSPHATASE	0	0	0	2.26	0	0	0	0.63	0.96	0	0	0.00064
423	Cgl1478	ppmC	glycosyl transferase	0	0	0	2.25	0	P:GO:0097502; F:GO:0004582	P:mannosylation; F:dolichyl-phosphate beta-D-mannosyltransferase activity	0.85	0.4	4.7e-14	0	0.0075
424	Cgl2754	fprA	pyridine nucleotide-disulfide oxidoreductase	0	0	0	2.24	0	F:GO:0004324	F:ferredoxin-NADP+ reductase activity	0.002	0.018	3.3e-11	0	0.45
425	Cgl0377		MULTISPECIES: hypothetical protein	0	0	0	2.23	0	0	0	0.0017	0.46	6.1e-09	0	0.0047
426	Cgl1060		phosphonomutase	0	0	0	2.22	0	F:GO:0008807	F:carboxyvinyl-carboxyphosphonate phosphorylmutase activity	0.54	1	6.7e-05	0	3.7e-10
427	Cgl2356	proB	glutamate 5-kinase	0	0	0	2.21	0	P:GO:0016310; P:GO:0055129; F:GO:0003723; F:GO:0004349; F:GO:0005524; C:GO:0005737	P:phosphorylation; P:L-proline biosynthetic process; F:RNA binding; F:glutamate 5-kinase activity; F:ATP binding; C:cytoplasm	0.25	0.061	0.004	0	1.7e-05
428	Cgl1961		PspA/IM30 family protein	0	0	0	2.2	0	0	0	0.054	0.79	0	0	0.026
429	Cgl2943	uspA3	universal stress protein	0	0	-2.14	2.2	0	0	0	0.45	0.043	0	0	2.9e-06
430	Cgl0835		Tat pathway signal sequence domain protein	0	0	0	2.19	0	0	0	0.25	0.056	4.8e-15	0	0.022
431	Cgl1442		MerR family transcriptional regulator	0	0	0	2.19	0	P:GO:0006355; F:GO:0003677	P:regulation of transcription, DNA-templated; F:DNA binding	0.34	0.93	0	0	0.14
432	Cgl2962		copper-translocating P-type ATPase	0	0	0	2.18	0	P:GO:0098655; F:GO:0005524; F:GO:0016787; F:GO:0019829; F:GO:0046872; C:GO:0005886; C:GO:0016021	P:cation transmembrane transport; F:ATP binding; F:hydrolase activity; F:ATPase-coupled cation transmembrane transporter activity; F:metal ion binding; C:plasma membrane; C:integral component of membrane	0.25	5.3e-08	0.67	0	1
433	Cgl1110		DNA-binding protein	0	0	0	2.17	0	P:GO:0009691; F:GO:0003677; F:GO:0016787	P:cytokinin biosynthetic process; F:DNA binding; F:hydrolase activity	0.001	0.041	2.7e-08	0	4.3e-05
434	Cgl2499		MULTISPECIES: DUF3817 domain-containing protein	0	0	0	2.16	0	C:GO:0005886; C:GO:0016021	C:plasma membrane; C:integral component of membrane	5.2e-06	0.58	0	0	2e-07
435	Cgl0843	folA	dihydrofolate reductase	0	0	0	2.15	0	P:GO:0006545; P:GO:0006730; P:GO:0016310; P:GO:0046654; F:GO:0004146; F:GO:0016301; F:GO:0050661	P:glycine biosynthetic process; P:one-carbon metabolic process; P:phosphorylation; P:tetrahydrofolate biosynthetic process; F:dihydrofolate reductase activity; F:kinase activity; F:NADP binding	0.00058	0.5	0	0	0.08
436	Cgl1494		Pup--protein ligase	0	0	0	2.14	0	P:GO:0010498; P:GO:0019941; P:GO:0070490; F:GO:0000287; F:GO:0005524; F:GO:0016879; F:GO:0019787; C:GO:0000502	P:proteasomal protein catabolic process; P:modification-dependent protein catabolic process; P:protein pupylation; F:magnesium ion binding; F:ATP binding; F:ligase activity, forming carbon-nitrogen bonds; F:ubiquitin-like protein transferase activity; C:proteasome complex	0.56	0.011	0	0	1.2e-11
437	Cgl0119		HAD family hydrolase	0	0	0	2.12	0	F:GO:0016787	F:hydrolase activity	0.11	0.059	0.09	0	0.019
438	Cgl1149	cydB	cytochrome d ubiquinol oxidase subunit II	0	0	0	2.11	0	F:GO:0016491; C:GO:0005886; C:GO:0016021	F:oxidoreductase activity; C:plasma membrane; C:integral component of membrane	7.1e-10	0.94	0	0	0.42
439	Cgl1121		MULTISPECIES: hypothetical protein	0	0	0	2.1	0	0	0	0.76	0.75	1.3e-07	0	0.0004
440	Cgl1231	fixB	electron transfer flavoprotein subunit alpha	0	0	0	2.1	0	P:GO:0022900; F:GO:0009055; F:GO:0050660	P:electron transport chain; F:electron transfer activity; F:flavin adenine dinucleotide binding	7.2e-09	0.017	9.7e-13	0	0.082
441	Cgl1397	argD	acetylornithine aminotransferase	0	0	0	2.09	0	P:GO:0006526; F:GO:0003992; F:GO:0030170; C:GO:0005737	P:arginine biosynthetic process; F:N2-acetyl-L-ornithine:2-oxoglutarate 5-aminotransferase activity; F:pyridoxal phosphate binding; C:cytoplasm	0.16	1.7e-05	0.00013	0	8.9e-10
442	Cgl2256	nagD	HAD family hydrolase	0	0	0	2.08	0	P:GO:0016052; P:GO:0016311; F:GO:0016791; F:GO:0046872	P:carbohydrate catabolic process; P:dephosphorylation; F:phosphatase activity; F:metal ion binding	0.31	1	3.8e-09	0	0.88
443	Cgl0764	aroA	3-phosphoshikimate 1-carboxyvinyltransferase	0	0	0	2.07	0	P:GO:0006508; P:GO:0006974; P:GO:0008652; P:GO:0009073; P:GO:0009423; P:GO:0018142; F:GO:0003697; F:GO:0003866; F:GO:0008233; C:GO:0005737	P:proteolysis; P:cellular response to DNA damage stimulus; P:cellular amino acid biosynthetic process; P:aromatic amino acid family biosynthetic process; P:chorismate biosynthetic process; P:protein-DNA covalent cross-linking; F:single-stranded DNA binding; F:3-phosphoshikimate 1-carboxyvinyltransferase activity; F:peptidase activity; C:cytoplasm	0.99	0.43	4e-07	0	0.041
444	Cgl0752	sahH	S-adenosyl-L-homocysteine hydrolase	0	0	0	2.06	0	P:GO:0006730; F:GO:0004013; C:GO:0005737	P:one-carbon metabolic process; F:adenosylhomocysteinase activity; C:cytoplasm	0.31	0.00051	9e-10	0	0.22
445	Cgl0758		Hypothetical protein	0	0	0	2.06	0	0	0	0.15	0	0	0	0.26
446	Cgl1452	gnd	6-PHOSPHOGLUCONATE DEHYDROGENASE	0	0	0	2.06	0	P:GO:0006098; P:GO:0019521; F:GO:0004616; F:GO:0050661	P:pentose-phosphate shunt; P:D-gluconate metabolic process; F:phosphogluconate dehydrogenase (decarboxylating) activity; F:NADP binding	0.0066	0.0091	5e-07	0	0.0062
447	Cgl1933	ptsI	phosphoenolpyruvate--protein phosphotransferase	0	0	0	2.06	0	P:GO:0009401; P:GO:0016310; F:GO:0008965; F:GO:0016301; F:GO:0046872; C:GO:0005737	P:phosphoenolpyruvate-dependent sugar phosphotransferase system; P:phosphorylation; F:phosphoenolpyruvate-protein phosphotransferase activity; F:kinase activity; F:metal ion binding; C:cytoplasm	0.72	0.052	0.00046	0	0.025
448	Cgl2038	thiE	thiamine-phosphate pyrophosphorylase	0	0	0	2.05	0	P:GO:0009228; P:GO:0009229; F:GO:0000287; F:GO:0004789	P:thiamine biosynthetic process; P:thiamine diphosphate biosynthetic process; F:magnesium ion binding; F:thiamine-phosphate diphosphorylase activity	1	1	0	0	1.2e-08
449	Cgl3038		ABC transporter ATPase	0	0	0	2.05	0	F:GO:0005524	F:ATP binding	0.00077	0.17	0.78	0	0.13
450	Cgl0403	cgtS4	two-component sensor histidine kinase	0	0	0	2.04	0	P:GO:0000160; P:GO:0016310; F:GO:0000155; C:GO:0005886	P:phosphorelay signal transduction system; P:phosphorylation; F:phosphorelay sensor kinase activity; C:plasma membrane	3e-10	0.17	7.2e-06	0	0.31
451	Cgl0753	tmk	thymidylate kinase	0	0	0	2.04	0	P:GO:0006233; P:GO:0006235; P:GO:0016310; P:GO:0046940; F:GO:0004798; F:GO:0005524	P:dTDP biosynthetic process; P:dTTP biosynthetic process; P:phosphorylation; P:nucleoside monophosphate phosphorylation; F:thymidylate kinase activity; F:ATP binding	0.00067	0.72	1.5e-10	0	0.64
452	Cgl0918		HAD family hydrolase	0	0	0	2.04	0	F:GO:0016787	F:hydrolase activity	0.02	1	0.0031	0	0.043
453	Cgl1150	cydA	cytochrome ubiquinol oxidase subunit I	0	0	0	2.03	0	P:GO:0019646; F:GO:0009055; F:GO:0046872; C:GO:0005886; C:GO:0016021; C:GO:0070069	P:aerobic electron transport chain; F:electron transfer activity; F:metal ion binding; C:plasma membrane; C:integral component of membrane; C:cytochrome complex	2.4e-05	2.1e-18	0	0	0.31
454	Cgl1184	thrB	homoserine kinase	0	0	0	2.02	0	P:GO:0009088; P:GO:0016310; F:GO:0004413; F:GO:0005524; C:GO:0005737	P:threonine biosynthetic process; P:phosphorylation; F:homoserine kinase activity; F:ATP binding; C:cytoplasm	0.024	7.8e-12	3e-14	0	0.00018
455	Cgl0013	gyrA	DNA gyrase subunit A	0	0	0	2.01	0	P:GO:0006261; P:GO:0006265; F:GO:0003677; F:GO:0003918; F:GO:0005524; C:GO:0005694; C:GO:0005737	P:DNA-dependent DNA replication; P:DNA topological change; F:DNA binding; F:DNA topoisomerase type II (double strand cut, ATP-hydrolyzing) activity; F:ATP binding; C:chromosome; C:cytoplasm	0.0013	0.53	2.4e-15	0	0.24
456	Cgl1390	pheT	phenylalanine--tRNA ligase subunit beta	0	0	0	2.01	0	P:GO:0006432; F:GO:0000049; F:GO:0000287; F:GO:0004826; F:GO:0005524; C:GO:0005737	P:phenylalanyl-tRNA aminoacylation; F:tRNA binding; F:magnesium ion binding; F:phenylalanine-tRNA ligase activity; F:ATP binding; C:cytoplasm	9.3e-05	1	0	0	0.7
457	Cgl1577	opcA	oxppcycle protein OpcA	0	0	0	2.01	0	0	0	0.23	0.4	1.3e-08	0	0.067
458	Cgl2119		GTP pyrophosphokinase	0	0	0	2.01	0	P:GO:0015969; P:GO:0016310; F:GO:0016301	P:guanosine tetraphosphate metabolic process; P:phosphorylation; F:kinase activity	0.017	1	4.2e-06	0	1
459	Cgl0990	aroF	3-deoxy-7-phosphoheptulonate synthase	0	-2.71	3.85	0	0	P:GO:0008652; P:GO:0009073; P:GO:0009423; F:GO:0003849	P:cellular amino acid biosynthetic process; P:aromatic amino acid family biosynthetic process; P:chorismate biosynthetic process; F:3-deoxy-7-phosphoheptulonate synthase activity	9.6e-06	0	0	0.16	0.5
460	Cgl1408		hypothetical protein cgR_5030	0	-2.48	3.15	0	0	0	0	5.8e-06	0	0	0.0026	1
461	Cgl2533		50S ribosomal protein L36	0	-2.34	3.39	0	0	P:GO:0006412; F:GO:0003735; C:GO:0005840	P:translation; F:structural constituent of ribosome; C:ribosome	1.2e-12	0	0	0	0.086
462	Cgl0476	rplK	50S ribosomal protein L11	0	0	4.22	0	0	P:GO:0006412; F:GO:0003735; F:GO:0070180; C:GO:0005840	P:translation; F:structural constituent of ribosome; F:large ribosomal subunit rRNA binding; C:ribosome	2.8e-06	0	0	0	0.56
463	Cgl0986	greA	transcription elongation factor GreA	0	0	3.98	0	0	P:GO:0006414; P:GO:0032784; F:GO:0003677; F:GO:0003746; F:GO:0070063	P:translational elongation; P:regulation of DNA-templated transcription, elongation; F:DNA binding; F:translation elongation factor activity; F:RNA polymerase binding	2.1e-09	0.88	0	0	1
464	Cgl0477	rplA	50S ribosomal protein L1	0	0	3.78	0	0	P:GO:0006417; F:GO:0000049; F:GO:0003735; F:GO:0019843; C:GO:0015934	P:regulation of translation; F:tRNA binding; F:structural constituent of ribosome; F:rRNA binding; C:large ribosomal subunit	5.2e-09	3.2e-13	0	0	0.097
465	Cgl0873	rpmF	50S ribosomal protein L32	0	0	3.77	0	0	P:GO:0006412; F:GO:0003735; C:GO:0015934	P:translation; F:structural constituent of ribosome; C:large ribosomal subunit	0.0047	3e-05	0	0	0.00021
466	Cgl0488	rpoB	DNA-directed RNA polymerase subunit beta	0	0	3.6	0	0	P:GO:0006351; F:GO:0003677; F:GO:0003899; F:GO:0032549	P:transcription, DNA-templated; F:DNA binding; F:DNA-directed 5'-3' RNA polymerase activity; F:ribonucleoside binding	2.2e-10	0.054	0	0	1.6e-16
467	Cgl0985		putative secreted protein	0	0	3.59	0	0	0	0	0.00053	1	0	2.3e-10	0.27
468	Cgl0939	rplY	50S ribosomal protein L25/general stress protein Ctc	0	0	3.27	0	0	P:GO:0006412; F:GO:0003735; F:GO:0008097; C:GO:0005840	P:translation; F:structural constituent of ribosome; F:5S rRNA binding; C:ribosome	0.0051	2.7e-07	0	6.5e-07	1
469	Cgl0308	cspA2	cold-shock protein	0	0	3.26	0	0	F:GO:0003676; C:GO:0005737	F:nucleic acid binding; C:cytoplasm	1.8e-06	0.055	0	0	1.3e-18
470	Cgl0797		Hypothetical protein	0	0	3.2	0	0	0	0	0.018	1	0	3.6e-13	0.0045
471	Cgl1161		DUF2269 domain-containing protein	0	0	3.18	0	0	C:GO:0016021	C:integral component of membrane	3e-12	0.72	0	9.1e-05	0.04
472	Cgl2021		DUF1049 domain-containing protein	0	0	3.06	0	0	C:GO:0005887	C:integral component of plasma membrane	0.0016	0.00024	0	6.4e-09	0.21
473	Cgl1335		Putative secreted protein	0	0	3.05	0	0	0	0	0.51	1	0	0.00023	1
474	Cgl0388		HtaA domain-containing protein	0	0	3.01	0	0	0	0	0.77	0.044	0	0	1
475	Cgl3098	rnpA	ribonuclease P protein component	0	0	2.99	0	0	P:GO:0001682; P:GO:0090502; F:GO:0000049; F:GO:0004526	P:tRNA 5'-leader removal; P:RNA phosphodiester bond hydrolysis, endonucleolytic; F:tRNA binding; F:ribonuclease P activity	0.061	5.9e-11	0	3.8e-06	0.97
476	Cgl1405		MULTISPECIES: Trm112 family protein	0	0	2.91	0	0	0	0	0.44	0.14	0	0	1
477	Cgl2020		ribosomal RNA large subunit methyltransferase N	0	0	2.91	0	0	P:GO:0030488; P:GO:0070475; F:GO:0000049; F:GO:0002935; F:GO:0019843; F:GO:0046872; F:GO:0051539; F:GO:0070040; C:GO:0005737	P:tRNA methylation; P:rRNA base methylation; F:tRNA binding; F:tRNA (adenine-C2-)-methyltransferase activity; F:rRNA binding; F:metal ion binding; F:4 iron, 4 sulfur cluster binding; F:rRNA (adenine-C2-)-methyltransferase activity; C:cytoplasm	0.038	0.0074	0	2e-16	0.0085
478	Cgl0705		septum formation inhibitor Maf	0	0	2.88	0	0	P:GO:0009117; F:GO:0035529; F:GO:0036218; C:GO:0005737	P:nucleotide metabolic process; F:NADH pyrophosphatase activity; F:dTTP diphosphatase activity; C:cytoplasm	4.2e-07	0.63	0	0	1
479	Cgl0768	whiB1	WhiB family transcriptional regulator	0	0	2.85	0	0	P:GO:0006355; F:GO:0003677; F:GO:0035731; F:GO:0046872; F:GO:0051539; C:GO:0005737	P:regulation of transcription, DNA-templated; F:DNA binding; F:dinitrosyl-iron complex binding; F:metal ion binding; F:4 iron, 4 sulfur cluster binding; C:cytoplasm	2.3e-15	3.5e-11	0	0	0.53
480	Cgl2629		ABC transporter ATP-binding protein	0	0	2.85	0	0	F:GO:0005524	F:ATP binding	4.3e-05	0.29	0	0	1
481	Cgl2850		HtaA domain-containing protein	0	0	2.84	0	0	0	0	0.47	0.081	0	1.4e-09	0.94
482	Cgl2312	ectP	multidrug DMT transporter permease	0	0	2.69	0	0	P:GO:0006814; P:GO:0006865; P:GO:0055085; F:GO:0005488; F:GO:0015293; C:GO:0005886; C:GO:0016021	P:sodium ion transport; P:amino acid transport; P:transmembrane transport; F:binding; F:symporter activity; C:plasma membrane; C:integral component of membrane	0.093	0.23	0	5.4e-09	1
483	Cgl2054	rpsP	30S ribosomal protein S16	0	0	2.67	0	0	P:GO:0006412; F:GO:0003735; C:GO:0005840	P:translation; F:structural constituent of ribosome; C:ribosome	0.85	2.2e-07	0	6e-16	0.031
484	Cgl1272	ilvN	acetolactate synthase 3 regulatory subunit	0	0	2.63	0	0	P:GO:0009097; P:GO:0009099; P:GO:0050790; F:GO:0003984; F:GO:1990610	P:isoleucine biosynthetic process; P:valine biosynthetic process; P:regulation of catalytic activity; F:acetolactate synthase activity; F:acetolactate synthase regulator activity	2.4e-17	4.3e-06	0	1.6e-06	1
485	Cgl1475		putative membrane protein	0	0	2.63	0	0	C:GO:0016021	C:integral component of membrane	1	2e-06	0	3.8e-06	0.053
486	Cgl2755		GNAT family N-acetyltransferase	0	0	2.63	0	0	P:GO:0006048; F:GO:0004343	P:UDP-N-acetylglucosamine biosynthetic process; F:glucosamine 6-phosphate N-acetyltransferase activity	0.016	0.64	0	0	1
487	Cgl1513		MULTISPECIES: hypothetical protein	0	0	2.57	0	0	0	0	0.91	0.0032	0	0.0029	0.2
488	Cgl1132	aroE2	shikimate 5-dehydrogenase	0	0	2.54	0	0	P:GO:0046394; F:GO:0004764	P:carboxylic acid biosynthetic process; F:shikimate 3-dehydrogenase (NADP+) activity	0.32	0.093	0	0	0.98
489	Cgl1920	dtxR	metal-dependent transcriptional regulator	0	0	2.54	0	0	P:GO:0006355; F:GO:0003677; F:GO:0003700; F:GO:0046914; F:GO:0046983; C:GO:0005737	P:regulation of transcription, DNA-templated; F:DNA binding; F:DNA-binding transcription factor activity; F:transition metal ion binding; F:protein dimerization activity; C:cytoplasm	2.4e-05	0.9	0	0	0.0083
490	Cgl1908		MULTISPECIES: DUF4193 domain-containing protein	0	0	2.52	0	0	0	0	0.0039	0.00041	0	0	0.28
491	Cgl1351		putative KAP-like P-loop ATPase	0	0	2.49	0	0	C:GO:0016020; C:GO:0016021	C:membrane; C:integral component of membrane	0.096	0.16	0	0.00037	0.21
492	Cgl1638		YhgE/Pip domain-containing protein	0	0	2.49	0	0	C:GO:0016021	C:integral component of membrane	0.89	0.094	0	1	1
493	Cgl1569	ctaA	heme A synthase	0	0	2.46	0	0	P:GO:0006784; F:GO:0016627; C:GO:0016021	P:heme A biosynthetic process; F:oxidoreductase activity, acting on the CH-CH group of donors; C:integral component of membrane	2.1e-05	4.1e-08	0	2.8e-15	0.81
494	Cgl2032		MULTISPECIES: DUF2469 domain-containing protein	0	0	2.43	0	0	0	0	0.071	0.002	0	1.6e-06	0.29
495	Cgl2214	glnA	glutamine synthetase	0	0	2.41	0	0	P:GO:0006542; F:GO:0004356; F:GO:0005524	P:glutamine biosynthetic process; F:glutamate-ammonia ligase activity; F:ATP binding	4e-07	1.1e-16	0	0	2.3e-05
496	Cgl0810		iron ABC transporter substrate-binding protein	0	0	2.4	0	0	P:GO:0055085; F:GO:0022857; C:GO:0005886; C:GO:0016021	P:transmembrane transport; F:transmembrane transporter activity; C:plasma membrane; C:integral component of membrane	2.9e-20	0.36	0	1.3e-05	0.81
497	Cgl1987	nusA	transcription elongation factor NusA	0	0	2.38	0	0	P:GO:0006414; P:GO:0031564; F:GO:0003700; F:GO:0003746; C:GO:0005737	P:translational elongation; P:transcription antitermination; F:DNA-binding transcription factor activity; F:translation elongation factor activity; C:cytoplasm	0.6	0.0043	0	0.00078	0.98
498	Cgl2351		MULTISPECIES: ribosome silencing factor	0	0	2.34	0	0	P:GO:0017148; P:GO:0042256; P:GO:0090071; C:GO:0005737	P:negative regulation of translation; P:mature ribosome assembly; P:negative regulation of ribosome biogenesis; C:cytoplasm	0.75	0.21	0	4.8e-14	0.67
499	Cgl0989		ribosomal protein S2	0	0	2.32	0	0	C:GO:0016021	C:integral component of membrane	5.3e-08	0.81	0	0	0.025
500	Cgl2332	thiX	thiamine biosynthesis protein ThiX	0	0	2.32	0	0	P:GO:0009228; C:GO:0005886	P:thiamine biosynthetic process; C:plasma membrane	0.5	6e-06	0	4e-15	0.62
501	Cgl2341	lepA	elongation factor 4	0	0	2.32	0	0	P:GO:0006414; P:GO:0045727; F:GO:0003746; F:GO:0003924; F:GO:0005525; F:GO:0043022; C:GO:0005886	P:translational elongation; P:positive regulation of translation; F:translation elongation factor activity; F:GTPase activity; F:GTP binding; F:ribosome binding; C:plasma membrane	0.021	0.83	0	0	0.0014
502	Cgl2979		PadR family transcriptional regulator	0	0	2.32	0	0	0	0	0.3	4.7e-07	0	0	7.1e-06
503	Cgl1406	tyrS	tyrosine--tRNA ligase	0	0	2.3	0	0	P:GO:0006437; F:GO:0003723; F:GO:0004831; F:GO:0005524; C:GO:0005737	P:tyrosyl-tRNA aminoacylation; F:RNA binding; F:tyrosine-tRNA ligase activity; F:ATP binding; C:cytoplasm	1	0.0015	0	0	0.55
504	Cgl1990		ABC transporter substrate-binding protein	0	0	2.3	0	0	P:GO:0055085; C:GO:0043190	P:transmembrane transport; C:ATP-binding cassette (ABC) transporter complex	0.37	0.36	0	0.031	0.43
505	Cgl2210		DUF4191 domain-containing protein	0	0	2.3	0	0	C:GO:0016021	C:integral component of membrane	0.0034	0.31	0	8.3e-11	2.3e-09
506	Cgl1098		GTP-binding protein TypA	0	0	2.23	0	0	P:GO:0006414; F:GO:0003746; F:GO:0003924; F:GO:0005525	P:translational elongation; F:translation elongation factor activity; F:GTPase activity; F:GTP binding	0.28	3.3e-13	0	7.8e-09	0.16
507	Cgl1958		biotin transporter BioY	0	0	2.23	0	0	P:GO:0015878; F:GO:0015225; C:GO:0005886; C:GO:0016021	P:biotin transport; F:biotin transmembrane transporter activity; C:plasma membrane; C:integral component of membrane	0.69	1.9e-05	0	0.77	1
[truncated: 220 more rows]

## Sheet: Dataset S4
Table S4: List of genes upregulated at later time points (24 h to 65 h) in presence of 50mM of [Chl][Lys]
[truncated: 71 more rows]

[truncated: 2 more sheets: Dataset S5, Dataset S6]
